# Supplementary material for: HER2 is not a cancer subtype but rather a pan-cancer event and is highly enriched in AR-driven breast tumors
Source: PubMed Central journal article supplement (PMC5791377; doi:10.1186/s13058-018-0933-y), 2018-01-30

**A**

| C2 gene set                                    | Annotation                                                                                                                 | # genes / gene set size | # sign. genes up / # genes up | # sign. genes down / # genes down | Adj. p-value | JG score |
|------------------------------------------------|----------------------------------------------------------------------------------------------------------------------------|-------------------------|-------------------------------|-----------------------------------|--------------|----------|
| Doane breast cancer classes up                 | Genes up-regulated in ER-/PR-breast tumors with molecular similarity to ER+, relative to the rest of the ER-/PR- samples   | 64/72                   | 58/63                         | 0/1                               | 4e-19        | 58.6     |
| Smid breast cancer ERBB2 up                    | Genes up-regulated in HER2E tumors (positive control)                                                                      | 112/147                 | 88/110                        | 0/2                               | 2e-12        | 53.8     |
| Doane breast cancer ESR1 dn                    | Genes down-regulated in ER+ vs. ER- breast tumors                                                                          | 44/48                   | 2/4                           | 35/40                             | 5e-12        | -42.5    |
| Farmer breast cancer cluster 6                 | Selected luminal genes                                                                                                     | 16/16                   | 13/16                         | 0/0                               | 4e-11        | 27.6     |
| Smid breast cancer relapse in brain up         | Genes up-regulated in brain relapse of breast cancer, relative to other sites                                              | 36/39                   | 0/2                           | 24/34                             | 6e-8         | -29.7    |
| Farmer breast cancer cluster 7                 | Selected apocrine/luminal genes                                                                                            | 18/20                   | 15/18                         | 0/0                               | 2e-7         | 22.3     |
| Doane breast cancer classes dn                 | Genes down-regulated in ER-/PR-breast tumors with molecular similarity to ER+, relative to the rest of the ER-/PR- samples | 31/34                   | 0/1                           | 20/30                             | 4e-7         | -23.5    |
| Landemaine lung metastasis                     | Genes up-regulated in lung relapse of breast cancer, relative to other sites                                               | 21/21                   | 1/2                           | 15/19                             | 1e-6         | -24.0    |
| Yang breast cancer ESR1 dn                     | Genes down-regulated in ER+ vs. ER- breast tumors                                                                          | 25/25                   | 1/2                           | 15/23                             | 2e-6         | -21.2    |
| Lien breast carcinoma metaplastic vs ductal up | Genes up-regulated in metaplastic vs. ductal breast carcinoma                                                              | 70/83                   | 1/11                          | 37/59                             | 5e-6         | -30.0    |

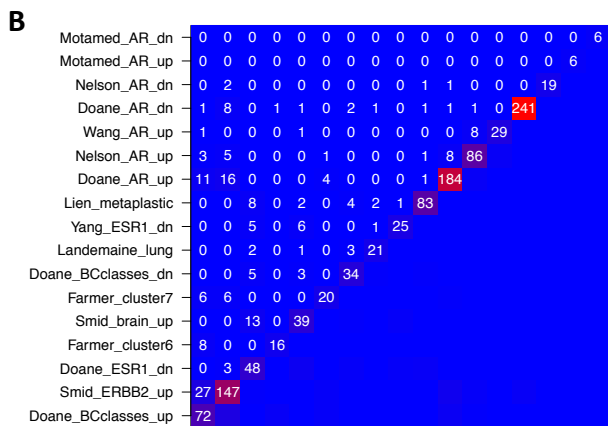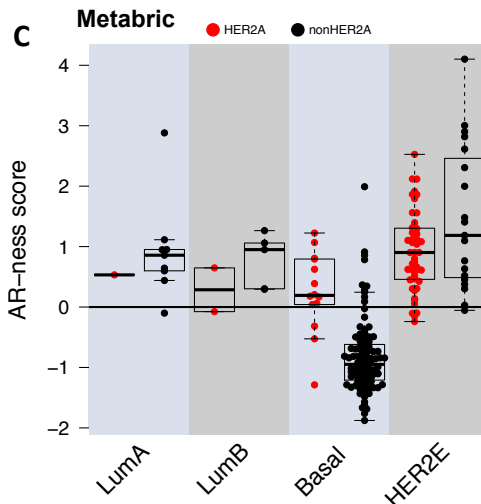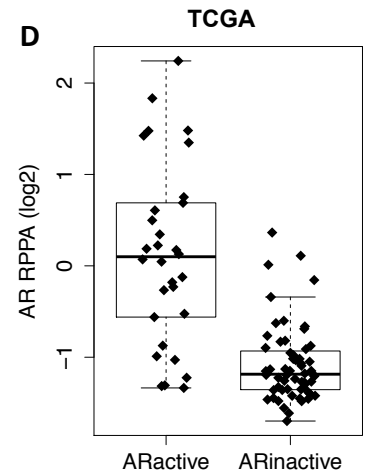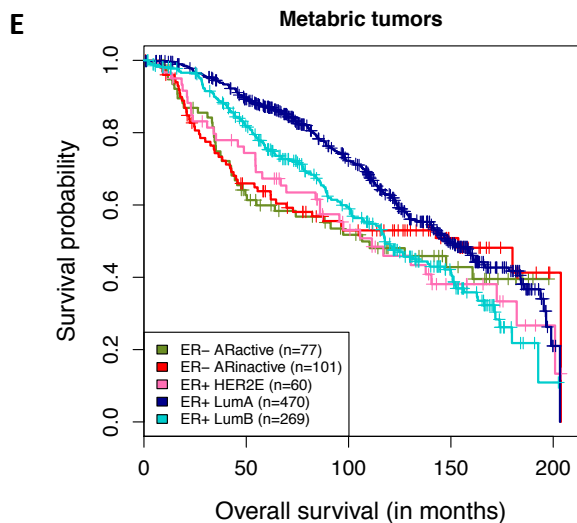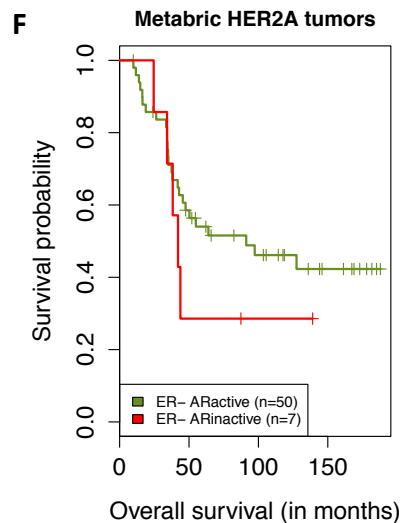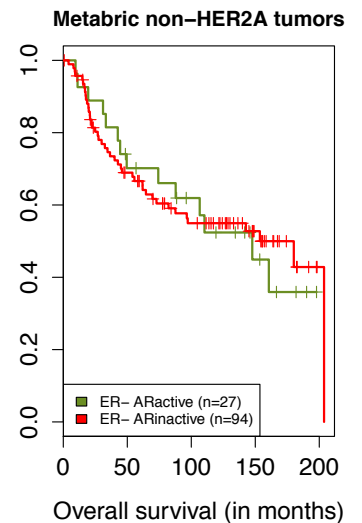

Supplement: 13058_2018_933_MOESM8_ESM.pdf [file 13058_2018_933_MOESM8_ESM.pdf]
