# Supplementary material for: HER2 is not a cancer subtype but rather a pan-cancer event and is highly enriched in AR-driven breast tumors
Source: PubMed Central journal article supplement (PMC5791377; doi:10.1186/s13058-018-0933-y), 2018-01-30
Supplement: 13058_2018_933_MOESM3_ESM.pdf [file 13058_2018_933_MOESM3_ESM.pdf]

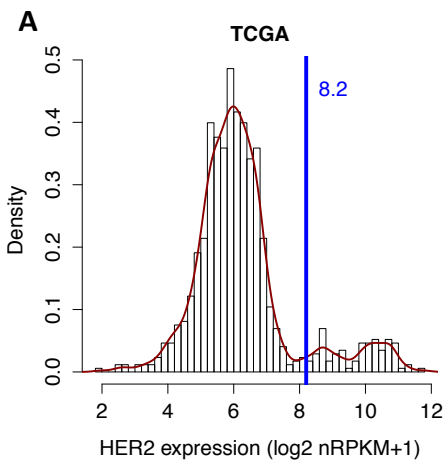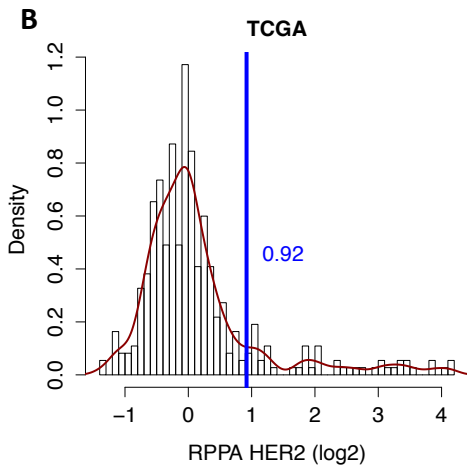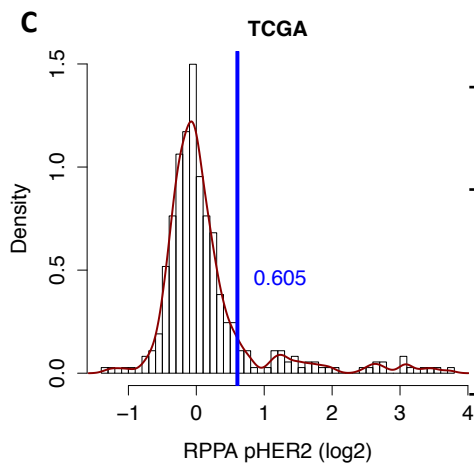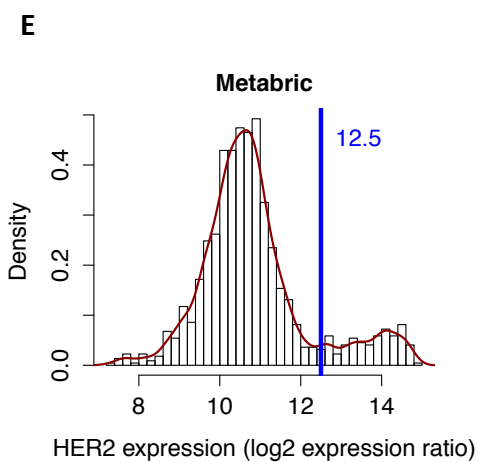

**D**

| TCGA                      |          | CN / ploidy         |                 | CN                  |                 | CN / 17p            |                 |
|---------------------------|----------|---------------------|-----------------|---------------------|-----------------|---------------------|-----------------|
|                           |          | HER2A (n=106) n (%) | Non-HER2A n (%) | HER2A (n=118) n (%) | Non-HER2A n (%) | HER2A (n=200) n (%) | Non-HER2A n (%) |
| <b>RNA expression</b>     | o/e      | 83 (78)             | 7 (0.9)         | 81 (69)             | 9 (1.2)         | 85 (42)             | 5 (0.8)         |
|                           | Non-o/e  | 23 (22)             | 751 (99)        | 37 (31)             | 737 (99)        | 115 (58)            | 659 (99)        |
| <b>Protein level</b>      | High     | 38 (78)             | 10 (3.1)        | 38 (70)             | 10 (3.2)        | 41 (49)             | 7 (2.5)         |
|                           | Low      | 11 (22)             | 308 (97)        | 16 (30)             | 303 (97)        | 42 (51)             | 277 (98)        |
| <b>Phospho-HER2 level</b> | High     | 35 (71)             | 10 (3.1)        | 34 (63)             | 11 (3.5)        | 36 (43)             | 9 (3.2)         |
|                           | Low      | 14 (29)             | 308 (97)        | 20 (37)             | 302 (96)        | 47 (57)             | 275 (97)        |
| <b>Clinical status</b>    | Positive | 80 (91)             | 27 (4.5)        | 80 (85)             | 27 (4.6)        | 88 (55)             | 19 (3.6)        |
|                           | Negative | 8 (9)               | 568 (95)        | 14 (15)             | 562 (95)        | 72 (45)             | 504 (96)        |
| <b>PAM50 subtype</b>      | HER2E    | 48 (45)             | 25 (3.3)        | 48 (41)             | 25 (3.3)        | 50 (25)             | 23 (3.5)        |
|                           | Lum A    | 19 (18)             | 404 (53)        | 23 (19)             | 400 (54)        | 71 (35)             | 352 (53)        |
|                           | Lum B    | 32 (30)             | 182 (24)        | 39 (33)             | 175 (23)        | 66 (33)             | 148 (22)        |
|                           | Basal    | 7 (7)               | 147 (19)        | 8 (6.8)             | 146 (20)        | 13 (6.5)            | 141 (21)        |

**F**

| Metabric               |          | CN / ploidy         |                 | CN                  |                 | CN / 17p            |                 |
|------------------------|----------|---------------------|-----------------|---------------------|-----------------|---------------------|-----------------|
|                        |          | HER2A (n=133) n (%) | Non-HER2A n (%) | HER2A (n=131) n (%) | Non-HER2A n (%) | HER2A (n=203) n (%) | Non-HER2A n (%) |
| <b>RNA expression</b>  | o/e      | 120 (90)            | 13 (1.3)        | 105 (80)            | 28 (2.9)        | 117 (58)            | 16 (1.8)        |
|                        | Non-o/e  | 13 (10)             | 961 (99)        | 26 (20)             | 948 (97)        | 86 (42)             | 888 (98)        |
| <b>Clinical status</b> | Positive | 50 (89)             | 21 (5.2)        | 42 (81)             | 29 (7.1)        | 51 (61)             | 20 (5.3)        |
|                        | Negative | 6 (11)              | 382 (95)        | 10 (19)             | 378 (93)        | 33 (39)             | 355 (95)        |
| <b>PAM50 subtype</b>   | HER2E    | 71 (53)             | 64 (6.6)        | 60 (46)             | 75 (7.7)        | 71 (35)             | 64 (7.1)        |
|                        | Lum A    | 14 (11)             | 504 (52)        | 21 (16)             | 497 (51)        | 47 (23)             | 471 (52)        |
|                        | Lum B    | 27 (20)             | 260 (27)        | 31 (24)             | 256 (26)        | 61 (30)             | 226 (25)        |
|                        | Basal    | 21 (16)             | 146 (15)        | 19 (14)             | 148 (15)        | 24 (12)             | 143 (16)        |

**G**

USO1062

Density

HER2 expression (normalized log<sub>10</sub> counts)

1.02

**H**

| USO1062                |          | CN                 |                 |
|------------------------|----------|--------------------|-----------------|
|                        |          | HER2A (n=79) n (%) | Non-HER2A n (%) |
| <b>RNA expression</b>  | o/e      | 58 (73)            | 11 (1.2)        |
|                        | Non-o/e  | 21 (27)            | 897 (99)        |
| <b>Clinical status</b> | Positive | 67 (87)            | 56 (6.2)        |
|                        | Negative | 10 (13)            | 849 (94)        |
| <b>PAM50 subtype</b>   | HER2E    | 30 (38)            | 40 (4.4)        |
|                        | Lum A    | 26 (33)            | 464 (51)        |
|                        | Lum B    | 17 (21)            | 109 (12)        |
|                        | Basal    | 6 (8)              | 295 (32)        |
