# Supplementary material for: HER2 is not a cancer subtype but rather a pan-cancer event and is highly enriched in AR-driven breast tumors
Source: PubMed Central journal article supplement (PMC5791377; doi:10.1186/s13058-018-0933-y), 2018-01-30

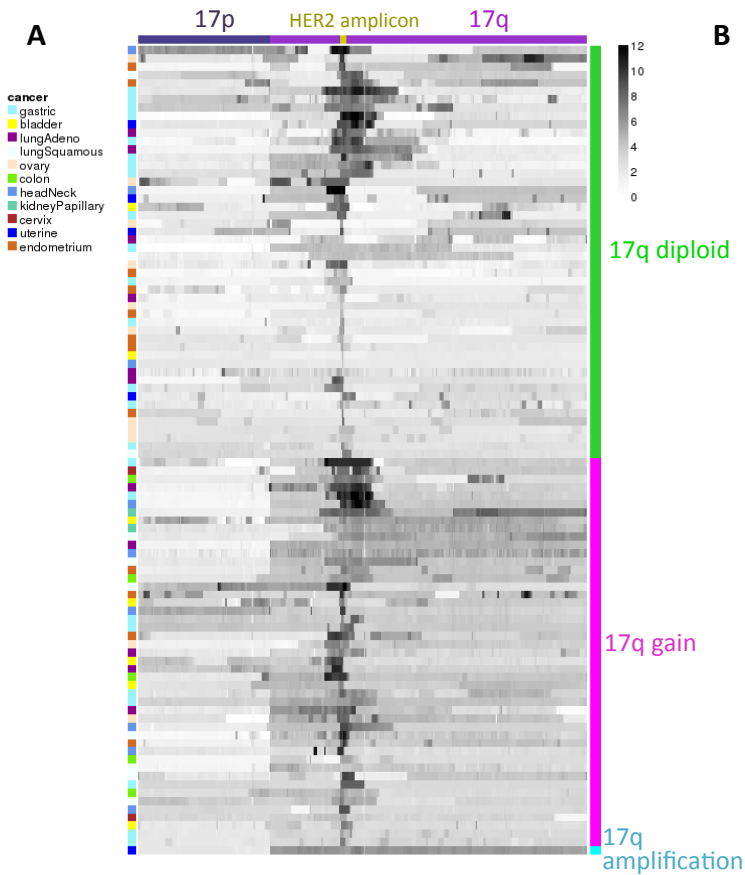

**B**

|                        |                             | HER2A      | Non-HER2A |
|------------------------|-----------------------------|------------|-----------|
| <b>Gastric</b>         | Chromosomal instable        | 21 (16.4%) | 107       |
|                        | Epstein-Barr virus-positive | 3 (12.5%)  | 21        |
|                        | Genomically stable          | 0 (0%)     | 49        |
|                        | Microsatellite instable     | 0 (0%)     | 58        |
| <b>Bladder</b>         | I Papillary-like / luminal  | 2 (5.1%)   | 37        |
|                        | II Luminal                  | 3 (7.9%)   | 35        |
|                        | III Basal / squamous-like   | 2 (7.1%)   | 26        |
|                        | IV                          | 0 (0%)     | 15        |
| <b>Colon</b>           | CMS1                        | 0 (0%)     | 33        |
|                        | CMS2                        | 3 (4.8%)   | 60        |
|                        | CMS3                        | 0 (0%)     | 32        |
|                        | CMS4                        | 1 (1.8%)   | 55        |
| <b>Ovary</b>           | Differentiated              | 4 (3.9%)   | 99        |
|                        | Immunoreactive              | 3 (3.5%)   | 83        |
|                        | Mesenchymal                 | 2 (2.2%)   | 89        |
|                        | Proliferative               | 2 (1.8%)   | 107       |
| <b>Head &amp; Neck</b> | Atypical                    | 2 (3%)     | 65        |
|                        | Basal                       | 0 (0%)     | 82        |
|                        | Classical                   | 3 (6.1%)   | 46        |
|                        | Mesenchymal                 | 1 (1.4%)   | 70        |

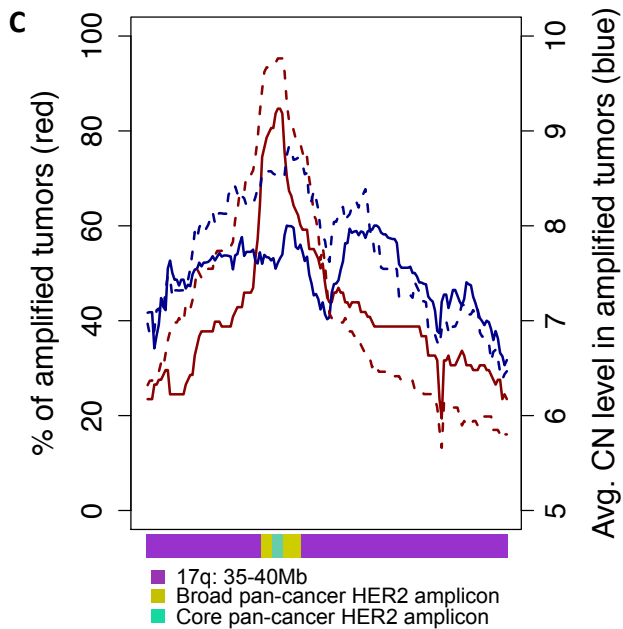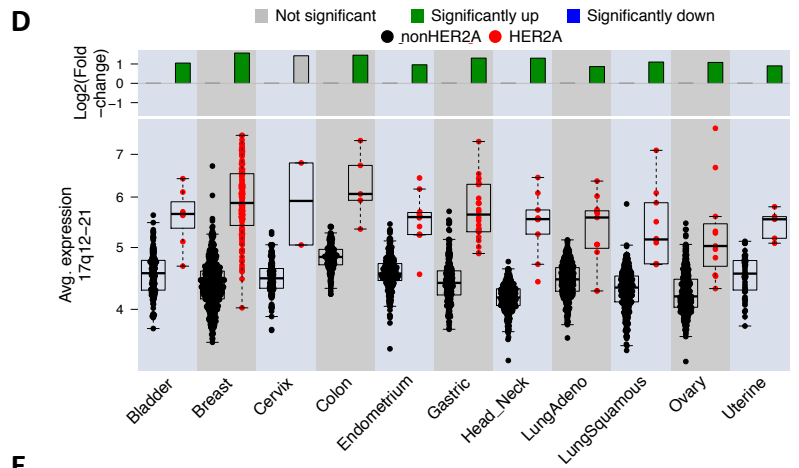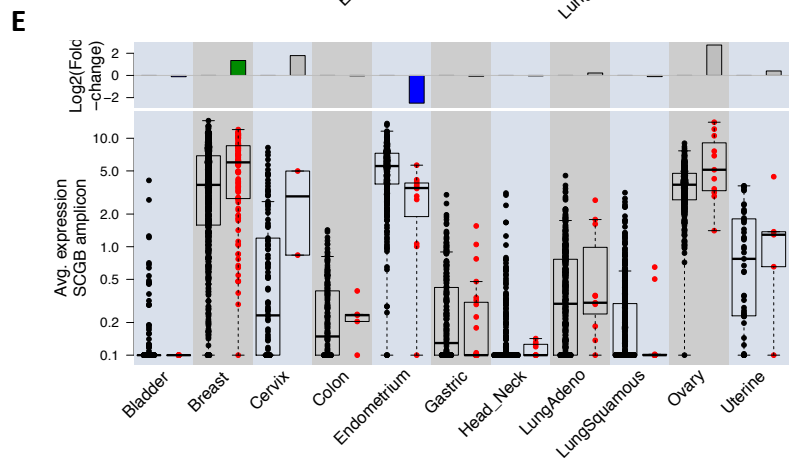

Supplement: 13058_2018_933_MOESM12_ESM.pdf [file 13058_2018_933_MOESM12_ESM.pdf]
