# Supplementary material for: HER2 is not a cancer subtype but rather a pan-cancer event and is highly enriched in AR-driven breast tumors
Source: PubMed Central journal article supplement (PMC5791377; doi:10.1186/s13058-018-0933-y), 2018-01-30

**A Breast**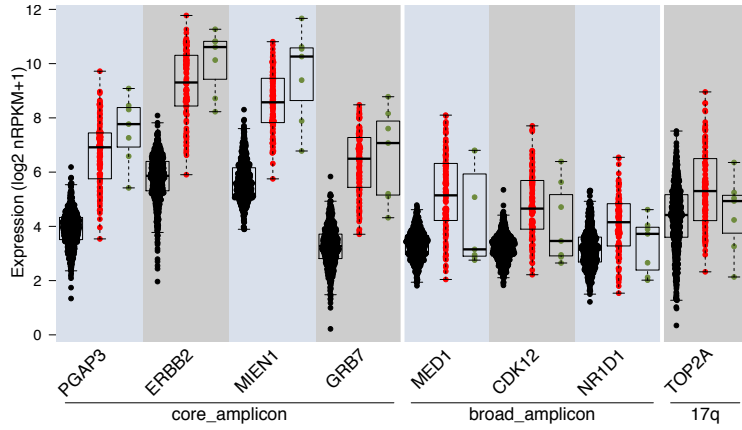**B Gastric**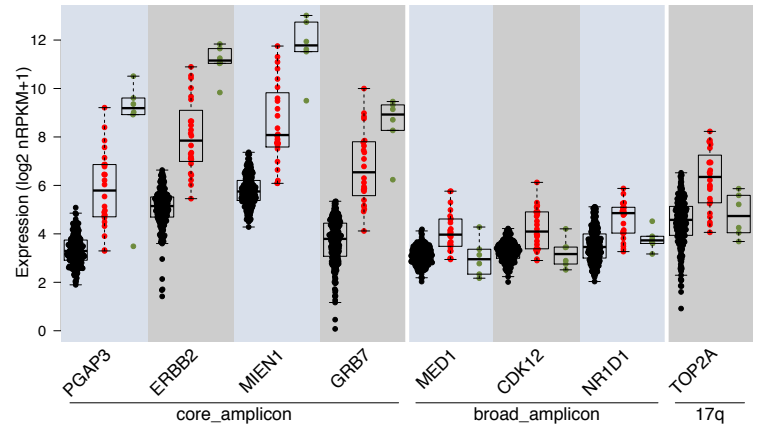**C Endometrium**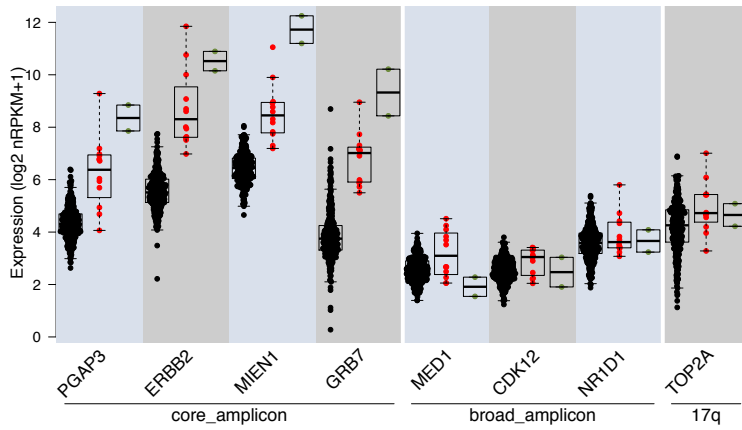**D Cervix**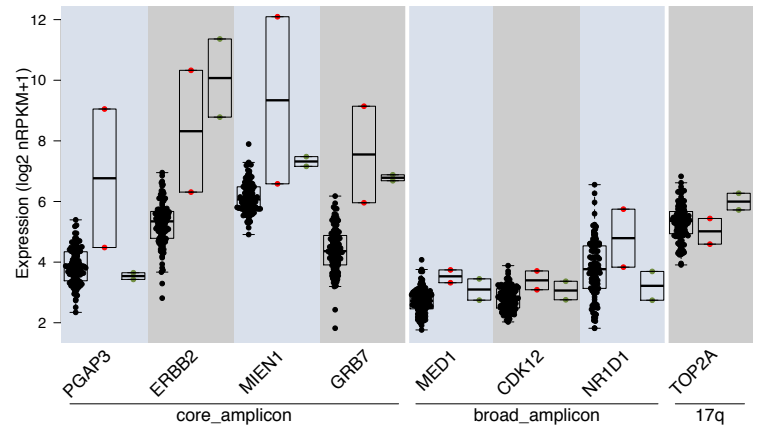**E Bladder**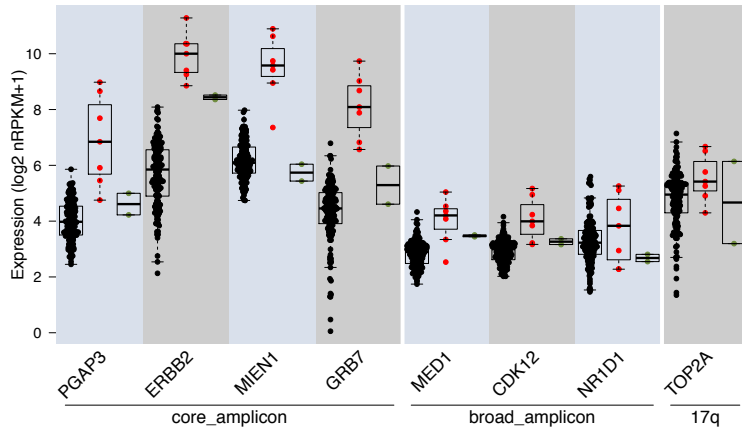**F Lung squamous**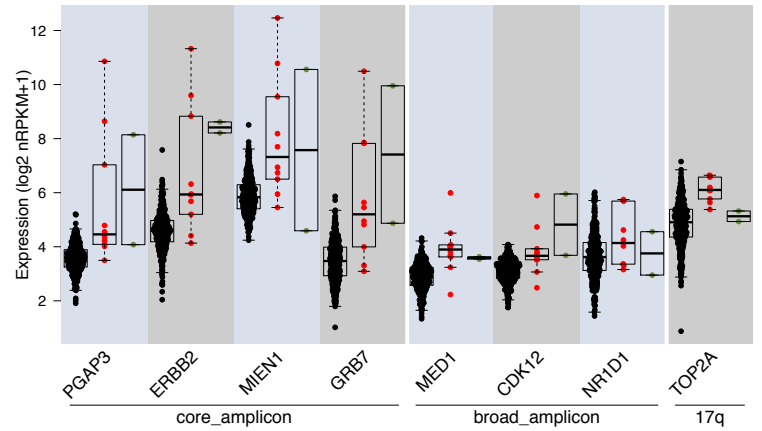**G Lung adenocarcinoma**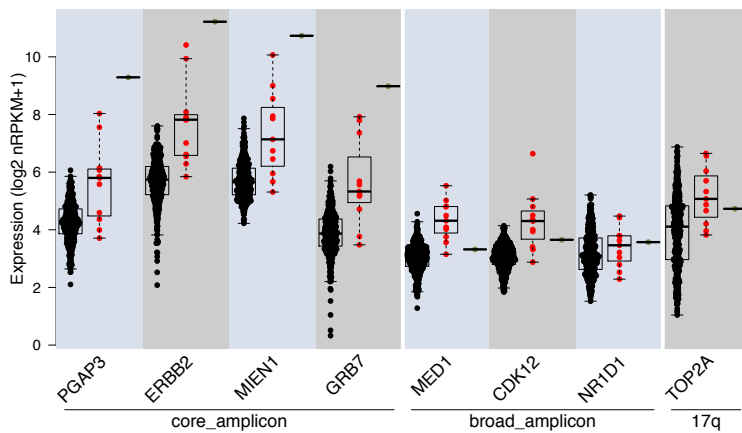**H Ovary**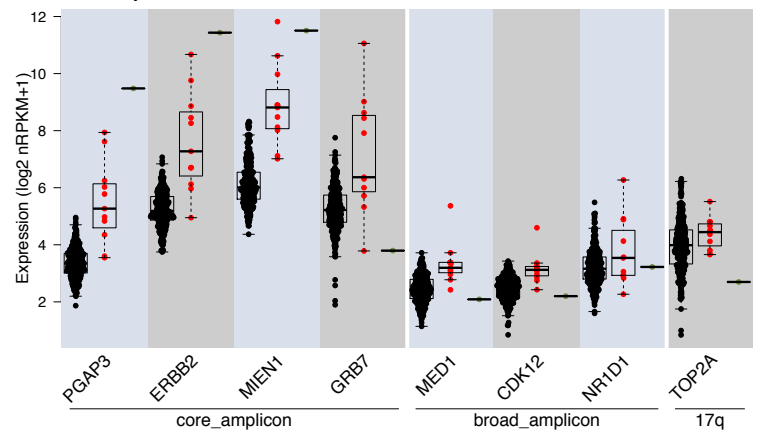

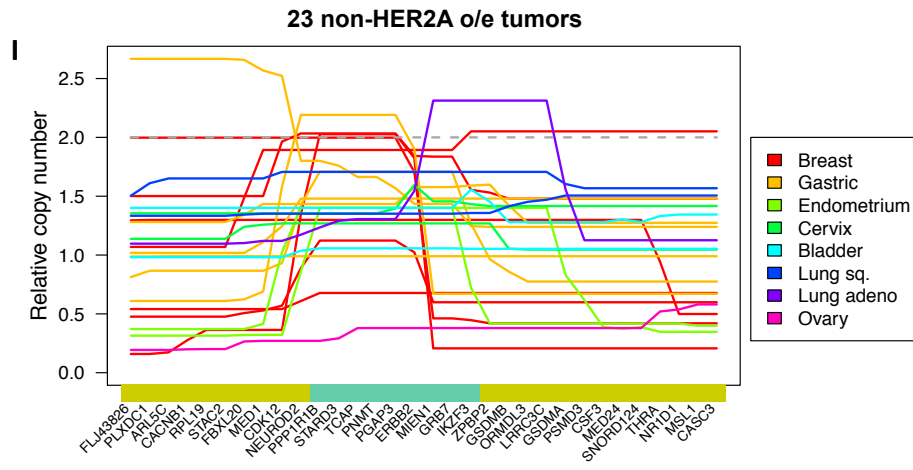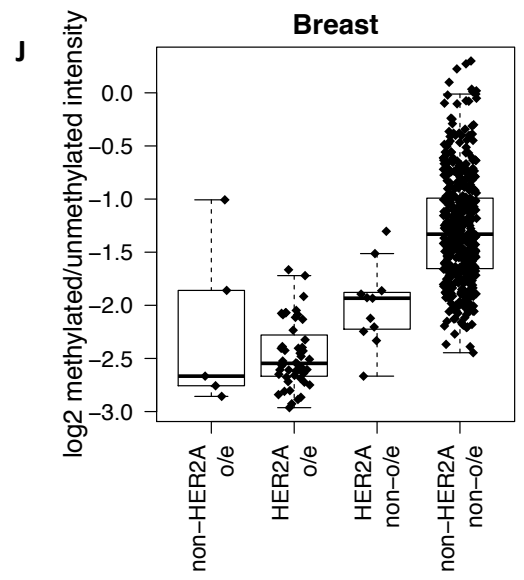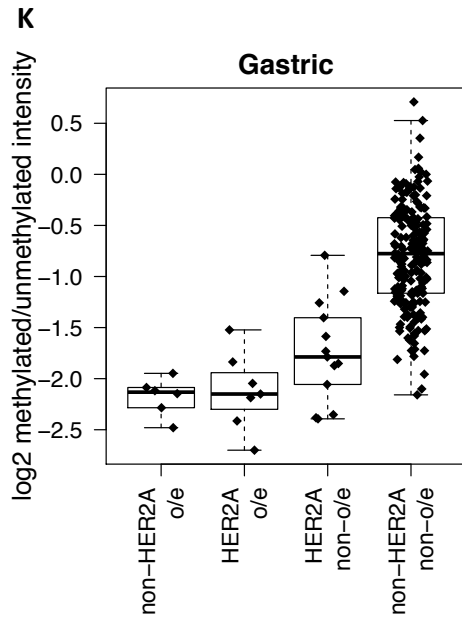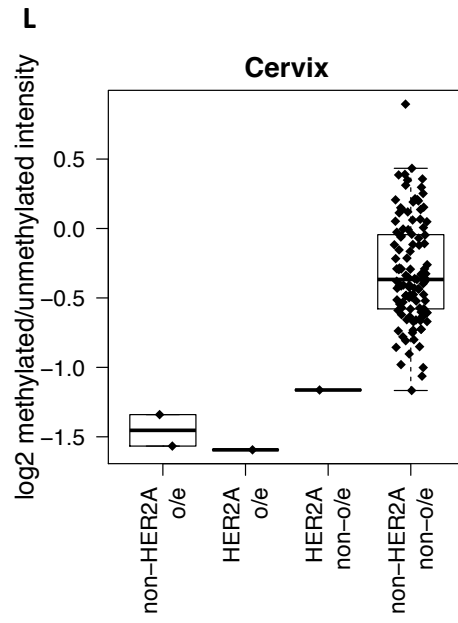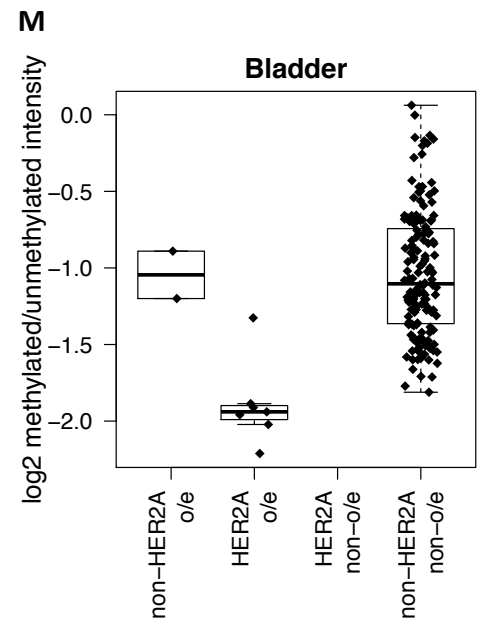

Supplement: 13058_2018_933_MOESM13_ESM.pdf [file 13058_2018_933_MOESM13_ESM.pdf]
