# Supplementary material for: HER2 is not a cancer subtype but rather a pan-cancer event and is highly enriched in AR-driven breast tumors
Source: Springer Nature journal article supplement (doi:10.1186/s13058-018-0933-y), 2018-01-30
Supplement: MOESM11 [file 15426366]

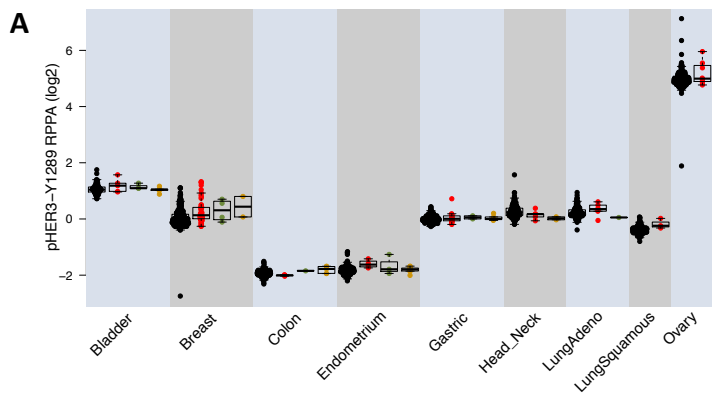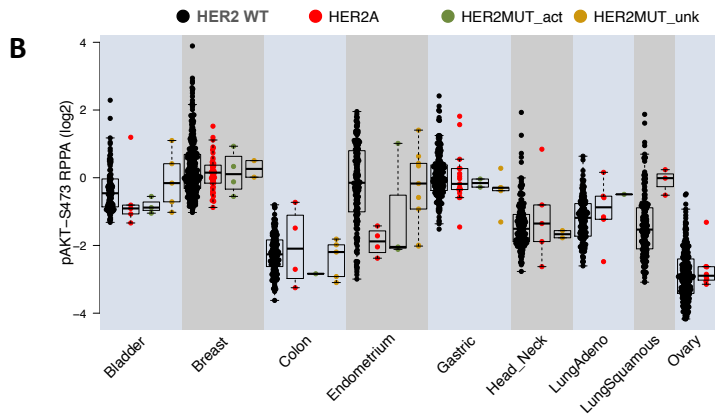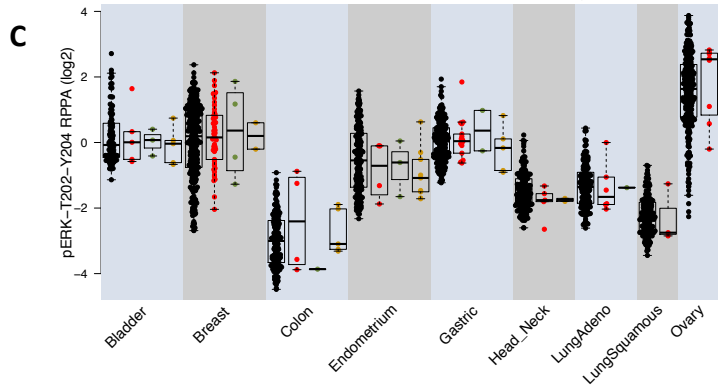

| D                   | Total # patients (%) | # HER2A (%) | # non-HER2A (%) | Fisher's exact test, p-value | Activating HER2 mutations (# tumors)                                        |
|---------------------|----------------------|-------------|-----------------|------------------------------|-----------------------------------------------------------------------------|
| Breast              | 21 (3.1)             | 4 (4.4)     | 17 (2.9)        | 0.51                         | G309A (1), S310F (1), L755S (3), D769H (1), D769Y (2), V777L (1), V842I (1) |
| Gastric             | 9 (3.8)              | 0 (0)       | 9 (4.1)         | 1.00                         | S310F (2), V842I (1)                                                        |
| Bladder             | 13 (8.6)             | 2 (28.6)    | 11 (7.6)        | 0.11                         | S310F (4), L755S (1), T862A (1)                                             |
| Lung Adenocarc.     | 2 (0.5)              | 0 (0)       | 2 (0.5)         | 1.00                         | S310F (1)                                                                   |
| Lung Sq. cell carc. | 4 (1.2)              | 0 (0)       | 4 (1.3)         | 1.00                         |                                                                             |
| Ovary               | 1 (0.4)              | 0 (0)       | 1 (0.4)         | 1.00                         | V842I (1)                                                                   |
| Colon               | 7 (4.1)              | 1 (20)      | 6 (3.6)         | 0.19                         | S310F (1), V777L (1)                                                        |
| Head & Neck         | 2 (0.6)              | 0 (0)       | 2 (0.6)         | 1.00                         |                                                                             |
| Cervix              | 3 (3.5)              | 0 (0)       | 3 (3.6)         | 1.00                         | S310F (2)                                                                   |
| Uterine             | 0 (0)                | 0 (0)       | 0 (0)           | --                           |                                                                             |
| Endometrium         | 27 (7.9)             | 0 (0)       | 27 (8.2)        | 1.00                         | L755S (3), V842I (4)                                                        |
