# Supplementary material for: HER2 is not a cancer subtype but rather a pan-cancer event and is highly enriched in AR-driven breast tumors
Source: Breast Cancer Res. 2018 Jan 30;20:8. doi: 10.1186/s13058-018-0933-y (PMC5791377; doi:10.1186/s13058-018-0933-y)
Supplement: Supplementary file 1 — Flow chart summarizing sample size and available data for the TCGA, Metabric and USO1062 cohort; Clinical metadata, subtype information, HER2A status, AR-ness score, HER2 copy number, and expression levels of ERBB2, ER, PR and AR for the tumors in these three cohorts. (XLSX 669 kb) [file 13058_2018_933_MOESM1_ESM.xlsx]

## Sheet: Flow chart
Flow chart summarizing sample size and available data for the TCGA, Metabric and USO1062 cohort

## Sheet: TCGA
Clinical metadata, subtype information, HER2A status, AR-ness score, HER2 copy number, and expression levels of ERBB2, ER, PR and AR for TCGA tumors
Tumor	ER IHC	PR IHC	Clinical HER2 status	PAM50 subtype	HER2A status	AR-ness	HER2 copy number	HER2 copy number / tumor ploidy	ERBB2 expression (log2 nRPKM+1)	ER expression (log2 nRPKM+1)	PR expression (log2 nRPKM+1)	AR expression (log2 nRPKM+1)	HER2 protein (RPPA) (log2)	pHER2 protein (RPPA) (log2)
TCGA-A1-A0SD-01	Positive	Positive	Negative	Luminal A	non-HER2A		2.03399	1.20216	6.86596	6.05896	1.81467	3.57812	NA	NA
TCGA-A1-A0SE-01	Positive	Positive	Negative	Luminal A	non-HER2A		1.88845	1.08418	6.38545	4.95441	4.69886	3.76379	NA	NA
TCGA-A1-A0SF-01	Positive	Positive	Negative	Luminal A	non-HER2A		2.67137	0.91491	6.1635	5.74231	4.65861	3.39748	NA	NA
TCGA-A1-A0SG-01	Positive	Positive	Negative	Luminal A	non-HER2A		1.93389	1.00266	6.66826	6.87402	5.81253	3.27159	NA	NA
TCGA-A1-A0SH-01	Negative	Positive	Negative	Luminal A	non-HER2A	Positive	3.06802	1.59108	7.43467	3.38714	4.20574	3.53867	0.475866	0.40784
TCGA-A1-A0SI-01	Positive	Positive	Negative	Luminal B	non-HER2A		2.38334	0.651059	5.38287	4.86529	1.0988	3.63718	NA	NA
TCGA-A1-A0SJ-01	Positive	Positive	Negative	Luminal A	non-HER2A		3.71586	1.16882	6.43659	5.06944	3.88346	2.7124	0.347416	0.287056
TCGA-A1-A0SK-01	Negative	Negative	Negative	Basal-like	non-HER2A	Positive	3.22428	0.963675	1.96466	0.0759018	0.0426263	0.0636229	-1.11442	-0.502883
TCGA-A1-A0SM-01	Positive	Negative	Positive	Luminal B	HER2A		6.19525	3.55676	10.747	5.31472	0.396271	2.27197	NA	NA
TCGA-A1-A0SN-01	Positive	Positive	Positive	Luminal B	HER2A		8.74027	3.11749	10.4971	6.5219	2.63508	2.94376	NA	NA
TCGA-A1-A0SO-01	Negative	Negative	Negative	Basal-like	non-HER2A	Negative	3.3275	1.30087	6.56973	0.144374	0.0637943	0.0617062	0.10153	-0.037447
TCGA-A1-A0SP-01	Negative	Negative	Negative	Basal-like	non-HER2A	Negative	1.07299	0.66503	4.84531	0.945245	0.159813	0.0562358	NA	NA
TCGA-A1-A0SQ-01	Positive	Positive	Negative	Luminal A	non-HER2A		2.77176	1.04921	5.79054	6.54581	4.99257	1.9001	NA	NA
TCGA-A2-A04N-01	Positive	Positive	Negative	Luminal A	non-HER2A		2.33331	1.11873	5.79255	6.61957	5.8881	2.56263	-0.445218	-0.116395
TCGA-A2-A04P-01	Negative	Negative	Negative	Basal-like	non-HER2A	Negative	1.97047	0.664317	4.76685	2.8688	0.104344	0.0352229	-0.218922	-0.236961
TCGA-A2-A04Q-01	Negative	Negative	Negative	Basal-like	non-HER2A	Negative	1.88975	0.921166	4.9554	0.912419	0.527187	0.299208	-0.539757	0.779126
TCGA-A2-A04R-01	Positive	Positive	Negative	Luminal B	non-HER2A		3.99075	1.17383	6.15269	6.17335	4.25248	2.83459	NA	NA
TCGA-A2-A04T-01	Negative	Negative	Negative	Basal-like	non-HER2A	Negative	2.10137	0.671647	5.56138	0.262762	0.0767076	0.044981	-0.328978	-0.185565
TCGA-A2-A04U-01	Negative	Negative	Negative	Basal-like	non-HER2A	Negative	2.83195	0.874114	4.43619	0.0663493	0.0412832	0.00807321	-0.547379	-0.155436
TCGA-A2-A04W-01	Negative	Negative	Positive	HER2E	HER2A	Positive	14.1944	4.8614	9.88076	1.06173	0.163756	2.02443	2.06273	1.12804
TCGA-A2-A04X-01	Positive	Positive	Positive	HER2E	HER2A		6.19716	3.44309	9.26749	3.26588	2.33648	1.91609	NA	NA
TCGA-A2-A04Y-01	Positive	Positive	Negative	Luminal B	non-HER2A		2.06412	1.02028	6.04508	5.51064	1.90252	0.5996	0.516312	0.171449
TCGA-A2-A0CK-01	Positive	Positive	NA	Luminal A	non-HER2A		1.94514	1.0807	6.4975	4.45563	2.99054	0.951809	NA	NA
TCGA-A2-A0CL-01	Positive	Positive	Negative	HER2E	non-HER2A		2.17068	0.834931	4.88076	2.96121	0.742416	3.46996	-0.814646	-0.307424
TCGA-A2-A0CM-01	Negative	Negative	Negative	Basal-like	non-HER2A	Negative	2.30908	0.737848	4.50997	1.03368	0.0851723	0.0386183	-0.330868	-0.443432
TCGA-A2-A0CO-01	Positive	Positive	NA	Luminal A	non-HER2A		2.13356	1.14891	6.60202	5.41588	2.05058	2.83891	NA	NA
TCGA-A2-A0CP-01	Positive	Positive	Negative	Luminal A	non-HER2A		1.99464	1.01774	5.88071	4.97473	5.10309	1.55649	-0.72032	-0.293536
TCGA-A2-A0CQ-01	Positive	Positive	Negative	Luminal A	non-HER2A		2.8822	1.01948	5.93396	6.65774	3.79009	1.37988	0.300372	-0.128481
TCGA-A2-A0CT-01	Positive	Negative	Negative	Luminal A	non-HER2A		6.23957	1.60824	7.1779	6.68798	0.195286	2.8862	0.84185	0.469545
TCGA-A2-A0CU-01	Positive	Positive	Negative	Luminal A	non-HER2A		4.07119	1.45175	6.97163	7.72455	1.13394	3.39818	0.705389	0.173823
TCGA-A2-A0CV-01	Positive	Positive	Negative	Luminal A	non-HER2A		1.99601	0.672929	5.58549	5.99457	3.61618	3.16588	-0.218175	-0.335007
TCGA-A2-A0CW-01	Positive	Positive	Negative	Luminal B	non-HER2A		3.09143	0.89487	6.35823	7.11385	3.51662	2.28631	-0.0194374	-0.198423
TCGA-A2-A0CX-01	Positive	Negative	Positive	HER2E	HER2A		10.2068	3.26233	9.96362	1.52325	0.259411	3.46887	2.324	1.47708
TCGA-A2-A0D0-01	Negative	Negative	Negative	Basal-like	non-HER2A	Negative	1.69575	0.631872	4.74709	0.0617707	0.0178818	0.0129849	-1.06167	-0.461626
TCGA-A2-A0D1-01	Negative	Negative	Positive	HER2E	HER2A	Positive	10.5476	3.25565	9.68123	0.517104	0.0796671	3.32768	1.77168	1.46442
TCGA-A2-A0D2-01	Negative	Negative	Negative	Basal-like	non-HER2A	Negative	0.981955	0.520386	5.1275	0.387098	0.304086	0.165064	-0.583064	-0.188723
TCGA-A2-A0D3-01	Positive	Positive	Negative	Luminal A	non-HER2A		1.99236	0.984806	6.61431	6.23198	5.41904	3.84029	0.243343	0.21534
TCGA-A2-A0D4-01	Positive	Positive	Negative	Luminal B	non-HER2A		3.99308	1.23251	6.6541	6.15911	0.946561	1.0753	0.166148	-0.138301
TCGA-A2-A0EM-01	Positive	Positive	Negative	Luminal A	non-HER2A		1.92362	0.981503	6.12625	6.89365	6.18825	3.60237	NA	NA
TCGA-A2-A0EN-01	Positive	Positive	Negative	Luminal A	non-HER2A		2.07285	1.09232	5.95373	5.77424	0.341066	2.9968	NA	NA
TCGA-A2-A0EO-01	Positive	Positive	Negative	Luminal A	non-HER2A		3.76226	1.07421	6.85672	5.69292	5.32496	3.31164	0.20831	-0.00765553
TCGA-A2-A0EP-01	Positive	Negative	NA	Luminal A	non-HER2A		1.82657	0.983113	4.46921	4.15031	0.285142	1.7299	NA	NA
TCGA-A2-A0EQ-01	Negative	Negative	Positive	HER2E	non-HER2A	Positive	2.59887	0.972554	5.85149	2.31201	0.0651681	1.43577	-0.255004	0.221081
TCGA-A2-A0ER-01	Positive	Positive	Negative	Luminal B	non-HER2A		1.85429	0.977662	6.134	7.66817	2.43258	3.83424	-0.257006	0.144146
TCGA-A2-A0ET-01	Positive	Positive	Negative	Luminal A	non-HER2A		4.01173	1.37397	6.30443	7.1105	3.32618	3.21893	NA	NA
TCGA-A2-A0EU-01	Positive	Positive	Negative	Luminal A	non-HER2A		2.10759	1.093	5.78551	7.00303	5.76553	3.29215	-0.654138	-0.0975362
TCGA-A2-A0EV-01	Positive	Positive	Negative	Luminal A	non-HER2A		5.15078	1.73608	6.885	6.54547	5.14654	2.83461	0.034861	0.189929
TCGA-A2-A0EX-01	Positive	Positive	Negative	Luminal A	non-HER2A		2.02324	1.04926	7.02861	4.96204	4.32529	3.26597	-0.0932585	0.0706291
TCGA-A2-A0EY-01	Positive	Negative	Positive	Luminal B	HER2A		10.0659	3.26835	9.82003	5.51801	0.190722	5.67041	2.65066	1.86996
TCGA-A2-A0ST-01	Negative	Negative	Negative	Basal-like	non-HER2A	Positive	2.01389	1.06181	5.34049	3.25779	0.671749	2.10113	-1.15368	-0.104795
TCGA-A2-A0SU-01	Positive	Positive	Negative	Luminal A	non-HER2A		1.94771	1.11761	6.48238	8.03427	2.58594	2.9768	0.656915	0.176339
TCGA-A2-A0SV-01	Positive	Positive	Negative	Luminal B	non-HER2A		2.76861	1.2853	5.92733	3.99054	1.8928	1.87353	-0.038036	-0.0617468
TCGA-A2-A0SW-01	Positive	Negative	Negative	Luminal B	non-HER2A		0.793696	0.411612	3.66418	6.04555	2.27045	2.50135	-0.0737031	-0.155958
TCGA-A2-A0SX-01	Negative	Negative	Negative	Basal-like	non-HER2A	Negative	1.92539	0.938538	5.23337	1.35651	0.251398	0.571071	-0.566377	-0.273159
TCGA-A2-A0SY-01	Positive	Positive	Positive	Luminal A	HER2A		5.04047	2.71427	7.83867	6.26655	4.02228	3.83866	NA	NA
TCGA-A2-A0T0-01	Negative	Negative	Negative	Basal-like	non-HER2A	Negative	1.95623	1.10468	5.0824	0.707126	0.107176	0.90599	-0.253748	-0.40146
TCGA-A2-A0T2-01	Negative	Negative	Negative	Basal-like	non-HER2A	Positive	1.91111	0.644142	5.20627	0.39766	0.0844046	0.162901	-0.311696	-0.329659
TCGA-A2-A0T3-01	Positive	Positive	Negative	Luminal B	non-HER2A		3.28588	1.36848	5.93944	6.53026	5.18913	3.2377	-0.578434	-0.047133
TCGA-A2-A0T4-01	Positive	Positive	Negative	Luminal A	non-HER2A		1.84045	1.1223	6.18424	6.96155	4.34006	2.69622	0.0915679	-0.0225632
TCGA-A2-A0T5-01	Positive	Positive	Negative	Luminal A	non-HER2A		1.97265	1.02302	6.48468	5.54269	4.87728	2.16088	0.483635	0.111533
TCGA-A2-A0T6-01	Positive	Positive	Negative	Luminal A	non-HER2A		2.05913	1.10883	6.76881	4.34441	3.87125	4.44384	-0.0632351	0.0352238
TCGA-A2-A0T7-01	Positive	Positive	Negative	Luminal A	non-HER2A		2.81929	1.27783	6.03473	4.21143	1.61517	3.12608	-0.0605981	0.169317
TCGA-A2-A0YC-01	Positive	Positive	Negative	Luminal A	non-HER2A		4.46173	1.59101	7.05812	6.99897	5.97046	3.53888	-0.307699	0.371348
TCGA-A2-A0YD-01	Positive	Positive	Negative	Luminal A	non-HER2A		1.93153	1.01839	5.83802	6.59251	4.75369	3.15484	0.0838808	-0.0937058
TCGA-A2-A0YE-01	Negative	Negative	Negative	Basal-like	non-HER2A	Negative	3.48386	1.31876	5.80756	0.142839	0.114878	0.299198	-0.271936	-0.28576
TCGA-A2-A0YF-01	Positive	Negative	Negative	Luminal A	non-HER2A		2.09346	1.18187	5.99296	8.07915	2.69302	3.42235	-0.331777	0.665281
TCGA-A2-A0YG-01	Positive	Positive	Positive	Luminal B	HER2A		9.06477	2.84382	10.3012	6.32148	0.291953	4.74198	3.32082	2.7187
TCGA-A2-A0YH-01	Positive	Positive	Negative	Luminal B	non-HER2A		3.15169	1.07942	6.09666	6.36278	1.54243	2.95088	0.395154	-0.040223
TCGA-A2-A0YI-01	Positive	Positive	Negative	Luminal A	non-HER2A		1.96694	1.05866	5.79388	7.14784	3.79959	4.19108	-0.127254	-0.00135517
TCGA-A2-A0YJ-01	Positive	Negative	Negative	Basal-like	HER2A		10.0017	3.37192	8.99602	0.237133	0.0540829	0.0840611	1.26188	0.739679
TCGA-A2-A0YL-01	Positive	Positive	Negative	Luminal A	non-HER2A		1.49722	0.818637	5.31119	4.96603	4.98533	3.98644	-0.756804	-0.513166
TCGA-A2-A0YM-01	Negative	Negative	Negative	Basal-like	non-HER2A	Negative	3.97878	1.34139	5.36089	0.399489	0.0690581	0.0865335	-0.241211	-0.0179583
TCGA-A2-A0YT-01	Positive	Negative	Negative	Luminal B	non-HER2A		2.16954	0.798794	5.9315	6.85033	0.291514	1.24844	-0.205253	0.0730001
TCGA-A2-A1FV-01	Positive	Positive	Negative	Luminal A	non-HER2A		2.10418	0.992603	5.71727	6.763	0.709732	0.883497	NA	NA
TCGA-A2-A1FW-01	Positive	Negative	Negative	Luminal B	non-HER2A		-0.220604	-0.134523	4.91158	7.89117	0.394044	4.88918	NA	NA
TCGA-A2-A1FX-01	Positive	Positive	Negative	Luminal B	non-HER2A		2.97421	1.19967	5.60627	6.58199	3.70363	3.10178	NA	NA
TCGA-A2-A1FZ-01	Positive	Positive	Negative	Luminal A	non-HER2A		1.954	0.981178	6.3569	7.09518	4.73422	3.95043	NA	NA
TCGA-A2-A1G0-01	Positive	Positive	Negative	Luminal A	non-HER2A		2.76073	1.23077	7.35838	4.85111	4.53756	3.75646	NA	NA
TCGA-A2-A1G1-01	Negative	Negative	Positive	Basal-like	HER2A	Negative	9.00934	3.63489	10.6916	1.00846	0.269678	0.761178	NA	NA
TCGA-A2-A1G4-01	Positive	Positive	Negative	Luminal B	non-HER2A		2.08106	1.07924	5.12241	8.36638	3.94005	3.13233	NA	NA
TCGA-A2-A259-01	Positive	Positive	Negative	Luminal A	non-HER2A		1.2296	0.63767	5.06231	7.1142	4.77372	4.2769	NA	NA
TCGA-A2-A25C-01	Positive	Positive	Negative	Luminal B	non-HER2A		2.60974	1.05266	6.16888	4.7382	2.40112	4.41124	NA	NA
TCGA-A2-A25D-01	Positive	Negative	Negative	Luminal A	non-HER2A		1.9539	1.08557	6.49516	4.08734	0.122161	2.72487	NA	NA
TCGA-A2-A25E-01	Positive	Positive	Equivocal	Luminal B	non-HER2A		4.24554	1.56356	6.10236	5.92046	3.42645	1.4956	NA	NA
TCGA-A2-A25F-01	Negative	Positive	Negative	Basal-like	non-HER2A	Negative	1.82344	0.997256	3.41546	1.00111	0.330005	0.597584	NA	NA
TCGA-A2-A3KC-01	Positive	Positive	NA	Luminal A	non-HER2A		1.89727	1.03737	7.01565	5.98629	3.34748	3.63009	NA	NA
TCGA-A2-A3KD-01	Positive	Positive	NA	Luminal A	non-HER2A		1.86139	0.965066	6.39963	6.70661	3.56972	4.65016	NA	NA
TCGA-A2-A3XS-01	Negative	Negative	NA	Basal-like	non-HER2A	Negative	3.20204	1.05646	5.83928	0.226176	0.111272	0.0815091	NA	NA
TCGA-A2-A3XT-01	Negative	Negative	NA	Basal-like	non-HER2A	Negative	1.35787	0.574789	3.77565	3.00265	0.109151	0.124274	NA	NA
TCGA-A2-A3XU-01	Negative	Negative	NA	Basal-like	non-HER2A	Negative	2.25793	1.15208	5.14586	1.31974	0.062721	0.00662344	NA	NA
TCGA-A2-A3XV-01	Positive	Negative	NA	HER2E	non-HER2A		3.49661	1.8426	8.7159	0.0566453	0.0703171	1.68431	NA	NA
TCGA-A2-A3XX-01	Negative	Negative	NA	Basal-like	non-HER2A	Negative	2.93711	1.06424	6.09147	0.383627	0.181374	0.11599	NA	NA
TCGA-A2-A3XZ-01	Negative	Negative	NA	HER2E	HER2A	Positive	11.3866	4.12585	10.8004	0.621456	0.340894	0.976533	NA	NA
TCGA-A2-A3Y0-01	Positive	Negative	NA	Basal-like	non-HER2A		1.88265	0.7049	4.52188	2.3359	0.0430102	0.0996299	NA	NA
TCGA-A2-A4RW-01	Positive	Positive	NA	Luminal A	non-HER2A		2.10382	1.18771	6.5293	5.04334	3.5682	3.61055	NA	NA
TCGA-A2-A4RX-01	Positive	Positive	NA	Basal-like	non-HER2A		2.09537	0.93415	5.63079	1.08121	0.989972	0.693205	NA	NA
TCGA-A2-A4S0-01	Positive	Positive	NA	Luminal A	non-HER2A		1.89037	1.01745	5.24089	7.68205	6.14088	3.05733	NA	NA
TCGA-A2-A4S2-01	Positive	Positive	NA	Luminal A	non-HER2A		1.68529	0.833024	6.14945	5.34175	4.19958	2.22422	NA	NA
TCGA-A2-A4S3-01	Positive	Positive	NA	Luminal B	non-HER2A		1.36479	0.654196	5.55886	6.46021	2.89823	2.89467	NA	NA
TCGA-A7-A0CD-01	Positive	Positive	Negative	Luminal A	non-HER2A		5.87789	1.84402	7.20625	7.3448	5.45748	5.48688	0.777825	0.577199
TCGA-A7-A0CE-01	Negative	Negative	Negative	Basal-like	non-HER2A	Negative	3.06601	1.19833	6.15231	2.72006	0.566727	0.377103	0.269418	0.113394
TCGA-A7-A0CG-01	Positive	Negative	Negative	Luminal A	non-HER2A		0.968321	0.529451	5.77754	7.21689	1.3663	4.53741	-0.207019	0.0658743
TCGA-A7-A0CH-01	NA	NA	Negative	Luminal A	non-HER2A		1.94065	1.04503	6.18532	8.16162	5.30395	4.7639	0.263556	0.172723
TCGA-A7-A0CJ-01	Positive	Positive	Negative	Luminal B	non-HER2A		1.6241	0.547545	5.12646	7.24818	5.65808	2.71788	-0.436436	-0.388029
TCGA-A7-A0D9-01	Positive	Negative	Negative	Luminal A	non-HER2A		0.759338	0.381292	5.58947	5.88998	0.822768	0.702763	0.163197	-0.179339
TCGA-A7-A0DA-01	Negative	Negative	Negative	Basal-like	non-HER2A	Negative	1.98754	0.764487	5.55598	0.331673	0.182328	0.201936	-0.288404	0.0190226
TCGA-A7-A0DB-01	Positive	Positive	Negative	Luminal A	non-HER2A		1.9072	0.899682	6.24991	7.26613	4.81708	3.83863	0.150971	0.0614531
TCGA-A7-A13D-01	Negative	Positive	Negative	Basal-like	HER2A	Negative	5.40222	2.02163	6.70737	0.445995	0.509719	0.171381	0.568668	0.448984
TCGA-A7-A13E-01	Positive	Negative	Negative	Basal-like	non-HER2A		2.73828	1.05325	6.40957	1.2974	0.0894308	0.0549349	0.118023	-0.0295401
TCGA-A7-A13F-01	Positive	Positive	Negative	Luminal B	non-HER2A		4.70228	1.40542	6.8232	5.63467	4.15337	3.17368	0.550497	0.185244
TCGA-A7-A13G-01	Positive	Positive	Negative	Luminal A	non-HER2A		1.89883	1.00628	6.28072	8.23299	3.3826	4.32405	NA	NA
TCGA-A7-A13H-01	Positive	Positive	NA	Luminal A	non-HER2A		1.89314	1.06877	6.73806	6.15223	2.87338	3.33422	NA	NA
TCGA-A7-A26F-01	Negative	Negative	Negative	Basal-like	non-HER2A	Positive	1.70121	0.564436	5.2491	0.851779	0.147887	2.88622	NA	NA
TCGA-A7-A26G-01	Negative	Negative	Negative	Basal-like	non-HER2A	Negative	2.80406	0.787708	3.38779	0.734064	0.719108	1.93393	NA	NA
TCGA-A7-A26H-01	Positive	Negative	Positive	Luminal A	non-HER2A		3.35028	1.65601	6.6873	7.06568	5.26654	4.01384	NA	NA
TCGA-A7-A26I-01	Negative	Negative	Negative	Basal-like	non-HER2A	Negative	0.962399	0.498972	5.69065	0.85024	0.213645	1.00634	NA	NA
TCGA-A7-A2KD-01	Positive	Positive	NA	Luminal B	HER2A		9.57003	2.73174	10.0237	6.08059	3.91114	3.06887	NA	NA
TCGA-A7-A3IZ-01	Positive	Negative	NA	Luminal A	non-HER2A		3.55515	1.06284	6.59097	8.4119	0.200564	4.15976	NA	NA
TCGA-A7-A3J0-01	Positive	Positive	NA	Luminal A	non-HER2A		3.1191	1.44838	4.57798	7.42116	6.95876	3.57552	NA	NA
TCGA-A7-A3J1-01	Positive	Positive	NA	Luminal A	non-HER2A		2.84365	1.24729	6.69773	6.20215	0.491579	4.10988	NA	NA
TCGA-A7-A3RF-01	Positive	Positive	NA	Luminal A	non-HER2A		1.95042	1.0278	3.095	7.21675	0.280601	4.01212	NA	NA
TCGA-A7-A425-01	Positive	Positive	NA	Luminal A	non-HER2A		1.93897	0.823903	5.91807	5.98417	3.3081	1.56352	NA	NA
TCGA-A7-A426-01	Positive	Positive	NA	Luminal A	non-HER2A		0.941024	0.540252	5.57031	5.06317	4.24257	1.79498	NA	NA
TCGA-A7-A4SA-01	Positive	Negative	NA	Luminal A	non-HER2A		4.07022	1.11186	6.66026	5.4484	0.688949	2.75693	NA	NA
TCGA-A7-A4SB-01	Positive	Positive	NA	Luminal A	non-HER2A		3.77356	1.32459	7.01146	5.39501	1.58598	1.98116	NA	NA
TCGA-A7-A4SD-01	Negative	Negative	NA	Basal-like	non-HER2A	Negative	2.18666	0.896231	5.57179	0.512339	0.0498991	0.108023	NA	NA
TCGA-A7-A4SF-01	Positive	Negative	NA	HER2E	HER2A		7.05943	2.84747	8.45322	6.18844	0.16318	3.67225	NA	NA
TCGA-A7-A56D-01	Positive	Positive	NA	Luminal B	non-HER2A		1.46762	0.692317	6.11067	5.50902	1.26072	0.233503	NA	NA
TCGA-A7-A5ZV-01	Negative	Negative	NA	Basal-like	non-HER2A	Negative	3.06744	0.962322	6.39389	0.209001	0.039527	0.0192379	NA	NA
TCGA-A8-A06N-01	Positive	Negative	Negative	Luminal B	non-HER2A		4.84781	1.70167	6.76398	8.24913	0.0718027	2.4239	-0.0233876	0.197569
TCGA-A8-A06O-01	Positive	Positive	Negative	Luminal B	non-HER2A		3.43352	1.53032	6.28917	7.26856	4.47464	3.64334	NA	NA
TCGA-A8-A06P-01	Positive	Positive	Negative	Luminal A	non-HER2A		1.91763	1.0826	5.97408	5.49837	5.37077	2.91537	-0.439161	0.200923
TCGA-A8-A06R-01	Positive	Negative	Equivocal	Luminal B	non-HER2A		1.74111	0.586843	4.54316	6.75834	0.276464	2.09868	-0.694717	-0.312757
TCGA-A8-A06T-01	Positive	Positive	Negative	Luminal A	non-HER2A		3.34457	1.23174	6.72025	7.73953	5.21501	2.25244	NA	NA
TCGA-A8-A06U-01	Positive	Positive	Equivocal	Luminal A	non-HER2A		4.10943	1.63167	6.85593	7.17829	2.27588	3.10802	0.551974	0.212162
TCGA-A8-A06X-01	Positive	Negative	Positive	Luminal B	non-HER2A		1.93008	0.688423	6.32094	7.59888	0.141787	1.90799	-0.10247	-0.0232459
TCGA-A8-A06Y-01	Positive	Positive	Negative	Luminal A	non-HER2A		3.47922	1.09151	6.43352	8.00725	0.558647	2.03818	0.215817	0.144919
TCGA-A8-A06Z-01	Positive	Positive	Negative	Luminal B	non-HER2A		5.16832	1.52019	6.73991	6.96979	3.29258	4.13525	1.01702	0.374196
TCGA-A8-A075-01	Positive	Positive	Negative	Luminal B	non-HER2A		1.05621	0.506283	5.49801	4.01598	0.471552	4.01169	-0.285394	-0.17861
TCGA-A8-A076-01	Positive	Positive	Positive	Luminal B	HER2A		9.24679	2.64016	9.02714	5.01344	1.21602	4.54675	1.03044	0.831242
TCGA-A8-A079-01	Positive	Positive	Negative	Luminal B	non-HER2A		3.00283	0.897721	5.49647	7.83159	3.56127	3.72162	-0.688236	0.288662
TCGA-A8-A07B-01	Positive	Positive	Positive	Luminal B	HER2A		9.20941	2.70882	8.59901	5.73993	2.36622	4.56965	NA	NA
TCGA-A8-A07E-01	Positive	Positive	Negative	Luminal A	non-HER2A		1.0684	0.584319	5.15166	6.68674	1.01685	5.15621	-0.498046	0.0338687
TCGA-A8-A07F-01	Positive	Positive	Negative	Luminal A	non-HER2A		2.81783	1.03749	5.72439	6.03924	8.38411	5.5754	-0.206639	-0.285544
TCGA-A8-A07G-01	Positive	Positive	Negative	Luminal A	non-HER2A		2.31963	1.18356	6.87714	7.51137	2.58663	4.62381	NA	NA
TCGA-A8-A07I-01	Positive	Negative	Positive	HER2E	HER2A		9.31569	3.58319	10.108	6.71603	0.277049	4.56076	3.33526	3.72326
TCGA-A8-A07J-01	Positive	Positive	Negative	Luminal A	non-HER2A		1.95559	1.05255	6.24781	5.06488	3.24031	3.85389	NA	NA
TCGA-A8-A07L-01	Positive	Positive	Negative	Luminal B	non-HER2A		2.085	0.810885	5.98003	8.45983	2.01083	2.39923	NA	NA
TCGA-A8-A07O-01	Negative	Negative	Negative	Basal-like	non-HER2A	Negative	2.5466	1.37066	4.98876	2.13384	0.253044	0.761206	-0.63838	-0.159222
TCGA-A8-A07P-01	Positive	Positive	Positive	Luminal A	HER2A		8.4181	2.5571	8.2009	7.87019	2.70924	4.39333	0.544223	0.349663
TCGA-A8-A07R-01	Negative	Negative	Equivocal	Basal-like	non-HER2A	Negative	3.21754	1.34037	5.89406	0.175462	0.0323353	0.169767	-0.069668	0.140622
TCGA-A8-A07S-01	Positive	Negative	Negative	Luminal B	non-HER2A		1.9098	1.0064	6.14978	7.27777	1.93245	3.72554	0.0721637	-0.0418548
TCGA-A8-A07U-01	Negative	Positive	Negative	Basal-like	non-HER2A	Negative	1.39506	0.602197	5.99227	1.92381	0.318471	0.565896	NA	NA
TCGA-A8-A07W-01	Positive	Positive	Negative	Luminal B	non-HER2A		3.31398	1.07604	5.93251	7.90172	3.86059	3.07986	0.443243	0.223674
TCGA-A8-A081-01	Positive	Positive	Negative	Luminal B	non-HER2A		3.8151	1.44415	7.08229	7.2516	0.0742103	2.82431	0.906646	0.42116
TCGA-A8-A082-01	Positive	Positive	Negative	Luminal B	non-HER2A		1.93585	1.07554	5.59499	6.0265	3.76137	1.94426	0.226372	0.000654891
TCGA-A8-A083-01	Positive	Positive	Negative	Luminal A	non-HER2A		1.89342	0.998294	6.55079	8.31288	3.17776	3.997	0.957512	0.328002
TCGA-A8-A084-01	Positive	Negative	Negative	Luminal B	non-HER2A		-0.860036	-0.4459	5.77741	6.68264	0.150956	3.60042	-0.473332	-0.0139589
TCGA-A8-A085-01	Positive	Positive	Negative	Luminal B	non-HER2A		3.41184	1.0531	6.47379	7.07154	0.0908721	3.78912	-0.0292712	0.0583301
TCGA-A8-A086-01	Positive	Positive	Negative	Luminal A	non-HER2A		2.83552	1.42418	5.35497	6.86307	6.31168	3.03491	-0.32057	-0.243807
TCGA-A8-A08B-01	Positive	Negative	Positive	HER2E	HER2A		9.40369	2.81131	9.8399	4.97978	0.859	2.80377	NA	NA
TCGA-A8-A08C-01	Positive	Positive	Negative	Luminal A	non-HER2A		1.91728	0.86854	6.20859	7.9196	0.416209	5.16014	NA	NA
TCGA-A8-A08F-01	Positive	Positive	Negative	Luminal B	non-HER2A		3.30434	1.21661	5.90699	7.00228	1.20613	0.913377	NA	NA
TCGA-A8-A08G-01	Positive	Positive	Positive	Luminal B	non-HER2A		4.08283	1.32568	6.32399	6.88379	2.14828	2.91607	0.068927	-0.0102837
TCGA-A8-A08I-01	Positive	Positive	Negative	Luminal B	non-HER2A		2.44292	0.914194	4.96556	8.02305	4.43402	4.46517	NA	NA
TCGA-A8-A08J-01	Positive	Negative	Negative	HER2E	HER2A		7.69349	2.78768	10.1372	4.43867	1.72847	2.27843	3.07899	3.13219
TCGA-A8-A08L-01	Positive	Negative	Negative	HER2E	non-HER2A		2.70843	1.16942	6.65404	3.89655	0.033646	0.769793	-0.453614	1.60728e-05
TCGA-A8-A08O-01	Positive	Positive	Negative	Luminal A	non-HER2A		3.40078	1.18351	6.65821	5.37715	3.91584	3.07081	-0.0681265	0.215498
TCGA-A8-A08P-01	Positive	Positive	Positive	Luminal B	HER2A		5.3053	2.46294	6.76736	5.66597	1.65292	1.85258	-0.434574	-0.118467
TCGA-A8-A08R-01	Negative	Negative	Negative	Basal-like	HER2A	Negative	5.47187	2.01519	6.62286	0.428158	0.185451	0.555612	NA	NA
TCGA-A8-A08S-01	Positive	Positive	Positive	Luminal B	HER2A		11.3133	3.93819	8.6649	7.15269	2.43949	3.29023	NA	NA
TCGA-A8-A08T-01	Positive	Positive	Negative	Luminal A	non-HER2A		1.99705	1.00305	6.24025	6.8659	1.68633	2.49214	0.346001	0.220306
TCGA-A8-A08X-01	Negative	Negative	Positive	HER2E	HER2A	Positive	7.70933	2.54356	10.4929	1.08457	0.33497	2.62818	2.98426	2.62578
TCGA-A8-A08Z-01	Positive	Positive	Negative	Luminal A	non-HER2A		2.36594	0.954556	5.84695	5.24246	4.7589	3.36285	-0.181108	-0.0211084
TCGA-A8-A090-01	Positive	Positive	Negative	Luminal B	non-HER2A		3.74924	1.76862	6.80801	7.50373	4.64181	4.38016	NA	NA
TCGA-A8-A091-01	Positive	Negative	Negative	Luminal A	non-HER2A		2.55572	0.788852	6.27699	7.06778	0.186992	4.84688	0.0194667	-0.0446441
TCGA-A8-A092-01	Positive	Positive	Negative	Luminal B	non-HER2A		4.37357	1.4979	6.87012	5.03366	4.25924	4.21224	NA	NA
TCGA-A8-A093-01	Positive	Positive	Negative	Luminal A	non-HER2A		3.42963	1.11359	6.71636	7.46554	4.86269	3.84804	NA	NA
TCGA-A8-A094-01	Positive	Negative	Negative	HER2E	non-HER2A		1.25707	0.462837	5.53661	3.3957	1.03867	2.37101	-0.575992	-0.495526
TCGA-A8-A095-01	Positive	Positive	Negative	Luminal B	non-HER2A		1.652	0.842912	5.55701	6.78623	4.56095	4.22091	-0.568539	0.257389
TCGA-A8-A096-01	Positive	Positive	Negative	Luminal B	non-HER2A		2.1316	0.860012	5.79659	6.75515	1.18309	3.63231	NA	NA
TCGA-A8-A097-01	Positive	Positive	Positive	Luminal A	HER2A		8.05248	2.52558	8.14039	6.50357	3.54577	2.00663	NA	NA
TCGA-A8-A099-01	Positive	Positive	Positive	Luminal A	non-HER2A		3.71674	1.18795	6.65829	7.97719	4.42985	4.71607	1.06882	0.55931
TCGA-A8-A09A-01	Positive	Positive	Negative	Luminal A	non-HER2A		3.88053	1.42913	7.37416	6.26264	1.29191	2.3712	0.280606	0.272707
TCGA-A8-A09B-01	Positive	Positive	Negative	Luminal A	non-HER2A		3.87346	1.05812	6.42685	7.39897	6.55413	3.57846	0.356762	0.144997
TCGA-A8-A09C-01	Positive	Positive	Negative	Luminal B	non-HER2A		1.80968	0.635232	5.54562	7.31295	5.19166	3.42389	-0.286182	-0.30794
TCGA-A8-A09D-01	Positive	Positive	Negative	Luminal B	non-HER2A		0.888138	0.501531	5.45104	4.56936	0.480846	1.7008	NA	NA
TCGA-A8-A09G-01	Positive	Negative	Positive	HER2E	HER2A		7.39274	3.19197	8.87336	2.27687	0.0939553	5.38903	2.08431	1.93635
TCGA-A8-A09I-01	Positive	Positive	Positive	Luminal B	HER2A		10.2377	2.92233	10.8167	5.5518	0.103242	3.71776	4.14896	3.43365
TCGA-A8-A09K-01	Positive	Positive	Negative	Luminal B	non-HER2A		1.47246	0.51686	6.20851	8.15781	1.17287	2.23442	-0.00782583	0.0542876
TCGA-A8-A09M-01	Positive	Positive	Negative	Luminal B	non-HER2A		3.22354	1.03032	6.16012	6.99572	2.71261	2.12524	0.0636254	-0.00936905
TCGA-A8-A09N-01	Positive	Positive	Positive	Luminal B	non-HER2A		1.41017	0.525458	5.58986	7.08909	2.50772	4.75698	NA	NA
TCGA-A8-A09Q-01	Positive	Positive	Negative	Luminal B	non-HER2A		2.51674	0.897671	5.31384	7.49768	4.61516	5.50483	NA	NA
TCGA-A8-A09R-01	Positive	Positive	Negative	Luminal B	non-HER2A		3.9702	1.47938	6.92495	5.75087	0.611217	4.10782	0.668306	0.523893
TCGA-A8-A09T-01	Positive	Positive	Negative	Luminal A	non-HER2A		3.65362	1.10983	5.94196	6.35028	5.99985	3.53974	NA	NA
TCGA-A8-A09V-01	Positive	Positive	Negative	Luminal A	non-HER2A		1.94396	0.991882	5.87314	6.06072	5.60339	4.58911	NA	NA
TCGA-A8-A09W-01	Positive	Positive	Negative	Luminal B	non-HER2A		2.40551	0.940181	6.19722	6.51852	0.218162	4.52655	0.0743538	0.260131
TCGA-A8-A09X-01	Negative	Negative	Negative	HER2E	non-HER2A	Positive	1.60246	0.557673	5.95346	0.768358	0.146664	5.08405	-0.22201	-0.117687
TCGA-A8-A09Z-01	Positive	Negative	Negative	Luminal B	non-HER2A		2.43033	0.980537	6.77852	6.34503	0.0152264	2.77758	0.0874293	0.136458
TCGA-A8-A0A1-01	Positive	Positive	Negative	Luminal A	non-HER2A		2.19246	0.870524	5.83633	7.43349	2.55765	4.39059	NA	NA
TCGA-A8-A0A2-01	Positive	Positive	Negative	Luminal A	non-HER2A		1.63294	0.480306	6.08853	7.40635	4.37545	3.72872	NA	NA
TCGA-A8-A0A4-01	Positive	Positive	Negative	Luminal A	non-HER2A		2.07509	0.994928	6.30758	5.88284	3.39082	4.01358	-0.11738	0.111779
TCGA-A8-A0A6-01	Positive	Positive	Negative	Luminal A	non-HER2A		3.16757	1.31955	6.68643	5.07888	2.01515	2.59069	NA	NA
TCGA-A8-A0A9-01	Positive	Positive	Negative	Luminal A	non-HER2A		2.98234	1.08063	6.55229	7.24105	4.04805	4.12789	NA	NA
TCGA-A8-A0AB-01	Positive	Positive	Negative	Luminal A	non-HER2A		4.63915	1.32424	7.00491	7.71254	3.82491	5.11733	NA	NA
TCGA-A8-A0AD-01	Positive	Positive	Negative	Luminal A	non-HER2A		5.16019	1.56747	6.81807	7.57556	4.88299	4.17963	NA	NA
TCGA-AC-A23C-01	Positive	Positive	Positive	Luminal A	HER2A		6.661	3.52999	8.40057	7.42068	1.09204	4.03305	NA	NA
TCGA-AC-A23E-01	Positive	Positive	Negative	Luminal A	non-HER2A		3.10749	1.00899	5.926	5.0882	4.65852	4.35013	NA	NA
TCGA-AC-A23G-01	Positive	Positive	NA	Luminal A	non-HER2A		3.34248	1.14476	6.01146	5.15846	4.10232	1.91831	NA	NA
TCGA-AC-A23H-01	Positive	Negative	Positive	HER2E	HER2A		8.40967	2.73059	9.79899	1.58641	0.120182	4.41324	NA	NA
TCGA-AC-A2B8-01	Positive	Positive	NA	Luminal A	non-HER2A		1.96132	1.03355	5.81445	5.19795	5.51382	3.93483	NA	NA
TCGA-AC-A2BK-01	Negative	Negative	NA	Basal-like	non-HER2A	Negative	2.62211	0.85139	4.0731	0.0772165	0.0268846	0.0483603	NA	NA
TCGA-AC-A2BM-01	Positive	Positive	NA	Luminal B	non-HER2A		2.8822	0.920984	4.80341	5.1225	3.83284	3.54461	NA	NA
TCGA-AC-A2FB-01	Positive	Positive	NA	Luminal A	HER2A		4.72764	2.58494	9.39864	5.01745	3.22099	3.69029	NA	NA
TCGA-AC-A2FE-01	NA	NA	NA	Luminal A	non-HER2A		1.94621	1.00931	6.29094	4.89042	1.92051	2.43794	NA	NA
TCGA-AC-A2FG-01	Positive	Negative	NA	Luminal A	non-HER2A		1.90411	1.00393	6.30927	7.30439	1.38899	3.85762	NA	NA
TCGA-AC-A2FM-01	NA	NA	NA	Luminal A	non-HER2A		5.47948	1.71903	7.71446	7.58848	1.40648	3.71936	NA	NA
TCGA-AC-A2FO-01	Positive	Negative	NA	Luminal A	non-HER2A		2.04233	1.1347	6.79717	6.89414	0.925949	2.47658	NA	NA
TCGA-AC-A2QH-01	Negative	Negative	NA	Basal-like	non-HER2A	Negative	0.689252	0.26939	3.66371	0.160175	0.0204355	0.549224	NA	NA
TCGA-AC-A2QI-01	Positive	Negative	NA	Luminal A	non-HER2A		1.86664	1.02063	6.82181	5.92411	0.398924	2.77152	NA	NA
TCGA-AC-A2QJ-01	Negative	Negative	NA	Basal-like	non-HER2A	Negative	2.61442	1.16555	4.63103	0.317959	0	0.0459865	NA	NA
TCGA-AC-A3BB-01	Positive	Positive	NA	Luminal A	non-HER2A		2.52463	1.06868	5.98506	4.11743	3.14648	2.16566	NA	NA
TCGA-AC-A3HN-01	Positive	Positive	NA	Luminal A	non-HER2A		1.92852	1.00013	6.39427	6.3712	1.4729	2.99648	NA	NA
TCGA-AC-A3OD-01	Positive	Positive	NA	Luminal A	non-HER2A		1.78166	1.0363	6.10735	8.00027	4.54936	3.80858	NA	NA
TCGA-AC-A3QP-01	Positive	Positive	NA	Luminal A	non-HER2A		1.93223	1.03998	6.44013	3.10913	2.40536	0.74247	NA	NA
TCGA-AC-A3QQ-01	NA	NA	NA	Luminal A	HER2A		5.59319	2.89988	10.8046	5.58631	2.10725	0.47114	NA	NA
TCGA-AC-A3TM-01	NA	NA	NA	Luminal A	non-HER2A		2.05092	1.13948	6.49524	4.22634	4.2041	0.766894	NA	NA
TCGA-AC-A3TN-01	Positive	Positive	NA	Luminal A	non-HER2A		1.88893	1.03307	7.06347	7.06488	2.91143	0.808757	NA	NA
TCGA-AC-A3W5-01	NA	NA	NA	HER2E	HER2A		9.07116	3.05822	10.6641	2.18564	0.507535	1.67361	NA	NA
TCGA-AC-A3W6-01	Positive	Positive	NA	Luminal A	non-HER2A		2.6421	0.730614	5.16917	5.71963	0.370291	2.02535	NA	NA
TCGA-AC-A3W7-01	NA	NA	NA	Luminal A	non-HER2A		0.895163	0.537337	6.27478	6.30955	1.99046	3.70548	NA	NA
TCGA-AC-A3YJ-01	Positive	Positive	NA	Luminal A	non-HER2A		2.05952	1.05084	6.1183	6.52696	5.17946	0.935987	NA	NA
TCGA-AC-A5EH-01	NA	NA	NA	HER2E	non-HER2A		2.11775	0.713969	5.99442	2.18838	0.144401	2.67646	NA	NA
TCGA-AC-A62X-01	NA	NA	NA	Basal-like	non-HER2A		3.41892	1.05529	5.87509	0.363897	0.0315855	0.584692	NA	NA
TCGA-AN-A03X-01	Positive	Positive	Negative	Luminal A	non-HER2A		1.87905	1.02741	6.4178	6.80805	4.10649	2.48089	NA	NA
TCGA-AN-A03Y-01	Positive	Positive	Negative	Luminal B	non-HER2A		2.76945	0.913971	5.5052	6.90763	5.07238	2.78669	NA	NA
TCGA-AN-A041-01	Positive	Negative	Equivocal	Luminal A	non-HER2A		5.15318	1.59059	7.42071	5.77714	0.30914	4.1115	-0.266564	-0.0277495
TCGA-AN-A046-01	Positive	Positive	Negative	Luminal A	non-HER2A		1.59084	0.838316	6.14469	7.07302	5.99123	4.50608	NA	NA
TCGA-AN-A049-01	Positive	Positive	Negative	Luminal B	HER2A		6.17563	2.41371	7.1096	7.7126	3.76273	2.99353	0.136153	0.39381
TCGA-AN-A04A-01	Positive	Positive	Negative	Luminal A	non-HER2A		1.66992	0.605084	5.2265	5.29458	1.70118	2.56302	-0.00100785	-0.089762
TCGA-AN-A04C-01	Negative	Negative	Positive	HER2E	HER2A	Positive	8.08336	2.45542	10.573	2.37961	0.0768571	1.66935	NA	NA
TCGA-AN-A04D-01	Negative	Negative	Negative	Basal-like	non-HER2A	Negative	2.14394	1.11185	5.39925	0.176594	0.036062	0.0391708	-0.128764	-0.285716
TCGA-AN-A0AJ-01	Positive	Positive	Positive	Luminal B	non-HER2A		2.69858	0.939139	5.80571	6.48891	4.93299	2.99972	0.0403375	-0.0793462
TCGA-AN-A0AK-01	Positive	Negative	Negative	Luminal B	non-HER2A		3.54298	1.07622	6.75099	6.58247	0.126635	4.07417	-0.0604837	-0.202062
TCGA-AN-A0AL-01	Negative	Negative	Negative	Basal-like	non-HER2A	Negative	1.24525	0.546199	4.69743	0.600223	0.303766	0.320341	-0.0883429	-0.248535
TCGA-AN-A0AM-01	Positive	Negative	Negative	Luminal B	non-HER2A		0.602552	0.264294	4.72186	7.2478	0.161392	2.63718	-0.529256	-0.419901
TCGA-AN-A0AS-01	Positive	Negative	Negative	Luminal A	non-HER2A		2.32842	0.730476	5.39123	5.01057	0.264583	3.79738	-0.498061	-0.395156
TCGA-AN-A0AT-01	Negative	Negative	Negative	Basal-like	non-HER2A	Negative	1.72216	0.767565	4.16694	0.191138	0.0183281	0.0604299	-0.734262	-0.478718
TCGA-AN-A0FD-01	Positive	Positive	Positive	Luminal A	non-HER2A		1.88347	0.553997	5.34085	7.33583	1.1851	2.77382	-0.0237118	-0.281776
TCGA-AN-A0FF-01	Positive	Positive	Negative	Luminal B	non-HER2A		1.89083	0.96477	5.50321	5.53085	2.3783	3.04262	-0.228696	-0.418816
TCGA-AN-A0FJ-01	Positive	Negative	Negative	Basal-like	non-HER2A		0.816065	0.384961	4.82697	0.177464	0.058725	0.105791	-0.31989	-0.279269
TCGA-AN-A0FL-01	Negative	Negative	Negative	Basal-like	non-HER2A	Positive	0.676807	0.364277	5.27796	0.278324	1.37327	0.890877	0.0297577	-0.0238648
TCGA-AN-A0FN-01	Positive	Positive	Negative	Luminal A	non-HER2A		1.97252	1.00645	5.18272	5.45687	1.24194	1.93536	NA	NA
TCGA-AN-A0FS-01	Positive	Negative	Negative	Luminal A	non-HER2A		1.94625	1.04805	6.28092	7.34166	1.16133	3.90138	-0.0399397	-0.00244171
TCGA-AN-A0FT-01	Positive	Positive	Positive	Luminal A	HER2A		9.72871	2.95522	10.8678	5.40195	1.95755	0.261349	4.14081	3.02889
TCGA-AN-A0FV-01	Negative	Negative	Positive	HER2E	HER2A	Positive	7.09178	3.11063	10.7887	1.3582	0.153965	4.21933	3.21889	2.62037
TCGA-AN-A0FW-01	Positive	NA	Negative	Luminal B	non-HER2A		1.51224	0.474424	4.85991	7.43211	2.97569	4.55213	-0.736355	-0.215772
TCGA-AN-A0FX-01	Negative	Negative	Negative	Basal-like	non-HER2A	Negative	1.99046	0.656718	5.48547	1.61612	0.766365	0.695962	-0.370261	-0.00602304
TCGA-AN-A0FY-01	Positive	Positive	Negative	Luminal B	non-HER2A		1.9729	0.608957	5.23119	6.33293	5.62698	2.58834	-0.438311	-0.403298
TCGA-AN-A0FZ-01	Positive	Negative	Equivocal	Luminal A	non-HER2A		3.23167	1.30385	6.9901	6.20027	0.238438	3.2624	0.551825	0.163632
TCGA-AN-A0XL-01	Positive	Positive	Negative	Luminal A	non-HER2A		2.82231	1.48805	6.65247	6.58157	2.59414	2.70861	NA	NA
TCGA-AN-A0XN-01	Negative	Positive	Negative	Luminal A	non-HER2A	Negative	3.23427	1.12586	4.71157	4.66491	6.54725	2.79917	-0.655788	0.0349083
TCGA-AN-A0XO-01	Positive	Negative	Negative	Luminal A	non-HER2A		2.34933	1.19871	6.56418	7.08386	4.91798	3.80038	0.323356	0.0428299
TCGA-AN-A0XR-01	Positive	Negative	Negative	Luminal B	non-HER2A		0.686242	0.361626	5.03307	7.58	1.70385	3.21323	NA	NA
TCGA-AN-A0XS-01	Negative	Positive	Negative	Luminal A	non-HER2A	Positive	3.93277	1.17543	6.05396	6.37705	5.94086	3.29442	-0.05061	-0.11761
TCGA-AN-A0XT-01	Positive	Negative	Negative	Luminal A	non-HER2A		1.28483	0.454467	5.43188	8.20182	1.0776	3.61166	0.211182	0.0327307
TCGA-AN-A0XU-01	Negative	Negative	Negative	Basal-like	non-HER2A	Negative	3.37507	1.50466	5.67413	2.45793	0.0239368	0.428736	-0.207976	-0.229365
TCGA-AN-A0XV-01	Positive	Positive	Negative	Luminal A	non-HER2A		2.06289	1.11086	5.28046	7.54703	2.19027	2.94609	NA	NA
TCGA-AN-A0XW-01	Positive	Positive	Negative	Luminal A	non-HER2A		2.45437	1.07655	5.40257	4.74377	2.78506	2.98421	0.0431336	-0.139281
TCGA-AO-A03L-01	Positive	Positive	Negative	Luminal B	non-HER2A		4.85764	1.69052	6.78204	4.80443	1.30768	3.68996	-0.000263892	0.0519067
TCGA-AO-A03M-01	Positive	Positive	Negative	Luminal A	non-HER2A		2.58323	1.09348	7.00458	4.33268	2.91784	2.43623	0.396365	0.361275
TCGA-AO-A03N-01	Positive	Positive	Negative	Luminal B	non-HER2A		2.20291	0.727001	5.22404	5.16113	0.289315	2.57909	0.155556	-0.12706
TCGA-AO-A03O-01	Positive	Positive	Negative	Luminal B	non-HER2A		2.75842	0.881654	5.89168	6.89638	3.06104	3.95197	0.333143	0.0473891
TCGA-AO-A03P-01	Positive	Positive	Negative	Luminal B	non-HER2A		3.43322	1.45329	6.17272	7.08707	3.30692	2.47369	1.09184	0.314896
TCGA-AO-A03V-01	Positive	Positive	Negative	Luminal A	non-HER2A		0.862956	0.44753	5.68791	5.19925	4.09949	3.30218	NA	NA
TCGA-AO-A0J2-01	Negative	Negative	Negative	HER2E	non-HER2A	Positive	3.04338	0.988173	6.40095	0.856898	0.0504802	3.12583	0.0650893	-0.163066
TCGA-AO-A0J3-01	Positive	Positive	Negative	Luminal B	non-HER2A		2.52846	0.743711	5.01809	7.22292	2.46602	1.84173	-0.0902871	-0.380485
TCGA-AO-A0J4-01	Negative	Negative	Negative	Basal-like	non-HER2A	Negative	1.99758	0.659239	5.19479	0.306874	0.124486	0.274497	NA	NA
TCGA-AO-A0J5-01	Positive	Negative	Negative	Luminal A	non-HER2A		0.806595	0.441135	6.02552	6.08815	0.270269	1.36607	-0.204412	0.020537
TCGA-AO-A0J6-01	Negative	Negative	Negative	Basal-like	non-HER2A	Negative	2.13561	1.16769	5.29605	1.19211	0.0079583	0.015345	-0.454066	-0.461115
TCGA-AO-A0J7-01	Positive	Positive	Negative	Luminal B	non-HER2A		3.52285	1.44388	6.24341	7.5209	2.53094	4.17852	0.16524	-0.114311
TCGA-AO-A0J8-01	Positive	Positive	Negative	Luminal A	non-HER2A		2.00364	1.07895	6.5307	6.77848	3.86972	4.2393	0.140819	1.19772
TCGA-AO-A0J9-01	Positive	Positive	Negative	Luminal A	non-HER2A		2.65746	0.939988	4.65023	5.69576	2.38145	1.13003	-0.0649169	-0.0395287
TCGA-AO-A0JA-01	Positive	Positive	Negative	Luminal A	non-HER2A		1.00386	0.426768	5.60523	5.57983	1.68049	4.78103	NA	NA
TCGA-AO-A0JC-01	Positive	Positive	Negative	Luminal A	non-HER2A		1.88607	1.01564	3.33031	4.60841	1.21847	0.458906	-0.131262	-0.309045
TCGA-AO-A0JD-01	Positive	Positive	Negative	Luminal B	non-HER2A		0.984871	0.58209	5.54416	6.35947	3.02896	3.23756	0.0438145	-0.0844475
TCGA-AO-A0JE-01	Negative	Negative	Positive	HER2E	HER2A	Positive	5.66905	3.09968	8.70385	1.10883	0.208199	4.31184	2.34018	1.57571
TCGA-AO-A0JF-01	Positive	Positive	Negative	Luminal A	non-HER2A		1.82262	0.980988	6.06752	6.14905	3.27847	4.56722	-0.173192	0.0885828
TCGA-AO-A0JG-01	Positive	Positive	Negative	Luminal A	non-HER2A		0.906914	0.544253	5.82638	6.07886	0.894625	3.94826	0.292484	-0.0841588
TCGA-AO-A0JI-01	Positive	Negative	Negative	Luminal A	non-HER2A		3.27216	0.977985	6.60478	7.20342	0.55456	3.69788	-1.12481	-0.646901
TCGA-AO-A0JJ-01	Positive	Positive	Negative	Luminal A	non-HER2A		1.57579	0.904198	5.2655	6.91304	3.95779	3.54828	-0.417793	0.0463947
TCGA-AO-A0JL-01	Negative	Negative	Negative	Basal-like	HER2A	Negative	9.06612	3.05652	7.31734	1.33509	0.145239	0.217345	0.0469527	-0.000756781
TCGA-AO-A0JM-01	Positive	Positive	Positive	Luminal B	HER2A		9.79373	3.23212	9.02365	4.71533	0.650906	3.20933	0.234308	0.342725
TCGA-AO-A126-01	Positive	Positive	Negative	Luminal A	non-HER2A		2.9232	1.17939	5.86333	4.19668	0.786482	0.83007	0.70146	0.087828
TCGA-AO-A128-01	Negative	Negative	Negative	Basal-like	non-HER2A	Negative	1.70541	0.791722	5.64882	2.36094	0.0582417	0.152263	-1.32645	-0.465596
TCGA-AO-A129-01	Negative	Negative	Negative	Basal-like	non-HER2A	Negative	1.6796	0.699509	4.75303	1.15581	0.304192	0.191501	-0.0597964	-0.321331
TCGA-AO-A12A-01	Positive	Positive	Negative	Luminal A	non-HER2A		2.40169	1.00024	5.71853	5.52633	5.53031	2.49071	0.0873195	-0.105501
TCGA-AO-A12B-01	Positive	Positive	Negative	Luminal B	non-HER2A		3.89514	1.12752	5.20062	8.37414	5.82829	1.9592	0.346313	0.0108271
TCGA-AO-A12D-01	Negative	Negative	Positive	HER2E	HER2A	Positive	12.3618	4.16763	10.927	1.15023	0.338012	4.44265	3.45697	2.5774
TCGA-AO-A12E-01	Positive	Positive	Negative	Luminal A	non-HER2A		2.96239	1.46428	6.17973	5.28576	3.48675	3.31421	-0.0224274	-0.141193
TCGA-AO-A12F-01	Negative	Negative	Negative	Basal-like	non-HER2A	Negative	3.39483	1.30579	5.74293	0.249406	0.227505	1.10666	0.492843	0.0250513
TCGA-AO-A12G-01	Positive	Positive	Negative	Luminal A	non-HER2A		2.05512	1.08911	6.62943	6.4513	1.72606	4.19708	0.233809	0.141104
TCGA-AO-A1KP-01	Positive	Positive	Negative	Luminal B	non-HER2A		2.06828	1.11321	5.02549	7.06138	5.24093	1.47898	NA	NA
TCGA-AO-A1KQ-01	Positive	Positive	Negative	Luminal B	non-HER2A		4.45362	1.58852	5.69871	6.655	3.75918	1.05059	NA	NA
TCGA-AO-A1KR-01	Negative	Negative	NA	Basal-like	non-HER2A	Positive	2.35712	0.827394	6.28093	0.597954	0.156509	0.667563	NA	NA
TCGA-AO-A1KS-01	Positive	Positive	Negative	Luminal B	non-HER2A		3.94572	1.23786	5.59309	7.63329	6.11136	4.94775	NA	NA
TCGA-AO-A1KT-01	Positive	Positive	Negative	Luminal B	non-HER2A		3.52446	1.08786	6.0886	5.4058	2.28372	0.788798	NA	NA
TCGA-AQ-A04H-01	Positive	Positive	Positive	Luminal B	HER2A		7.14231	2.54688	8.2531	8.02145	0.199479	5.96302	NA	NA
TCGA-AQ-A04L-01	Positive	Negative	Positive	Luminal A	non-HER2A		2.54258	0.702917	6.23623	4.17335	0.26792	3.80924	-0.484141	0.417561
TCGA-AQ-A0Y5-01	Positive	Positive	Positive	Luminal A	HER2A		9.92664	3.48444	10.3356	3.32467	0.505165	3.70203	NA	NA
TCGA-AQ-A1H2-01	Positive	Positive	Positive	Luminal A	non-HER2A		3.56388	1.10003	6.49675	8.64001	0.760179	2.52173	NA	NA
TCGA-AQ-A1H3-01	Positive	Positive	Negative	Luminal A	non-HER2A		2.68732	1.26768	7.05456	6.54121	5.01336	3.43284	NA	NA
TCGA-AQ-A54N-01	Negative	Negative	NA	Basal-like	non-HER2A	Negative	1.23953	0.552599	4.91819	0.0728204	0.00362505	0.0104865	NA	NA
TCGA-AQ-A54O-01	Positive	Positive	NA	Luminal B	non-HER2A		1.8069	0.818534	5.71674	5.81253	2.51317	0.41485	NA	NA
TCGA-AR-A0TP-01	Positive	Negative	Negative	Basal-like	non-HER2A		1.07895	0.327743	4.78952	0.059083	0.0492973	0.12908	-0.401857	-0.567602
TCGA-AR-A0TQ-01	Positive	Negative	Positive	Luminal B	HER2A		9.93501	4.07199	9.91813	4.56201	0.148212	1.52451	1.82366	1.29719
TCGA-AR-A0TR-01	Positive	Positive	Negative	Luminal A	non-HER2A		2.02613	1.25578	6.41832	7.87424	5.65638	4.15536	0.239664	0.0597146
TCGA-AR-A0TS-01	Negative	Negative	Negative	Basal-like	non-HER2A	Negative	3.15241	1.31289	6.29807	0.500095	0.216674	0.410264	0.0360256	-0.213627
TCGA-AR-A0TT-01	Positive	Negative	Negative	Luminal B	non-HER2A		2.68925	0.830493	5.24121	5.33562	0.187259	2.18781	-0.277608	-0.441879
TCGA-AR-A0TU-01	Negative	Negative	Negative	Basal-like	non-HER2A	Negative	3.38216	0.909242	4.02208	1.74324	0.0226585	0.715993	-0.490853	-0.433492
TCGA-AR-A0TV-01	Positive	Positive	Negative	Luminal B	non-HER2A		2.81394	1.19177	5.06038	8.2988	4.1376	0.593536	-0.518644	-0.328314
TCGA-AR-A0TW-01	Positive	Positive	Negative	Luminal A	non-HER2A		2.94678	1.02551	6.34193	5.002	1.80199	2.06062	-0.438435	-0.271745
TCGA-AR-A0TX-01	Positive	Positive	Positive	HER2E	HER2A		6.96549	3.80949	10.4469	1.20681	0.276028	3.8045	2.43045	1.71878
TCGA-AR-A0TY-01	Positive	Negative	Negative	Luminal B	non-HER2A		1.40772	0.464454	5.54853	7.02312	0.181169	3.59635	-0.639567	-0.320053
TCGA-AR-A0TZ-01	Positive	Positive	Negative	Luminal A	non-HER2A		3.65713	1.27306	6.68324	6.08977	4.52843	5.82493	-0.541032	0.079776
TCGA-AR-A0U0-01	Negative	Negative	Negative	Basal-like	non-HER2A	Negative	2.74949	0.956856	5.47605	0.459242	0.140456	0.105851	-0.438859	-0.282833
TCGA-AR-A0U3-01	Positive	Positive	Negative	Luminal B	non-HER2A		1.634	0.550743	5.63459	7.81738	2.34044	4.85617	-0.0267943	-0.244169
TCGA-AR-A0U4-01	Negative	Negative	Negative	Basal-like	non-HER2A	Negative	1.16619	0.448562	3.9821	1.09539	0.0966698	0.184423	-1.18753	-0.0493247
TCGA-AR-A1AH-01	Positive	Negative	Negative	Basal-like	non-HER2A		1.05336	0.398731	6.0051	0.0659676	0.0456608	0.968344	0.0239126	-0.0419545
TCGA-AR-A1AI-01	Negative	Negative	Negative	Basal-like	non-HER2A	Negative	2.2239	0.805812	5.49456	2.39584	0.0360543	0.0974554	-0.426272	-0.187121
TCGA-AR-A1AJ-01	Positive	Negative	Negative	Basal-like	non-HER2A		2.75646	0.797905	4.17286	1.2018	0.0978215	0.534363	-1.10586	-0.118012
TCGA-AR-A1AK-01	Positive	Positive	Negative	Luminal A	non-HER2A		3.62948	1.79491	6.13163	5.36898	3.28726	3.20965	0.523946	0.542449
TCGA-AR-A1AL-01	Positive	Positive	Negative	Luminal A	non-HER2A		1.94669	1.04777	5.929	5.32482	5.15842	3.73356	-0.280729	-1.08675
TCGA-AR-A1AM-01	Positive	Positive	NA	Luminal A	non-HER2A		2.02156	1.08806	6.93433	4.70281	1.97023	3.02688	NA	NA
TCGA-AR-A1AN-01	Positive	Positive	Negative	Luminal A	non-HER2A		1.47901	0.596567	5.2124	5.44676	4.95753	3.44448	NA	NA
TCGA-AR-A1AP-01	Positive	Positive	Negative	Luminal A	non-HER2A		0.851184	0.488415	6.2709	6.09178	1.13672	3.50532	-0.295134	-0.160521
TCGA-AR-A1AQ-01	Negative	Negative	Negative	Basal-like	non-HER2A	Negative	0.939175	0.479201	5.43231	0.992389	0.0385462	0.261728	-0.455159	-0.36348
TCGA-AR-A1AR-01	Negative	Negative	Negative	Basal-like	non-HER2A	Negative	1.36889	0.610115	3.95003	1.97404	0.105696	0.278561	NA	NA
TCGA-AR-A1AS-01	Positive	Positive	Negative	Luminal B	non-HER2A		2.02047	0.998704	6.04916	6.56497	4.33217	3.46458	0.0208997	-0.178124
TCGA-AR-A1AU-01	Positive	Positive	Negative	Luminal A	non-HER2A		1.90941	1.00619	5.99205	5.3704	5.02834	3.41346	-0.519895	0.352095
TCGA-AR-A1AV-01	Positive	Positive	Negative	Luminal A	non-HER2A		3.5784	1.14345	6.50341	7.47336	4.26679	4.64211	0.336343	-1.20007
TCGA-AR-A1AX-01	Positive	Positive	Positive	Luminal A	non-HER2A		3.59221	1.89297	8.22719	4.99174	4.25126	3.41952	-0.645936	0.688242
TCGA-AR-A1AY-01	Negative	Negative	Negative	Basal-like	non-HER2A	Negative	1.12459	0.385158	5.10266	1.28923	0.352321	0.754893	-0.277243	-0.194189
TCGA-AR-A24H-01	Positive	Positive	Negative	Luminal B	non-HER2A		4.86712	1.58033	6.74472	6.28192	1.99556	1.82692	NA	NA
TCGA-AR-A24K-01	Positive	Positive	Negative	Luminal B	non-HER2A		3.68913	1.17883	6.04002	6.50035	5.12214	4.09845	NA	NA
TCGA-AR-A24L-01	Positive	Positive	Negative	Luminal A	non-HER2A		2.67445	1.60539	6.10917	6.08654	3.66758	3.68942	NA	NA
TCGA-AR-A24M-01	Positive	Positive	Negative	Luminal A	non-HER2A		1.85901	0.933478	6.11649	6.75742	4.94381	4.4968	NA	NA
TCGA-AR-A24N-01	Positive	Positive	Negative	Luminal B	non-HER2A		1.87544	0.956917	5.99268	7.4981	4.04997	4.63543	NA	NA
TCGA-AR-A24O-01	Positive	Positive	Negative	Luminal A	non-HER2A		1.90711	1.05957	5.21322	5.52013	4.7668	3.74192	NA	NA
TCGA-AR-A24P-01	Positive	Positive	Negative	Luminal A	non-HER2A		2.78653	1.52398	6.56117	6.39341	3.59398	3.66274	NA	NA
TCGA-AR-A24Q-01	Positive	Negative	Negative	Basal-like	non-HER2A		1.6811	0.585043	5.34984	1.50549	0.492724	0.974949	NA	NA
TCGA-AR-A24R-01	Positive	Positive	Negative	Luminal B	non-HER2A		2.83741	0.797078	5.45623	5.91371	2.50845	3.00295	NA	NA
TCGA-AR-A24S-01	Positive	Positive	Negative	Luminal B	non-HER2A		2.83528	0.920605	4.95443	6.4293	3.79572	5.312	NA	NA
TCGA-AR-A24T-01	Positive	Positive	Negative	Luminal A	non-HER2A		2.54809	1.13598	5.98188	5.87716	5.87617	4.42188	NA	NA
TCGA-AR-A24U-01	Negative	Negative	Positive	HER2E	HER2A	Positive	5.46605	2.8347	9.63344	1.52607	0.371866	3.67389	NA	NA
TCGA-AR-A24W-01	Positive	Positive	NA	Luminal A	non-HER2A		2.95745	0.975762	5.61677	6.40357	4.1745	2.93425	NA	NA
TCGA-AR-A24X-01	Positive	Positive	Negative	Luminal A	non-HER2A		1.86208	0.981251	6.53411	5.00337	5.37672	2.23787	NA	NA
TCGA-AR-A24Z-01	Positive	Positive	Negative	Luminal B	non-HER2A		3.90538	1.35947	5.22029	8.10065	3.89203	4.24867	NA	NA
TCGA-AR-A250-01	Positive	Negative	Positive	Luminal B	HER2A		10.722	3.427	9.00441	6.97797	0.421384	4.15958	NA	NA
TCGA-AR-A251-01	Positive	Negative	Negative	Basal-like	non-HER2A		2.68849	1.14239	4.61423	1.80724	0.138224	0.697447	NA	NA
TCGA-AR-A254-01	Positive	Positive	Positive	HER2E	HER2A		9.53175	3.31716	10.1127	3.6908	3.56702	2.08653	NA	NA
TCGA-AR-A255-01	Positive	Positive	Positive	Luminal A	non-HER2A		3.68526	1.44073	6.06398	6.4401	4.9787	4.34381	NA	NA
TCGA-AR-A256-01	Negative	Negative	Negative	Basal-like	non-HER2A	Negative	1.81202	0.696975	4.30821	0.323319	0.0631732	2.07708	NA	NA
TCGA-AR-A2LE-01	Positive	Negative	NA	Luminal A	non-HER2A		2.01541	1.08475	6.3576	7.2073	4.13273	4.2774	NA	NA
TCGA-AR-A2LJ-01	NA	NA	NA	Luminal A	HER2A		6.80108	3.71958	9.29493	3.9098	2.56324	0.779448	NA	NA
TCGA-AR-A2LL-01	Positive	Positive	NA	Luminal A	HER2A		4.9449	2.2962	7.28716	8.04448	5.26845	4.18196	NA	NA
TCGA-AR-A2LM-01	Positive	Positive	NA	Luminal A	non-HER2A		2.08435	1.12241	6.63192	5.49606	5.53334	4.36411	NA	NA
TCGA-AR-A2LN-01	Positive	Positive	NA	Luminal A	non-HER2A		1.93124	1.03945	5.90123	4.86901	1.51714	3.77764	NA	NA
TCGA-AR-A2LO-01	Positive	Positive	NA	Luminal A	non-HER2A		3.71841	1.06141	6.08989	4.86099	3.68478	3.05903	NA	NA
TCGA-AR-A2LR-01	Negative	Negative	NA	Basal-like	non-HER2A	Negative	1.81218	0.82093	5.27297	0.483105	0.254097	0.766733	NA	NA
TCGA-AR-A5QM-01	Positive	Positive	NA	Luminal A	non-HER2A		2.78074	0.902895	5.81553	6.41451	4.04072	2.92945	NA	NA
TCGA-AR-A5QP-01	Positive	Positive	NA	Luminal A	non-HER2A		2.284	1.20423	5.86194	6.18482	1.75346	1.3379	NA	NA
TCGA-B6-A0I1-01	Negative	Negative	NA	Basal-like	non-HER2A	Negative	5.08289	1.87145	5.98509	0.156571	0.00944113	0.23984	NA	NA
TCGA-B6-A0I2-01	NA	NA	Negative	Basal-like	non-HER2A		1.86262	0.705243	5.41856	3.52637	0.0890764	0.0129386	-0.681058	0.59928
TCGA-B6-A0I5-01	Positive	Positive	Negative	Luminal A	non-HER2A		1.96346	0.911517	6.87362	5.12655	3.1409	0.486947	NA	NA
TCGA-B6-A0I6-01	Negative	Negative	NA	Basal-like	non-HER2A	Negative	1.13508	0.570108	5.16224	0.172105	0.159056	0.242072	-0.735489	-0.467985
TCGA-B6-A0I9-01	NA	Positive	Positive	HER2E	HER2A		8.50735	2.96143	10.8583	6.42557	0.45407	1.12594	3.59774	3.31588
TCGA-B6-A0IA-01	Positive	Positive	Negative	Luminal B	non-HER2A		1.95329	0.965974	5.67269	6.09198	5.2202	1.21952	NA	NA
TCGA-B6-A0IB-01	Positive	Positive	Negative	Luminal B	non-HER2A		2.3258	0.796558	5.33521	7.04233	4.61573	3.07454	-0.53381	-0.630466
TCGA-B6-A0IC-01	Positive	Positive	Negative	Luminal A	non-HER2A		1.97995	1.06566	6.14198	7.86913	4.9086	3.89227	NA	NA
TCGA-B6-A0IE-01	Negative	Negative	Negative	Luminal A	non-HER2A	Positive	1.82504	0.916421	5.25892	4.66446	5.01563	1.20885	NA	NA
TCGA-B6-A0IG-01	Positive	Positive	NA	Luminal A	HER2A		7.90544	3.41334	10.0503	5.71893	1.45126	2.80418	1.82526	0.799946
TCGA-B6-A0IH-01	Positive	Positive	Negative	Luminal A	non-HER2A		1.27304	0.707291	5.94085	5.59384	3.46594	2.48542	NA	NA
TCGA-B6-A0IJ-01	Positive	Positive	Negative	Basal-like	non-HER2A		2.0819	0.713024	4.4919	1.71169	0.619325	0.0892429	-0.965981	-0.221033
TCGA-B6-A0IK-01	Negative	Negative	Negative	HER2E	non-HER2A	Positive	0.568154	0.259768	6.27436	3.59902	1.32256	1.53591	-0.555445	0.160433
TCGA-B6-A0IM-01	Positive	Positive	Negative	Luminal A	non-HER2A		2.01835	1.01375	6.63667	7.50232	1.02687	4.59247	NA	NA
TCGA-B6-A0IN-01	Positive	Negative	NA	Luminal B	non-HER2A		3.04747	1.58042	7.34312	6.19268	0.200872	0.952172	NA	NA
TCGA-B6-A0IO-01	Positive	NA	Negative	Luminal A	non-HER2A		2.1465	0.68607	5.50362	7.90567	2.00699	3.25558	-0.411762	-0.39075
TCGA-B6-A0IP-01	Positive	Positive	Negative	Luminal A	non-HER2A		1.87896	0.990147	6.4948	7.29853	3.44237	3.63953	NA	NA
TCGA-B6-A0IQ-01	Negative	Negative	Negative	Basal-like	non-HER2A	Negative	1.93325	0.689553	4.75773	0.163041	0.0281151	0.984502	-0.377566	-0.422614
TCGA-B6-A0RE-01	Negative	Negative	Negative	Basal-like	non-HER2A	Negative	1.92023	0.668436	4.98073	1.43095	0.118104	0.364306	NA	NA
TCGA-B6-A0RG-01	Negative	Negative	Negative	Luminal A	non-HER2A	Positive	2.70338	1.42459	6.55124	6.86871	3.67076	2.57061	-0.188674	-0.0613298
TCGA-B6-A0RH-01	Positive	Positive	Positive	HER2E	HER2A		5.65332	3.14094	8.14475	4.64812	2.63846	1.90823	1.88586	1.14113
TCGA-B6-A0RI-01	Positive	Positive	Negative	Luminal A	non-HER2A		1.99465	1.05167	5.5535	6.3479	5.874	3.50556	NA	NA
TCGA-B6-A0RL-01	Positive	Positive	Negative	Luminal B	non-HER2A		4.24923	1.31158	6.94369	7.89122	0.842898	2.13811	-0.146843	-0.195653
TCGA-B6-A0RM-01	Positive	Positive	Negative	Luminal A	non-HER2A		1.94715	0.993507	4.83416	8.09508	4.51091	3.18331	0.407462	-0.0460925
TCGA-B6-A0RN-01	Negative	Negative	Negative	Luminal A	non-HER2A	Positive	1.99964	1.09363	6.2078	6.09515	4.73669	3.11671	-0.3189	-0.159219
TCGA-B6-A0RO-01	Positive	Positive	Negative	Luminal A	non-HER2A		2.80693	1.01707	6.51075	7.60417	1.09276	3.70125	-0.768181	-0.437923
TCGA-B6-A0RP-01	Positive	Positive	Negative	Luminal A	non-HER2A		3.80112	1.10058	6.3997	7.66166	3.30293	4.10221	-0.0187803	0.0255571
TCGA-B6-A0RS-01	Negative	Negative	Negative	HER2E	non-HER2A	Positive	2.98763	1.26949	7.3655	0.241089	0.209945	2.65971	NA	NA
TCGA-B6-A0RT-01	Negative	Negative	Negative	Basal-like	non-HER2A	Negative	1.87219	1.00766	4.82792	0.895438	0.753704	0.506474	-0.999924	-0.0689736
TCGA-B6-A0RU-01	Negative	Negative	Negative	Basal-like	non-HER2A	Negative	2.87344	0.845185	5.05548	1.81168	1.25143	0.660165	-0.330632	-0.298638
TCGA-B6-A0RV-01	Positive	Positive	Negative	Luminal A	non-HER2A		1.02563	0.540756	5.47135	7.10995	5.20389	3.55813	-0.6934	-0.265784
TCGA-B6-A0WS-01	Positive	Positive	Negative	Luminal A	non-HER2A		2.01057	1.06006	5.41181	6.74961	3.65237	3.23928	NA	NA
TCGA-B6-A0WT-01	Positive	Positive	Negative	Luminal A	non-HER2A		2.10391	1.10869	5.81416	6.02941	5.49734	3.37248	NA	NA
TCGA-B6-A0WV-01	Positive	Positive	Negative	Luminal B	non-HER2A		1.69668	0.571869	5.20923	7.80649	2.89501	3.86432	NA	NA
TCGA-B6-A0WW-01	Positive	Positive	Negative	Luminal B	non-HER2A		3.07614	1.222	6.52766	7.76693	2.09835	2.4896	NA	NA
TCGA-B6-A0WX-01	Negative	Negative	Negative	Basal-like	non-HER2A	Negative	3.1226	1.34791	5.21672	0.381397	0.435006	0.33909	-0.511779	-0.169299
TCGA-B6-A0WY-01	Positive	Negative	Negative	Luminal A	non-HER2A		3.64186	1.40081	6.28506	4.44567	3.14762	2.26839	NA	NA
TCGA-B6-A0WZ-01	Positive	Positive	Negative	Luminal A	non-HER2A		2.01592	0.966557	6.19373	6.53504	4.73496	2.15796	NA	NA
TCGA-B6-A0X0-01	Positive	Positive	Negative	Luminal A	non-HER2A		1.99145	1.04998	6.75726	5.84676	4.30345	3.21086	-0.19413	-0.501979
TCGA-B6-A0X1-01	Negative	Negative	NA	Basal-like	non-HER2A	Negative	4.03762	1.38283	5.79109	3.00906	0.113388	0.865176	-0.74444	-0.545
TCGA-B6-A0X4-01	Positive	Positive	Negative	Luminal A	non-HER2A		2.02755	1.09129	5.40235	6.78314	4.28647	1.93364	NA	NA
TCGA-B6-A0X5-01	Positive	Positive	Negative	Luminal B	non-HER2A		2.09512	1.1828	5.03103	7.5158	4.37371	2.21657	NA	NA
TCGA-B6-A0X7-01	Positive	Positive	Negative	Luminal A	non-HER2A		2.65197	1.02006	6.39708	6.28541	1.983	2.85745	NA	NA
TCGA-B6-A1KC-01	Positive	Negative	NA	Luminal B	non-HER2A		4.28038	1.38982	5.40599	6.38262	0.146248	3.46714	NA	NA
TCGA-B6-A1KF-01	Negative	Negative	Positive	Basal-like	HER2A	Positive	7.93276	2.76141	8.66484	2.25613	0.0675705	0.308427	NA	NA
TCGA-B6-A1KI-01	Positive	Positive	Negative	Luminal A	non-HER2A		3.40216	1.06705	6.75024	7.58691	2.62746	3.34399	NA	NA
TCGA-B6-A1KN-01	Negative	Negative	Positive	Luminal B	HER2A	Positive	10.1746	2.99271	10.2319	5.85433	0.31094	0.40856	NA	NA
TCGA-B6-A3ZX-01	NA	NA	NA	Basal-like	non-HER2A		2.66601	0.913077	4.65426	0.915145	0.150549	1.18249	NA	NA
TCGA-B6-A400-01	NA	NA	NA	Basal-like	non-HER2A		1.71946	0.824415	5.3088	0.164829	0.234233	0.0576709	NA	NA
TCGA-B6-A402-01	NA	NA	NA	Basal-like	non-HER2A		3.77146	1.31251	5.467	0.39549	0.0416074	0.00581707	NA	NA
TCGA-B6-A408-01	NA	NA	NA	Luminal A	non-HER2A		3.25571	1.05711	6.10204	7.14274	2.73726	1.96482	NA	NA
TCGA-B6-A409-01	NA	NA	NA	Basal-like	non-HER2A		1.14616	0.657676	5.45038	1.0552	0.464729	0.0776055	NA	NA
TCGA-B6-A40C-01	NA	NA	NA	Luminal A	non-HER2A		1.96172	1.05586	6.39115	3.69662	3.82145	1.86299	NA	NA
TCGA-BH-A0AU-01	Positive	Positive	Negative	Luminal B	non-HER2A		2.69349	1.25074	6.56244	6.07717	4.21481	3.76917	-0.249933	-0.0534482
TCGA-BH-A0AW-01	Positive	Negative	Positive	HER2E	HER2A		10.8564	3.405	10.1728	1.67052	0.178937	1.51795	NA	NA
TCGA-BH-A0AY-01	Positive	Positive	Negative	Luminal B	non-HER2A		2.12193	0.678218	5.12538	5.2144	3.19612	3.19441	-1.15901	-0.169744
TCGA-BH-A0B0-01	Positive	Positive	Negative	Luminal A	non-HER2A		1.00273	0.566095	5.16462	5.37867	0.844282	3.51693	-0.557068	-0.0829344
TCGA-BH-A0B1-01	Positive	Positive	Negative	Luminal A	non-HER2A		3.63425	1.14315	5.76269	7.07065	5.34147	3.02316	-0.0243712	-0.0673637
TCGA-BH-A0B3-01	Negative	Negative	Negative	Basal-like	non-HER2A	Negative	1.93336	0.78083	5.35636	0.982711	1.1711	0.296689	-0.453938	-0.175576
TCGA-BH-A0B4-01	Positive	Positive	Positive	Luminal A	non-HER2A		3.41931	1.96202	7.06332	5.81467	2.70636	2.08942	0.248306	0.205053
TCGA-BH-A0B5-01	Positive	Positive	Negative	Luminal B	non-HER2A		3.14911	0.884637	6.14108	4.62353	2.52754	4.61798	-0.698481	0.110471
TCGA-BH-A0B6-01	Positive	Positive	NA	Luminal A	non-HER2A		1.90575	0.608969	5.17305	5.94227	0.257994	2.89035	NA	NA
TCGA-BH-A0B8-01	Positive	Positive	Negative	Luminal A	non-HER2A		2.54947	1.24209	6.45957	7.53564	1.62728	4.76353	NA	NA
TCGA-BH-A0B9-01	Negative	Negative	Negative	Basal-like	non-HER2A	Negative	1.14583	0.49461	3.83963	0.258924	0.026749	0.440308	-0.748687	-0.770068
TCGA-BH-A0BA-01	Positive	Positive	Negative	Luminal A	non-HER2A		1.58701	0.60089	6.20469	6.16761	1.38965	3.90009	-0.229102	0.323737
TCGA-BH-A0BC-01	Positive	Positive	Negative	Luminal A	non-HER2A		0.882505	0.49835	4.6706	7.01713	2.16405	3.37272	-0.688035	-0.254038
TCGA-BH-A0BD-01	Positive	Positive	Negative	Luminal B	non-HER2A		1.99799	0.987592	5.47211	5.21	6.52926	3.10441	NA	NA
TCGA-BH-A0BF-01	Positive	Positive	Negative	Luminal B	non-HER2A		0.756311	0.447004	4.93282	3.69874	2.13382	3.15882	-0.444046	-0.315202
TCGA-BH-A0BG-01	Negative	Negative	Negative	Basal-like	non-HER2A	Negative	2.16138	1.03603	5.33333	0.426833	0.0797914	0.0840105	NA	NA
TCGA-BH-A0BJ-01	Positive	Positive	Negative	Luminal A	non-HER2A		2.84811	1.0955	6.23791	5.38155	4.3723	3.94778	-0.0796287	0.0455817
TCGA-BH-A0BL-01	Negative	Negative	Negative	Basal-like	non-HER2A	Negative	3.21074	0.92964	4.99855	0.835663	0.51802	1.29839	NA	NA
TCGA-BH-A0BM-01	Positive	Negative	Negative	Luminal A	non-HER2A		1.83656	0.988488	5.91806	5.42617	1.0486	2.19559	0.241737	-0.101672
TCGA-BH-A0BO-01	Positive	Positive	Negative	Luminal A	non-HER2A		1.89488	1.01988	5.94605	6.25922	2.97981	4.00139	-0.245987	-0.307838
TCGA-BH-A0BP-01	Positive	Positive	Negative	Luminal A	non-HER2A		0.803861	0.324324	4.89293	6.44662	0.59637	2.56554	-0.776528	-0.288
TCGA-BH-A0BQ-01	Positive	Positive	Negative	Luminal A	non-HER2A		2.03189	1.02029	6.68386	5.11268	3.04016	2.96411	0.717921	0.442263
TCGA-BH-A0BR-01	Positive	Positive	Negative	Luminal A	non-HER2A		1.36122	0.631932	5.7681	3.49301	0.275447	4.13267	-0.387896	-0.258907
TCGA-BH-A0BS-01	Positive	Positive	Negative	Luminal A	non-HER2A		1.95716	0.983012	6.82936	8.15226	2.88048	4.54459	1.22512	0.537469
TCGA-BH-A0BT-01	Positive	Positive	Negative	Luminal A	non-HER2A		3.82084	1.19837	7.1934	5.68179	4.62081	1.75986	0.0398488	0.236797
TCGA-BH-A0BV-01	Positive	Positive	Negative	Luminal A	non-HER2A		3.24107	1.06934	5.84088	7.18444	4.45078	4.34116	0.058512	-0.269971
TCGA-BH-A0BW-01	Negative	Negative	Negative	Basal-like	non-HER2A	Negative	4.48304	1.86707	5.92803	1.64674	0.057163	0.159886	-0.274003	-0.324477
TCGA-BH-A0BZ-01	Positive	Positive	Negative	Luminal B	non-HER2A		3.65461	1.603	6.00857	5.62633	0.284182	0.912741	-0.197977	-0.119162
TCGA-BH-A0C0-01	Positive	Positive	Positive	Luminal B	non-HER2A		3.1218	1.18171	6.61873	6.4025	1.86042	3.49991	0.564764	0.258335
TCGA-BH-A0C1-01	Positive	Positive	Negative	Luminal A	non-HER2A		2.84956	0.87955	6.19472	5.81697	4.39455	4.60268	-0.396632	0.562596
TCGA-BH-A0C3-01	Positive	Negative	Negative	Luminal B	non-HER2A		4.64245	1.41056	5.84576	4.86424	1.23763	4.19595	0.0503767	0.0161104
TCGA-BH-A0C7-01	Positive	Negative	Positive	Luminal B	non-HER2A		4.47826	1.86556	6.67902	7.50346	0.762586	4.03903	-0.0144366	-0.0988872
TCGA-BH-A0DD-01	Positive	Positive	Positive	Luminal B	HER2A		8.24587	2.82411	8.45524	6.99866	6.00106	3.50934	1.81389	1.04318
TCGA-BH-A0DE-01	Positive	Positive	Negative	Luminal A	non-HER2A		2.88929	1.68553	6.76073	5.67232	2.72615	2.59897	NA	NA
TCGA-BH-A0DG-01	Positive	Negative	Negative	Luminal A	non-HER2A		0.830035	0.416897	5.3934	4.90462	0.724623	3.20285	-0.586418	-0.323011
TCGA-BH-A0DH-01	Positive	Positive	Negative	Luminal A	non-HER2A		3.7242	1.19004	6.56798	6.47773	3.34974	2.78822	0.060626	0.083479
TCGA-BH-A0DI-01	Positive	Positive	Negative	Luminal A	non-HER2A		1.90594	0.988421	6.38592	4.72842	1.75953	4.07526	-0.0392535	0.0627055
TCGA-BH-A0DK-01	Positive	Positive	Negative	Luminal A	non-HER2A		0.833166	0.484611	4.81861	5.30856	3.29528	2.59812	-0.414225	-0.322878
TCGA-BH-A0DO-01	Positive	Positive	Negative	Luminal A	non-HER2A		1.81425	0.884361	6.2146	7.66754	4.23623	4.23399	NA	NA
TCGA-BH-A0DP-01	Positive	Positive	Negative	Luminal A	non-HER2A		2.70581	0.89297	5.86479	6.73776	5.27073	3.57883	-1.04801	-0.1798
TCGA-BH-A0DQ-01	Positive	Positive	Negative	Luminal A	non-HER2A		1.91896	1.04924	5.30672	5.34985	3.74074	2.25875	NA	NA
TCGA-BH-A0DS-01	Positive	Positive	Negative	Luminal A	non-HER2A		2.0116	0.851513	6.17151	6.19253	3.38627	1.81069	0.0758214	-0.0926361
TCGA-BH-A0DT-01	Positive	Positive	Negative	Luminal A	non-HER2A		1.86651	0.880485	6.33356	5.74776	4.98527	3.29539	0.00435771	-0.369152
TCGA-BH-A0DV-01	Positive	Positive	Negative	Luminal A	non-HER2A		1.9207	1.05045	6.11557	5.65091	1.97376	3.34872	0.198405	-0.0889543
TCGA-BH-A0DX-01	Positive	Positive	Negative	Luminal A	non-HER2A		2.79898	0.764598	4.83464	7.02392	0.532307	3.96207	NA	NA
TCGA-BH-A0DZ-01	Positive	Positive	Positive	HER2E	HER2A		8.01726	3.39371	8.71104	3.77357	1.72032	3.77655	NA	NA
TCGA-BH-A0E0-01	Negative	Negative	Negative	Basal-like	non-HER2A	Positive	1.91699	0.717379	5.443	1.98588	0.155586	0.495128	-0.0629589	-0.206449
TCGA-BH-A0E1-01	Positive	Positive	Negative	Luminal A	non-HER2A		1.91903	0.995213	5.53575	6.17031	6.71231	3.18204	-0.601874	-0.146396
TCGA-BH-A0E2-01	Positive	Positive	Negative	Luminal A	non-HER2A		0.83922	0.473783	4.98768	5.95528	2.6592	1.84238	-0.274206	-0.215211
TCGA-BH-A0E6-01	Negative	Negative	Negative	Basal-like	non-HER2A	Negative	2.47934	0.923853	5.66563	1.92992	0.275951	0.285638	-0.572771	-0.702205
TCGA-BH-A0E7-01	Positive	Positive	Negative	Luminal A	non-HER2A		1.95984	1.01611	6.19189	7.44157	7.36471	4.41478	0.270066	0.109724
TCGA-BH-A0E9-01	Positive	Positive	Negative	Luminal A	non-HER2A		2.5781	1.11287	6.48339	6.97326	3.83389	3.49287	-0.0552705	0.142408
TCGA-BH-A0EA-01	Positive	Positive	Negative	Luminal A	non-HER2A		1.93985	0.958852	6.54386	6.27425	1.63435	2.05734	-0.114566	0.109959
TCGA-BH-A0EB-01	Positive	Positive	Negative	Luminal A	non-HER2A		3.30096	0.98685	5.95866	7.76339	2.94647	3.85855	-0.0710558	-0.0388742
TCGA-BH-A0EE-01	Negative	Negative	Positive	HER2E	HER2A	Positive	11.0974	2.90646	8.61904	1.6337	0.0279347	0.647943	2.05205	1.34904
TCGA-BH-A0GY-01	Positive	Positive	Negative	Luminal A	non-HER2A		2.6069	0.792076	5.5507	4.89404	5.45315	2.5798	-0.407774	-0.229739
TCGA-BH-A0GZ-01	Positive	Positive	Negative	Luminal A	non-HER2A		2.55997	1.03284	5.86428	7.1886	3.66745	1.43051	NA	NA
TCGA-BH-A0H0-01	Positive	Positive	Negative	Luminal B	non-HER2A		3.38489	0.966209	6.20112	6.54232	0.337418	4.25472	NA	NA
TCGA-BH-A0H3-01	Positive	Positive	Negative	Luminal A	non-HER2A		1.90273	0.970841	6.12886	5.79229	3.33236	2.94512	NA	NA
TCGA-BH-A0H5-01	Positive	Positive	Negative	Luminal A	non-HER2A		2.05012	1.08092	5.83252	5.38641	2.31239	3.35658	-0.192977	-0.18446
TCGA-BH-A0H6-01	Positive	Positive	Negative	Luminal A	non-HER2A		1.89503	0.951568	5.84645	6.24668	7.07465	3.02076	-1.08224	-0.133168
TCGA-BH-A0H7-01	Positive	Positive	Negative	Luminal A	non-HER2A		3.83007	1.20126	5.64176	5.83625	3.9587	2.23752	-0.355028	0.400912
TCGA-BH-A0H9-01	Positive	Positive	Negative	Luminal A	non-HER2A		3.65037	1.00917	6.04774	7.20902	1.42324	3.2343	-0.217545	-0.282885
TCGA-BH-A0HA-01	Positive	Positive	Negative	Luminal A	non-HER2A		2.03455	1.13038	5.9701	4.56318	2.9519	2.3311	-0.292691	-0.266713
TCGA-BH-A0HB-01	Positive	Positive	Negative	Luminal A	non-HER2A		1.05432	0.567748	5.74954	7.82746	3.10608	1.10522	NA	NA
TCGA-BH-A0HI-01	Positive	Positive	Negative	Luminal A	non-HER2A		1.86329	0.966051	6.15791	7.27781	3.69541	3.61727	NA	NA
TCGA-BH-A0HK-01	Positive	Negative	Negative	Luminal A	non-HER2A		1.87873	0.990028	6.3033	6.48653	0.160989	3.32989	0.340189	-0.0705128
TCGA-BH-A0HN-01	Positive	Positive	Negative	Luminal A	non-HER2A		1.79202	0.812226	6.84658	7.41281	2.47352	2.69231	-0.336997	-0.0783178
TCGA-BH-A0HO-01	Positive	Positive	Negative	Luminal A	non-HER2A		1.99332	1.03374	5.8653	5.73959	4.71513	4.44161	NA	NA
TCGA-BH-A0HP-01	Positive	Negative	Negative	Luminal A	non-HER2A		1.03356	0.565122	5.76925	6.48622	0.847138	4.32281	-0.437872	-0.137409
TCGA-BH-A0HU-01	Positive	Positive	Negative	Luminal B	non-HER2A		3.0369	1.33206	6.07684	5.9541	2.09348	2.05412	0.242905	0.242795
TCGA-BH-A0HW-01	Positive	Negative	Negative	Luminal B	HER2A		7.2653	2.24252	7.29596	7.8024	0.077303	3.51692	0.944094	0.291098
TCGA-BH-A0HX-01	Positive	Positive	Negative	Luminal A	non-HER2A		2.57268	0.848811	6.03826	6.01663	1.33263	2.85907	0.155944	-0.12055
TCGA-BH-A0HY-01	Positive	Negative	NA	Luminal B	HER2A		8.73439	2.99142	10.4932	5.9288	0.300878	3.32917	1.00107	1.13683
TCGA-BH-A0RX-01	Negative	Negative	Negative	Basal-like	non-HER2A	Negative	3.37286	1.22213	4.9925	2.80841	0.997358	0.727096	-0.636993	0.752528
TCGA-BH-A0W3-01	Positive	Positive	Negative	Luminal B	non-HER2A		2.66046	1.35746	6.76252	7.77378	3.65213	5.1416	NA	NA
TCGA-BH-A0W4-01	Positive	Positive	Negative	Luminal A	non-HER2A		2.06782	1.14886	6.29229	5.05802	5.76302	4.50229	-0.0701637	-0.00576695
TCGA-BH-A0W5-01	Positive	Positive	Negative	Luminal A	non-HER2A		2.10565	1.09199	5.45511	6.40976	4.65121	3.15163	-0.0978552	-0.0517693
TCGA-BH-A0W7-01	Positive	Positive	Negative	Luminal A	non-HER2A		3.08273	1.00095	5.20835	3.7314	1.56479	2.50294	NA	NA
TCGA-BH-A0WA-01	Negative	Negative	Negative	Basal-like	non-HER2A	Negative	2.26218	0.819682	5.19915	0.345986	0.142718	0.179034	NA	NA
TCGA-BH-A18F-01	Positive	Positive	Negative	Luminal A	non-HER2A		1.0092	0.382017	4.99977	4.95477	1.16274	4.37154	-0.237654	-0.532104
TCGA-BH-A18G-01	Negative	Negative	Negative	Basal-like	non-HER2A	Negative	2.05074	0.719847	4.33283	0.388233	0.082637	0.0580062	-0.703666	-0.635066
TCGA-BH-A18H-01	Positive	Positive	Negative	Luminal A	non-HER2A		1.83444	0.628274	5.38226	6.47814	3.72956	3.19137	-0.875001	-0.338424
TCGA-BH-A18I-01	Positive	Positive	Negative	Luminal A	non-HER2A		3.1606	0.902185	5.47598	5.52487	2.47348	3.07066	NA	NA
TCGA-BH-A18J-01	Positive	Positive	Negative	Luminal B	non-HER2A		0.810907	0.486638	5.88196	5.15235	1.28955	2.8515	-0.565915	-0.303657
TCGA-BH-A18K-01	Positive	Positive	Negative	Luminal A	non-HER2A		3.02696	1.0043	5.66302	5.53104	2.46583	2.13794	NA	NA
TCGA-BH-A18L-01	Positive	Positive	NA	Luminal B	non-HER2A		6.06811	1.75652	6.92818	7.07313	2.91726	3.41635	0.139083	0.257808
TCGA-BH-A18M-01	Positive	Positive	Positive	Luminal A	non-HER2A		1.9872	0.952537	5.60273	5.64155	5.63911	3.75763	-0.55891	-0.668032
TCGA-BH-A18N-01	Positive	Positive	Negative	Luminal A	non-HER2A		3.94348	1.19788	6.3475	7.91272	6.65612	4.00744	0.29116	-0.0247979
TCGA-BH-A18P-01	Positive	Negative	Negative	HER2E	non-HER2A		3.78007	1.34828	6.84117	3.81999	0.166845	3.73517	0.389276	0.329339
TCGA-BH-A18Q-01	Negative	Negative	Negative	Basal-like	non-HER2A	Negative	1.75982	0.627534	5.20277	2.52715	1.08487	1.15162	-0.169086	-0.26502
TCGA-BH-A18R-01	NA	Negative	Positive	HER2E	HER2A		6.52849	3.22858	8.6968	3.34143	0.338205	3.66106	2.08073	2.00975
TCGA-BH-A18S-01	Positive	Positive	NA	Luminal A	non-HER2A		2.836	1.49448	6.92462	7.16365	3.76103	4.32295	1.06783	0.343626
TCGA-BH-A18T-01	Negative	Negative	Negative	Basal-like	non-HER2A	Negative	2.78806	0.954875	5.8968	1.118	0.0739658	0.151013	-0.0173907	-0.435851
TCGA-BH-A18U-01	Positive	Positive	Positive	Luminal B	HER2A		8.92882	3.00947	10.218	6.31201	2.87878	2.14509	0.814784	-0.184147
TCGA-BH-A18V-01	Negative	Negative	Negative	Basal-like	non-HER2A	Negative	2.05778	1.01765	5.66905	1.11181	0.140739	0.1629	-0.0183708	0.00926273
TCGA-BH-A18V-06	Negative	Negative	Negative	Basal-like	non-HER2A	Negative	2.90995	1.41846	5.7299	0.407432	0.0237049	1.87481	NA	NA
TCGA-BH-A1EN-01	Negative	Negative	Positive	HER2E	non-HER2A	Positive	5.70997	1.82458	10.8207	1.45594	0.0979327	2.95221	NA	NA
TCGA-BH-A1EO-01	Positive	Positive	Negative	Luminal A	non-HER2A		3.04069	0.938543	5.39796	6.37236	7.16852	3.65572	NA	NA
TCGA-BH-A1ES-01	Positive	Positive	Negative	Luminal A	non-HER2A		2.72015	0.800095	6.0584	6.24513	2.66824	3.02989	NA	NA
TCGA-BH-A1ET-01	Positive	Positive	Negative	Luminal A	non-HER2A		2.00049	1.06015	5.96325	7.43558	5.03826	5.08263	NA	NA
TCGA-BH-A1EU-01	Positive	Positive	Negative	Luminal A	non-HER2A		1.81626	0.732783	4.57878	7.48801	5.68342	4.16285	NA	NA
TCGA-BH-A1EV-01	Positive	Positive	NA	HER2E	HER2A		10.0759	3.06144	9.96238	5.89393	0.609514	3.56976	NA	NA
TCGA-BH-A1EW-01	Negative	Negative	Negative	Luminal A	non-HER2A	Positive	4.35282	1.39091	6.23375	5.71311	4.36193	3.91682	NA	NA
TCGA-BH-A1EX-01	Positive	Positive	Negative	Luminal A	non-HER2A		2.65765	1.08927	6.20882	3.29695	0.386778	3.55499	NA	NA
TCGA-BH-A1EY-01	Positive	Positive	Negative	Luminal A	non-HER2A		1.05226	0.469115	5.44922	6.36547	3.58121	3.53727	NA	NA
TCGA-BH-A1F0-01	Negative	NA	Negative	Basal-like	non-HER2A	Negative	2.96234	1.444	4.95631	1.14112	0.328201	0.280528	NA	NA
TCGA-BH-A1F2-01	Positive	Positive	Positive	Luminal B	HER2A		9.23463	3.0476	8.63122	4.6777	0.69643	3.19781	NA	NA
TCGA-BH-A1F5-01	Positive	Positive	NA	Luminal A	non-HER2A		2.02753	1.12648	4.99725	7.67199	5.17982	3.29093	NA	NA
TCGA-BH-A1F6-01	Negative	Negative	NA	Basal-like	non-HER2A	Negative	1.7606	0.602983	5.05744	0.885975	0.116613	0.147923	NA	NA
TCGA-BH-A1F8-01	Positive	Positive	Negative	Luminal B	non-HER2A		2.80775	1.3245	5.81244	8.00153	0.575845	4.80247	NA	NA
TCGA-BH-A1FB-01	Positive	Positive	Negative	Luminal A	non-HER2A		2.00184	1.07798	5.56622	5.91729	5.94235	3.78673	NA	NA
TCGA-BH-A1FC-01	Negative	Negative	Negative	Basal-like	non-HER2A	Negative	3.90949	1.051	4.22603	0.580003	0.0822463	0.641378	NA	NA
TCGA-BH-A1FD-01	Positive	Positive	Negative	Luminal B	non-HER2A		0.941269	0.373735	4.13386	7.32449	5.60261	3.58997	NA	NA
TCGA-BH-A1FE-01	Positive	Positive	Negative	Luminal A	non-HER2A		2.83448	1.10784	5.99062	4.43201	3.99947	4.29936	NA	NA
TCGA-BH-A1FG-01	Positive	Positive	NA	Luminal A	non-HER2A		3.17083	1.54481	6.0917	8.29987	4.27554	2.89533	NA	NA
TCGA-BH-A1FJ-01	Negative	Positive	Negative	Luminal B	non-HER2A	Positive	2.40576	1.24763	5.82577	6.72334	5.47487	4.64138	NA	NA
TCGA-BH-A1FL-01	Positive	Positive	Negative	Luminal A	non-HER2A		2.99491	1.08518	6.3404	7.33729	4.43392	3.41231	NA	NA
TCGA-BH-A1FM-01	Positive	Negative	Negative	Luminal B	non-HER2A		1.7769	0.664957	4.2918	7.26349	0.214698	1.60177	NA	NA
TCGA-BH-A1FN-01	Positive	Positive	Negative	Luminal B	non-HER2A		3.93935	1.08906	4.34774	4.75752	2.20975	3.49661	NA	NA
TCGA-BH-A1FR-01	Positive	Positive	Negative	Luminal A	non-HER2A		1.97113	1.00574	5.35671	8.28397	4.42065	3.73201	NA	NA
TCGA-BH-A201-01	Positive	Positive	NA	Luminal A	non-HER2A		1.94924	1.04966	5.85046	5.4506	4.69229	3.60787	NA	NA
TCGA-BH-A202-01	Positive	Positive	NA	Luminal B	HER2A		10.2852	3.17466	8.78498	5.57933	2.42624	4.29696	NA	NA
TCGA-BH-A203-01	NA	NA	NA	HER2E	non-HER2A		1.77421	0.57608	5.12913	1.72118	0.184346	3.67629	NA	NA
TCGA-BH-A204-01	NA	NA	NA	Luminal B	non-HER2A		6.42585	1.92056	5.25682	8.15394	0.338301	3.26296	NA	NA
TCGA-BH-A209-01	Positive	Positive	NA	Luminal B	non-HER2A		1.36652	0.619042	4.21355	5.6142	3.08639	1.55288	NA	NA
TCGA-BH-A28Q-01	Positive	Positive	NA	Luminal A	non-HER2A		1.79974	0.969152	6.52615	5.88684	4.67269	4.50322	NA	NA
TCGA-BH-A2L8-01	Positive	Positive	NA	Luminal A	non-HER2A		1.95215	1.0507	5.64888	3.86422	3.76561	1.94557	NA	NA
TCGA-BH-A42T-01	Positive	Positive	NA	Luminal B	HER2A		5.93417	2.1166	7.48105	6.15181	3.96997	1.95226	NA	NA
TCGA-BH-A42V-01	Positive	Positive	NA	Luminal A	non-HER2A		1.99441	1.09049	6.49498	3.62284	3.56403	2.42029	NA	NA
TCGA-BH-A5IZ-01	NA	NA	NA	Basal-like	non-HER2A		1.10805	0.547698	5.78866	3.39303	0.0506291	0.0193585	NA	NA
TCGA-C8-A12K-01	NA	NA	Negative	Basal-like	non-HER2A		1.2188	0.534597	4.15607	2.64063	0.079516	0.0783396	-0.71129	-0.460286
TCGA-C8-A12L-01	Negative	Negative	Positive	HER2E	HER2A	Positive	6.71336	3.37103	7.60909	1.48112	0.114839	4.57827	1.19142	0.492839
TCGA-C8-A12M-01	Positive	Negative	NA	Luminal B	HER2A		4.998	2.55016	6.9861	7.82028	0.46687	3.42901	1.10539	0.645761
TCGA-C8-A12N-01	Positive	Positive	Negative	Luminal A	non-HER2A		2.03129	1.07042	5.17625	6.28773	4.24814	1.67291	-0.336607	0.231923
TCGA-C8-A12O-01	Positive	Positive	NA	Luminal A	non-HER2A		3.65577	1.18701	5.61965	5.4913	3.11072	3.7305	-0.0293224	-0.0263448
TCGA-C8-A12P-01	Negative	Negative	Positive	HER2E	HER2A	Positive	8.21174	3.47603	9.06817	0.307535	0.303895	1.52091	1.9127	1.29449
TCGA-C8-A12Q-01	Negative	Negative	Positive	HER2E	HER2A	Positive	5.76655	3.10527	10.4853	1.67097	0.475319	4.31785	3.0049	1.78876
TCGA-C8-A12T-01	Positive	Positive	Positive	HER2E	HER2A		8.31764	3.01383	8.63011	4.01352	2.85465	3.06392	0.73678	0.54693
TCGA-C8-A12U-01	Positive	Positive	Negative	Luminal B	non-HER2A		1.80724	0.654839	5.34228	5.03527	0.349053	2.42888	-0.539953	-0.317981
TCGA-C8-A12V-01	Negative	Negative	Negative	Basal-like	non-HER2A	Negative	1.79755	0.847956	3.93924	1.0741	0.154463	0.231079	-0.899707	-0.54873
TCGA-C8-A12W-01	Positive	Positive	Negative	Luminal B	non-HER2A		4.24346	1.28933	6.42188	4.97831	2.24296	2.26452	-0.191921	0.205481
TCGA-C8-A12X-01	Positive	Positive	Negative	Luminal A	non-HER2A		3.1816	1.45467	5.43283	6.7028	2.03808	2.99809	-0.126265	-0.0801057
TCGA-C8-A12Y-01	NA	NA	Negative	Luminal A	non-HER2A		1.91183	1.00747	6.02557	5.41717	3.41204	0.485577	-0.0768417	-0.0511633
TCGA-C8-A12Z-01	Negative	Negative	Positive	HER2E	HER2A	Positive	5.27829	2.88675	11.7756	0.399243	0.11325	2.16511	4.00052	3.5262
TCGA-C8-A130-01	Positive	Positive	Equivocal	Luminal B	non-HER2A		5.37604	1.65938	6.2519	5.33144	2.08125	2.32527	-0.53404	-0.370525
TCGA-C8-A131-01	Negative	Negative	Negative	Basal-like	non-HER2A	Positive	1.87691	0.710474	5.30017	0.52648	0.175451	1.06107	-1.39637	-0.49135
TCGA-C8-A132-01	Positive	Positive	Positive	Luminal A	HER2A		12.3367	6.10097	10.3035	6.40845	2.16196	2.70472	3.83896	3.06999
TCGA-C8-A133-01	Positive	Positive	Negative	Luminal A	non-HER2A		1.92478	1.02003	5.77722	6.42159	3.9863	1.96596	0.249574	0.108066
TCGA-C8-A134-01	Negative	Negative	Negative	Basal-like	non-HER2A	Negative	1.43604	0.579238	4.75461	0.535776	0.154401	0.135777	-0.592194	-0.34554
TCGA-C8-A135-01	Negative	Negative	Positive	HER2E	HER2A	Positive	7.60022	2.2355	9.80736	0.616216	0.29873	5.51943	1.26818	1.23603
TCGA-C8-A137-01	Negative	Negative	Positive	HER2E	HER2A	Positive	7.44701	2.91062	10.3414	1.86995	0.181525	3.21606	3.49747	2.78779
TCGA-C8-A138-01	Positive	Negative	Positive	HER2E	HER2A		6.80942	3.16121	6.83004	3.006	0.206899	0.702147	0.508044	0.15291
TCGA-C8-A1HE-01	Positive	Positive	Negative	Luminal A	non-HER2A		1.95074	1.11935	6.68491	8.84746	1.06245	4.01503	NA	NA
TCGA-C8-A1HF-01	Negative	Positive	Positive	HER2E	non-HER2A	Positive	2.84157	1.29856	10.6109	3.08101	0.608158	1.14739	NA	NA
TCGA-C8-A1HG-01	Positive	Positive	Negative	Luminal B	non-HER2A		3.73028	1.29818	3.9787	6.11414	4.15316	1.91139	NA	NA
TCGA-C8-A1HI-01	Positive	Positive	Negative	Luminal A	non-HER2A		2.76576	0.898032	6.66929	5.6054	2.07358	0.935423	NA	NA
TCGA-C8-A1HJ-01	Negative	Negative	Negative	Basal-like	non-HER2A	Negative	0.972683	0.433524	2.55049	0.36895	0.128596	0.132005	NA	NA
TCGA-C8-A1HK-01	Negative	Negative	Positive	HER2E	HER2A	Positive	8.13623	2.68441	10.2838	1.17165	0.160865	2.96809	NA	NA
TCGA-C8-A1HL-01	Positive	Negative	Positive	Luminal B	HER2A		9.83202	2.84605	7.31119	4.79444	0.263242	1.05412	NA	NA
TCGA-C8-A1HM-01	Positive	Positive	Negative	Luminal B	non-HER2A		3.53099	1.1465	5.39936	7.58636	1.63479	1.97724	NA	NA
TCGA-C8-A1HN-01	Positive	Positive	Equivocal	Luminal B	non-HER2A		4.27131	1.38688	6.53619	7.82237	1.52541	0.886388	NA	NA
TCGA-C8-A1HO-01	Positive	Positive	Negative	Luminal A	non-HER2A		0.859228	0.256806	4.20264	6.35111	0.988738	0.652732	NA	NA
TCGA-C8-A26V-01	Positive	Positive	Negative	Luminal B	non-HER2A		1.14253	0.34157	4.67342	6.30933	3.99497	4.21284	NA	NA
TCGA-C8-A26W-01	Positive	Positive	Positive	Luminal B	HER2A		5.14616	3.13811	7.40859	5.91722	3.7738	2.45732	NA	NA
TCGA-C8-A26X-01	Negative	Negative	Negative	HER2E	HER2A	Positive	7.50651	2.63493	6.96464	0.876249	0.21244	3.54747	NA	NA
TCGA-C8-A26Y-01	Negative	Negative	Negative	HER2E	non-HER2A	Positive	2.95717	1.05476	5.41854	0.214677	0.0806767	0.376774	NA	NA
TCGA-C8-A26Z-01	Positive	Positive	Negative	Luminal A	non-HER2A		3.98046	1.41975	6.743	8.93675	0.317535	4.04402	NA	NA
TCGA-C8-A273-01	Positive	Positive	Negative	Luminal A	non-HER2A		0.553188	0.28681	5.15637	6.1396	2.06259	0.818064	NA	NA
TCGA-C8-A274-01	Positive	Positive	Negative	Luminal B	non-HER2A		2.9539	1.0536	6.3227	7.57229	0.483296	4.2378	NA	NA
TCGA-C8-A275-01	NA	NA	Positive	HER2E	non-HER2A		2.06975	1.02306	10.8217	0.754394	0.134227	2.69738	NA	NA
TCGA-C8-A278-01	Negative	Negative	Positive	HER2E	HER2A	Positive	14.4715	6.34757	9.27721	1.07853	0.264377	4.64882	NA	NA
TCGA-C8-A27A-01	Positive	Positive	Negative	Luminal B	non-HER2A		6.09204	1.97806	5.086	5.76605	2.65866	0.384591	NA	NA
TCGA-C8-A27B-01	Negative	Negative	Negative	Basal-like	non-HER2A	Negative	1.81707	0.756957	3.53301	1.3165	0.050416	0.0435659	NA	NA
TCGA-C8-A3M7-01	Negative	Negative	NA	Luminal A	non-HER2A	Positive	1.35636	0.73003	5.42928	2.97114	0.791972	1.4834	NA	NA
TCGA-C8-A3M8-01	Positive	Positive	NA	Luminal B	non-HER2A		2.9763	1.54311	7.40464	7.32059	0.284187	2.7711	NA	NA
TCGA-D8-A13Y-01	Positive	Positive	Negative	Luminal B	non-HER2A		1.05185	0.39816	3.17436	4.73816	2.37171	2.02948	-0.817676	-0.766306
TCGA-D8-A13Z-01	Negative	Negative	Negative	HER2E	non-HER2A	Positive	1.58657	0.630268	5.15962	0.44508	0.269203	2.77942	-0.454451	-0.245463
TCGA-D8-A140-01	Positive	Positive	Positive	Luminal A	HER2A		4.66728	2.4595	7.21197	7.21447	0.427648	4.33964	0.310793	0.262413
TCGA-D8-A142-01	Negative	Negative	Negative	Basal-like	non-HER2A	Negative	2.50319	1.02596	5.82257	0.575074	0.42575	0.49715	0.0655265	-0.0347675
TCGA-D8-A143-01	Negative	Negative	Negative	Basal-like	non-HER2A	Negative	3.25396	1.31283	5.12181	0.161443	0.0645896	1.28743	-0.463821	1.47867
TCGA-D8-A146-01	Positive	Positive	Negative	Luminal A	non-HER2A		-0.221126	-0.128618	5.35282	7.3525	4.36557	4.65311	-0.282193	-0.238737
TCGA-D8-A147-01	Negative	Negative	Negative	Basal-like	non-HER2A	Negative	3.73988	1.24083	5.30096	0.232261	0.103067	0.165265	-0.509123	-0.278415
TCGA-D8-A1J8-01	Positive	Positive	Negative	Luminal B	non-HER2A		2.00511	0.640717	3.89576	7.29903	0.468967	3.57135	NA	NA
TCGA-D8-A1J9-01	Positive	Negative	Positive	Luminal B	HER2A		9.91184	4.06249	10.738	4.25711	0.336689	5.02183	NA	NA
TCGA-D8-A1JA-01	Negative	Negative	Positive	HER2E	HER2A	Positive	9.50234	2.88718	9.31426	0.878231	0.105938	4.52613	NA	NA
TCGA-D8-A1JB-01	Positive	Positive	Positive	Luminal A	non-HER2A		2.00901	1.04188	6.52052	5.87812	1.06763	2.61108	NA	NA
TCGA-D8-A1JC-01	Positive	Positive	Negative	Luminal B	non-HER2A		2.90632	1.19119	5.81351	7.48597	2.03951	2.72642	NA	NA
TCGA-D8-A1JD-01	Positive	Positive	Negative	Luminal B	non-HER2A		2.06402	1.02023	6.0754	5.61536	3.41887	5.31609	NA	NA
TCGA-D8-A1JF-01	Negative	Negative	Negative	HER2E	non-HER2A	Positive	3.26561	0.976282	6.17139	1.87632	0.190244	5.23592	NA	NA
TCGA-D8-A1JI-01	Positive	Positive	Negative	Luminal A	non-HER2A		3.46418	1.14295	5.73229	6.63947	6.13397	2.09255	NA	NA
TCGA-D8-A1JJ-01	Positive	Positive	Negative	Luminal B	non-HER2A		1.93895	0.570317	4.59735	6.56596	0.803091	3.1035	NA	NA
TCGA-D8-A1JL-01	Negative	Negative	Negative	Basal-like	non-HER2A	Negative	2.13621	0.84861	4.47911	0.602903	0.196495	0.316659	NA	NA
TCGA-D8-A1JM-01	Positive	Negative	Negative	Basal-like	non-HER2A		1.87714	0.622807	5.57511	3.54016	0.0145379	0.0689404	NA	NA
TCGA-D8-A1JN-01	Positive	Positive	Negative	Luminal A	non-HER2A		0.73949	0.398015	6.02291	7.51118	0.103061	4.11949	NA	NA
TCGA-D8-A1JP-01	Positive	Positive	Negative	Luminal B	non-HER2A		3.04776	1.17229	5.43477	7.57564	0.749175	2.37855	NA	NA
TCGA-D8-A1JS-01	Positive	Positive	Negative	Luminal A	non-HER2A		1.88674	1.04826	6.60878	6.6482	4.99427	1.47508	NA	NA
TCGA-D8-A1JT-01	Positive	Positive	Negative	Luminal B	non-HER2A		3.71456	1.57838	5.31164	7.55406	5.44353	1.05498	NA	NA
TCGA-D8-A1JU-01	Positive	Positive	Negative	Luminal A	non-HER2A		1.8904	0.964552	6.04303	6.5167	1.81403	3.44855	NA	NA
TCGA-D8-A1X5-01	Positive	Positive	Positive	Luminal B	HER2A		7.26515	2.59068	8.75172	7.70394	1.18794	4.52407	NA	NA
TCGA-D8-A1X6-01	Positive	Positive	Negative	Luminal B	non-HER2A		3.7281	1.01841	5.65651	7.34209	5.25845	2.32736	NA	NA
TCGA-D8-A1X7-01	Positive	Positive	Negative	Luminal B	non-HER2A		1.75829	0.897146	4.20382	7.33643	5.64622	4.99311	NA	NA
TCGA-D8-A1X8-01	Positive	NA	Negative	Luminal A	non-HER2A		1.96349	1.0909	6.42598	8.05456	2.21772	4.18351	NA	NA
TCGA-D8-A1X9-01	Positive	Positive	Negative	Luminal A	non-HER2A		3.07889	1.76669	6.84681	7.2067	2.09635	3.07098	NA	NA
TCGA-D8-A1XA-01	Positive	Positive	Negative	Luminal A	non-HER2A		3.31552	1.40346	6.11023	7.76874	5.02083	5.02638	NA	NA
TCGA-D8-A1XB-01	Positive	Positive	Negative	Luminal A	non-HER2A		3.0423	1.15162	5.84304	6.77117	6.00479	4.73315	NA	NA
TCGA-D8-A1XC-01	Positive	Positive	Negative	Luminal A	non-HER2A		1.8885	0.979123	4.947	8.90653	5.25856	5.02047	NA	NA
TCGA-D8-A1XF-01	Positive	Positive	Negative	Luminal B	non-HER2A		3.95607	1.35491	6.33029	6.462	0.309439	1.72042	NA	NA
TCGA-D8-A1XG-01	Positive	Negative	Negative	Luminal A	non-HER2A		1.94346	1.04603	4.79982	8.02829	5.13128	4.5375	NA	NA
TCGA-D8-A1XJ-01	Positive	Positive	Positive	HER2E	HER2A		9.29117	2.73287	11.1334	6.16951	0.370947	3.9035	NA	NA
TCGA-D8-A1XK-01	Negative	Negative	Negative	Basal-like	non-HER2A	Negative	0.949068	0.518924	4.61501	0.17933	0.0178215	0.173169	NA	NA
TCGA-D8-A1XL-01	Positive	Positive	Negative	Luminal B	non-HER2A		3.56525	1.22105	7.12574	3.62604	2.34339	0.824669	NA	NA
TCGA-D8-A1XM-01	Positive	Positive	Negative	Luminal A	non-HER2A		2.67174	1.62922	6.81421	5.67205	5.00536	3.56905	NA	NA
TCGA-D8-A1XO-01	Positive	Positive	Negative	Luminal A	non-HER2A		2.55418	1.06375	5.9628	7.32478	2.17517	4.48976	NA	NA
TCGA-D8-A1XR-01	Positive	Positive	Negative	Luminal B	non-HER2A		3.87178	1.12076	5.6688	6.2994	5.124	3.75584	NA	NA
TCGA-D8-A1XS-01	Positive	Positive	Positive	Luminal B	non-HER2A		3.44111	1.7841	6.84154	6.31847	3.86882	3.24569	NA	NA
TCGA-D8-A1XT-01	Negative	Negative	Positive	HER2E	HER2A	Positive	8.57369	3.57164	10.3068	0.530433	0.181702	3.2921	NA	NA
TCGA-D8-A1XU-01	Positive	Positive	Negative	Luminal A	non-HER2A		1.77822	0.548867	5.31306	7.48736	2.49876	3.86809	NA	NA
TCGA-D8-A1XY-01	Positive	Positive	Positive	Luminal A	non-HER2A		4.95384	1.52906	6.31863	6.21534	5.28242	1.94279	NA	NA
TCGA-D8-A1XZ-01	Positive	Negative	Negative	Luminal B	non-HER2A		1.46279	0.482749	4.88319	4.83765	0.31288	2.54097	NA	NA
TCGA-D8-A1Y0-01	Positive	Positive	Negative	Luminal B	non-HER2A		1.91547	1.03096	5.32848	6.65095	4.30224	4.25798	NA	NA
TCGA-D8-A1Y1-01	Positive	Positive	Negative	Luminal B	non-HER2A		2.66092	1.0075	5.7889	6.0983	4.96725	2.69041	NA	NA
TCGA-D8-A1Y2-01	Positive	Positive	Negative	Luminal B	non-HER2A		2.80772	1.5112	6.24001	6.1498	0.592056	1.26053	NA	NA
TCGA-D8-A1Y3-01	Positive	Positive	Negative	Luminal B	non-HER2A		3.17602	1.26235	5.97022	5.07317	2.136	0.433017	NA	NA
TCGA-D8-A27E-01	Positive	Positive	Negative	Luminal A	non-HER2A		2.02151	1.08804	5.76588	8.50025	0.62059	3.74844	NA	NA
TCGA-D8-A27F-01	Negative	Negative	Negative	Basal-like	non-HER2A	Negative	0.865166	0.458494	5.23921	0.310537	0.162314	0.21308	NA	NA
TCGA-D8-A27G-01	Positive	Positive	Negative	Luminal A	non-HER2A		3.32775	1.84887	7.47399	5.20088	0.32578	3.32837	NA	NA
TCGA-D8-A27H-01	Negative	Negative	Negative	Basal-like	non-HER2A	Negative	1.40316	0.516759	5.42335	0.315906	0.198318	0.547431	NA	NA
TCGA-D8-A27I-01	Positive	Positive	Negative	Luminal A	non-HER2A		2.72189	1.06384	5.74498	6.14734	3.21622	2.75688	NA	NA
TCGA-D8-A27K-01	Positive	Positive	Negative	Luminal A	non-HER2A		2.81809	1.03758	6.60416	5.95344	4.13826	3.98677	NA	NA
TCGA-D8-A27L-01	Positive	Positive	Negative	Luminal A	non-HER2A		1.86622	1.02065	5.85227	5.86932	5.28462	4.20425	NA	NA
TCGA-D8-A27M-01	Negative	Negative	Negative	Basal-like	non-HER2A	Negative	1.16625	0.559172	4.52166	1.25346	0.256918	1.08109	NA	NA
TCGA-D8-A27N-01	Positive	Positive	Positive	HER2E	HER2A		9.58614	3.57199	8.88223	4.2157	0.477045	2.96506	NA	NA
TCGA-D8-A27P-01	Positive	Positive	Negative	Luminal A	non-HER2A		1.99645	1.07455	6.72446	4.39377	3.20459	4.7869	NA	NA
TCGA-D8-A27R-01	Positive	Positive	Negative	Luminal B	non-HER2A		3.50448	1.58755	6.20779	5.36997	1.49679	0.716112	NA	NA
TCGA-D8-A27T-01	Positive	Positive	Negative	Luminal A	non-HER2A		4.20689	1.9225	6.45145	7.0757	4.84831	3.25389	NA	NA
TCGA-D8-A27V-01	Positive	Positive	Negative	Luminal A	non-HER2A		0.922428	0.435136	5.53634	7.07776	2.33485	3.72181	NA	NA
TCGA-D8-A27W-01	Positive	Positive	Positive	Luminal B	non-HER2A		5.26876	1.77584	6.63496	5.9565	0.737628	3.68294	NA	NA
TCGA-D8-A3Z5-01	Positive	Positive	NA	Luminal A	non-HER2A		1.8627	1.00256	7.19053	5.47894	4.00394	3.06714	NA	NA
TCGA-D8-A3Z6-01	Positive	Positive	NA	Luminal A	non-HER2A		1.92074	0.949875	6.23021	5.34589	4.3686	3.24037	NA	NA
TCGA-D8-A4Z1-01	Positive	Positive	NA	Luminal A	non-HER2A		2.01677	1.06277	6.48419	4.19199	3.64518	3.13012	NA	NA
TCGA-E2-A105-01	Positive	Positive	Equivocal	Luminal B	non-HER2A		2.96819	1.62292	6.39861	7.82368	1.95293	0.229719	NA	NA
TCGA-E2-A107-01	Positive	Negative	Negative	Luminal B	non-HER2A		2.72943	1.39265	6.94911	6.44017	0.420029	2.03941	0.499062	0.256794
TCGA-E2-A109-01	Positive	Negative	Negative	Luminal B	non-HER2A		4.74951	1.37518	6.68759	6.87047	0.15766	2.59985	0.397783	0.0448101
TCGA-E2-A10B-01	Positive	Positive	Negative	Luminal A	non-HER2A		1.86752	0.806342	5.5993	7.20193	2.76027	4.26295	-0.041843	-0.230748
TCGA-E2-A10C-01	Positive	Positive	Negative	Luminal B	non-HER2A		2.81813	1.08396	6.11719	6.62916	0.134035	1.42968	-0.543655	0.211272
TCGA-E2-A10E-01	Positive	Positive	Negative	Luminal A	non-HER2A		2.03091	1.11045	6.34613	7.85568	1.50788	3.73366	0.0588345	-0.188255
TCGA-E2-A10F-01	Positive	Positive	Negative	Luminal A	non-HER2A		3.01897	1.23736	5.80499	5.60769	6.51432	3.49175	NA	NA
TCGA-E2-A14N-01	Negative	Negative	Negative	Basal-like	non-HER2A	Negative	2.89366	0.907804	3.66134	0.262696	0.275289	0.50499	NA	NA
TCGA-E2-A14O-01	Positive	Positive	Negative	Luminal B	non-HER2A		3.25892	1.56212	6.14071	7.29825	5.45789	1.69814	0.421054	0.392833
TCGA-E2-A14P-01	Negative	Negative	Positive	HER2E	HER2A	Positive	8.16389	3.52404	10.7563	0.535635	0.18794	3.21364	2.72466	1.69475
TCGA-E2-A14Q-01	Positive	Positive	Negative	Luminal A	non-HER2A		1.14845	0.416133	5.55658	7.73913	4.20894	2.80033	-0.0967617	-1.30024
TCGA-E2-A14R-01	Negative	Negative	Negative	Basal-like	non-HER2A	Negative	1.92105	0.647494	5.43287	0.220372	0.0158222	0.0131207	NA	NA
TCGA-E2-A14S-01	Positive	Positive	Negative	Luminal B	non-HER2A		2.1134	0.926989	5.90603	7.65532	2.46906	1.55121	0.27456	-0.00396708
TCGA-E2-A14T-01	Positive	Positive	Negative	Luminal A	non-HER2A		3.80491	1.28245	6.46816	6.76825	0.664917	3.2126	-0.0433063	0.207614
TCGA-E2-A14U-01	Positive	Positive	NA	Luminal A	non-HER2A		1.90205	1.00231	6.96662	6.481	4.3296	2.92825	NA	NA
TCGA-E2-A14V-01	Positive	Positive	Positive	HER2E	HER2A		9.39952	3.40584	9.46735	4.59994	3.04748	3.29326	2.54317	1.60679
TCGA-E2-A14W-01	Positive	Positive	Positive	Luminal B	non-HER2A		3.03147	1.73948	6.1853	6.52328	4.07634	0.972384	0.025366	-0.393714
TCGA-E2-A14X-01	Negative	Negative	Negative	Basal-like	non-HER2A	Negative	2.23202	0.646259	5.21968	1.41695	0.170915	0.169625	-0.323955	0.264227
TCGA-E2-A14Y-01	Positive	Positive	Positive	Basal-like	non-HER2A		3.6144	1.70502	10.1315	1.29335	0.0520544	0.0169772	3.1976	2.45841
TCGA-E2-A14Z-01	Positive	Positive	Negative	Luminal A	non-HER2A		1.11523	0.551249	5.30232	5.87284	4.09529	1.59824	-0.469388	-0.40544
TCGA-E2-A150-01	Negative	Negative	Negative	Basal-like	non-HER2A	Negative	1.74515	0.622462	5.15784	0.457302	0.128476	0.214567	-0.293941	1.30778
TCGA-E2-A152-01	Positive	Negative	Positive	HER2E	non-HER2A		2.15404	0.677551	11.2672	2.10858	0.268287	3.65194	3.87262	3.09983
TCGA-E2-A153-01	Positive	Positive	Negative	Luminal A	non-HER2A		3.6733	1.13381	6.50072	5.00043	4.31	2.84497	0.540295	0.088688
TCGA-E2-A154-01	Positive	Positive	Negative	Luminal A	non-HER2A		2.92611	0.950098	6.27645	7.3642	6.16851	4.89294	-0.0465557	-0.059609
TCGA-E2-A155-01	Positive	Negative	Negative	Luminal B	non-HER2A		3.85334	1.27134	7.23236	7.57291	0.407995	2.96155	1.32182	0.615687
TCGA-E2-A156-01	Positive	Positive	Negative	Luminal A	non-HER2A		1.92998	1.01703	6.65938	8.26089	6.16496	4.74255	0.426817	0.0777731
TCGA-E2-A158-01	Negative	Negative	Negative	Basal-like	non-HER2A	Negative	1.57982	0.443799	5.48838	0.0485871	0.0180468	0.0746306	-0.124557	-0.370095
TCGA-E2-A15A-01	Positive	Positive	Negative	Luminal B	non-HER2A		3.95325	1.14463	6.31638	5.44186	2.31691	2.87938	1.04309	0.0321268
TCGA-E2-A15A-06	Positive	Positive	Negative	Luminal B	non-HER2A		2.91007	1.10156	6.11488	4.97258	2.90434	1.79317	NA	NA
TCGA-E2-A15D-01	Positive	Positive	Negative	Luminal A	non-HER2A		1.92617	0.923523	6.3758	5.2986	4.62163	2.10085	0.383273	0.14228
TCGA-E2-A15E-01	Positive	Positive	Positive	Luminal A	HER2A		6.47951	2.79767	7.51463	4.40232	4.39644	4.252	1.27654	0.570408
TCGA-E2-A15E-06	Positive	Positive	Positive	Luminal A	HER2A		6.9365	2.21706	7.8993	6.65585	5.97803	4.631	NA	NA
TCGA-E2-A15F-01	Positive	Positive	Negative	Luminal A	non-HER2A		1.85608	1.097	5.94334	7.68284	5.36344	3.94174	-0.746826	-0.288956
TCGA-E2-A15G-01	Positive	Positive	Negative	Luminal A	non-HER2A		1.94834	0.841024	6.18049	7.435	6.01297	4.22893	0.117291	0.113381
TCGA-E2-A15H-01	Positive	Positive	Positive	Luminal A	HER2A		9.2586	2.81241	9.24309	5.14887	2.36335	3.81897	1.66509	1.2317
TCGA-E2-A15I-01	Positive	Positive	Negative	Luminal A	non-HER2A		1.95443	1.01331	6.3581	6.55376	3.94368	4.64415	NA	NA
TCGA-E2-A15J-01	Positive	Positive	Negative	Luminal A	non-HER2A		1.97436	0.991651	6.54746	5.01185	2.98848	3.27998	0.729599	0.143354
TCGA-E2-A15K-01	Positive	Positive	Negative	Luminal B	non-HER2A		1.8191	0.943388	6.2492	6.66659	0.561514	2.94704	0.0903242	-0.0590811
TCGA-E2-A15K-06	Positive	Positive	Negative	Luminal A	non-HER2A		1.90532	1.00457	6.47038	7.52432	2.53781	3.87224	NA	NA
TCGA-E2-A15L-01	Positive	Positive	Negative	Luminal A	non-HER2A		1.98964	0.953708	6.10936	6.55032	3.86189	3.66378	0.288018	0.0910079
TCGA-E2-A15M-01	Positive	Positive	Negative	Luminal B	non-HER2A		1.53546	0.547531	6.47302	6.03576	3.09806	2.90602	-0.311811	-0.0881954
TCGA-E2-A15O-01	Positive	Positive	Negative	Luminal A	non-HER2A		1.99905	1.00405	5.63013	7.05883	3.85538	3.09815	-0.0435755	-0.239536
TCGA-E2-A15P-01	Positive	Positive	Negative	Luminal A	non-HER2A		2.73793	1.14027	6.8549	6.8613	1.09918	3.26258	0.00697087	-0.188375
TCGA-E2-A15R-01	Positive	Positive	Negative	Luminal A	non-HER2A		3.98433	1.0884	6.33239	7.67197	1.1116	3.58322	0.1424	-0.122736
TCGA-E2-A15S-01	Positive	Negative	Negative	Luminal B	non-HER2A		3.80507	1.13756	6.13406	6.34563	0.202947	1.34544	0.0541383	-0.0955553
TCGA-E2-A15T-01	Positive	Positive	Negative	Luminal B	non-HER2A		3.2603	1.75566	6.639	7.94705	0.886327	3.81537	0.699081	0.391412
TCGA-E2-A1AZ-01	Negative	Negative	Negative	Basal-like	non-HER2A	Negative	1.99017	0.815696	5.39405	0.976592	0.504561	1.43056	0.248134	-0.0473405
TCGA-E2-A1B0-01	Negative	Negative	Positive	HER2E	HER2A	Positive	9.23569	3.78536	10.116	0.321961	0.38823	3.54641	-0.03796	0.43516
TCGA-E2-A1B4-01	Positive	Positive	Negative	Luminal A	non-HER2A		2.04494	1.06051	6.63824	7.41015	4.62272	1.47644	0.115209	-0.293308
TCGA-E2-A1B5-01	Positive	Positive	Negative	Luminal A	non-HER2A		1.54049	0.786014	3.92558	3.05379	0.576654	1.34668	-0.990473	-0.970236
TCGA-E2-A1B6-01	Negative	Negative	Negative	Basal-like	non-HER2A	Negative	1.7772	0.921659	4.6336	0.746441	0.701941	0.0285258	-0.629197	-0.218548
TCGA-E2-A1BC-01	Positive	Positive	Negative	Luminal A	non-HER2A		1.94552	1.04713	6.47987	5.65072	3.8818	4.96968	-0.169248	-0.306027
TCGA-E2-A1BD-01	Positive	Positive	Negative	Luminal A	non-HER2A		3.5872	0.976213	5.75648	6.54379	4.7003	2.24523	0.207996	-0.221089
TCGA-E2-A1IE-01	Positive	Positive	Negative	Luminal A	non-HER2A		3.34702	1.06951	6.47606	6.91969	1.92195	2.74892	NA	NA
TCGA-E2-A1IF-01	Positive	Positive	Negative	Luminal A	non-HER2A		1.88589	1.04778	5.53255	6.13467	2.09789	0.610711	NA	NA
TCGA-E2-A1IG-01	Positive	Positive	NA	Luminal A	non-HER2A		3.77742	1.95898	6.33454	5.85351	1.63261	0.808006	NA	NA
TCGA-E2-A1IH-01	Positive	Positive	Negative	Luminal A	non-HER2A		3.70231	1.20213	5.68334	5.71687	2.72352	1.21715	NA	NA
TCGA-E2-A1II-01	Negative	Positive	Negative	Basal-like	non-HER2A	Negative	1.19767	0.783996	4.29729	0.277267	0.259797	0.145288	NA	NA
TCGA-E2-A1IJ-01	Positive	Positive	Negative	Luminal A	non-HER2A		2.63068	1.32096	6.64892	5.83657	4.65269	1.7604	NA	NA
TCGA-E2-A1IK-01	Positive	Positive	Negative	Luminal A	non-HER2A		1.84818	0.995235	4.03173	7.83255	3.84006	3.18826	NA	NA
TCGA-E2-A1IL-01	Positive	Positive	Negative	Luminal A	non-HER2A		1.98102	1.04393	6.53264	6.98	2.17647	5.29351	NA	NA
TCGA-E2-A1IN-01	Positive	Positive	Negative	Luminal A	non-HER2A		1.92491	0.966571	5.73765	7.06115	4.94393	2.69312	NA	NA
TCGA-E2-A1L6-01	Positive	Positive	Negative	Luminal A	non-HER2A		1.90375	1.00321	5.76611	5.58653	5.81413	2.74034	NA	NA
TCGA-E2-A1L7-01	Negative	Negative	Negative	Luminal B	non-HER2A	Positive	1.2999	0.408884	4.21193	5.65893	4.60167	3.19758	NA	NA
TCGA-E2-A1L8-01	Positive	Positive	Negative	Luminal A	non-HER2A		2.77773	1.1803	5.71149	6.21881	4.42283	2.26711	NA	NA
TCGA-E2-A1L9-01	Positive	Positive	Negative	Luminal A	non-HER2A		1.82739	0.932402	5.5118	6.08009	3.18164	2.26305	NA	NA
TCGA-E2-A1LA-01	Positive	Positive	Negative	Luminal A	non-HER2A		2.76289	1.58621	6.58146	6.25376	0.828958	1.36414	NA	NA
TCGA-E2-A1LB-01	Negative	Negative	Positive	HER2E	HER2A	Positive	4.04342	2.28332	11.2586	0.611526	0.156837	4.68551	NA	NA
TCGA-E2-A1LE-01	Negative	Negative	NA	HER2E	HER2A	Positive	9.2807	3.41703	10.6339	0.606641	0.150388	1.74333	NA	NA
TCGA-E2-A1LG-01	Negative	Negative	Negative	Basal-like	non-HER2A	Negative	2.8188	1.02137	6.60854	0.0684731	0.00812603	0.0419181	NA	NA
TCGA-E2-A1LH-01	Negative	Negative	Negative	Basal-like	non-HER2A	Negative	3.50571	1.01479	5.53658	0.701678	0.0907071	0.010818	NA	NA
TCGA-E2-A1LI-01	Negative	Negative	Negative	Basal-like	non-HER2A	Negative	2.67251	0.968362	5.70754	0.74433	0.0529824	0.0375713	NA	NA
TCGA-E2-A1LL-01	Negative	Negative	Negative	Basal-like	non-HER2A	Negative	1.77352	0.715542	4.77714	2.07061	0.711151	0.742352	NA	NA
TCGA-E2-A2P5-01	Positive	Positive	NA	Luminal B	non-HER2A		2.04392	0.689081	5.38006	5.78091	3.81886	2.81274	NA	NA
TCGA-E2-A2P6-01	Positive	Positive	NA	Luminal A	non-HER2A		1.93085	1.056	6.56499	7.25211	0.370535	1.31012	NA	NA
TCGA-E2-A3DX-01	Positive	Positive	NA	Luminal A	non-HER2A		2.25212	1.23171	7.81873	5.67833	4.3763	3.55185	NA	NA
TCGA-E2-A570-01	Positive	Positive	NA	Luminal A	non-HER2A		2.00189	1.02144	6.14356	5.44031	4.15945	0.655954	NA	NA
TCGA-E2-A574-01	NA	NA	NA	Basal-like	non-HER2A		3.54291	1.64518	5.32649	0.0600511	0.0216882	0.00789886	NA	NA
TCGA-E9-A1N3-01	NA	NA	Negative	Luminal A	non-HER2A		1.99059	1.10595	5.94667	8.04451	2.14915	1.04203	NA	NA
TCGA-E9-A1N4-01	Positive	Positive	Negative	Luminal A	non-HER2A		2.64448	1.10164	5.21205	4.44747	4.88832	3.75257	NA	NA
TCGA-E9-A1N5-01	Positive	Positive	Negative	Luminal A	non-HER2A		0.954528	0.513755	4.86266	5.55825	4.73434	4.02264	NA	NA
TCGA-E9-A1N6-01	Positive	Positive	Positive	Luminal B	HER2A		8.07301	2.49183	7.08645	6.0748	3.3564	4.01791	NA	NA
TCGA-E9-A1N8-01	Negative	NA	Negative	Basal-like	non-HER2A	Negative	1.19173	0.340178	4.58428	0.0693559	0.0374889	0.0446498	NA	NA
TCGA-E9-A1N9-01	Negative	Positive	Negative	Basal-like	non-HER2A	Positive	2.81247	0.978772	5.21621	7.06823	0.612936	4.92198	NA	NA
TCGA-E9-A1NA-01	Positive	Positive	Negative	Luminal B	non-HER2A		1.12338	0.439066	5.3159	6.17645	0.320967	2.28261	NA	NA
TCGA-E9-A1ND-01	Negative	Negative	Negative	Basal-like	non-HER2A	Negative	1.80436	0.73954	4.72002	1.66138	0.0831701	0.179823	NA	NA
TCGA-E9-A1NF-01	Positive	Positive	Negative	Luminal B	non-HER2A		2.63178	0.873186	5.32274	6.86044	1.01127	2.91117	NA	NA
TCGA-E9-A1NG-01	Positive	Positive	Negative	Luminal A	non-HER2A		1.91075	1.00743	5.52908	4.32939	2.58444	2.56747	NA	NA
TCGA-E9-A1NH-01	Positive	Positive	Negative	Luminal A	non-HER2A		2.85749	0.840493	6.24558	6.88223	1.46752	3.04255	NA	NA
TCGA-E9-A1NI-01	Positive	Positive	Negative	Luminal B	non-HER2A		3.34606	1.06921	5.94429	7.01789	2.1468	2.32587	NA	NA
TCGA-E9-A1R0-01	NA	NA	Negative	Luminal A	non-HER2A		1.90146	1.07347	6.27708	5.85616	5.79666	3.34067	NA	NA
TCGA-E9-A1R2-01	Positive	Negative	Negative	Luminal A	non-HER2A		4.25812	1.61185	6.79357	6.04962	0.174484	0.582121	NA	NA
TCGA-E9-A1R3-01	NA	NA	Negative	Luminal A	non-HER2A		1.95437	0.952161	5.37564	5.08897	2.4765	3.11652	NA	NA
TCGA-E9-A1R4-01	NA	NA	Negative	Luminal B	non-HER2A		2.58481	0.871213	5.55872	6.06313	3.71651	1.5711	NA	NA
TCGA-E9-A1R5-01	NA	NA	Negative	Luminal A	non-HER2A		2.75318	1.4278	6.71653	6.75418	4.72861	2.73116	NA	NA
TCGA-E9-A1R7-01	NA	NA	Negative	Luminal B	non-HER2A		3.89408	1.5711	6.39611	8.73795	1.35504	2.47294	NA	NA
TCGA-E9-A1RB-01	NA	NA	Negative	Luminal B	non-HER2A		1.58312	0.555705	4.31029	5.63666	3.45318	3.61417	NA	NA
TCGA-E9-A1RC-01	NA	NA	Negative	Luminal A	non-HER2A		3.12283	0.918537	5.72812	7.80864	4.49957	4.26396	NA	NA
TCGA-E9-A1RD-01	NA	NA	Negative	Luminal A	non-HER2A		3.05297	1.0456	5.84435	7.94499	5.0888	4.14438	NA	NA
TCGA-E9-A1RE-01	NA	NA	Negative	Luminal B	non-HER2A		3.97882	1.41881	6.8257	8.03631	3.1615	3.44949	NA	NA
TCGA-E9-A1RF-01	NA	NA	Negative	Luminal A	non-HER2A		3.68607	1.24271	6.63239	5.91469	0.658797	2.0807	NA	NA
TCGA-E9-A1RH-01	NA	NA	Negative	HER2E	non-HER2A		2.97498	0.981546	5.26971	0.817018	0.230206	4.28639	NA	NA
TCGA-E9-A1RI-01	NA	NA	NA	Luminal A	non-HER2A		3.18284	1.76836	6.68289	4.70657	1.56791	4.04159	NA	NA
TCGA-E9-A226-01	NA	NA	Negative	Luminal B	non-HER2A		1.01954	0.548748	5.04165	6.27222	4.47456	4.34018	NA	NA
TCGA-E9-A227-01	Positive	Positive	Negative	Luminal A	non-HER2A		1.90708	1.04274	5.42321	5.70093	3.91377	2.33821	NA	NA
TCGA-E9-A228-01	NA	NA	Positive	Luminal B	HER2A		10.2151	3.15302	8.10942	7.6577	0.191922	4.01353	NA	NA
TCGA-E9-A229-01	NA	NA	Negative	Luminal A	non-HER2A		1.98376	1.17188	5.85531	4.76794	4.51107	3.48943	NA	NA
TCGA-E9-A22A-01	Positive	Negative	Negative	Luminal B	non-HER2A		1.07881	0.619359	4.41892	4.41009	0.539214	0.759781	NA	NA
TCGA-E9-A22B-01	Positive	Negative	Negative	Luminal A	non-HER2A		2.31646	1.3292	5.83702	6.42528	0.316664	2.13166	NA	NA
TCGA-E9-A22D-01	Positive	Positive	Positive	Luminal B	HER2A		8.88707	3.16984	8.43735	5.33629	1.76151	2.14573	NA	NA
TCGA-E9-A22E-01	Positive	Positive	Negative	Luminal B	non-HER2A		2.05728	0.715957	4.26785	6.05291	0.983454	0.997297	NA	NA
TCGA-E9-A22G-01	Negative	Negative	Negative	Basal-like	non-HER2A	Negative	1.13811	0.437761	4.98092	0.901892	0.0313998	0.00459506	NA	NA
TCGA-E9-A22H-01	Positive	Positive	Negative	Luminal B	non-HER2A		2.0353	1.1308	5.69966	6.92036	5.55634	3.81959	NA	NA
TCGA-E9-A243-01	NA	NA	Negative	Basal-like	non-HER2A		2.59654	0.829914	3.88649	1.26387	0.169068	0.570688	NA	NA
TCGA-E9-A244-01	NA	NA	Negative	Basal-like	non-HER2A		3.11617	0.995747	5.78212	0.640817	0.141697	0.710476	NA	NA
TCGA-E9-A245-01	NA	NA	Negative	Luminal A	non-HER2A		1.93108	1.00146	5.74516	5.43604	4.22552	2.17541	NA	NA
TCGA-E9-A247-01	NA	NA	Negative	Luminal A	non-HER2A		1.84454	0.956331	6.26115	8.05499	5.11524	1.79037	NA	NA
TCGA-E9-A248-01	NA	NA	Negative	HER2E	non-HER2A		2.65836	0.978771	5.63509	1.48232	0.142705	1.29827	NA	NA
TCGA-E9-A249-01	NA	NA	Negative	Luminal B	non-HER2A		1.67325	0.900592	6.41643	6.37509	6.39197	3.07187	NA	NA
TCGA-E9-A24A-01	NA	NA	Negative	Luminal A	non-HER2A		1.87042	1.00721	5.27985	7.88218	4.54051	3.78309	NA	NA
TCGA-E9-A295-01	Positive	Positive	NA	Luminal A	non-HER2A		3.68029	1.24076	6.04581	5.03963	3.09103	2.24651	NA	NA
TCGA-E9-A2JS-01	NA	NA	NA	Luminal B	non-HER2A		4.67639	1.66798	6.68006	6.45802	1.03573	2.9626	NA	NA
TCGA-E9-A2JT-01	NA	NA	NA	Luminal A	non-HER2A		1.78609	0.976832	4.11402	5.17292	0.458773	2.60834	NA	NA
TCGA-E9-A3HO-01	NA	NA	NA	Luminal B	non-HER2A		3.82585	1.18089	6.15132	5.77368	3.06147	1.03368	NA	NA
TCGA-E9-A3Q9-01	Positive	Positive	NA	Luminal A	non-HER2A		1.8823	1.01311	4.97424	6.53175	5.94654	3.22991	NA	NA
TCGA-E9-A3QA-01	NA	NA	NA	Basal-like	non-HER2A		2.78678	0.832914	4.98316	2.86339	0.212263	0.141666	NA	NA
TCGA-E9-A3X8-01	Positive	Positive	NA	Luminal A	non-HER2A		2.04336	0.882265	5.71264	4.6742	3.89033	0.347453	NA	NA
TCGA-E9-A54X-01	Positive	Positive	NA	Luminal A	non-HER2A		1.8935	0.922991	5.41831	7.81727	5.14284	1.19272	NA	NA
TCGA-E9-A5UO-01	NA	NA	NA	Luminal B	non-HER2A		5.61127	1.82196	6.95835	6.50214	3.62445	1.56246	NA	NA
TCGA-E9-A5UP-01	NA	NA	NA	Luminal A	non-HER2A		6.41112	1.97887	8.08661	6.90681	0.256889	2.25675	NA	NA
TCGA-EW-A1IW-01	Positive	Positive	Positive	Luminal A	HER2A		10.6002	4.34461	9.9534	6.57504	4.45545	2.35664	NA	NA
TCGA-EW-A1IX-01	Positive	Positive	Negative	Luminal A	non-HER2A		1.86432	1.0358	6.63207	5.3068	5.55386	4.41151	NA	NA
TCGA-EW-A1IY-01	Positive	Positive	Negative	Luminal B	non-HER2A		2.10193	0.893591	4.25033	5.37527	3.76092	3.41175	NA	NA
TCGA-EW-A1J2-01	Positive	Positive	Negative	Luminal A	non-HER2A		2.32532	1.2056	6.7948	6.47145	3.35192	3.70434	NA	NA
TCGA-EW-A1J3-01	Positive	Positive	Positive	Luminal A	HER2A		10.9011	3.59756	9.0337	6.38439	3.45533	2.24124	NA	NA
TCGA-EW-A1J5-01	Positive	Positive	Negative	Luminal A	non-HER2A		2.74611	1.52571	6.72432	5.95257	5.29129	3.7995	NA	NA
TCGA-EW-A1J6-01	Positive	Positive	Negative	Luminal B	non-HER2A		4.39064	1.37708	5.19291	7.64096	3.30029	0.707886	NA	NA
TCGA-EW-A1OV-01	Negative	Negative	Negative	HER2E	non-HER2A	Positive	2.43186	1.11188	5.73011	0.420892	0.0416891	3.00919	NA	NA
TCGA-EW-A1OW-01	Negative	Negative	Negative	Basal-like	non-HER2A	Negative	3.06602	1.2367	5.31113	0.172574	0.248051	0.665568	NA	NA
TCGA-EW-A1OX-01	Positive	Positive	Negative	Luminal B	non-HER2A		1.80975	0.953677	5.79327	6.63866	1.95758	4.3072	NA	NA
TCGA-EW-A1OY-01	Positive	Positive	Negative	Luminal B	non-HER2A		3.39751	1.19259	6.4126	7.61305	3.72142	3.0208	NA	NA
TCGA-EW-A1OZ-01	Positive	Negative	Positive	Luminal B	HER2A		8.28144	3.18537	10.3637	4.71516	0.319529	5.2259	NA	NA
TCGA-EW-A1P0-01	Positive	Negative	Negative	Luminal B	non-HER2A		1.88818	0.963417	2.43912	5.91011	0.152107	1.73065	NA	NA
TCGA-EW-A1P3-01	Positive	Positive	Negative	Luminal A	non-HER2A		2.64848	1.35135	6.94034	6.37288	3.79213	0.979327	NA	NA
TCGA-EW-A1P4-01	Negative	Negative	Negative	Basal-like	non-HER2A	Negative	0.993811	0.507079	4.89046	0.452793	0.0583595	0.273234	NA	NA
TCGA-EW-A1P6-01	Positive	Positive	Negative	Luminal A	non-HER2A		2.00484	1.00671	5.92029	7.39559	6.73572	3.42316	NA	NA
TCGA-EW-A1P8-01	Negative	Negative	Negative	Basal-like	non-HER2A	Negative	1.00754	0.551034	5.04106	1.53291	0.312146	0.886321	NA	NA
TCGA-EW-A1PA-01	Positive	Positive	Negative	Luminal A	non-HER2A		0.84707	0.347182	5.3129	7.58111	0.94782	2.06561	NA	NA
TCGA-EW-A1PB-01	Negative	Negative	Negative	Basal-like	non-HER2A	Negative	2.77326	0.82909	5.00134	0.601921	0.00836391	0.0336568	NA	NA
TCGA-EW-A1PC-01	Positive	Positive	NA	Luminal B	non-HER2A		6.32062	1.6992	6.56483	5.30526	0.656322	2.96025	NA	NA
TCGA-EW-A1PD-01	Positive	Positive	Positive	Luminal A	non-HER2A		3.43611	1.87877	7.24341	6.47079	1.18711	3.17796	NA	NA
TCGA-EW-A1PE-01	Positive	Positive	Negative	Luminal A	non-HER2A		3.84963	1.08143	5.96755	7.64485	3.36624	4.53661	NA	NA
TCGA-EW-A1PF-01	Positive	Positive	Negative	Luminal A	non-HER2A		0.869171	0.521603	5.65669	6.80854	1.70258	4.54114	NA	NA
TCGA-EW-A1PH-01	Negative	Negative	NA	Basal-like	non-HER2A	Negative	3.96069	1.40096	5.90576	0.176763	0.140271	0.0971643	NA	NA
TCGA-EW-A2FR-01	Negative	Negative	NA	HER2E	HER2A	Positive	13.323	5.20855	10.6925	1.13292	0.499609	1.31268	NA	NA
TCGA-EW-A2FV-01	Positive	Positive	NA	Luminal A	non-HER2A		2.52327	0.754499	5.81513	5.02509	2.56254	0.696255	NA	NA
TCGA-EW-A2FW-01	Positive	Positive	NA	Luminal B	non-HER2A		2.00278	1.18312	6.36635	7.26352	1.64011	2.15019	NA	NA
TCGA-EW-A3E8-01	Positive	Negative	NA	Luminal A	non-HER2A		1.83857	1.12115	6.84223	4.90249	2.39081	2.92485	NA	NA
TCGA-EW-A3U0-01	Negative	Negative	NA	Basal-like	non-HER2A	Negative	1.91749	1.08252	5.00749	0.412909	0.0647126	0.625922	NA	NA
TCGA-EW-A423-01	Positive	Positive	NA	Luminal A	non-HER2A		3.97496	1.36137	6.58045	7.19955	0.203496	0.907134	NA	NA
TCGA-EW-A424-01	Positive	Positive	NA	Luminal A	non-HER2A		2.99514	1.22759	5.93081	5.05316	4.13381	1.59116	NA	NA
TCGA-GI-A2C8-01	Positive	Positive	NA	Luminal A	non-HER2A		1.82841	0.673197	2.70156	5.69567	0.267923	3.43586	NA	NA
TCGA-GI-A2C9-01	Negative	Negative	NA	Basal-like	non-HER2A	Negative	2.00573	0.686937	4.97924	0.642119	0.105335	0.867439	NA	NA
TCGA-GM-A2D9-01	Positive	Positive	NA	Luminal A	non-HER2A		1.8655	1.05317	6.02606	6.55221	0.965656	1.59846	NA	NA
TCGA-GM-A2DA-01	Positive	Positive	NA	Luminal A	HER2A		4.4462	2.47027	8.65893	4.38363	2.39853	1.60182	NA	NA
TCGA-GM-A2DB-01	Negative	Negative	NA	HER2E	non-HER2A	Positive	2.05569	0.733223	5.32451	0.542705	0.0795898	1.62999	NA	NA
TCGA-GM-A2DC-01	Positive	Positive	NA	Luminal A	non-HER2A		2.89041	1.47479	6.91726	5.77644	1.3637	1.183	NA	NA
TCGA-GM-A2DF-01	Negative	Negative	NA	Basal-like	non-HER2A	Negative	3.31762	0.975834	4.70947	0.359707	0.0597952	0.117631	NA	NA
TCGA-GM-A2DH-01	Negative	Negative	NA	HER2E	non-HER2A	Positive	3.26021	1.05858	5.71108	2.59046	0.0907012	4.18478	NA	NA
TCGA-GM-A2DI-01	Negative	Negative	NA	Luminal A	non-HER2A	Positive	1.70697	0.933322	5.18689	5.37349	3.74484	4.31691	NA	NA
TCGA-GM-A2DK-01	Positive	Negative	NA	Luminal A	non-HER2A		2.62185	1.38163	6.47882	6.69443	1.73296	0.180271	NA	NA
TCGA-GM-A2DL-01	Positive	Positive	NA	Luminal B	non-HER2A		0.774766	0.457911	5.04196	5.37876	4.51941	2.47324	NA	NA
TCGA-GM-A2DM-01	Positive	Positive	NA	Luminal A	non-HER2A		1.86702	1.02084	5.31013	6.13177	4.92718	3.04436	NA	NA
TCGA-GM-A2DN-01	Positive	Positive	NA	Luminal A	non-HER2A		2.99121	1.10161	5.86522	5.67848	2.1325	2.44267	NA	NA
TCGA-GM-A2DO-01	Positive	Positive	NA	Luminal B	non-HER2A		2.13087	1.16539	5.44776	4.54893	2.96916	0.576214	NA	NA
TCGA-GM-A3NW-01	Negative	Positive	NA	Luminal A	non-HER2A	Positive	2.09164	1.08473	6.73863	5.75565	0.202319	1.43429	NA	NA
TCGA-GM-A3NY-01	Positive	Positive	NA	Luminal A	non-HER2A		1.98626	1.08631	5.84261	6.46389	0.593241	0.989428	NA	NA
TCGA-GM-A3XL-01	Negative	Negative	NA	Basal-like	non-HER2A	Negative	1.25129	0.59027	4.47336	1.08806	0.0581264	0.0236919	NA	NA
TCGA-GM-A3XN-01	Positive	Positive	NA	Luminal A	non-HER2A		2.88301	1.05774	5.66348	3.8919	4.04313	1.37224	NA	NA
TCGA-GM-A4E0-01	Positive	Positive	NA	Luminal A	non-HER2A		4.09157	1.13115	5.51547	4.91855	2.57635	0.701743	NA	NA
TCGA-HN-A2NL-01	NA	NA	NA	Basal-like	non-HER2A		0.823768	0.367248	2.79179	0.573446	0.027438	0.0373124	NA	NA
TCGA-JL-A3YW-01	Positive	Positive	NA	HER2E	non-HER2A		3.88244	1.61735	6.00744	0.712828	0.15158	3.02342	NA	NA
TCGA-JL-A3YX-01	Positive	Positive	NA	Luminal A	non-HER2A		3.88314	1.12433	6.08141	5.03791	4.86104	2.25251	NA	NA
TCGA-LL-A442-01	Positive	Positive	NA	Luminal A	non-HER2A		1.95079	1.08384	6.45974	7.84234	4.80381	0.169793	NA	NA
TCGA-LL-A50Y-01	Positive	Positive	NA	Luminal A	non-HER2A		1.88765	1.03211	7.16267	6.73741	3.82235	1.13686	NA	NA
TCGA-LL-A5YN-01	NA	NA	NA	Luminal A	non-HER2A		5.06643	1.98018	6.96921	4.46276	1.27797	0.444719	NA	NA
TCGA-LL-A5YP-01	NA	NA	NA	Basal-like	non-HER2A		3.17246	1.08653	4.82342	0.305455	0.0779583	0.126151	NA	NA
TCGA-LQ-A4E4-01	Positive	Positive	NA	Luminal A	non-HER2A		1.55585	0.489391	5.96881	7.49955	0.44077	3.75495	NA	NA
TCGA-MS-A51U-01	Positive	Positive	NA	Luminal A	non-HER2A		3.86179	1.32262	6.66263	4.71049	3.27701	3.08574	NA	NA
TCGA-OL-A5D8-01	Positive	Positive	NA	Luminal A	non-HER2A		2.90764	1.0371	6.33408	6.55277	5.61815	2.38893	NA	NA
TCGA-OL-A5DA-01	Positive	Positive	NA	Luminal A	non-HER2A		2.93351	1.12834	6.58003	5.97376	2.56251	1.88489	NA	NA
TCGA-OL-A5RV-01	Positive	Positive	NA	Luminal A	non-HER2A		1.93189	1.04031	7.00383	5.54205	4.89684	4.04068	NA	NA
TCGA-OL-A5RW-01	Negative	Negative	NA	Basal-like	non-HER2A	Negative	3.95942	1.33487	5.40467	0.234617	0.0221152	0.00716234	NA	NA
TCGA-OL-A5RX-01	Positive	Positive	NA	Luminal A	non-HER2A		2.0265	1.0679	6.77221	5.1955	4.41053	2.25234	NA	NA
TCGA-OL-A5S0-01	Positive	Negative	NA	Basal-like	HER2A		5.94524	2.56633	5.90473	0.201091	0.0949716	0.0211927	NA	NA
TCGA-OL-A66K-01	Positive	Positive	NA	Luminal A	non-HER2A		4.33012	1.25343	6.86287	6.03147	6.06234	0.92644	NA	NA
TCGA-PE-A5DD-01	NA	NA	NA	Luminal A	non-HER2A		1.03309	0.467995	5.3079	6.83331	2.92237	2.42302	NA	NA
TCGA-PE-A5DE-01	NA	NA	NA	Luminal A	non-HER2A		1.68977	0.692572	5.23005	5.73939	3.43136	2.13727	NA	NA

## Sheet: Metabric
Clinical metadata, subtype information, HER2A status, AR-ness score, HER2 copy number, and expression levels of ERBB2, ER, PR and AR for Metabric tumors
Tumor	ER IHC	PR status derived from expression (Curtis et al, 2012)	HER2 IHC	PAM50 subtype	IntClust subtype	HER2A status	AR-ness	HER2 copy number	HER2 copy number / tumor ploidy	ERBB2 expression (log2 expression ratio)	ER expression (log2 expression ratio)	PR expression (log2 expression ratio)	AR expression (log2 expression ratio)
MB-0002	Positive	Positive	NA	Luminal A	4+	non-HER2A		1	0.409862	9.85534	10.2434	7.95295	8.31017
MB-0005	Positive	Positive	NA	Luminal B	3	non-HER2A		3	0.911517	9.69724	9.98483	7.82905	7.93744
MB-0006	Positive	Positive	0	Luminal B	9	non-HER2A		3	1.22959	10.383	10.2617	7.51898	6.93071
MB-0010	Positive	Positive	NA	Luminal B	7	non-HER2A		2	0.639084	9.80327	11.0715	7.05931	8.18352
MB-0014	Positive	Positive	NA	Luminal B	3	non-HER2A		2	0.748444	9.29843	10.7367	8.02825	7.50904
MB-0022	Positive	Negative	NA	Luminal B	3	non-HER2A		2	1.00453	8.69364	10.3175	6.91254	7.71247
MB-0025	Positive	Positive	NA	Luminal B	NA	HER2A		5	2.26623	10.9429	10.5307	7.27921	7.42572
MB-0039	Positive	Positive	NA	Luminal B	4+	non-HER2A		2	1.1294	9.49141	11.6165	7.41136	7.60815
MB-0045	Negative	Positive	NA	Basal-like	4-	non-HER2A	Negative	2	1.03693	9.6699	7.26474	7.04238	7.1366
MB-0054	Positive	Positive	NA	Luminal B	10	non-HER2A		5	1.8631	9.35043	10.1002	7.51638	6.93529
MB-0056	Positive	Positive	NA	Luminal B	1	non-HER2A		3	1.05306	8.77953	11.4267	7.21829	7.26286
MB-0059	Positive	Positive	NA	Luminal A	NA	non-HER2A		4	1.34855	10.9411	12.1671	8.5791	8.97939
MB-0060	Positive	Positive	NA	Luminal B	10	non-HER2A		4	1.19552	9.35043	8.44288	8.96305	7.66625
MB-0064	Positive	Positive	NA	Luminal B	3	non-HER2A		2	1.0372	8.53252	11.0916	8.39582	7.69971
MB-0066	Positive	Positive	NA	Luminal B	7	non-HER2A		4	1.12367	10.6295	11.1161	7.09108	8.35744
MB-0068	Positive	Positive	NA	Luminal A	3	non-HER2A		1	0.564552	9.06999	9.77124	7.23134	7.96118
MB-0081	Positive	Positive	NA	Luminal B	3	non-HER2A		2	1.05449	8.70162	9.34712	8.50369	7.46216
MB-0093	Positive	Positive	0	Luminal B	3	non-HER2A		2	1.07646	9.57631	8.8529	7.61375	7.29185
MB-0095	Positive	Positive	NA	Luminal B	8	non-HER2A		2	0.928715	10.2338	11.4293	8.68171	9.01612
MB-0099	Positive	Positive	0	Luminal B	NA	non-HER2A		3	0.856343	8.76674	9.25929	7.28806	7.58479
MB-0100	Negative	Negative	NA	Basal-like	10	non-HER2A	Negative	3	0.94092	8.99846	7.17984	6.72819	7.01235
MB-0106	Positive	Positive	NA	Luminal A	8	non-HER2A		2	0.724684	11.3891	10.1138	7.13548	7.8305
MB-0111	Positive	Positive	NA	Luminal A	3	non-HER2A		2	0.958674	10.6713	10.8776	7.12525	8.65774
MB-0112	Positive	Negative	NA	Luminal A	3	non-HER2A		1	0.590739	9.69587	9.40731	6.89151	7.33753
MB-0114	Positive	Positive	NA	Luminal A	8	non-HER2A		2	1.07646	11.505	10.5833	8.11745	8.19557
MB-0119	Positive	Negative	NA	Luminal B	7	non-HER2A		2	1.0372	10.9541	11.3965	6.89327	7.52469
MB-0121	Positive	Negative	NA	Luminal A	8	non-HER2A		2	0.89163	10.8358	10.784	6.92451	7.82868
MB-0123	Positive	Positive	NA	Luminal B	1	non-HER2A		2	0.707434	9.13861	11.4346	7.5302	7.92102
MB-0124	Positive	Positive	1	Luminal A	8	non-HER2A		2	1.02047	10.2849	9.31508	7.82432	8.20572
MB-0125	Positive	Positive	NA	Luminal B	8	non-HER2A		2	1.0599	10.4074	11.7768	8.65032	8.5623
MB-0129	Negative	Negative	3	HER2E	5	HER2A	Positive	12	4.91835	14.1225	7.20079	6.92945	8.29301
MB-0131	Positive	Negative	NA	Luminal A	8	non-HER2A		2	1.03693	11.357	10.6958	6.84361	8.83156
MB-0134	Positive	Negative	NA	Luminal B	8	non-HER2A		2	1.00453	8.12237	10.7906	6.83654	8.23289
MB-0135	Positive	Positive	NA	Luminal B	2	non-HER2A		2	1.14761	9.811	12.18	8.37616	8.29018
MB-0139	Positive	Positive	NA	Luminal A	3	non-HER2A		2	1.05449	10.8585	11.4293	8.68849	8.11332
MB-0140	Positive	Negative	NA	Luminal B	8	non-HER2A		2	1.11118	10.4746	10.9189	6.72882	8.13151
MB-0144	Positive	Positive	NA	Luminal B	8	non-HER2A		2	1.00428	10.3723	9.2203	7.12972	9.23317
MB-0147	Positive	Positive	NA	Luminal A	2	non-HER2A		2	1.11118	10.9541	10.5118	7.41012	8.8722
MB-0153	NA	Negative	NA	Basal-like	NA	non-HER2A		2	1.00428	9.46063	6.93756	6.86475	6.99836
MB-0158	Negative	Negative	NA	Basal-like	NA	non-HER2A	Positive	3	0.868622	9.76146	7.05386	6.7756	7.22271
MB-0159	NA	Negative	NA	Basal-like	NA	HER2A		6	3.06142	14.4438	6.94246	6.74858	7.46216
MB-0164	Negative	Negative	NA	Basal-like	10	non-HER2A	Negative	2	0.794502	9.10005	7.0027	6.80159	6.9359
MB-0165	Positive	Negative	3	Luminal A	5	HER2A		4.96774	2.57561	12.6317	9.63218	6.92924	8.17518
MB-0170	Positive	Negative	NA	Luminal A	3	non-HER2A		2	1.05449	11.4191	10.1373	6.79493	7.80469
MB-0174	Negative	Negative	1	Basal-like	4-	non-HER2A	Negative	3	0.989799	8.66644	6.88303	6.87446	6.94126
MB-0175	Positive	Negative	NA	Luminal A	6	non-HER2A		2	0.607678	9.60529	10.4423	6.76369	8.34577
MB-0176	Positive	Positive	1	Luminal A	1	non-HER2A		4	1.17655	10.9709	9.96539	7.77092	8.20305
MB-0177	Positive	Positive	NA	Luminal A	6	non-HER2A		2	1.05449	10.8376	10.0611	7.5444	7.96078
MB-0179	Negative	Negative	3	Basal-like	4-	non-HER2A	Negative	3	1.58173	11.966	7.77699	6.81502	7.69451
MB-0180	Positive	Positive	1	Luminal A	8	non-HER2A		3	1.13589	10.5361	10.6592	8.71577	8.44886
MB-0181	Positive	Positive	NA	Luminal A	7	non-HER2A		2	1.03693	9.41078	11.5595	8.21487	8.49116
MB-0184	Positive	Positive	1	Luminal A	4+	non-HER2A		2	1.07699	9.09685	12.4268	8.59847	8.06716
MB-0188	Positive	Negative	1	HER2E	3	non-HER2A		3	0.842751	10.197	7.70886	6.72109	8.78897
MB-0193	Positive	Positive	1	Luminal B	3	non-HER2A		2	1.03693	10.1929	9.47384	8.74353	8.19964
MB-0196	NA	Positive	NA	Basal-like	NA	non-HER2A		2	0.989074	10.2033	9.62199	7.53556	7.59094
MB-0198	Positive	Positive	1	Luminal B	8	non-HER2A		2	0.913974	9.82438	9.61123	8.27666	8.30225
MB-0199	Positive	Positive	NA	Luminal A	3	non-HER2A		2	1.16674	11.2791	10.4347	7.3675	7.93765
MB-0204	Positive	Negative	NA	Luminal A	3	non-HER2A		4	1.15816	10.7336	9.22005	6.83175	7.26793
MB-0207	Positive	Positive	NA	Luminal A	8	non-HER2A		2	1.0372	10.4037	9.2362	8.33309	8.66178
MB-0210	Positive	Negative	NA	Basal-like	NA	non-HER2A		2	1.09382	7.73663	7.1266	6.87667	7.06936
MB-0224	Positive	Positive	NA	Luminal A	4+	non-HER2A		2	1.03693	10.8157	8.94598	7.53427	8.14719
MB-0229	Positive	Positive	NA	Luminal A	7	non-HER2A		2	1.11118	10.7367	9.72021	8.54779	8.49948
MB-0235	Positive	Positive	NA	Luminal A	8	non-HER2A		2	0.943457	10.8776	9.85774	8.74062	8.7011
MB-0239	Positive	Positive	NA	Luminal A	3	non-HER2A		3	0.829583	10.1633	9.99371	9.58086	7.76453
MB-0241	Positive	Negative	1	Basal-like	4+	HER2A		5	2.01729	10.7432	8.28339	6.8871	7.05852
MB-0243	Positive	Positive	NA	Luminal B	8	non-HER2A		2	1.03693	10.4866	10.9522	8.01978	8.09779
MB-0247	Positive	Positive	NA	Luminal A	4+	non-HER2A		2	1.05393	10.1444	9.36706	8.17821	7.95636
MB-0248	Positive	Positive	NA	Luminal A	8	non-HER2A		2	0.943457	11.0834	11.0755	7.27452	8.53982
MB-0249	Negative	Negative	NA	HER2E	10	non-HER2A	Positive	3	1.01141	11.4971	7.07947	6.78102	7.89538
MB-0256	Positive	Positive	NA	Luminal A	3	non-HER2A		2	1.00428	10.5637	8.8617	8.21366	7.44104
MB-0257	Positive	Negative	NA	Luminal A	8	non-HER2A		4	1.51414	11.1059	11.2473	6.84262	8.26175
MB-0260	Positive	Positive	NA	Luminal A	3	non-HER2A		2	1.09354	9.78027	11.4242	7.51918	8.76404
MB-0261	Positive	Positive	NA	Luminal B	8	non-HER2A		2	1.07646	9.80173	11.2563	8.85747	8.94354
MB-0263	Positive	Positive	NA	Luminal A	7	non-HER2A		2	1.02047	10.4629	11.7669	7.03222	7.83288
MB-0264	NA	Negative	NA	HER2E	9	non-HER2A		3	1.72142	11.032	9.24026	6.80708	7.8647
MB-0266	NA	Positive	NA	Luminal A	8	non-HER2A		4	1.61383	10.1744	10.1573	7.7286	7.65778
MB-0268	Positive	Positive	NA	Luminal B	9	non-HER2A		5	1.42724	10.8776	11.6107	7.75032	8.09578
MB-0269	Negative	Negative	NA	Basal-like	4-	non-HER2A	Negative	2	1.0372	8.66345	7.05895	6.74973	7.02059
MB-0272	Positive	Negative	1	Luminal B	8	non-HER2A		2	1.07646	10.6867	10.6698	6.8369	8.46864
MB-0273	Positive	Negative	NA	Luminal A	8	non-HER2A		2	0.97439	10.8585	11.4064	6.80154	7.75845
MB-0284	NA	Negative	NA	Basal-like	10	non-HER2A		4	1.10583	9.70509	7.25849	6.87006	6.98814
MB-0286	Positive	Negative	NA	Luminal A	4+	non-HER2A		2	1.05393	10.0878	8.8422	6.91004	7.80914
MB-0289	Positive	Negative	NA	Basal-like	4-	non-HER2A		2	1.03693	7.95887	7.5971	6.84887	7.45069
MB-0291	Positive	Positive	NA	Luminal B	5	HER2A		8	2.63947	13.465	9.27954	7.3107	7.83087
MB-0295	Positive	Positive	NA	Luminal A	4+	non-HER2A		2	1.05393	10.6789	10.1138	8.69436	7.84438
MB-0299	NA	Negative	NA	Basal-like	NA	non-HER2A		2	0.724684	10.1867	6.89679	6.75083	6.95851
MB-0301	Positive	Positive	NA	Luminal A	7	non-HER2A		5	1.47068	11.0031	11.1556	7.39614	7.96764
MB-0303	Negative	Negative	NA	Basal-like	10	non-HER2A	Negative	4	1.14209	9.09729	7.63039	6.8343	7.05603
MB-0304	Positive	Positive	NA	Luminal B	6	non-HER2A		1	0.654603	9.77803	11.8542	8.26309	8.44089
MB-0307	Positive	Negative	NA	Luminal A	5	HER2A		5	2.59233	13.1922	8.09533	6.84439	7.35859
MB-0309	Positive	Positive	NA	Luminal A	8	non-HER2A		2	1.02047	10.7177	9.64497	7.67674	8.73748
MB-0313	Positive	Positive	NA	Luminal B	10	non-HER2A		1	0.54691	9.84977	10.0124	7.14319	8.62439
MB-0317	Positive	Positive	NA	Luminal A	7	non-HER2A		2	1.05393	10.3464	9.82121	7.70331	7.46406
MB-0319	Positive	Negative	NA	Luminal B	2	non-HER2A		2	1.09382	10.0205	12.4114	6.80373	8.64538
MB-0324	Positive	Positive	1	Luminal A	6	non-HER2A		3	1.5554	10.9765	10.4272	7.04336	7.11971
MB-0327	Positive	Positive	NA	Luminal A	NA	non-HER2A		2	0.806713	10.2466	11.4242	7.28022	8.39056
MB-0330	Positive	Negative	3	Basal-like	NA	HER2A		6	3.01283	12.8428	9.86258	6.76397	7.74786
MB-0339	NA	Positive	NA	Luminal B	4+	non-HER2A		4	1.14179	10.0278	12.0871	7.26086	8.14879
MB-0348	Positive	Positive	NA	Luminal A	8	non-HER2A		2	1.0372	10.5693	12.3126	9.98835	8.3257
MB-0349	Positive	Negative	NA	Luminal B	3	non-HER2A		1	0.527245	9.41421	11.6973	6.97687	8.76064
MB-0351	Positive	Negative	NA	Luminal B	NA	non-HER2A		2	1.07646	9.88535	9.61727	6.74772	8.44089
MB-0352	Positive	Negative	NA	HER2E	4-	non-HER2A		2	0.833163	10.6077	7.28748	6.74883	7.21106
MB-0353	Positive	Negative	NA	Luminal A	7	non-HER2A		2	1.05393	10.7956	8.75363	6.9359	8.40633
MB-0355	Positive	Positive	NA	Luminal A	NA	non-HER2A		4	1.15787	10.5991	9.56207	7.54634	7.62404
MB-0356	Positive	Positive	NA	Luminal A	8	non-HER2A		2	1.07646	10.0878	11.0855	7.28391	7.85276
MB-0359	Positive	Positive	NA	Luminal A	3	non-HER2A		2	1.02047	10.5623	10.0406	7.89568	8.43578
MB-0360	Positive	Positive	NA	Luminal B	7	non-HER2A		3	0.958627	10.6928	11.5374	7.82286	8.89356
MB-0361	Negative	Negative	NA	HER2E	5	HER2A	Positive	13	6.13247	13.8575	7.14131	6.81949	9.21307
MB-0362	Positive	Positive	1	Luminal A	2	non-HER2A		2	1.00453	10.8174	9.11348	7.13248	8.42813
MB-0364	Positive	Negative	1	Luminal A	4+	non-HER2A		2	0.724684	11.4267	9.31828	6.81438	8.10739
MB-0365	Positive	Negative	NA	HER2E	4+	HER2A		6	2.96575	12.5733	8.61399	6.79232	7.59918
MB-0366	Positive	Positive	NA	Luminal A	8	non-HER2A		4	1.31973	11.3165	10.9007	8.06256	7.53164
MB-0370	Positive	Negative	1	Luminal B	9	non-HER2A		3	1.58173	10.8022	11.4866	6.71186	7.64099
MB-0372	Negative	Negative	1	Basal-like	10	non-HER2A	Negative	1	0.479337	10.7384	7.24879	6.84389	7.29433
MB-0377	Positive	Positive	NA	Luminal A	4+	non-HER2A		2	1.0372	10.6005	10.4347	7.06436	7.76557
MB-0379	Positive	Negative	NA	Luminal A	7	non-HER2A		3	0.806503	10.1919	9.05121	7.03479	8.3103
MB-0380	Positive	Positive	NA	Luminal B	9	non-HER2A		1	0.574111	9.32798	12.2467	7.06164	8.44346
MB-0381	Positive	Negative	3	HER2E	5	HER2A		10	4.31771	14.4793	8.46486	6.76939	7.50958
MB-0382	Positive	Negative	1	Luminal A	3	non-HER2A		1	0.464358	10.45	9.15435	7.02621	8.58921
MB-0384	Positive	Positive	NA	Luminal B	8	non-HER2A		1	0.518466	9.11302	11.6224	7.53178	8.48851
MB-0385	Positive	Negative	1	Luminal B	9	non-HER2A		3	1.48288	11.0795	10.6943	6.90287	8.21789
MB-0391	Negative	Negative	3	HER2E	1	HER2A	Positive	4	2.10898	13.2415	7.18015	6.82861	9.21802
MB-0397	Positive	Positive	NA	Luminal A	4+	non-HER2A		2	1.03693	10.5374	10.3903	7.93546	8.45969
MB-0398	Positive	Negative	2	Luminal B	6	non-HER2A		4	1.17655	10.426	10.3142	6.88403	9.07999
MB-0400	Negative	Negative	1	Basal-like	10	non-HER2A	Negative	1	0.416581	8.79447	6.94872	6.85335	6.93804
MB-0403	NA	Negative	NA	Basal-like	NA	non-HER2A		2	1.03693	8.19653	7.18646	6.85077	7.23818
MB-0404	Positive	Positive	NA	Luminal A	8	non-HER2A		4	1.19552	10.1168	10.5401	8.53162	8.3521
MB-0405	Positive	Positive	NA	Luminal B	NA	non-HER2A		2	1.00428	9.80942	10.218	7.88583	8.31498
MB-0406	Positive	Negative	2	Luminal B	2	non-HER2A		2	1.11118	10.5806	10.4866	7.04021	7.13555
MB-0408	Positive	Positive	NA	Luminal A	NA	non-HER2A		2	1.00428	10.5374	10.237	7.97128	8.45855
MB-0411	Positive	Negative	1	Luminal A	6	non-HER2A		1	0.527245	9.61863	9.88041	6.97233	7.5202
MB-0413	Positive	Positive	1	Luminal A	2	non-HER2A		2	1.07699	10.0097	10.1265	7.43026	8.42267
MB-0418	Positive	Negative	NA	HER2E	9	non-HER2A		2	1.14761	10.969	9.84738	6.9055	8.78168
MB-0419	Positive	Positive	NA	Luminal A	8	non-HER2A		4	1.21536	10.5212	12.4477	8.19511	8.85596
MB-0421	Positive	Positive	NA	HER2E	5	HER2A		11	3.57166	13.791	9.50728	7.08821	7.59204
MB-0422	Positive	Positive	NA	Luminal A	8	non-HER2A		2	0.863542	10.3664	10.7563	8.50576	8.35744
MB-0425	Positive	Positive	NA	Luminal A	3	non-HER2A		2	0.989074	10.4423	11.0418	7.31879	7.76712
MB-0427	Positive	Negative	NA	Luminal A	7	non-HER2A		2	1.09382	10.2127	11.568	6.88233	8.77917
MB-0431	Positive	Negative	NA	Luminal A	3	non-HER2A		3	1.29531	11.1244	10.0545	6.7723	7.89251
MB-0435	Positive	Negative	NA	Basal-like	NA	non-HER2A		2	1.05393	8.16766	7.04117	6.77848	7.08943
MB-0436	Negative	Negative	1	HER2E	4-	non-HER2A	Negative	1	0.510237	9.77277	7.18575	6.8778	7.50691
MB-0439	Positive	Positive	NA	Luminal B	8	non-HER2A		2	1.0372	9.57376	10.2221	8.07831	8.00198
MB-0444	Positive	Positive	1	Luminal B	8	non-HER2A		3	0.958868	9.68744	10.0489	7.20168	7.8138
MB-0445	Positive	Positive	1	Luminal A	7	non-HER2A		2	1.11118	10.4526	9.95681	7.77092	7.92828
MB-0446	Negative	Negative	1	Basal-like	10	non-HER2A	Negative	4	1.10611	10.1898	7.04915	6.85557	6.96989
MB-0448	Positive	Positive	NA	Luminal B	NA	non-HER2A		5	1.59771	11.432	10.6622	7.11053	8.44774
MB-0452	Positive	Negative	NA	Luminal B	9	HER2A		5	2.39668	10.9596	9.83847	7.00868	8.32596
MB-0454	Positive	Positive	NA	Luminal A	3	non-HER2A		2	1.03693	10.0954	12.9799	8.19343	8.25102
MB-0459	Positive	Negative	NA	Luminal B	6	non-HER2A		3	0.990057	10.2253	11.7353	6.85743	7.21596
MB-0460	Positive	Positive	NA	Luminal A	4+	non-HER2A		2	1.05393	9.68812	9.83453	7.71744	7.40727
MB-0463	Positive	Positive	NA	Luminal A	4+	non-HER2A		2	1.0372	10.4707	11.0378	7.3765	8.69506
MB-0470	Positive	Negative	NA	Basal-like	4-	non-HER2A		2	1.03693	7.6101	6.81388	6.78487	7.07217
MB-0471	Positive	Positive	NA	Luminal A	1	non-HER2A		4	1.51452	11.0457	11.0834	7.11342	7.41667
MB-0472	Positive	Positive	NA	Luminal B	7	non-HER2A		2	1.07699	11.1202	12.5228	7.62245	9.44694
MB-0475	Positive	Positive	NA	Luminal A	9	non-HER2A		3	1.10456	10.1129	8.1555	7.45264	7.98046
MB-0478	Positive	Positive	NA	Luminal A	3	non-HER2A		2	1.0372	10.8174	11.1223	7.24862	7.67832
MB-0480	Positive	Negative	NA	Luminal A	9	non-HER2A		3	1.06977	11.1856	11.9622	6.91839	8.93867
MB-0483	Positive	Positive	2	Luminal B	1	non-HER2A		2	1.0599	10.4296	10.2772	7.25941	7.90172
MB-0485	Positive	Negative	1	Luminal A	9	non-HER2A		4	1.12367	10.5637	9.79712	6.83502	7.74778
MB-0486	Positive	Positive	1	Luminal A	3	non-HER2A		2	1.05393	11.3308	12.5011	7.9626	9.1481
MB-0488	Positive	Positive	NA	Basal-like	4+	non-HER2A		2	1.07699	10.037	8.29301	7.6245	7.34256
MB-0490	Positive	Positive	NA	Luminal A	4+	non-HER2A		2	1.03693	10.565	11.2791	7.78293	8.24494
MB-0491	Positive	Positive	NA	Luminal A	4+	non-HER2A		2	1.1294	10.3916	8.8679	7.32954	7.93705
MB-0492	Positive	Positive	NA	Luminal B	8	non-HER2A		2	1.00453	10.1177	12.4636	7.13317	8.24915
MB-0495	Positive	Negative	1	Basal-like	4-	non-HER2A		2	1.02047	9.54109	7.98231	6.80489	7.11503
MB-0497	Positive	Positive	NA	Luminal A	4+	non-HER2A		3	1.66677	12.079	10.2054	7.4259	8.83079
MB-0499	Positive	Negative	NA	Basal-like	NA	non-HER2A		2	1.05393	8.14765	7.32107	6.72333	7.17525
MB-0500	Positive	Negative	1	Basal-like	10	non-HER2A		2	0.702038	9.75107	6.99364	6.90046	7.08682
MB-0501	Positive	Positive	NA	Luminal A	8	non-HER2A		3	1.5554	10.6989	10.3291	7.40834	8.61071
MB-0502	Positive	Negative	1	Basal-like	4-	non-HER2A		2	1.05393	7.62994	6.95868	6.87318	7.12972
MB-0503	Positive	Positive	NA	Luminal A	7	non-HER2A		5	1.62348	11.3475	10.9935	7.86976	8.48649
MB-0506	Negative	Positive	1	HER2E	9	non-HER2A	Positive	2	1.07646	11.8966	6.98746	7.05132	7.12355
MB-0509	Positive	Positive	NA	Basal-like	3	non-HER2A		2	1.03693	10.9503	9.14712	8.25441	7.75561
MB-0511	Positive	Positive	NA	Luminal A	3	non-HER2A		2	0.988584	9.84175	11.0634	8.32808	8.66026
MB-0512	Positive	Positive	NA	Luminal A	9	non-HER2A		2	1.02047	10.4074	9.8731	8.12661	7.85518
MB-0513	Positive	Positive	NA	Luminal A	9	non-HER2A		2	0.943457	10.4037	11.9399	8.06085	7.9922
MB-0514	Positive	Positive	1	Luminal B	3	non-HER2A		2	1.09382	11.0378	9.23721	7.88395	9.04717
MB-0517	Positive	Positive	NA	Luminal A	9	non-HER2A		1	0.564552	9.8228	10.0677	8.20499	8.54469
MB-0521	Positive	Positive	1	Luminal A	3	non-HER2A		2	1.07699	10.421	8.58321	8.12375	8.01471
MB-0522	Negative	Negative	NA	HER2E	5	HER2A	Positive	11	3.92348	13.9344	7.44443	6.82316	8.27946
MB-0525	Negative	Negative	NA	Basal-like	4-	non-HER2A	Positive	2	0.958674	9.64432	6.94421	6.7253	8.32518
MB-0527	Positive	Positive	NA	Luminal A	4+	non-HER2A		2	1.0372	9.82675	11.2814	8.88442	8.12064
MB-0529	Positive	Positive	NA	Luminal A	8	non-HER2A		4	1.39205	11.2142	11.5595	7.55543	9.02214
MB-0538	Positive	Positive	NA	Luminal A	9	non-HER2A		4	1.7545	10.8324	9.66435	7.58252	7.34175
MB-0539	NA	Negative	NA	Basal-like	NA	HER2A		5	2.63622	13.9344	7.01478	6.89615	7.52054
MB-0541	Positive	Negative	NA	Luminal A	9	non-HER2A		2	1.0372	10.3349	10.4074	6.96208	7.88738
MB-0544	Positive	Positive	NA	Luminal B	8	non-HER2A		2	1.07646	10.0205	11.6224	7.16825	8.18935
MB-0547	Positive	Positive	NA	Luminal B	NA	non-HER2A		3	0.882409	10.0205	10.6502	7.29502	7.91118
MB-0550	Positive	Negative	NA	Luminal B	8	non-HER2A		2	0.617323	9.27954	9.73628	6.78261	8.58415
MB-0553	Positive	Negative	NA	Luminal A	5	HER2A		7	3.35536	14.6688	11.2009	6.82253	7.95936
MB-0554	Positive	Positive	NA	Luminal A	8	non-HER2A		2	0.877249	10.426	10.5976	7.25872	8.17797
MB-0558	Negative	Negative	NA	Basal-like	10	non-HER2A	Negative	3	0.882409	8.43492	6.98363	6.79861	6.80371
MB-0569	Positive	Positive	NA	Luminal B	4+	non-HER2A		2	1.1294	10.2894	10.565	8.4094	8.22164
MB-0571	Positive	Positive	NA	Luminal A	7	non-HER2A		2	1.00453	10.295	10.0251	7.43426	8.31421
MB-0573	Positive	Positive	NA	Luminal A	7	non-HER2A		3	0.925985	9.57887	8.73196	7.11017	7.55756
MB-0574	Positive	Positive	NA	Luminal A	2	non-HER2A		4	1.09268	10.9935	12.6613	7.88699	9.25569
MB-0577	Positive	Negative	NA	Luminal B	7	non-HER2A		3	1.5554	10.2595	12.3859	6.88759	8.44574
MB-0580	Positive	Positive	2	Luminal A	4+	non-HER2A		5.71429	1.98916	11.2187	10.2263	8.50398	8.03525
MB-0584	Positive	Positive	NA	Luminal B	7	non-HER2A		4	1.21536	10.9746	9.79403	7.75288	7.86095
MB-0586	Positive	Negative	NA	Luminal A	6	non-HER2A		2	1.07699	10.9992	11.9473	6.85833	7.79867
MB-0587	Positive	Positive	1	Luminal A	9	non-HER2A		4	1.85696	10.582	10.6179	8.83875	8.26735
MB-0589	Positive	Negative	NA	Luminal B	5	HER2A		4	2.07387	12.5844	10.063	6.84349	8.13331
MB-0591	Positive	Negative	NA	Luminal B	8	non-HER2A		3	1.08703	10.2606	11.1472	6.8861	7.93132
MB-0592	Positive	Positive	NA	Luminal B	NA	non-HER2A		4	1.14209	9.78783	12.2514	8.98147	8.8228
MB-0593	Negative	Negative	3	HER2E	5	HER2A	Positive	7	2.91531	14.2728	7.41763	6.88002	7.51618
MB-0594	Positive	Negative	NA	Luminal B	4+	non-HER2A		1	0.581651	9.97509	8.88365	6.78572	8.43803
MB-0596	Positive	Positive	NA	Luminal A	3	non-HER2A		3	0.990057	9.9733	10.5092	7.27765	8.60138
MB-0598	Positive	Positive	NA	Luminal B	3	non-HER2A		2	0.757069	10.6713	9.94478	7.15747	8.30769
MB-0599	Positive	Negative	1	Luminal A	4-	non-HER2A		1	0.518601	9.14051	7.94814	6.7953	7.16271
MB-0600	Positive	Negative	NA	Luminal A	6	non-HER2A		2	1.05393	10.8022	12.0667	6.86108	7.87391
MB-0601	Positive	Negative	1	Luminal B	10	non-HER2A		1	0.591032	9.57112	8.4523	6.84551	7.67149
MB-0603	Positive	Positive	NA	Luminal A	7	non-HER2A		2	1.07699	10.7514	11.3427	7.78824	8.03972
MB-0605	Positive	Positive	NA	Luminal A	8	non-HER2A		2	1.09382	10.724	10.8672	8.10537	8.17095
MB-0606	Positive	Negative	NA	Luminal B	3	non-HER2A		2	1.09354	9.62874	12.3173	6.87645	7.85647
MB-0607	Positive	Positive	3	Luminal A	4+	HER2A		4	2.04095	11.6165	10.37	7.5185	8.48982
MB-0608	Negative	Negative	1	Basal-like	10	non-HER2A	Negative	3	0.896642	10.9282	7.13284	6.70382	6.80787
MB-0609	Positive	Negative	1	Luminal A	8	non-HER2A		2	0.833163	10.1364	11.114	7.02712	8.10001
MB-0610	Positive	Negative	NA	Luminal A	4+	non-HER2A		2	1.05393	10.9858	10.3119	6.75762	7.10746
MB-0613	Negative	Negative	1	Basal-like	4-	non-HER2A	Negative	2	0.607525	8.95343	6.96597	6.85341	7.12346
MB-0614	Positive	Positive	1	Luminal A	6	non-HER2A		4	1.09268	9.87555	9.68497	7.54592	7.83876
MB-0616	Positive	Negative	NA	Luminal B	7	non-HER2A		4	1.44937	10.8123	10.0687	6.95351	9.00492
MB-0621	Positive	Positive	NA	Luminal A	4+	non-HER2A		2	1.07699	10.6179	9.81728	7.14227	8.30071
MB-0624	Positive	Negative	NA	Luminal A	3	non-HER2A		4	1.12367	10.8157	10.3131	6.96419	8.31147
MB-0627	Negative	Negative	2	Basal-like	4-	non-HER2A	Negative	2	1.05393	9.7637	7.19169	6.81401	7.06063
MB-0631	Positive	Positive	NA	Luminal A	8	non-HER2A		3	0.868403	10.1012	11.8682	8.00968	8.54348
MB-0632	Positive	Negative	NA	Luminal A	4+	non-HER2A		4	1.07534	10.7923	8.20522	6.79442	7.85221
MB-0635	Positive	Negative	NA	Basal-like	NA	non-HER2A		2	1.07646	7.7886	7.26859	6.76551	7.046
MB-0636	Positive	Positive	1	Luminal A	6	non-HER2A		1	0.573807	9.73925	9.89942	8.39003	8.09334
MB-0637	Positive	Positive	NA	Luminal B	10	non-HER2A		3	1.08703	9.08044	8.98951	7.48026	7.57343
MB-0642	Positive	Positive	NA	Luminal A	8	non-HER2A		2	1.02047	10.9877	12.3859	8.07656	8.73818
MB-0643	Positive	Negative	NA	HER2E	5	HER2A		5.95238	2.00676	13.3423	6.99596	6.78142	8.2
MB-0646	Positive	Negative	1	Luminal B	8	non-HER2A		2	1.03693	10.1099	10.8005	6.8416	7.80007
MB-0649	Positive	Positive	NA	Luminal A	7	non-HER2A		2	1.03693	10.2413	9.55504	7.88757	8.12283
MB-0650	Positive	Negative	1	Luminal A	2	non-HER2A		4	1.07534	10.2585	11.2407	6.84762	8.2033
MB-0652	Positive	Positive	NA	HER2E	5	HER2A		9	3.368	12.5173	8.44288	6.64063	7.5502
MB-0653	Positive	Negative	NA	HER2E	9	non-HER2A		3	1.61469	11.6372	7.41381	6.7893	7.81579
MB-0654	Positive	Positive	NA	Luminal A	8	non-HER2A		2	1.02047	10.4234	12.0389	8.55032	8.49203
MB-0660	Positive	Negative	1	HER2E	10	non-HER2A		3	0.842751	10.5778	7.48182	6.88253	8.6046
MB-0663	Negative	Negative	3	HER2E	5	HER2A	Positive	9	3.03346	14.5168	7.10101	6.80301	8.40493
MB-0667	Positive	Positive	NA	Luminal B	NA	HER2A		5	2.43597	12.6257	11.2318	7.21509	8.00637
MB-0869	Negative	Negative	NA	Basal-like	10	non-HER2A	Negative	1	0.600267	9.48899	6.87637	6.94823	7.01869
MB-0876	NA	Negative	NA	Basal-like	NA	non-HER2A		2	1.07699	8.67114	7.42413	6.87101	7.31959
MB-0880	Positive	Positive	NA	Luminal A	7	non-HER2A		2	1.07646	10.8427	10.5388	8.63156	8.31968
MB-0893	Positive	Negative	NA	Basal-like	4-	non-HER2A		2	1.09382	7.77839	7.04662	6.80272	7.13654
MB-2513	Negative	Negative	3	Luminal A	5	HER2A	Positive	10	4.09862	13.9543	7.20298	6.97644	7.25184
MB-2564	Positive	Positive	1	Luminal A	8	non-HER2A		2	1.07646	10.2728	9.79481	7.12009	7.71861
MB-2617	Positive	Negative	1	Luminal B	4+	non-HER2A		1	0.538496	9.44577	11.0815	6.88062	7.85638
MB-2626	Positive	Positive	3	Luminal B	5	HER2A		9	2.8235	13.0403	9.84898	7.38197	7.61129
MB-2629	Positive	Negative	1	Luminal B	3	non-HER2A		2	1.11118	10.4945	12.2106	6.92566	7.30317
MB-2632	Negative	Negative	3	HER2E	5	HER2A	Positive	8	2.99378	14.2321	6.85186	6.777	7.32045
MB-2643	NA	Negative	NA	Basal-like	4-	non-HER2A		2	1.05393	8.01408	7.02612	6.80933	6.96267
MB-2669	Positive	Negative	1	Luminal A	6	non-HER2A		4	1.12367	10.8022	9.80864	6.72829	6.97555
MB-2705	Positive	Negative	1	Luminal B	3	non-HER2A		2	1.07646	10.7352	11.2407	6.82887	8.29583
MB-2708	Positive	Positive	2	Luminal B	7	non-HER2A		2	0.781688	9.64773	9.77277	7.37401	7.27371
MB-2711	Positive	Positive	1	Luminal A	7	non-HER2A		2	0.958923	10.7224	10.0945	7.57724	7.71795
MB-2712	Positive	Positive	1	Luminal A	7	non-HER2A		2	1.0372	10.8256	9.57049	7.68837	7.81219
MB-2720	Negative	Positive	3	Luminal B	NA	non-HER2A	Positive	4	1.19552	10.6928	9.7385	7.02173	7.56867
MB-2721	Negative	Positive	1	Luminal A	7	non-HER2A	Positive	1	0.555591	10.1781	10.0178	8.06783	8.51265
MB-2724	Negative	Negative	3	Basal-like	4-	non-HER2A	Positive	2	1.0372	7.47701	7.15059	6.74761	6.86392
MB-2725	Positive	Positive	1	Luminal A	4+	non-HER2A		2	1.03693	10.2739	10.4309	8.7213	7.63807
MB-2728	Negative	Positive	1	Luminal B	9	non-HER2A	Positive	4	1.29878	10.3337	9.9491	7.02498	7.52682
MB-2735	Negative	Negative	2	Luminal B	6	HER2A	Negative	4	2.40107	11.177	9.07407	6.91162	7.96361
MB-2742	Negative	Negative	1	HER2E	5	HER2A	Negative	11	4.29928	13.8289	7.04313	6.82422	7.42065
MB-2745	Positive	Positive	2	Luminal A	8	non-HER2A		2	1.03693	11.4267	11.2473	8.0376	7.66809
MB-2747	Positive	Positive	1	Luminal A	8	non-HER2A		2	1.02047	10.8157	11.7702	7.30055	7.86741
MB-2750	Positive	Negative	1	Luminal A	8	non-HER2A		3	1.50641	11.5993	10.048	6.8689	7.56731
MB-2752	Positive	Positive	1	Luminal A	7	non-HER2A		3	0.882409	10.063	10.3771	7.93447	7.29716
MB-2758	Negative	Negative	2	Basal-like	4-	HER2A	Positive	5	2.55118	12.7101	7.04609	6.83809	7.67729
MB-2760	Positive	Positive	NA	Luminal B	7	non-HER2A		2	1.0372	9.87472	11.3766	7.95275	8.00906
MB-2763	Positive	Positive	1	Luminal B	4+	non-HER2A		2	1.02047	10.198	12.1587	7.8296	7.91742
MB-2767	Positive	Positive	1	Luminal B	2	non-HER2A		2	1.21959	10.1187	9.11071	7.15626	7.51253
MB-2769	Positive	Positive	1	Luminal B	7	non-HER2A		2	1.09354	10.1755	11.7384	7.31024	7.64393
MB-2770	Positive	Positive	1	Luminal A	8	non-HER2A		2	1.02047	9.7637	10.8393	8.79852	7.57183
MB-2772	Positive	Positive	1	Luminal B	6	non-HER2A		2	1.16674	9.8236	10.0215	7.14454	7.26502
MB-2786	Positive	Negative	3	Luminal A	5	HER2A		9	4.17922	13.6989	11.3791	7.07434	7.83124
MB-2790	Positive	Positive	1	Luminal A	8	non-HER2A		2	1.00428	9.9052	9.94739	8.0856	8.40381
MB-2791	Positive	Positive	NA	Luminal A	3	non-HER2A		2	1.0372	10.9429	9.95765	7.66911	8.19248
MB-2795	Positive	Negative	1	Luminal B	1	non-HER2A		2	1.02047	9.53293	9.52666	7.04194	7.03904
MB-2797	Positive	Positive	1	Luminal A	6	non-HER2A		2	1.09354	11.0956	10.5442	7.2333	7.39268
MB-2803	Positive	Negative	1	Luminal B	8	non-HER2A		2	1.02047	9.99637	11.2883	6.86692	7.94944
MB-2814	Positive	Positive	1	Luminal B	3	non-HER2A		2	1.0372	10.9007	11.9733	7.56774	8.2504
MB-2820	Positive	Positive	1	Luminal A	3	non-HER2A		2	0.863542	10.7906	10.0406	7.10855	7.87484
MB-2821	Negative	Positive	1	Basal-like	4-	non-HER2A	Negative	2	1.05449	8.68883	7.08827	6.96933	7.03334
MB-2827	Negative	Negative	1	Basal-like	10	non-HER2A	Negative	3	0.842751	9.7652	6.96313	6.92467	6.97602
MB-2834	Positive	Negative	1	HER2E	3	non-HER2A		3	0.882409	10.063	7.05743	6.85975	7.94894
MB-2838	Positive	Positive	1	Luminal A	8	non-HER2A		2	1.02047	9.97596	10.1334	8.63418	7.59145
MB-2845	Positive	Negative	1	Luminal A	4+	non-HER2A		4	1.05827	9.63218	9.96976	6.8924	7.67753
MB-2846	Negative	Negative	NA	Basal-like	4+	non-HER2A	Positive	3	0.911341	10.1354	8.75416	6.78018	7.19797
MB-2848	Positive	Positive	1	Luminal A	3	non-HER2A		2	1.14822	10.814	9.36819	7.73036	7.71184
MB-2850	Negative	Negative	1	Basal-like	10	non-HER2A	Negative	2	1.02047	8.80224	7.0251	6.98088	6.96958
MB-2853	Positive	Negative	1	Luminal B	6	non-HER2A		2	1.20023	10.0315	10.1002	6.86948	7.33436
MB-2858	Positive	Positive	1	Luminal B	1	non-HER2A		4	1.23465	10.9541	10.4642	7.48679	7.80647
MB-2863	Positive	Negative	1	Luminal A	4+	non-HER2A		2	1.0372	10.6789	11.0378	6.76665	7.65841
MB-2867	Positive	Positive	1	Luminal A	4+	non-HER2A		2	1.0372	10.1544	9.88453	8.15784	7.59918
MB-2895	Negative	Negative	2	Basal-like	5	HER2A	Positive	4	2.07441	13.1269	7.27261	6.85201	7.09719
MB-2901	Positive	Positive	1	Luminal B	8	non-HER2A		3	0.974088	10.2149	11.212	7.69321	7.18898
MB-2916	Positive	Positive	1	Luminal A	3	non-HER2A		2	1.07646	10.1503	9.1339	8.62274	7.39882
MB-2919	Positive	Positive	1	Luminal B	8	non-HER2A		2	1.03693	10.2838	11.4293	7.00048	7.71192
MB-2923	Negative	Negative	3	HER2E	5	HER2A	Positive	8	2.24733	14.2321	6.90026	6.75437	8.02105
MB-2933	Positive	Positive	1	Luminal A	3	non-HER2A		2	1.05393	10.7694	10.7563	7.71531	8.00324
MB-2944	Negative	Positive	1	Luminal A	8	non-HER2A	Positive	2	0.684975	10.2359	11.0378	7.1603	8.08094
MB-2947	Positive	Positive	1	Luminal A	4+	non-HER2A		2	1.05393	9.47443	11.0457	9.09594	7.42499
MB-2952	Positive	Positive	1	Luminal A	8	non-HER2A		1	0.564699	10.9858	12.279	7.06002	7.54495
MB-2953	Positive	Positive	1	Luminal B	10	non-HER2A		3	0.829374	9.06418	8.751	7.21432	7.58318
MB-2954	Positive	Positive	1	Luminal B	8	non-HER2A		2	1.05393	9.61999	11.2768	7.17169	7.45738
MB-2957	Negative	Negative	1	Basal-like	10	non-HER2A	Negative	3	0.806503	9.14143	6.97507	6.78599	6.85065
MB-2960	Positive	Negative	1	Luminal A	6	non-HER2A		2	1.09382	9.89195	11.6194	6.84613	7.53898
MB-2963	Positive	Negative	1	HER2E	4-	non-HER2A		2	1.0372	10.2263	7.54313	6.9144	7.26803
MB-2964	Positive	Negative	NA	HER2E	5	HER2A		9	2.9694	12.5339	8.38129	6.79707	7.13181
MB-2966	Positive	Positive	1	Luminal A	8	non-HER2A		3	0.925985	9.72456	10.2617	8.08934	7.50478
MB-2971	Positive	Positive	1	Luminal A	3	non-HER2A		2	1.07646	10.3453	11.0186	7.53661	7.88984
MB-2977	Positive	Positive	1	Luminal A	7	non-HER2A		2	0.928715	10.2106	9.22607	8.19464	7.6937
MB-2983	Positive	Positive	NA	Luminal B	5	HER2A		8	2.85272	13.9843	10.4681	8.45259	7.68068
MB-2984	Positive	Negative	NA	Luminal B	9	HER2A		7	3.41217	12.802	10.4919	6.8055	7.97189
MB-2990	Positive	Positive	1	Luminal A	8	non-HER2A		2	1.05449	11.4191	11.0378	7.54669	7.49074
MB-2996	Positive	Positive	1	Luminal A	7	non-HER2A		2	1.14761	10.343	11.5104	8.57517	7.79282
MB-3005	Positive	Positive	1	Luminal A	8	non-HER2A		3	0.911287	10.2402	10.0658	7.72244	7.9626
MB-3016	Positive	Positive	1	Luminal B	2	non-HER2A		2	0.736564	9.63816	11.3331	7.13851	7.12401
MB-3021	Positive	Positive	1	Luminal A	8	non-HER2A		2	1.07646	9.7788	11.3865	10.0858	8.77809
MB-3026	Positive	Negative	1	Luminal A	6	non-HER2A		2	1.07646	9.94224	11.7353	6.98932	7.31055
MB-3031	Negative	Negative	3	HER2E	5	HER2A	Positive	4	2.29523	13.8669	8.23386	6.86564	7.4885
MB-3032	Positive	Positive	1	Luminal A	3	non-HER2A		2	1.02047	9.75476	9.39413	7.87903	7.64338
MB-3035	Positive	Negative	1	Luminal A	7	non-HER2A		1	0.574111	9.98043	9.85134	6.9682	7.89942
MB-3037	Positive	Positive	1	Luminal A	3	non-HER2A		2	1.02047	10.0025	10.5862	9.20212	8.94233
MB-3046	Negative	Negative	1	Basal-like	10	non-HER2A	Negative	3	1.21007	10.3027	7.11472	6.73649	7.16666
MB-3049	Positive	Positive	1	Luminal A	7	non-HER2A		2	1.05393	10.5052	9.1216	7.23938	7.94755
MB-3079	Positive	Positive	2	Luminal A	8	non-HER2A		2	1.07646	11.2745	10.047	8.21679	7.75458
MB-3088	Positive	Positive	1	Luminal A	7	non-HER2A		2	1.11118	11.4191	11.5737	7.53427	7.63084
MB-3092	Positive	Positive	1	Luminal B	8	non-HER2A		2	1.05449	10.682	11.9622	7.53508	8.59716
MB-3102	Positive	Positive	1	Luminal A	9	non-HER2A		4	1.15816	11.0517	10.6607	7.1981	7.91118
MB-3103	Positive	Negative	3	Luminal B	5	HER2A		10	3.48102	14.4271	10.7579	6.89975	7.793
MB-3104	Positive	Negative	1	Luminal A	5	HER2A		5	2.73386	12.704	9.50422	7.03098	7.92004
MB-3105	Positive	Positive	1	Luminal A	3	non-HER2A		2	0.989074	11.0795	9.80632	9.09456	8.46027
MB-3121	Positive	Positive	1	Luminal A	3	non-HER2A		3	1.02746	10.3559	11.5183	7.92858	8.09423
MB-3123	Negative	Negative	1	Basal-like	9	HER2A	Negative	9	2.64723	11.9362	6.97211	6.70514	7.01299
MB-3167	Positive	Positive	1	Luminal A	8	non-HER2A		4	1.7545	11.6049	11.9	7.15791	7.80042
MB-3222	Negative	Positive	1	Luminal A	7	non-HER2A	Negative	2	1.05393	10.4564	8.92123	8.16789	7.5476
MB-3228	Positive	Positive	1	Luminal A	4+	non-HER2A		2	1.07699	11.1954	10.4462	7.42753	9.15482
MB-3252	Positive	Positive	1	Luminal A	3	non-HER2A		2	1.03693	10.7068	10.3605	8.04768	7.57457
MB-3271	Negative	Negative	1	Basal-like	10	non-HER2A	Negative	3	0.925985	9.09502	7.21239	6.75709	6.91222
MB-3275	Positive	Positive	1	Luminal B	1	non-HER2A		2	0.724684	9.61321	9.65111	7.18391	7.17056
MB-3277	Negative	Negative	1	Basal-like	1	non-HER2A	Negative	3	0.856343	8.97018	7.48092	6.84501	7.07973
MB-3292	Negative	Negative	NA	Basal-like	10	non-HER2A	Negative	2	1.07699	9.46479	7.21102	6.92864	6.87435
MB-3297	Negative	Negative	1	Basal-like	10	non-HER2A	Negative	2	0.76928	9.18292	7.91626	6.91326	6.93728
MB-3298	Positive	Positive	1	Luminal A	3	non-HER2A		4	1.27817	10.4694	11.3117	7.17991	7.7459
MB-3300	Positive	Negative	1	Luminal B	7	non-HER2A		2	1.03693	10.3131	11.6578	6.98541	7.54042
MB-3301	Positive	Positive	NA	Luminal B	8	non-HER2A		2	1.02047	10.4062	10.1314	8.26698	7.33144
MB-3303	Positive	Positive	NA	Luminal B	4+	non-HER2A		3	1.15392	10.3652	10.7005	7.31693	7.36941
MB-3341	Positive	Positive	1	Luminal A	8	non-HER2A		2	0.748444	9.45639	11.4242	7.67942	7.87789
MB-3344	Positive	Positive	1	Luminal A	3	non-HER2A		2	1.03693	10.9652	10.9858	8.04315	8.24817
MB-3350	Positive	Positive	1	Luminal B	3	non-HER2A		2	1.09382	9.73775	11.7036	7.92172	7.93054
MB-3355	Negative	Negative	3	HER2E	5	HER2A	Positive	14	5.64699	14.2321	6.95198	6.78079	8.34255
MB-3361	Positive	Negative	2	Luminal B	5	HER2A		6	3.23098	14.0885	10.93	7.00696	8.33309
MB-3363	Positive	Negative	1	Basal-like	10	non-HER2A		2	0.97439	9.89859	8.17917	6.80077	7.03133
MB-3365	Positive	Positive	1	Luminal A	7	non-HER2A		2	1.11118	9.70942	10.8273	9.1443	7.91926
MB-3371	Positive	Negative	1	Luminal B	8	non-HER2A		4	1.25456	11.7226	10.6728	6.98657	7.88603
MB-3378	Positive	Positive	1	Luminal A	4+	non-HER2A		2	1.05393	10.4629	11.7801	7.3245	7.69031
MB-3379	Positive	Positive	2	Luminal A	5	HER2A		10	3.48102	13.0792	11.4242	7.05244	8.04941
MB-3381	Positive	Positive	1	Luminal A	7	non-HER2A		3	1.43838	10.6943	9.37373	7.21981	7.61586
MB-3382	Positive	Negative	3	Luminal B	5	HER2A		9	3.51851	13.2907	9.42177	6.83251	7.58237
MB-3402	Negative	Positive	2	Luminal B	1	HER2A	Positive	9	3.51851	11.9622	10.2221	8.49619	8.32702
MB-3403	Positive	Positive	1	Luminal A	3	non-HER2A		2	1.09382	10.4488	9.86015	7.86825	8.29326
MB-3412	Positive	Negative	3	Luminal A	8	non-HER2A		2	1.0372	10.7384	11.1856	6.96528	7.89328
MB-3417	Positive	Positive	1	Luminal B	7	non-HER2A		2	1.09354	10.3759	12.7297	8.88997	7.97311
MB-3430	Positive	Positive	1	Luminal A	3	non-HER2A		2	1.00453	10.8445	9.90105	7.71117	7.82886
MB-3436	Negative	Positive	1	Luminal B	1	non-HER2A	Positive	1	0.538229	9.91857	10.218	8.66211	8.24543
MB-3439	Positive	Positive	1	Luminal A	8	non-HER2A		2	1.0599	10.2928	10.1704	7.4675	8.16766
MB-3450	Positive	Positive	1	Luminal A	8	non-HER2A		2	1.1291	10.9061	12.2932	7.70976	8.72757
MB-3467	Negative	Negative	NA	HER2E	5	HER2A	Negative	9	2.45853	14.5997	7.04645	6.83747	7.37884
MB-3490	Positive	Positive	1	Luminal B	3	non-HER2A		2	1.05393	10.8864	10.5212	7.76592	8.2214
MB-3510	Positive	Positive	1	Luminal A	7	non-HER2A		2	1.05449	10.8039	12.2932	7.73111	8.22674
MB-3530	Positive	Positive	1	HER2E	8	non-HER2A		2	1.09382	10.724	10.3407	7.81183	7.90791
MB-3547	Positive	Positive	NA	Luminal A	NA	non-HER2A		2	1.07699	10.582	11.7067	8.38293	8.01829
MB-3548	Positive	Positive	1	Luminal A	3	non-HER2A		2	1.09354	10.7497	12.0001	7.85758	8.53921
MB-3556	Negative	Negative	3	HER2E	1	HER2A	Positive	13	6.03513	13.5803	7.54817	6.82704	7.79742
MB-3567	Negative	Negative	1	Basal-like	1	non-HER2A	Negative	3	0.974088	9.3521	7.15798	6.76672	7.12041
MB-3748	Positive	Positive	1	Luminal A	4+	non-HER2A		2	1.05449	9.77954	11.0339	7.14612	8.00375
MB-3754	Positive	Negative	1	Luminal B	1	non-HER2A		1	0.555591	9.50668	10.6398	6.90182	7.50159
MB-3781	Positive	Positive	1	Luminal A	8	non-HER2A		2	1.00428	9.88621	11.0398	9.90605	7.7172
MB-3797	Positive	Positive	NA	Luminal A	8	non-HER2A		2	1.09382	10.6164	11.8164	8.51055	8.73496
MB-3823	Positive	Positive	1	Luminal A	NA	non-HER2A		3	1.01141	10.0343	9.41536	7.84189	7.75991
MB-3824	Positive	Positive	1	Luminal B	2	non-HER2A		2	1.05449	10.5415	10.9559	7.18403	8.05158
MB-3838	Positive	Positive	1	Luminal B	8	non-HER2A		2	1.02047	10.3629	11.5993	9.22206	7.47469
MB-3840	Positive	Negative	1	Luminal B	6	non-HER2A		2	1.07699	9.7348	10.7807	6.75953	7.32304
MB-3842	Positive	Negative	1	Luminal B	1	non-HER2A		3	0.842751	9.11903	10.1796	6.7879	8.47446
MB-3852	Positive	Positive	1	Luminal A	4+	HER2A		9	2.45853	12.7101	9.68463	9.09594	8.5277
MB-3865	Positive	Negative	1	Luminal A	3	non-HER2A		2	1.05393	10.343	9.31828	6.91298	8.09467
MB-3871	Positive	Positive	NA	Luminal A	8	non-HER2A		2	0.736373	9.98396	11.7258	7.6077	8.76818
MB-3874	Positive	Positive	1	Luminal A	7	non-HER2A		4	1.09268	10.8881	9.40615	7.2639	7.8775
MB-4000	Positive	Negative	NA	Luminal A	4+	non-HER2A		2	1.07646	8.88481	11.0109	6.87454	7.88747
MB-4001	Positive	Negative	NA	Luminal A	7	non-HER2A		2	1.00453	12.3126	11.5104	6.73408	9.03966
MB-4004	Positive	Positive	1	Luminal B	9	non-HER2A		2	1.05449	11.0418	12.6674	7.16941	8.87892
MB-4005	Positive	Positive	NA	Luminal B	3	non-HER2A		2	1.02047	10.1633	10.7646	7.09605	8.82129
MB-4008	Positive	Positive	1	Luminal B	2	non-HER2A		3	1.64073	9.88951	9.72385	7.53427	7.12518
MB-4011	Positive	Negative	NA	Luminal A	8	non-HER2A		5	1.71244	11.6194	10.5707	6.74682	8.88365
MB-4012	Negative	Negative	NA	HER2E	8	non-HER2A	Positive	2	1.07646	13.0173	7.42101	6.83287	10.2982
MB-4015	Negative	Negative	1	HER2E	4-	non-HER2A	Positive	1	0.464241	10.3759	6.95956	6.76665	6.98968
MB-4018	Positive	Positive	NA	Luminal A	7	non-HER2A		4	1.23465	9.71586	11.0997	6.99469	9.08499
MB-4033	Positive	Positive	1	Luminal A	4+	non-HER2A		2	1.05393	9.68463	10.7255	7.48581	8.76583
MB-4046	Positive	Positive	NA	HER2E	8	non-HER2A		2	1.07646	11.6821	9.53354	7.36126	8.77366
MB-4079	Positive	Positive	NA	HER2E	7	non-HER2A		3	1.37096	12.4164	9.95594	8.04789	8.03016
MB-4091	Positive	Positive	NA	Luminal A	4+	non-HER2A		2	1.05393	11.2722	11.45	7.45828	8.27766
MB-4098	Positive	Negative	NA	HER2E	7	non-HER2A		2	1.0599	11.4893	10.7352	6.8831	7.63084
MB-4119	Positive	Negative	NA	HER2E	7	non-HER2A		2	0.989074	12.0708	11.3117	6.80357	8.40134
MB-4120	Positive	Positive	NA	Luminal A	8	non-HER2A		2	1.0372	11.394	12.3417	8.13929	8.89514
MB-4126	Positive	Positive	NA	HER2E	7	non-HER2A		3	1.15392	11.0875	8.29917	7.14768	8.18565
MB-4127	Negative	Negative	NA	HER2E	5	HER2A	Positive	9	2.8766	14.7854	7.28571	6.76056	9.08316
MB-4139	Positive	Positive	NA	Luminal B	8	non-HER2A		3	1.15392	11.4603	12.083	7.29204	9.27122
MB-4140	Positive	Negative	NA	Luminal A	8	non-HER2A		2	1.0599	11.6107	11.8164	6.76372	9.36819
MB-4145	Positive	Positive	NA	HER2E	4+	non-HER2A		3	0.896642	9.69587	10.5877	8.06871	10.0352
MB-4146	Negative	Negative	NA	Basal-like	4-	non-HER2A	Negative	2	1.03693	9.35428	7.15218	6.67947	6.81549
MB-4148	Positive	Positive	NA	Luminal B	9	non-HER2A		3	1.39307	11.1878	10.9116	7.25599	10.0829
MB-4171	Positive	Negative	NA	HER2E	9	non-HER2A		2	1.0372	11.2142	9.99549	6.77698	8.68918
MB-4173	Positive	Positive	NA	Luminal A	7	non-HER2A		2	1.07699	11.4475	12.0667	7.11415	8.90869
MB-4213	Positive	Negative	1	Luminal B	4+	non-HER2A		2	1.11118	9.54109	11.362	6.9069	8.74603
MB-4222	Positive	Positive	NA	HER2E	8	non-HER2A		3	1.04404	10.9973	9.16376	7.90656	8.86015
MB-4230	Positive	Negative	NA	Luminal A	7	non-HER2A		2	0.696204	10.1888	10.93	6.76692	9.53858
MB-4235	Positive	Negative	NA	Basal-like	10	non-HER2A		2	1.03693	10.0964	8.8228	6.80142	7.75049
MB-4236	Positive	Negative	NA	HER2E	9	non-HER2A		2	1.03693	11.4449	10.9207	6.88628	8.04197
MB-4250	Positive	Negative	NA	Luminal A	3	non-HER2A		1	0.54691	9.9052	11.0997	6.81277	9.06237
MB-4264	Positive	Positive	NA	Luminal A	7	non-HER2A		3	1.61469	11.9	11.7194	7.34615	8.50307
MB-4266	Negative	Negative	NA	Luminal A	6	non-HER2A	Positive	2	1.14822	11.4526	9.96365	6.88452	7.28606
MB-4270	Negative	Positive	NA	HER2E	9	HER2A	Positive	4	2.07441	13.5357	10.582	7.11102	8.59558
MB-4274	Positive	Positive	NA	Luminal B	8	non-HER2A		2	0.75726	10.5012	12.0588	7.20176	9.01438
MB-4276	Positive	Positive	NA	HER2E	5	HER2A		8	2.99378	14.1939	9.71084	7.57023	8.58146
MB-4278	Positive	Positive	NA	HER2E	3	non-HER2A		2	1.0599	11.2586	11.254	7.26591	9.03392
MB-4282	Positive	Positive	1	Luminal A	9	non-HER2A		1	0.453006	10.0124	11.5077	8.71092	9.40846
MB-4283	Positive	Positive	NA	Luminal A	8	non-HER2A		4	1.12367	11.6049	11.7997	7.32242	9.13624
MB-4289	Positive	Negative	NA	HER2E	2	non-HER2A		4	1.66589	12.6317	9.86576	6.82935	8.7332
MB-4292	Positive	Positive	NA	Luminal A	8	non-HER2A		2	0.906491	11.399	11.2653	6.82574	8.0219
MB-4298	Positive	Negative	NA	Luminal B	NA	non-HER2A		2	1.11118	11.6254	11.8682	6.82862	8.69643
MB-4300	Positive	Negative	NA	HER2E	6	non-HER2A		2	0.806916	10.8952	9.46599	6.86079	7.32107
MB-4303	Negative	Negative	NA	Basal-like	4-	non-HER2A	Positive	3	0.958868	11.4526	8.13061	6.8096	8.99594
MB-4306	Positive	Positive	NA	Luminal A	3	non-HER2A		3	0.911287	11.234	12.2695	8.42028	9.43346
MB-4310	Positive	Positive	NA	Luminal A	7	non-HER2A		2	1.0372	11.9511	11.3916	7.73545	8.4557
MB-4313	Positive	Positive	NA	Luminal A	4+	non-HER2A		3	1.01141	11.8197	9.92449	7.18591	8.58353
MB-4317	Positive	Positive	NA	HER2E	5	HER2A		10	4.87195	14.4614	11.212	7.04405	7.91955
MB-4318	Positive	Positive	NA	Luminal B	1	non-HER2A		2	1.09382	10.5806	10.7662	7.01657	8.82432
MB-4322	Positive	Negative	NA	Luminal A	7	non-HER2A		2	0.597917	10.9973	12.432	6.85678	9.33506
MB-4323	Positive	Positive	NA	Luminal A	8	non-HER2A		4	1.23465	11.8097	11.2429	7.66832	8.61593
MB-4324	Positive	Positive	NA	HER2E	6	non-HER2A		4	1.23465	11.6761	10.982	7.48916	8.45969
MB-4328	Positive	Positive	NA	Luminal A	7	non-HER2A		2	1.00453	10.6048	12.083	9.00834	8.886
MB-4329	Positive	Positive	NA	Luminal A	7	non-HER2A		2	1.05449	11.1202	11.9924	7.66848	9.04805
MB-4331	Positive	Negative	NA	HER2E	1	HER2A		4	2.29644	12.2106	11.1182	6.75683	7.04968
MB-4333	Positive	Negative	NA	Luminal A	3	non-HER2A		2	1.05393	11.3766	12.1245	6.82436	9.5449
MB-4339	Positive	Positive	NA	Luminal B	8	non-HER2A		4	1.14179	11.0654	11.3916	7.60755	8.70369
MB-4341	Negative	Negative	NA	HER2E	5	non-HER2A	Positive	3	1.39272	14.6216	7.06592	6.70606	9.56919
MB-4342	Positive	Negative	1	Luminal A	4+	non-HER2A		2	1.05393	10.1217	11.1182	6.82129	8.04595
MB-4348	Positive	Negative	NA	HER2E	5	HER2A		10	3.13722	14.5783	9.84977	6.7691	7.90114
MB-4353	Positive	Positive	NA	Luminal B	8	non-HER2A		2	1.09382	10.8776	10.9858	7.90579	8.75064
MB-4360	Negative	Negative	NA	HER2E	5	HER2A	Positive	9	3.03346	14.5997	6.87198	6.86797	7.70968
MB-4368	Positive	Positive	NA	Luminal A	8	non-HER2A		2	1.0372	11.6049	11.505	7.3191	9.03437
MB-4374	Positive	Positive	NA	Luminal A	7	non-HER2A		2	1.05393	11.6372	12.193	7.86095	8.58097
MB-4395	Positive	Positive	NA	HER2E	1	non-HER2A		4	1.19552	11.4267	10.0461	7.52382	9.40209
MB-4408	Negative	Negative	NA	Basal-like	9	non-HER2A	Negative	2	0.97439	9.66081	6.91037	6.77999	6.89729
MB-4417	Negative	Negative	NA	Basal-like	10	non-HER2A	Negative	3	1.11786	10.0305	7.15424	6.78277	6.78836
MB-4418	Positive	Positive	NA	Luminal A	8	non-HER2A		2	1.11118	11.6851	10.7177	7.68918	9.54173
MB-4426	Positive	Positive	NA	Basal-like	7	non-HER2A		4	1.23465	11.5935	9.23317	7.61429	8.97354
MB-4442	Positive	Positive	NA	Luminal A	8	non-HER2A		2	0.958674	11.7067	10.3782	7.67418	8.54195
MB-4548	Negative	Negative	NA	HER2E	4-	HER2A	Positive	4	2.00855	13.6446	6.89455	6.77792	6.85967
MB-4557	Positive	Positive	NA	Luminal A	8	non-HER2A		2	1.03693	11.9288	10.1002	8.69398	8.47194
MB-4564	Positive	Positive	1	Luminal A	7	non-HER2A		2	1.05393	10.7791	11.7606	9.12928	9.06621
MB-4591	Positive	Positive	1	Luminal B	9	non-HER2A		2	1.07699	11.0775	12.6078	7.08422	8.97894
MB-4593	Positive	Positive	1	Luminal A	8	non-HER2A		3	1.53071	12.1587	10.7563	7.43274	8.10626
MB-4598	Positive	Positive	1	Luminal B	8	non-HER2A		2	1.0372	11.5708	11.5652	7.49482	8.32099
MB-4599	Positive	Positive	1	Luminal A	8	non-HER2A		2	1.05449	11.6943	11.9	7.36226	9.30166
MB-4602	Positive	Positive	1	Luminal B	1	non-HER2A		4	1.29878	10.969	10.93	7.30831	8.85634
MB-4616	Positive	Positive	1	Luminal A	8	non-HER2A		2	0.877249	11.1038	12.4114	7.9024	9.59072
MB-4621	Negative	Negative	1	Basal-like	10	non-HER2A	Negative	2	0.75726	8.3257	7.01907	6.82044	7.25739
MB-4627	Positive	Positive	1	Luminal A	3	non-HER2A		2	1.11118	10.9207	11.6401	7.14796	8.6309
MB-4630	Positive	Positive	NA	Luminal B	8	non-HER2A		3	1.6941	11.9288	12.2375	6.96632	8.74208
MB-4633	Positive	Positive	1	Luminal A	4+	non-HER2A		3	0.974088	10.7068	12.1501	7.09674	8.66678
MB-4634	Positive	Positive	1	Luminal A	3	non-HER2A		2	0.877249	10.8307	11.7511	7.63901	9.27485
MB-4639	Positive	Positive	1	Luminal B	9	non-HER2A		4	1.14179	11.0855	10.8724	7.75049	7.9392
MB-4640	Negative	Negative	1	HER2E	7	non-HER2A	Positive	5	1.95473	12.2329	7.50644	6.74587	8.20305
MB-4642	Positive	Positive	1	Luminal B	6	non-HER2A		2	1.11118	10.5483	10.8672	7.05627	7.20104
MB-4644	Positive	Negative	3	Luminal B	5	HER2A		9	2.73386	13.9642	11.4628	6.76561	8.98866
MB-4648	Positive	Positive	NA	Luminal B	1	non-HER2A		3	1.46158	11.3141	11.5878	7.87865	9.05298
MB-4649	Positive	Negative	1	Luminal B	3	non-HER2A		2	0.649392	10.6561	11.813	6.82768	9.51971
MB-4651	Positive	Negative	1	Luminal B	6	non-HER2A		1	0.362342	8.90748	11.1223	6.80739	8.3344
MB-4654	Positive	Positive	1	Luminal B	8	non-HER2A		2	1.21959	10.8291	11.5077	7.47923	9.07407
MB-4655	Positive	Positive	1	Luminal A	3	non-HER2A		2	1.02047	11.362	11.505	6.98275	8.18912
MB-4661	Positive	Positive	1	Luminal A	7	non-HER2A		2	1.09354	10.9541	11.4893	7.49959	8.69229
MB-4663	Negative	Negative	3	Basal-like	10	HER2A	Positive	12	4.99768	14.0258	7.15503	6.86299	8.36908
MB-4665	Positive	Positive	1	Luminal A	4+	non-HER2A		2	1.1294	11.0976	11.0223	7.54866	8.8194
MB-4666	Positive	Negative	1	Luminal A	7	non-HER2A		1	0.538229	10.3384	11.0976	6.77723	9.19909
MB-4667	Negative	Negative	1	HER2E	4-	non-HER2A	Positive	2	1.0599	10.855	7.44624	6.94397	7.99055
MB-4669	Positive	Negative	1	Luminal B	6	non-HER2A		1	0.403357	10.3916	11.9846	6.82196	8.67049
MB-4670	Positive	Positive	NA	Luminal A	7	non-HER2A		2	1.07646	11.6608	12.0547	6.92329	9.15674
MB-4671	Positive	Positive	1	Luminal B	2	non-HER2A		2	1.07646	11.4449	12.3077	7.4042	8.84603
MB-4672	Positive	Positive	1	Luminal A	7	non-HER2A		5	1.47068	10.9522	11.9924	7.61661	9.35869
MB-4673	Positive	Negative	1	Luminal B	9	non-HER2A		3	1.5554	11.6313	10.628	6.89268	7.71449
MB-4674	Positive	Positive	1	Luminal A	7	non-HER2A		2	1.05449	11.0301	11.8682	7.72501	8.46967
MB-4679	Negative	Negative	1	Basal-like	10	non-HER2A	Negative	2	0.832946	9.81491	7.40587	6.76048	7.81912
MB-4681	Positive	Negative	1	Luminal A	3	non-HER2A		2	1.07699	10.8393	11.0301	6.86845	8.54748
MB-4686	Positive	Negative	1	Luminal A	3	non-HER2A		2	1.0372	10.3372	10.3951	6.9087	8.14117
MB-4687	Positive	Negative	NA	Luminal A	NA	non-HER2A		3	1.02746	10.1806	10.1031	6.8057	8.65539
MB-4688	Positive	Positive	3	Luminal B	5	HER2A		9	4.6662	14.4793	11.0398	7.232	7.85499
MB-4691	Positive	Negative	1	Luminal A	7	non-HER2A		3	1.01141	11.7638	10.4087	6.8481	8.77697
MB-4692	Positive	Positive	1	Luminal A	8	non-HER2A		2	1.0372	11.4346	11.5291	8.02529	9.23671
MB-4694	Positive	Negative	1	Basal-like	10	non-HER2A		2	0.891398	9.16448	8.67321	6.80241	7.09256
MB-4696	Negative	Negative	1	Basal-like	10	non-HER2A	Negative	2	0.588273	10.2552	7.04766	6.79446	7.94475
MB-4701	Positive	Positive	1	Luminal A	8	non-HER2A		2	1.02047	11.1161	10.6179	8.86555	8.26511
MB-4704	Positive	Negative	1	Luminal A	4+	non-HER2A		3	1.5558	12.1203	10.1031	6.82498	8.90709
MB-4705	Positive	Positive	1	Luminal A	3	non-HER2A		2	1.03693	10.8723	11.2296	7.18573	8.39163
MB-4706	Positive	Positive	1	Luminal A	3	non-HER2A		2	1.11118	10.8881	10.9098	7.02002	9.27587
MB-4708	Positive	Negative	1	Luminal A	3	non-HER2A		3	1.27057	11.2275	11.3189	6.78013	8.64145
MB-4709	Positive	Positive	1	Luminal A	8	non-HER2A		2	1.05393	11.1943	11.005	7.83802	9.89447
MB-4711	Negative	Negative	3	Basal-like	5	non-HER2A	Positive	3	1.5809	13.1839	7.21981	6.79492	7.7442
MB-4719	Positive	Positive	1	Luminal A	8	non-HER2A		2	1.03693	11.0795	11.8507	9.63951	8.70782
MB-4721	Positive	Negative	1	Luminal A	8	non-HER2A		2	1.05449	11.7194	10.7224	6.69362	9.51723
MB-4722	NA	Positive	1	Luminal A	8	non-HER2A		2	1.03693	11.177	11.9362	8.31106	8.67691
MB-4723	Positive	Negative	1	Luminal B	1	non-HER2A		3	1.61469	12.5011	12.3126	6.84316	8.56215
MB-4724	Negative	Negative	3	HER2E	4-	HER2A	Positive	5	2.51069	13.9443	7.07052	6.82745	9.14761
MB-4725	Positive	Positive	3	HER2E	5	HER2A		5	2.55118	13.9642	11.0517	7.01129	8.06149
MB-4730	Positive	Positive	1	Luminal A	8	non-HER2A		3	0.868403	10.9596	10.7547	7.42542	8.82926
MB-4732	Negative	Negative	1	Basal-like	10	non-HER2A	Negative	3	0.856343	9.03922	7.71878	6.73659	7.30781
MB-4733	Negative	Negative	1	Basal-like	4-	non-HER2A	Positive	2	1.05393	10.7068	7.14551	6.82325	7.27028
MB-4735	Positive	Positive	1	Luminal A	8	non-HER2A		3	1.50679	10.9392	11.4242	7.18462	8.26511
MB-4741	Positive	Negative	1	Luminal B	8	non-HER2A		2	1.11118	10.4733	10.2695	6.94661	8.73639
MB-4742	Positive	Positive	1	Luminal A	8	non-HER2A		2	1.03693	10.7465	11.9473	8.50156	8.38565
MB-4744	Positive	Positive	1	Luminal B	8	non-HER2A		4	1.19552	11.2429	11.4116	7.836	8.97772
MB-4745	Negative	Negative	3	HER2E	5	HER2A	Negative	14	6.04479	14.7854	6.74396	6.83074	7.46623
MB-4749	Positive	Positive	1	Luminal A	8	non-HER2A		2	1.02047	11.007	11.7606	7.19146	9.41247
MB-4752	Positive	Negative	1	Luminal A	6	non-HER2A		4	1.29878	10.0324	12.3417	6.86988	8.34364
MB-4762	Positive	Positive	1	Luminal A	7	non-HER2A		2	1.0372	10.6897	11.3668	8.25015	9.22808
MB-4764	Positive	Positive	1	Luminal A	3	non-HER2A		2	1.0372	10.2673	10.1826	7.07992	8.97227
MB-4771	Positive	Positive	NA	Luminal A	8	non-HER2A		2	1.11118	10.528	9.87472	7.74634	9.15577
MB-4778	Positive	Positive	1	Luminal A	4+	non-HER2A		2	1.05449	9.99013	10.3419	7.23849	7.99655
MB-4785	Positive	Positive	1	Luminal A	8	non-HER2A		2	1.03693	11.1813	11.9399	7.93348	8.93459
MB-4787	Positive	Positive	1	Luminal A	6	non-HER2A		5	1.40458	10.615	11.6851	6.99972	8.06849
MB-4792	Negative	Negative	1	Basal-like	10	non-HER2A	Negative	3	1.5558	10.1236	6.8857	6.8015	6.96338
MB-4793	Negative	Negative	1	Basal-like	10	non-HER2A	Negative	2	0.794502	10.6989	6.96312	6.80697	7.74694
MB-4794	Positive	Positive	1	Luminal A	7	non-HER2A		2	1.09382	10.441	11.6078	7.30579	8.751
MB-4797	Positive	Negative	1	Luminal A	2	non-HER2A		3	1.61549	11.3117	12.4013	6.82495	8.60842
MB-4800	Positive	Positive	1	Luminal A	6	non-HER2A		4	1.51452	11.2519	11.4866	7.06022	7.98211
MB-4801	Positive	Positive	1	Luminal A	8	non-HER2A		3	1.02746	10.4398	11.9252	8.42084	8.67423
MB-4802	NA	Negative	1	Luminal B	8	non-HER2A		2	1.14761	11.1326	12.1078	6.80199	9.99105
MB-4805	Positive	Positive	1	Luminal A	7	non-HER2A		4	1.39241	10.6309	10.5707	7.44308	8.59366
MB-4806	Positive	Positive	1	Luminal A	3	non-HER2A		2	1.09354	10.4322	11.0262	8.33941	8.28788
MB-4818	Positive	Negative	1	Luminal B	3	non-HER2A		2	1.07699	10.3396	12.1629	6.78299	9.02171
MB-4823	Positive	Negative	1	HER2E	NA	HER2A		12	4.61568	13.3948	7.11146	6.73441	8.73143
MB-4825	Positive	Positive	1	Luminal A	8	non-HER2A		3	1.2699	10.4577	12.5339	7.7916	8.56495
MB-4827	Positive	Negative	NA	Luminal A	3	non-HER2A		2	1.02047	11.2097	12.4958	6.81313	7.77005
MB-4828	Positive	Negative	1	Luminal B	1	non-HER2A		2	1.14822	10.8881	11.7384	6.84054	9.10144
MB-4829	Positive	Negative	1	Luminal B	7	non-HER2A		2	1.09354	10.4825	11.2318	6.84666	9.11302
MB-4832	Positive	Positive	NA	Luminal A	3	non-HER2A		2	1.03693	11.0956	9.67403	7.64621	8.85977
MB-4836	Positive	Positive	1	HER2E	4+	non-HER2A		3	1.02746	11.7004	11.0537	6.93625	8.46401
MB-4839	NA	Positive	1	Luminal B	3	non-HER2A		3	0.925985	8.79042	11.9216	7.26916	9.03262
MB-4843	Positive	Positive	1	Luminal A	8	non-HER2A		2	0.906011	10.2106	8.84603	8.17047	8.94887
MB-4845	Positive	Positive	1	Luminal A	8	non-HER2A		2	1.07646	10.6637	12.2152	8.36283	8.5217
MB-4846	Positive	Positive	3	Luminal B	5	HER2A		8	2.94549	13.2907	10.8724	7.47791	9.36259
MB-4849	Positive	Negative	NA	Luminal A	8	non-HER2A		4	1.44937	11.414	11.9144	6.82654	8.68134
MB-4851	Positive	Positive	1	Luminal A	2	non-HER2A		2	1.02047	10.7662	11.9962	7.17548	8.36581
MB-4853	Positive	Positive	1	Luminal A	8	non-HER2A		4	1.07534	11.3002	11.2318	7.66895	8.30717
MB-4865	Negative	Negative	1	Basal-like	10	non-HER2A	Negative	3	0.829374	8.32099	6.98462	6.77285	7.11406
MB-4866	Positive	Positive	3	Luminal A	4+	HER2A		5	2.87055	12.6257	8.91596	7.42311	9.13251
MB-4867	Positive	Positive	1	Luminal A	3	non-HER2A		4	1.31973	10.8039	10.6193	8.36418	8.63685
MB-4869	Positive	Positive	1	Luminal A	8	non-HER2A		2	1.03693	10.6019	11.3815	8.21028	9.14664
MB-4870	Positive	Positive	1	Luminal A	3	non-HER2A		2	1.03693	9.43346	11.5595	8.45371	8.31185
MB-4872	Positive	Positive	1	Luminal A	3	non-HER2A		2	0.696204	9.24695	10.1168	7.43628	8.2828
MB-4873	Positive	Positive	1	Luminal B	8	non-HER2A		2	1.11118	10.7177	10.2695	7.39631	8.60203
MB-4876	Positive	Negative	1	Basal-like	4+	non-HER2A		2	1.03693	9.64153	9.97776	6.85894	7.35778
MB-4878	Positive	Negative	3	Luminal A	5	HER2A		13	5.24496	13.2742	11.177	6.95136	8.15691
MB-4882	NA	Positive	NA	Luminal A	3	non-HER2A		2	1.03693	10.6135	10.5933	7.63823	9.18587
MB-4886	Negative	Negative	NA	HER2E	5	HER2A	Positive	10	2.76528	14.722	7.19154	6.87814	8.52469
MB-4888	Negative	Negative	1	Basal-like	4-	non-HER2A	Negative	3	1.53071	9.67264	7.07798	6.85042	7.00035
MB-4893	Negative	Negative	1	Basal-like	10	non-HER2A	Negative	2	1.03693	9.00405	7.36784	6.85396	7.03311
MB-4896	Negative	Negative	3	Basal-like	5	HER2A	Positive	5	2.59233	14.0153	7.40709	6.82136	8.31395
MB-4899	Positive	Positive	1	Luminal A	3	non-HER2A		2	1.0372	10.814	10.4322	8.14162	8.14508
MB-4904	Negative	Negative	3	HER2E	5	HER2A	Positive	4	2.04095	12.3465	7.27552	6.82352	8.70541
MB-4908	Positive	Positive	3	Luminal B	5	HER2A		10	3.90844	13.7081	11.9288	7.31112	7.92368
MB-4912	Positive	Positive	1	Luminal B	8	non-HER2A		2	1.0599	10.1643	11.4449	8.3455	8.47506
MB-4925	Positive	Positive	1	Luminal B	7	non-HER2A		4	1.07534	10.063	11.1079	7.28797	8.16461
MB-4931	Negative	Negative	NA	Basal-like	10	non-HER2A	Negative	3	0.856343	9.00834	6.89221	6.81828	6.86691
MB-4934	Positive	Positive	1	Luminal B	7	non-HER2A		2	1.11118	10.0507	11.1346	7.71869	8.82888
MB-4938	Negative	Negative	NA	Basal-like	10	non-HER2A	Negative	2	1.03693	9.53418	7.00384	6.87297	7.03309
MB-4944	Positive	Positive	1	Luminal B	2	non-HER2A		2	1.0372	10.5132	11.8931	7.44221	8.39858
MB-4945	Negative	Negative	1	Basal-like	9	non-HER2A	Negative	2	0.958923	10.819	7.29865	6.76706	7.26591
MB-4949	Positive	Negative	1	Luminal B	1	non-HER2A		2	0.806713	10.1344	11.6254	6.93004	8.0805
MB-4952	Negative	Negative	3	HER2E	4-	non-HER2A	Positive	2	1.05393	14.4614	7.23461	6.81641	8.15947
MB-4961	Positive	Positive	1	Luminal A	8	non-HER2A		2	1.09354	10.2221	11.3595	8.95467	9.21206
MB-4962	Positive	Positive	1	Luminal A	8	non-HER2A		3	0.868403	10.4087	12.0001	7.76746	8.69575
MB-4965	Positive	Positive	1	Luminal A	4+	non-HER2A		2	1.05393	9.94141	12.0667	7.51199	8.56838
MB-4966	Positive	Positive	1	Luminal B	3	non-HER2A		2	1.07646	10.196	9.41078	7.38242	8.5562
MB-4967	Positive	Positive	NA	Luminal A	3	non-HER2A		2	1.02047	10.4198	10.3927	8.31447	8.21487
MB-4968	Positive	Positive	1	Luminal A	4+	non-HER2A		2	1.11118	10.7036	11.9511	7.65086	8.76892
MB-4969	Positive	Positive	1	Luminal A	7	non-HER2A		3	1.31587	10.3582	11.8401	8.32177	9.2031
MB-4976	Positive	Positive	1	Luminal A	8	non-HER2A		2	0.974905	10.7193	11.2608	7.53926	8.35251
MB-4977	Positive	Positive	1	Luminal A	8	non-HER2A		3	1.50679	11.2837	10.9392	7.5784	8.12283
MB-4981	Positive	Positive	1	Luminal A	3	non-HER2A		2	1.05393	10.7662	9.50484	7.04779	8.02614
MB-4982	Positive	Negative	1	HER2E	4-	non-HER2A		2	0.724684	9.94308	7.66475	6.79592	7.14185
MB-4987	Negative	Negative	NA	Luminal A	8	non-HER2A	Positive	2	1.05393	10.8952	10.897	6.94517	8.23954
MB-4992	Negative	Negative	1	Luminal A	3	non-HER2A	Positive	3	1.50641	11.5993	7.65583	6.81817	7.90694
MB-4993	Negative	Negative	1	HER2E	4-	non-HER2A	Positive	1	0.555591	10.037	7.22502	6.80451	8.57847
MB-4994	Positive	Positive	1	Luminal B	8	non-HER2A		2	0.989074	10.862	12.112	7.47303	8.77512
MB-4996	Positive	Positive	1	Luminal A	7	non-HER2A		2	1.05393	10.8515	12.2695	7.3994	9.65459
MB-4999	Positive	Positive	1	Luminal A	7	non-HER2A		2	1.09382	11.1792	9.89447	7.21833	8.24027
MB-5001	Positive	Negative	1	Luminal A	4+	non-HER2A		2	1.07699	10.5623	11.5104	6.82269	8.08205
MB-5004	Negative	Negative	1	HER2E	4+	non-HER2A	Positive	2	1.09354	11.2837	8.71506	6.85532	7.8676
MB-5011	Positive	Positive	1	Luminal A	3	non-HER2A		2	1.03693	10.8758	10.3073	8.85634	8.93744
MB-5013	Positive	Positive	1	Luminal A	3	non-HER2A		2	1.07646	11.1792	12.0547	8.04035	8.46777
MB-5017	Positive	Negative	NA	HER2E	4+	non-HER2A		2	1.0372	10.1714	9.09547	6.84607	8.85671
MB-5018	Positive	Positive	1	Luminal A	8	non-HER2A		4	1.27849	10.4436	11.8753	8.79964	9.10559
MB-5020	Positive	Positive	1	Luminal A	8	non-HER2A		2	1.02047	10.7272	11.5766	7.4068	8.86439
MB-5022	Positive	Negative	3	HER2E	NA	HER2A		9	2.9694	14.2728	8.21631	6.82351	9.70437
MB-5027	Positive	Positive	1	Luminal A	3	non-HER2A		2	1.0372	10.9802	9.31023	7.68157	8.12832
MB-5033	Positive	Negative	1	Luminal B	1	non-HER2A		2	1.11118	10.5862	11.6638	6.76649	8.22945
MB-5035	Positive	Positive	1	Luminal A	3	non-HER2A		2	1.05393	10.528	10.8917	7.41036	9.1339
MB-5045	Positive	Positive	1	Luminal A	4+	non-HER2A		5	1.34417	11.0895	10.2849	7.04641	8.33836
MB-5048	Positive	Positive	1	Luminal A	7	non-HER2A		2	1.1633	10.724	11.0204	7.17685	8.31096
MB-5050	Positive	Positive	1	Luminal A	3	non-HER2A		3	1.06115	10.5595	11.5624	7.9951	8.68474
MB-5052	Positive	Negative	3	HER2E	4-	non-HER2A		3	1.5558	12.035	7.40563	6.86564	8.31134
MB-5053	Positive	Positive	1	Luminal A	3	non-HER2A		2	1.03693	11.0262	11.7606	7.5577	8.47153
MB-5054	Negative	Negative	3	Basal-like	5	HER2A	Positive	4	2.04095	13.3858	7.37502	6.78759	8.25564
MB-5057	Negative	Negative	1	Basal-like	10	non-HER2A	Negative	3	1.19175	10.1119	7.00453	6.83849	6.9187
MB-5059	Positive	Positive	NA	Luminal A	8	non-HER2A		2	0.974905	10.5483	10.1939	8.86324	8.26334
MB-5061	Positive	Positive	NA	Luminal B	7	non-HER2A		3	1.5554	10.7678	11.1535	8.01598	7.97943
MB-5062	Positive	Negative	3	Luminal B	1	HER2A		9	2.92226	13.7543	11.3165	6.84506	7.23389
MB-5063	Negative	Negative	3	HER2E	5	HER2A	Positive	5	3.00134	14.6688	7.81524	6.78543	7.97636
MB-5064	Positive	Positive	1	Luminal A	4+	non-HER2A		2	1.05449	8.48471	11.5708	8.22164	8.48206
MB-5065	Negative	Negative	1	Basal-like	4-	non-HER2A	Negative	2	0.863325	10.0592	7.13317	6.79135	7.0259
MB-5068	Positive	Positive	1	Luminal A	4+	non-HER2A		2	1.05393	10.3903	11.7932	7.94594	8.5637
MB-5072	Negative	Negative	1	HER2E	4-	non-HER2A	Positive	1	0.574111	9.85534	7.33666	6.80579	8.99636
MB-5073	Positive	Positive	1	Luminal A	4+	non-HER2A		3	1.01141	10.0269	12.3077	7.17643	8.70197
MB-5074	Positive	Negative	1	Luminal A	3	non-HER2A		2	1.14822	11.803	11.5024	6.95682	8.83156
MB-5084	Positive	Negative	NA	Luminal A	8	non-HER2A		4	1.39205	11.2953	10.5307	6.81353	8.24891
MB-5086	Positive	Positive	1	Luminal A	8	non-HER2A		2	1.02047	11.3094	12.7101	8.8052	8.98022
MB-5088	Positive	Negative	1	Luminal A	8	non-HER2A		2	1.05393	11.1326	12.0466	6.95321	8.6902
MB-5093	Positive	Negative	1	HER2E	NA	non-HER2A		3	1.29499	11.3451	10.5609	6.82553	8.85367
MB-5098	Positive	Positive	1	Luminal A	9	non-HER2A		2	1.07646	11.1899	11.5935	7.10574	8.07045
MB-5100	Negative	Negative	NA	Basal-like	10	non-HER2A	Negative	2	1.05393	8.88799	7.18068	6.83797	7.07877
MB-5104	Positive	Negative	1	Luminal A	NA	non-HER2A		2	1.03693	11.0498	12.0233	6.81857	8.75082
MB-5105	Positive	Positive	1	Luminal A	8	non-HER2A		3	0.911517	10.35	11.2676	7.62298	9.34542
MB-5106	Positive	Negative	1	Luminal A	NA	non-HER2A		2	1.0599	10.9765	11.7258	6.92354	8.09311
MB-5109	Positive	Negative	1	Luminal A	NA	non-HER2A		2	1.00453	11.6165	7.20237	6.94493	8.96348
MB-5114	Positive	Negative	NA	Basal-like	5	HER2A		5	2.55118	14.4975	7.31075	6.92163	8.19273
MB-5116	Positive	Positive	NA	Luminal B	2	non-HER2A		3	1.5809	10.7497	12.4796	7.74158	8.2534
MB-5117	Positive	Positive	1	Luminal A	NA	non-HER2A		3	1.41518	11.0378	10.9503	8.26012	7.9083
MB-5118	Positive	Positive	1	Luminal A	3	non-HER2A		2	0.958674	10.5792	11.568	7.07526	8.60331
MB-5119	Positive	Negative	1	Luminal A	7	non-HER2A		2	0.649392	10.2541	11.0418	6.74622	8.21801
MB-5121	Positive	Positive	1	Luminal B	8	non-HER2A		2	1.02047	10.3916	11.7833	7.15547	9.01912
MB-5122	Positive	Positive	1	Luminal A	8	non-HER2A		4	1.15816	10.5567	11.8612	7.55607	8.19284
MB-5123	Positive	Negative	1	Luminal A	7	non-HER2A		2	1.05449	10.3806	10.1603	6.78335	7.60547
MB-5126	Negative	Negative	NA	Basal-like	10	non-HER2A	Negative	1	0.555591	8.72376	6.97928	6.79279	6.89262
MB-5130	Positive	Positive	1	Luminal A	7	non-HER2A		3	0.842751	9.45758	12.079	7.06519	8.83194
MB-5131	Positive	Positive	1	Luminal A	NA	non-HER2A		2	1.05393	11.2142	9.64432	7.50851	8.61004
MB-5138	Negative	Negative	1	Basal-like	10	non-HER2A	Negative	1	0.457214	9.65805	7.50185	6.75822	7.03865
MB-5139	Positive	Negative	1	Luminal B	1	non-HER2A		1	0.518466	9.6013	11.8861	6.87415	8.86946
MB-5140	Positive	Positive	1	Luminal B	NA	non-HER2A		3	0.94092	10.7177	11.3891	7.56661	8.58575
MB-5143	Positive	Positive	1	Luminal A	4+	non-HER2A		3	0.911517	10.9615	11.4397	8.74531	8.75738
MB-5148	Positive	Negative	1	HER2E	4-	non-HER2A		2	1.00428	11.3546	7.33966	6.78189	7.91742
MB-5152	Positive	Positive	1	Luminal A	7	non-HER2A		2	1.11118	10.9802	11.6136	7.00634	8.85596
MB-5158	Positive	Positive	1	Luminal A	NA	non-HER2A		2	1.05393	11.1599	10.4216	8.53741	8.57248
MB-5160	Positive	Positive	1	Luminal B	8	non-HER2A		2	1.05449	10.4284	11.6313	7.54356	8.90286
MB-5162	NA	Negative	NA	Basal-like	4-	non-HER2A		2	1.03693	8.63418	7.12679	6.81545	7.33634
MB-5163	Positive	Negative	1	Luminal A	3	non-HER2A		3	1.48361	10.8793	11.0204	6.83726	8.24444
MB-5167	Positive	Positive	1	Luminal B	8	non-HER2A		2	1.07646	11.2097	12.0389	7.08092	8.83538
MB-5172	Negative	Negative	NA	HER2E	5	HER2A	Positive	12	3.96023	14.4438	7.62222	6.99245	8.84372
MB-5175	Positive	Positive	NA	Basal-like	4+	non-HER2A		2	1.03693	9.40325	9.38671	7.24454	7.93211
MB-5176	Positive	Negative	NA	Luminal A	4+	non-HER2A		2	1.23926	10.7021	10.9896	6.83195	7.86544
MB-5182	Positive	Positive	1	Luminal A	3	non-HER2A		2	1.11118	11.4945	10.8881	8.16695	8.74495
MB-5183	Positive	Positive	1	Luminal A	8	non-HER2A		2	0.988584	10.8291	12.1629	8.82813	8.29815
MB-5184	Positive	Positive	1	Luminal A	4+	non-HER2A		2	1.05393	10.6637	10.4998	7.1963	8.30666
MB-5185	Positive	Positive	1	Luminal A	4+	non-HER2A		1	0.538496	9.79712	11.8164	7.64269	8.73515
MB-5188	Positive	Negative	1	Basal-like	10	non-HER2A		0	0	9.38953	8.19653	6.8167	7.54718
MB-5189	Positive	Positive	1	Luminal A	4+	non-HER2A		2	1.20053	10.4385	10.6804	7.86507	8.82206
MB-5190	Negative	Negative	3	Basal-like	4-	HER2A	Positive	4	2.07387	14.2191	7.89634	6.85587	8.40381
MB-5191	Positive	Positive	1	Luminal A	8	non-HER2A		2	1.00453	10.6835	10.8515	7.38061	8.01365
MB-5193	Positive	Positive	1	Luminal A	7	non-HER2A		2	1.07646	11.384	12.2375	7.26553	8.29739
MB-5196	Positive	Negative	1	Luminal A	7	non-HER2A		4	1.17655	11.8861	11.234	6.88032	8.07874
MB-5199	Negative	Negative	3	Basal-like	5	HER2A	Positive	5	2.55118	14.5367	7.86957	6.90656	8.60331
MB-5201	Positive	Positive	1	Luminal A	8	non-HER2A		4	1.15816	10.5293	12.3126	9.39241	9.17705
MB-5205	Negative	Negative	1	Basal-like	9	non-HER2A	Negative	4	1.09268	10.2661	7.98365	6.76943	8.08583
MB-5206	Positive	Negative	1	Luminal A	2	non-HER2A		2	1.0372	9.9077	12.1671	6.73228	8.22237
MB-5209	Negative	Negative	1	Basal-like	4-	non-HER2A	Positive	2	1.02047	10.3384	7.0807	6.8327	6.83986
MB-5212	Positive	Negative	3	Luminal B	5	HER2A		9	2.8766	13.6355	9.4452	6.8268	8.65066
MB-5213	Negative	Negative	3	HER2E	5	HER2A	Positive	10	3.90844	12.7166	7.11309	6.7518	8.5593
MB-5215	Positive	Negative	1	Luminal B	8	non-HER2A		2	1.09382	10.0315	11.3284	6.77626	8.36096
MB-5218	Positive	Negative	NA	Luminal B	1	non-HER2A		1	0.600116	9.73925	9.87719	6.86331	8.35639
MB-5219	Positive	Positive	NA	Luminal A	NA	non-HER2A		2	1.09382	11.2768	12.0272	7.99696	8.86673
MB-5221	Positive	Positive	1	Luminal A	8	non-HER2A		2	0.97439	10.7596	11.6488	7.92447	8.31185
MB-5222	Negative	Negative	3	HER2E	10	non-HER2A	Positive	3	1.61469	12.3173	7.1223	6.82908	7.52586
MB-5223	Negative	Negative	1	Basal-like	4-	non-HER2A	Negative	3	1.10456	9.54869	7.17071	6.70347	7.08383
MB-5224	Positive	Positive	NA	Luminal A	7	non-HER2A		2	1.05393	10.3747	11.3546	8.01894	8.34018
MB-5225	Negative	Negative	1	Basal-like	10	non-HER2A	Negative	2	1.0715	9.92876	7.03051	6.90117	6.93311
MB-5226	Positive	Negative	1	Luminal B	4+	non-HER2A		1	0.573807	10.4359	11.1472	6.82492	7.78487
MB-5227	Positive	Positive	1	Luminal A	4+	non-HER2A		2	1.1294	10.7432	12.0912	8.57595	8.0219
MB-5229	Negative	Negative	NA	Basal-like	5	HER2A	Positive	5	2.51132	14.4102	7.0118	6.78533	8.79742
MB-5231	Negative	Negative	NA	HER2E	5	HER2A	Positive	9	2.60521	14.0048	7.22233	6.76025	7.77214
MB-5232	Negative	Negative	NA	Basal-like	10	non-HER2A	Negative	2	1.09382	9.92961	7.30286	6.7025	7.0908
MB-5233	Positive	Positive	NA	Luminal B	8	non-HER2A		2	0.89163	10.5707	11.803	7.42366	8.53528
MB-5236	Negative	Negative	NA	Basal-like	10	non-HER2A	Negative	3	0.911517	9.14285	7.21052	6.87896	6.85852
MB-5239	NA	Positive	NA	Luminal B	9	non-HER2A		2	1.11118	10.328	11.432	7.68364	8.78751
MB-5240	Positive	Positive	1	Luminal A	7	non-HER2A		4	1.07534	10.5905	10.0305	7.64776	8.51835
MB-5244	Positive	Positive	NA	Luminal B	6	non-HER2A		3	0.958627	10.1694	12.6796	7.21677	7.11616
MB-5251	Positive	Positive	NA	Luminal A	3	non-HER2A		2	1.11118	10.3879	11.6943	8.40717	8.62046
MB-5256	Positive	Positive	NA	Luminal A	8	non-HER2A		2	1.09382	10.8073	11.8896	7.51726	8.91232
MB-5259	Negative	Negative	NA	HER2E	5	HER2A	Positive	11	3.00566	13.9344	7.38095	6.86886	7.88984
MB-5260	Positive	Positive	NA	Luminal B	7	non-HER2A		2	1.11118	10.9263	12.6492	7.0394	8.85252
MB-5261	Positive	Positive	NA	Luminal B	4+	non-HER2A		2	1.1294	10.0007	12.193	7.15568	8.13446
MB-5264	Positive	Positive	NA	Luminal A	8	non-HER2A		2	0.958674	11.0916	10.4905	8.0103	8.79742
MB-5267	Positive	Positive	NA	Luminal A	2	non-HER2A		2	1.03693	9.57631	10.6354	7.70446	8.41942
MB-5268	Positive	Positive	NA	Luminal A	3	non-HER2A		2	1.07699	10.9116	8.99251	7.04441	7.88622
MB-5270	Positive	Positive	NA	Luminal A	8	non-HER2A		3	1.31587	10.9263	12.2106	7.27969	9.04448
MB-5271	Positive	Negative	NA	Luminal B	9	non-HER2A		4	1.589	11.643	11.0089	6.84733	7.75066
MB-5279	Positive	Negative	1	Luminal A	8	non-HER2A		2	1.00453	10.8829	11.394	6.78623	8.76601
MB-5281	Negative	Negative	1	Luminal A	4-	non-HER2A	Positive	2	1.02047	11.8333	7.12427	6.7314	9.03658
MB-5284	Positive	Positive	NA	Luminal A	3	non-HER2A		4	1.23465	10.7481	11.5878	8.08583	8.89633
MB-5287	Positive	Positive	NA	Luminal A	3	non-HER2A		2	1.07646	11.1389	10.4879	8.17237	8.3381
MB-5288	Positive	Negative	NA	Luminal B	3	non-HER2A		1	0.54691	10.2274	11.6136	6.77884	10.6295
MB-5289	Positive	Positive	NA	Luminal A	NA	non-HER2A		3	1.05306	11.1038	11.8264	7.69744	8.84908
MB-5290	Positive	Positive	NA	Luminal A	8	non-HER2A		2	1.02047	11.5568	12.1245	7.34493	8.87337
MB-5291	Positive	Positive	NA	Luminal B	9	non-HER2A		3	1.53071	11.2722	12.7166	7.06049	8.60587
MB-5293	Positive	Positive	NA	Luminal A	3	non-HER2A		2	0.639084	10.6713	12.3513	7.18563	9.74217
MB-5294	Negative	Positive	NA	Basal-like	10	non-HER2A	Negative	3	0.925985	9.57179	6.99552	6.93735	6.91875
MB-5296	Positive	Negative	NA	Basal-like	5	HER2A		7	2.16063	14.0993	7.602	6.80492	7.36484
MB-5300	Positive	Positive	NA	Luminal A	8	non-HER2A		3	1.5554	11.2208	11.4397	7.11843	8.08227
MB-5305	Positive	Positive	NA	Luminal A	8	non-HER2A		3	1.48361	11.6882	11.0128	8.27313	8.65741
MB-5306	Positive	Negative	NA	Luminal A	7	non-HER2A		3	1.61549	12.133	11.4015	6.81693	8.4027
MB-5310	Positive	Negative	NA	Luminal A	3	non-HER2A		3	1.06977	9.98924	11.4578	6.98352	8.63784
MB-5312	Negative	Negative	NA	HER2E	5	HER2A	Positive	5	2.59301	13.0715	7.15468	6.81517	7.55884
MB-5313	Positive	Positive	NA	HER2E	1	non-HER2A		2	1.0372	11.0795	9.54236	7.03617	7.63992
MB-5317	Positive	Positive	NA	Luminal B	8	non-HER2A		2	1.1291	9.54807	12.7231	9.35704	8.34096
MB-5322	Positive	Negative	NA	Luminal A	2	non-HER2A		2	1.0715	10.6592	10.9484	6.79973	8.45186
MB-5323	Negative	Negative	NA	Basal-like	4-	non-HER2A	Negative	2	1.0372	9.17368	7.43408	6.89328	7.00716
MB-5324	Positive	Positive	NA	Luminal A	3	non-HER2A		2	1.0372	10.6472	11.7801	7.39684	7.7916
MB-5327	Negative	Negative	NA	HER2E	5	HER2A	Positive	9	3.51851	12.8845	7.06429	6.8146	8.3103
MB-5329	Negative	Negative	NA	Luminal A	2	non-HER2A	Positive	3	0.842751	10.7304	8.60523	6.82445	7.98108
MB-5330	Positive	Positive	1	Luminal A	8	non-HER2A		2	1.0372	10.4642	10.1265	8.16952	8.42588
MB-5331	Positive	Negative	3	Luminal A	2	HER2A		8	4.08189	14.3314	11.4919	7.00189	8.20062
MB-5334	Positive	Positive	NA	Luminal A	9	non-HER2A		4	1.14179	11.5595	9.79015	7.57542	8.50876
MB-5335	Negative	Negative	NA	Basal-like	10	non-HER2A	Negative	2	0.89163	9.80864	6.90014	6.77521	6.94952
MB-5341	Positive	Positive	NA	Luminal B	2	non-HER2A		2	1.07646	10.7255	12.1756	8.47796	8.86869
MB-5347	Positive	Positive	NA	Luminal B	3	non-HER2A		2	1.0372	9.9194	11.0755	8.28075	8.92164
MB-5348	Negative	Negative	NA	Basal-like	10	non-HER2A	Negative	3	0.94092	9.94825	7.29393	6.88289	6.89741
MB-5349	Positive	Positive	NA	Luminal A	NA	non-HER2A		4	1.15787	10.1031	11.3189	7.57315	8.07176
MB-5350	Positive	Negative	NA	Luminal B	4+	non-HER2A		4	1.09268	9.80632	10.4825	6.76759	8.00658
MB-5358	Positive	Negative	NA	Luminal A	3	non-HER2A		2	1.02047	10.9577	9.88208	6.81952	8.11594
MB-5360	Positive	Negative	NA	Luminal A	8	non-HER2A		2	1.07646	11.2977	12.3369	6.85567	9.34875
MB-5369	Positive	Positive	NA	Luminal A	8	non-HER2A		3	1.5809	10.9207	11.8298	7.98642	8.66511
MB-5370	Positive	Positive	NA	Luminal B	8	non-HER2A		2	1.09354	10.1534	11.4945	8.35237	8.05072
MB-5377	Negative	Positive	NA	Luminal B	8	non-HER2A	Positive	2	1.05393	10.753	11.9145	8.2626	9.20902
MB-5381	Negative	Negative	NA	HER2E	5	HER2A	Positive	5	2.55118	13.5273	7.74828	6.86302	9.68182
MB-5382	Positive	Positive	NA	Luminal A	7	non-HER2A		2	1.11118	10.5374	10.5962	8.21366	9.08907
MB-5383	Positive	Positive	NA	Luminal A	8	non-HER2A		2	1.00428	10.8256	11.643	7.29418	7.34604
MB-5384	Positive	Positive	NA	Luminal A	1	non-HER2A		5	1.47068	11.4552	9.89613	7.03823	8.59879
MB-5385	Positive	Positive	NA	Luminal A	NA	non-HER2A		2	1.03693	10.1138	12.6492	7.95596	9.22859
MB-5386	Positive	Positive	NA	Luminal B	7	non-HER2A		3	1.6941	11.1493	12.112	7.34451	9.11949
MB-5387	Negative	Negative	NA	Basal-like	NA	non-HER2A	Negative	1	0.573807	10.4247	7.11317	6.73747	6.86832
MB-5388	Positive	Positive	NA	Luminal A	7	non-HER2A		2	1.03693	10.2695	11.6943	8.6421	9.35923
MB-5389	Positive	Positive	NA	Luminal A	7	non-HER2A		2	1.1294	11.0956	12.596	9.16303	7.26474
MB-5392	Negative	Negative	NA	HER2E	4-	non-HER2A	Positive	2	1.03693	10.4436	7.42741	6.79995	8.53982
MB-5393	Positive	Positive	NA	Luminal B	7	non-HER2A		2	1.05449	9.19513	11.9697	7.6086	8.51024
MB-5394	Positive	Negative	NA	HER2E	NA	HER2A		5	2.63483	14.2591	8.03706	6.85397	9.22859
MB-5395	Positive	Positive	NA	Luminal A	3	non-HER2A		2	1.09354	11.3692	10.982	8.54501	7.80594
MB-5398	Positive	Positive	NA	Luminal A	4+	non-HER2A		2	1.11118	11.1079	12.1288	9.27485	8.86907
MB-5401	Positive	Positive	NA	Luminal A	7	non-HER2A		2	1.00428	10.5225	10.1888	8.47125	8.62113
MB-5402	Positive	Positive	NA	Luminal A	7	non-HER2A		3	1.64032	11.5708	11.5935	6.95553	8.49144
MB-5403	Positive	Positive	NA	Luminal A	8	non-HER2A		2	0.988584	10.3652	11.966	9.63149	8.14812
MB-5404	Positive	Positive	NA	Luminal A	8	non-HER2A		2	1.0372	10.4577	11.5024	7.54285	9.16639
MB-5405	Positive	Negative	NA	Luminal B	3	non-HER2A		2	1.05449	10.0791	11.1493	6.76002	8.69575
MB-5406	Positive	Positive	NA	Luminal B	9	non-HER2A		3	1.35902	10.8988	11.3815	7.93546	8.20354
MB-5409	Negative	Negative	NA	HER2E	5	HER2A	Positive	4	2.10786	14.0153	7.48548	6.84889	8.48735
MB-5410	Positive	Positive	NA	Luminal A	8	non-HER2A		4	1.25456	11.5708	11.8333	7.2139	8.38879
MB-5412	Positive	Positive	NA	Luminal A	3	non-HER2A		2	0.97439	11.0243	9.96279	7.58501	8.20728
MB-5414	Positive	Negative	NA	Luminal B	9	HER2A		11	4.82487	13.5357	9.97155	6.70264	7.87335
MB-5417	Negative	Negative	NA	HER2E	5	HER2A	Positive	10	3.53717	14.6945	6.96285	6.71568	8.94556
MB-5418	Positive	Positive	NA	Luminal B	5	HER2A		5	2.69114	14.4438	10.8376	7.49396	9.33233
MB-5420	Positive	Negative	NA	Basal-like	5	non-HER2A		3	1.58173	13.0952	8.85634	6.91148	7.68837
MB-5422	Positive	Positive	NA	Luminal A	6	non-HER2A		2	1.1294	10.841	10.5266	7.87522	8.18012
MB-5424	Positive	Positive	NA	Luminal A	2	non-HER2A		2	1.0372	10.0839	11.1684	7.56355	9.07091
MB-5425	Positive	Positive	NA	Luminal A	7	non-HER2A		2	1.05393	10.628	11.4734	7.74761	8.86673
MB-5426	Negative	Positive	NA	Basal-like	10	HER2A	Negative	6	3.06142	14.0258	7.33538	7.01761	7.79018
MB-5427	Negative	Negative	NA	Basal-like	9	non-HER2A	Negative	2	1.1633	11.1099	6.88476	6.78674	6.88683
MB-5428	Positive	Positive	NA	Luminal A	4+	non-HER2A		2	1.02047	10.7162	11.2164	7.14413	8.4406
MB-5431	Positive	Positive	NA	Basal-like	4+	non-HER2A		3	0.829374	9.5506	8.93662	6.99101	7.44711
MB-5432	Positive	Positive	NA	Luminal A	7	non-HER2A		4	1.12367	10.2274	11.5346	7.70151	8.36363
MB-5433	Positive	Positive	NA	Luminal A	7	non-HER2A		5	1.4944	11.286	11.8437	7.04192	8.45428
MB-5434	Positive	Positive	NA	Luminal B	9	non-HER2A		3	1.02746	10.472	11.1834	7.59747	8.51865
MB-5435	Positive	Positive	NA	Luminal B	9	non-HER2A		2	1.1294	10.6728	11.3025	7.85851	8.76101
MB-5440	Negative	Negative	NA	Basal-like	10	non-HER2A	Negative	3	0.925985	10.3337	7.40058	6.80431	7.02261
MB-5441	Negative	Negative	NA	HER2E	4-	non-HER2A	Positive	2	1.03693	13.2499	7.39916	6.85389	10.5806
MB-5444	Positive	Positive	NA	Luminal A	7	non-HER2A		2	1.05393	10.4838	10.3547	8.11801	8.13287
MB-5446	Negative	Negative	NA	HER2E	4-	non-HER2A	Positive	3	0.819511	10.3005	7.30579	6.76112	9.76595
MB-5447	Positive	Positive	NA	Luminal B	6	non-HER2A		4	1.42636	10.2982	10.6561	7.31471	8.23289
MB-5451	Positive	Positive	NA	Luminal A	8	non-HER2A		2	1.05393	11.177	11.0186	7.84225	8.61333
MB-5452	Positive	Positive	NA	Luminal A	2	non-HER2A		2	0.906491	11.0996	11.7257	7.04705	8.50094
MB-5454	Positive	Negative	NA	Luminal B	10	non-HER2A		3	1.10485	10.3005	8.67219	6.73298	7.74761
MB-5457	Positive	Positive	NA	Luminal A	3	non-HER2A		2	1.0372	10.6592	9.50297	6.94759	8.44232
MB-5459	Positive	Negative	NA	Luminal B	5	HER2A		10	3.03762	14.2063	10.6682	6.79049	10.0196
MB-5463	Positive	Positive	NA	Luminal B	9	non-HER2A		2	1.05393	11.3475	11.4839	7.11882	8.28154
MB-5464	Positive	Positive	NA	Luminal A	4+	non-HER2A		2	1.07699	10.2552	11.2318	8.9111	8.13265
MB-5472	Positive	Positive	NA	Luminal A	8	non-HER2A		3	0.842751	10.1765	12.4424	7.94197	8.49948
MB-5473	Positive	Positive	NA	Luminal A	3	non-HER2A		2	0.943457	10.3154	10.582	7.36807	8.5277
MB-5474	Negative	Negative	NA	HER2E	5	HER2A	Positive	4	2.15292	13.6627	7.14748	6.8028	7.76281
MB-5475	Positive	Positive	NA	Luminal B	2	non-HER2A		2	1.09382	11.0735	12.0953	6.97431	8.28443
MB-5477	Positive	Positive	NA	Luminal B	3	non-HER2A		2	1.11118	10.275	12.1415	7.78983	8.27867
MB-5478	Positive	Negative	NA	Luminal A	3	non-HER2A		2	1.11118	9.80173	10.4852	6.90074	8.55715
MB-5482	Negative	Negative	NA	Basal-like	10	non-HER2A	Negative	2	1.03693	10.532	7.72393	6.86405	7.31322
MB-5483	Negative	Negative	NA	HER2E	5	HER2A	Positive	10	4.94537	13.6719	7.52026	6.85118	8.67185
MB-5484	Positive	Positive	NA	Luminal A	7	non-HER2A		2	1.02047	11.0243	9.12743	8.14579	8.51743
MB-5486	Positive	Positive	NA	Luminal B	9	non-HER2A		1	0.555591	9.9946	12.2329	7.57161	8.96054
MB-5497	Positive	Positive	NA	Luminal B	1	non-HER2A		1	0.518601	9.55568	11.9181	7.15246	8.1265
MB-5499	Positive	Positive	NA	Luminal A	4+	non-HER2A		2	1.09354	10.5722	10.2444	7.29955	8.83875
MB-5505	Positive	Positive	NA	Luminal B	3	non-HER2A		2	0.833163	10.7115	12.0154	7.93616	9.79326
MB-5511	Negative	Positive	NA	HER2E	10	non-HER2A	Positive	3	1.31587	10.9858	6.99964	7.02382	9.76595
MB-5513	Positive	Positive	NA	Basal-like	6	non-HER2A		1	0.555591	8.94473	9.93003	7.38907	8.75594
MB-5514	Positive	Positive	NA	Luminal A	4+	non-HER2A		2	1.05449	9.81491	12.8917	7.43616	8.89317
MB-5519	Positive	Positive	NA	Luminal A	8	non-HER2A		2	0.943457	10.6048	11.1813	7.25665	8.80188
MB-5520	Positive	Negative	NA	Luminal A	7	non-HER2A		1	0.510237	9.62065	8.935	6.81782	7.93368
MB-5521	Positive	Negative	NA	Luminal B	4+	non-HER2A		2	1.05393	9.4841	9.6699	6.82496	7.40292
MB-5525	Positive	Negative	NA	Luminal B	7	non-HER2A		4	1.19552	10.364	12.0667	6.75869	8.12076
MB-5526	Negative	Negative	NA	Basal-like	10	non-HER2A	Negative	2	1.03693	9.56792	6.86856	6.82789	7.85092
MB-5527	Negative	Negative	NA	HER2E	4-	non-HER2A	Positive	2	1.0599	12.9574	7.01129	6.75638	7.61262
MB-5530	Positive	Positive	NA	Basal-like	7	non-HER2A		2	1.05449	9.86179	10.5334	8.4245	7.96118
MB-5531	Negative	Negative	NA	Basal-like	10	non-HER2A	Negative	3	0.958868	9.28373	6.93568	6.87242	6.8908
MB-5541	Positive	Positive	NA	Luminal A	4+	HER2A		5	2.59233	11.9846	10.5212	6.94802	8.2292
MB-5543	Positive	Positive	NA	Luminal A	3	non-HER2A		1	0.378535	9.63885	10.8039	7.11513	8.51325
MB-5550	Positive	Positive	NA	Luminal A	3	non-HER2A		2	1.09354	10.7514	12.0628	7.25433	8.7581
MB-5552	Positive	Positive	NA	Luminal B	6	non-HER2A		3	1.39272	10.1673	11.1642	7.0164	7.18748
MB-5553	Positive	Positive	NA	Luminal B	2	non-HER2A		2	1.1633	10.0754	11.3644	8.45655	8.51235
MB-5554	Positive	Positive	NA	Luminal A	2	non-HER2A		2	1.1633	10.7774	11.2745	7.07711	8.2098
MB-5556	Positive	Negative	NA	Luminal B	1	non-HER2A		4	1.19552	10.2684	11.9924	6.81195	8.10023
MB-5559	Negative	Positive	NA	Basal-like	10	non-HER2A	Negative	2	1.02047	10.0187	8.35854	7.21031	7.49272
MB-5562	Positive	Positive	NA	Luminal B	2	non-HER2A		2	1.02047	10.0498	12.7231	7.38128	8.69921
MB-5563	Positive	Negative	NA	Luminal A	3	non-HER2A		3	1.58173	12.6257	9.95594	6.92481	7.96824
MB-5565	Negative	Positive	NA	Basal-like	10	non-HER2A	Negative	3	0.896642	9.30328	7.09114	6.90148	6.86635
MB-5566	Negative	Negative	NA	Basal-like	10	non-HER2A	Negative	3	0.856566	10.3759	6.94151	6.72506	7.03681
MB-5567	Positive	Positive	NA	Luminal A	3	non-HER2A		3	0.856343	10.7162	12.0389	7.11152	8.6601
MB-5571	Positive	Positive	NA	Luminal A	7	non-HER2A		2	1.05393	10.1129	11.005	7.17834	8.55684
MB-5572	Negative	Negative	NA	Basal-like	10	non-HER2A	Negative	2	1.05393	9.58021	7.31353	6.68933	7.165
MB-5577	Positive	Negative	NA	HER2E	3	non-HER2A		2	1.03693	9.42646	7.92152	6.85263	8.24172
MB-5579	Positive	Positive	NA	Luminal A	2	non-HER2A		1	0.510237	9.61795	10.9043	7.25461	8.95134
MB-5582	Positive	Positive	NA	Luminal A	3	non-HER2A		2	1.05449	10.897	10.7758	7.08702	8.94032
MB-5583	Positive	Positive	NA	Luminal A	7	non-HER2A		2	1.07699	10.8358	9.57246	7.18826	8.73887
MB-5585	Positive	Negative	NA	Luminal A	NA	non-HER2A		2	1.07699	11.3284	9.7833	6.69028	7.68837
MB-5589	Positive	Positive	NA	Luminal A	8	non-HER2A		2	1.02047	10.855	12.0667	7.42416	8.64014
MB-5591	Positive	Positive	NA	Luminal A	3	non-HER2A		2	1.05393	9.94308	10.5158	8.25515	8.91393
MB-5592	Positive	Positive	NA	Luminal B	8	non-HER2A		2	1.0715	11.114	10.6106	7.32818	8.35184
MB-5593	Negative	Negative	NA	HER2E	5	HER2A	Positive	4	2.04095	13.9052	6.93483	6.85412	7.63976
MB-5599	Positive	Positive	NA	Luminal A	7	non-HER2A		2	1.05393	9.28086	11.223	7.57067	8.88128
MB-5601	Positive	Negative	NA	Luminal A	3	non-HER2A		2	0.863325	9.61591	11.8333	6.77024	9.71156
MB-5602	Negative	Negative	NA	Basal-like	10	non-HER2A	Positive	3	0.842751	10.1816	6.91687	6.76732	8.59749
MB-5603	Positive	Negative	NA	Luminal A	2	non-HER2A		2	1.09354	10.1177	11.0281	6.91437	8.19055
MB-5604	Positive	Positive	NA	Luminal B	1	non-HER2A		4	1.94675	11.7768	12.4013	7.03415	7.86039
MB-5605	Positive	Positive	NA	Luminal B	3	non-HER2A		2	1.14822	10.6958	9.68744	7.96118	8.02042
MB-5616	Negative	Negative	NA	Basal-like	10	non-HER2A	Negative	2	0.906011	9.02042	6.99356	6.7856	7.29457
MB-5617	Positive	Positive	NA	Luminal A	4+	non-HER2A		1	0.487453	7.54008	12.782	9.24544	8.9063
MB-5620	Positive	Positive	NA	Luminal A	8	non-HER2A		4	1.27817	10.753	11.6372	7.87541	8.35265
MB-5622	Positive	Positive	NA	Luminal B	1	non-HER2A		3	1.1356	10.0088	11.2362	7.3305	8.59461
MB-5626	Positive	Negative	NA	Luminal A	8	non-HER2A		3	1.2699	10.8917	12.0427	6.85005	9.32849
MB-5628	Positive	Positive	NA	Luminal B	5	HER2A		12	4.41824	13.3079	11.3284	7.13009	9.72166
MB-5629	Positive	Positive	NA	Luminal A	3	non-HER2A		2	1.05449	10.4385	9.34656	7.51692	8.8983
MB-5632	Positive	Negative	NA	Luminal B	9	HER2A		7	2.09311	11.007	10.3097	6.96179	7.99138
MB-5633	Negative	Negative	NA	Basal-like	4-	non-HER2A	Negative	2	1.0372	8.76855	7.06299	6.83863	7.37311
MB-5635	Positive	Negative	NA	Luminal A	4+	non-HER2A		3	1.74495	10.8341	8.43718	6.92197	7.80078
MB-5636	Positive	Positive	NA	Luminal B	9	non-HER2A		5	1.36585	11.1599	11.0457	7.06208	8.82547
MB-5642	Positive	Positive	NA	Luminal A	4+	non-HER2A		2	1.14761	10.3559	12.2467	7.88814	8.79264
MB-5645	Positive	Positive	NA	Luminal A	7	non-HER2A		2	1.1291	10.8073	12.3465	8.48441	8.86751
MB-5647	Positive	Negative	NA	Luminal A	6	non-HER2A		2	1.09382	10.5693	12.0547	6.75158	8.13908
MB-5648	Positive	Positive	NA	Luminal A	NA	non-HER2A		2	0.877249	10.5736	11.7574	8.4094	8.20883
MB-5651	Negative	Negative	NA	Basal-like	3	non-HER2A	Negative	3	0.925985	9.30059	6.92795	6.61302	7.59896
MB-5653	Positive	Negative	NA	Luminal B	9	non-HER2A		2	0.958674	10.3302	10.8988	6.71619	8.49116
MB-5654	Positive	Positive	NA	Luminal B	8	non-HER2A		2	1.02047	10.0649	12.1203	8.90709	9.90688
MB-5655	Negative	Negative	NA	Basal-like	10	non-HER2A	Negative	2	0.943457	10.0007	7.38549	6.85128	7.05005
MB-6001	Positive	Negative	NA	Luminal A	3	non-HER2A		2	1.07699	10.7449	12.6078	6.81339	8.06804
MB-6006	Positive	Positive	NA	Luminal A	3	non-HER2A		2	0.989074	9.64635	10.9484	7.96482	8.11825
MB-6007	Positive	Negative	NA	HER2E	3	non-HER2A		2	0.62728	10.3939	11.4866	6.87488	9.26343
MB-6011	Positive	Negative	NA	Luminal B	1	HER2A		4	2.15398	11.0956	11.5319	6.80425	8.27313
MB-6012	Positive	Positive	NA	Luminal A	8	non-HER2A		2	0.97439	10.9839	11.9772	7.92152	9.26187
MB-6016	Positive	Positive	NA	Luminal A	4+	non-HER2A		2	1.05449	10.1119	11.9886	7.80594	8.88521
MB-6017	Positive	Positive	NA	Luminal A	3	non-HER2A		2	1.07699	10.3939	11.6821	9.04761	8.16871
MB-6018	Positive	Positive	NA	Luminal A	8	non-HER2A		2	0.943457	10.4448	11.0634	8.12943	8.57592
MB-6020	Positive	Negative	NA	Luminal B	NA	HER2A		8	2.50912	12.7557	10.9559	6.83569	8.55032
MB-6029	Positive	Positive	NA	Luminal A	7	non-HER2A		2	1.0372	11.0204	10.9171	8.51865	8.65472
MB-6030	Positive	Positive	NA	Luminal A	7	non-HER2A		2	0.989074	10.476	11.9216	7.44443	8.42112
MB-6049	Positive	Positive	NA	HER2E	5	HER2A		9	2.82276	13.2742	9.80864	7.83179	7.84033
MB-6050	Positive	Positive	NA	Luminal A	8	non-HER2A		2	0.958923	10.4372	10.6958	8.69506	9.01654
MB-6051	Positive	Negative	NA	Luminal A	3	non-HER2A		2	1.02047	10.824	10.8864	6.78609	8.21124
MB-6052	Negative	Negative	NA	Basal-like	4-	non-HER2A	Negative	2	1.0599	9.90562	7.9054	6.81914	7.60037
MB-6055	Negative	Negative	NA	Basal-like	10	non-HER2A	Negative	3	0.882409	8.94514	6.92463	6.75584	6.82393
MB-6058	Negative	Negative	NA	Basal-like	10	non-HER2A	Negative	1	0.619631	8.66246	7.06122	6.80589	6.90178
MB-6065	Positive	Positive	NA	Luminal A	8	non-HER2A		2	1.07699	11.0694	11.7899	7.19391	8.77292
MB-6068	Negative	Positive	NA	Basal-like	4-	non-HER2A	Negative	2	1.0372	9.83531	7.39186	7.03305	7.12074
MB-6069	Positive	Positive	NA	Luminal A	7	non-HER2A		2	1.00428	10.5962	11.5935	8.40466	8.53073
MB-6075	Positive	Positive	NA	Luminal B	7	non-HER2A		3	1.53071	11.1244	11.7384	6.99877	7.9024
MB-6079	Positive	Negative	NA	Luminal B	9	non-HER2A		4	1.32008	11.1368	11.0997	6.89499	7.08655
MB-6080	Positive	Positive	NA	Luminal B	4+	non-HER2A		2	1.0599	10.532	11.0378	7.27495	8.13885
MB-6083	Positive	Positive	NA	Luminal A	8	non-HER2A		4	1.25489	11.5211	11.2384	7.74887	8.35665
MB-6085	Negative	Negative	NA	HER2E	4-	HER2A	Positive	5	2.59233	13.7172	6.91262	6.842	8.46589
MB-6097	Positive	Negative	NA	Luminal A	8	non-HER2A		2	1.07699	11.8931	10.45	6.96032	8.48619
MB-6100	Negative	Negative	NA	HER2E	5	HER2A	Positive	6	3.33355	14.134	7.58078	6.86488	7.82487
MB-6105	Positive	Positive	NA	HER2E	7	non-HER2A		2	1.0599	13.5181	10.6354	7.11828	7.94
MB-6108	Positive	Positive	NA	Luminal A	4+	non-HER2A		2	1.05449	12.2329	9.71945	7.08921	8.04919
MB-6114	Negative	Positive	NA	HER2E	5	HER2A	Positive	7	2.27287	13.3507	9.62944	7.42342	8.42758
MB-6116	Negative	Positive	NA	HER2E	5	HER2A	Positive	10	3.68186	14.0885	9.62804	6.98099	7.81091
MB-6131	Positive	Negative	NA	HER2E	5	HER2A		4	2.36296	12.965	6.9939	6.70581	8.62408
MB-6133	Positive	Negative	NA	Luminal A	3	non-HER2A		2	1.14822	10.8307	11.1389	6.72038	8.89196
MB-6135	Positive	Positive	NA	Luminal B	9	non-HER2A		2	1.0372	10.1673	10.6928	7.65841	8.12397
MB-6138	Positive	Negative	NA	Luminal B	3	non-HER2A		4	1.10611	9.85213	9.66576	6.89348	8.31812
MB-6141	Positive	Negative	NA	Luminal B	8	non-HER2A		3	1.53071	10.784	11.2768	6.76172	8.44346
MB-6143	Negative	Negative	NA	Basal-like	9	non-HER2A	Negative	3	1.17253	9.98043	7.23325	6.84272	6.98969
MB-6144	Positive	Negative	NA	Basal-like	10	non-HER2A		2	1.0372	9.27537	7.26221	6.84041	6.97856
MB-6145	Positive	Negative	NA	Luminal B	7	non-HER2A		1	0.510237	10.9007	11.2407	6.80015	7.8977
MB-6149	Positive	Positive	NA	Luminal A	7	non-HER2A		3	1.50679	11.7321	11.5077	7.06512	8.02126
MB-6154	Positive	Positive	NA	Luminal B	8	non-HER2A		2	1.05393	10.1544	10.0169	8.08517	8.58225
MB-6156	Positive	Positive	NA	HER2E	5	HER2A		5	2.77796	14.4271	8.35372	7.11174	7.71051
MB-6157	Positive	Negative	NA	Basal-like	5	HER2A		14	5.47181	14.1575	10.3951	6.81112	7.59807
MB-6164	Positive	Positive	NA	Luminal B	3	non-HER2A		2	1.14761	10.3976	11.293	8.18434	8.73923
MB-6167	Positive	Negative	NA	Luminal A	8	non-HER2A		2	1.0599	10.0406	11.8507	6.83694	8.40216
MB-6168	Positive	Positive	NA	Luminal A	7	non-HER2A		2	1.05393	10.2201	9.53982	7.69905	8.63515
MB-6181	Positive	Positive	NA	Luminal A	8	non-HER2A		4	1.15787	11.7768	11.4628	8.53741	7.84097
MB-6184	Positive	Positive	NA	HER2E	2	non-HER2A		2	0.684975	9.00878	10.4436	7.49647	8.70369
MB-6188	Negative	Negative	NA	Basal-like	10	non-HER2A	Negative	3	0.896875	10.0801	7.16161	6.86229	7.88317
MB-6189	Positive	Positive	NA	Luminal B	7	non-HER2A		2	1.07699	10.1314	11.7833	7.34636	8.25466
MB-6190	Positive	Negative	NA	Luminal A	4+	non-HER2A		2	1.07646	10.7709	12.3611	6.88668	7.25936
MB-6195	Positive	Negative	NA	Luminal A	3	non-HER2A		4	1.42636	10.2883	10.7288	6.7553	8.37235
MB-6200	Positive	Negative	NA	Luminal A	9	non-HER2A		2	1.07646	10.2982	10.9355	6.84479	8.14207
MB-6201	Positive	Positive	NA	Luminal B	9	non-HER2A		4	1.14179	10.8273	11.234	7.61383	8.43718
MB-6206	Positive	Positive	NA	Luminal A	NA	non-HER2A		2	1.09382	11.3766	11.7997	8.3911	9.3394
MB-6207	Positive	Negative	NA	Luminal A	8	non-HER2A		3	0.829374	10.0906	11.585	6.92445	8.65405
MB-6211	Positive	Positive	NA	Luminal A	8	non-HER2A		4	1.25489	10.908	11.6107	8.0951	9.38953
MB-6212	Positive	Positive	NA	Luminal A	7	non-HER2A		2	1.02047	10.2022	11.9325	7.24998	8.83118
MB-6213	Positive	Positive	NA	Luminal A	NA	non-HER2A		2	1.07646	11.0398	12.2241	8.45855	9.24896
MB-6217	Negative	Positive	NA	Luminal B	9	non-HER2A	Positive	6	1.73681	11.6254	10.4526	7.13131	7.9954
MB-6224	Negative	Positive	NA	HER2E	5	HER2A	Positive	8	2.21166	13.4385	7.01765	6.68268	8.19988
MB-6225	Positive	Positive	NA	Luminal A	7	non-HER2A		2	1.0599	10.1836	11.5374	7.49667	8.17683
MB-6228	Negative	Positive	NA	Basal-like	4-	non-HER2A	Negative	2	1.05393	9.60061	7.18902	6.96783	7.59947
MB-6229	Positive	Positive	NA	Luminal A	8	non-HER2A		2	1.07699	10.7177	10.8603	7.29423	8.1611
MB-6230	Positive	Positive	NA	Luminal A	NA	non-HER2A		2	1.16674	10.4603	10.1673	7.12889	8.00596
MB-6233	Positive	Positive	NA	Luminal B	8	non-HER2A		2	1.0372	10.0516	12.2837	7.75288	8.30328
MB-6238	Positive	Positive	NA	Luminal A	7	non-HER2A		2	1.07699	11.3427	11.6638	7.37901	8.29043
MB-6245	Negative	Negative	NA	Basal-like	10	non-HER2A	Negative	1	0.600116	8.81602	6.90809	6.90095	7.02324
MB-6253	Positive	Positive	NA	Luminal A	8	non-HER2A		2	1.0372	10.6897	12.4216	7.57934	8.94556
MB-6254	Positive	Positive	NA	Luminal B	2	non-HER2A		2	1.11118	9.21853	11.6578	7.04643	8.64733
MB-6256	Positive	Positive	NA	Luminal A	3	non-HER2A		2	1.11118	10.0133	11.7321	7.84171	8.71889
MB-6257	Positive	Positive	NA	Luminal B	8	non-HER2A		3	1.17253	10.4099	10.3464	8.77809	8.21752
MB-6263	Positive	Negative	NA	Luminal A	4+	non-HER2A		2	0.781891	9.62604	10.4111	6.87485	8.27613
MB-6271	Positive	Negative	NA	Luminal A	7	non-HER2A		2	0.607678	11.0438	12.6137	6.76894	10.1324
MB-6280	Negative	Negative	NA	Basal-like	10	non-HER2A	Negative	2	0.696204	9.52792	7.11233	6.83981	6.9917
MB-6281	Positive	Positive	NA	Luminal B	6	non-HER2A		4	1.21536	10.554	11.6078	7.32273	7.92799
MB-6283	Positive	Positive	NA	Luminal A	7	non-HER2A		2	1.07646	10.5778	12.3465	7.08833	8.50994
MB-6286	Positive	Positive	NA	Luminal A	3	non-HER2A		2	1.05393	11.5431	11.4015	7.15708	8.1827
MB-6288	Positive	Positive	NA	Luminal B	6	non-HER2A		3	1.21007	9.93719	11.1202	6.99276	7.68198
MB-6297	Positive	Negative	NA	Luminal A	8	non-HER2A		4	1.97717	12.4477	11.0614	6.87502	7.80931
MB-6305	Negative	Negative	NA	Basal-like	10	HER2A	Negative	10	3.90844	11.8197	7.15798	6.79011	7.13667
MB-6314	Positive	Negative	NA	HER2E	1	HER2A		5	2.82276	14.0362	10.1877	6.77946	8.38972
MB-6318	Positive	Negative	NA	HER2E	10	non-HER2A		2	0.74524	10.1663	7.14018	6.82379	7.98807
MB-6322	Positive	Negative	NA	Luminal B	4+	non-HER2A		3	1.04404	10.3843	10.8273	6.81959	8.23487
MB-6327	Positive	Negative	NA	Luminal B	7	non-HER2A		2	1.02047	8.45101	12.3417	6.9486	8.85482
MB-6328	Positive	Positive	NA	Luminal A	2	non-HER2A		2	1.23958	10.6867	12.6979	8.00039	9.10469
MB-6330	Negative	Negative	NA	HER2E	4-	HER2A	Positive	4	2.10786	14.1697	7.63192	6.84141	8.77953
MB-6336	Negative	Negative	NA	Basal-like	2	non-HER2A	Negative	2	0.97439	9.55504	7.02539	6.76341	7.04587
MB-6337	Negative	Negative	NA	Basal-like	5	HER2A	Positive	9	2.8235	14.5997	7.215	6.85669	8.24593
MB-6344	Positive	Negative	NA	Luminal B	1	non-HER2A		2	1.21959	10.5334	11.8298	6.86017	7.95315
MB-6346	Positive	Positive	NA	Luminal B	8	non-HER2A		2	1.1291	10.7906	12.0628	7.05733	8.52319
MB-6359	Positive	Negative	NA	HER2E	6	non-HER2A		3	1.82939	11.3692	10.4436	6.81624	7.21491
MB-6363	Negative	Negative	NA	Basal-like	5	HER2A	Positive	5	2.59301	13.5984	7.79885	6.8652	8.74959
MB-7001	Positive	Negative	3	Luminal A	5	HER2A		6	3.11161	13.087	11.4761	6.79781	8.04004
MB-7002	Positive	Positive	1	Luminal B	4+	non-HER2A		1	0.538496	9.76109	10.9765	7.03057	8.2833
MB-7004	Positive	Negative	1	Luminal A	8	non-HER2A		2	1.02047	10.218	12.453	6.74511	8.2292
MB-7005	Positive	Negative	1	Luminal B	8	non-HER2A		2	1.00453	10.0677	11.0359	6.83875	8.2214
MB-7006	Positive	Positive	1	Luminal A	3	non-HER2A		2	1.05393	10.8585	10.8376	7.07831	7.89175
MB-7008	Negative	Negative	1	Basal-like	4-	non-HER2A	Positive	2	1.05449	9.52601	7.0699	6.76365	8.69971
MB-7009	Negative	Negative	1	Basal-like	10	non-HER2A	Negative	2	1.07699	9.19985	6.87225	6.75001	6.85424
MB-7010	Positive	Positive	1	Luminal A	7	non-HER2A		2	1.05449	10.6354	11.7734	7.42916	8.20764
MB-7013	Positive	Positive	3	Luminal A	8	non-HER2A		2	1.02047	11.0556	11.6312	9.73773	8.13262
MB-7015	Positive	Positive	1	Luminal B	8	non-HER2A		4	1.04762	10.4185	10.8291	8.06937	8.22019
MB-7017	Negative	Negative	1	Basal-like	10	non-HER2A	Negative	1	0.573807	9.76978	6.92946	6.7203	6.99085
MB-7019	Positive	Positive	1	Luminal B	3	non-HER2A		2	0.97439	10.0124	10.7823	7.56482	7.89405
MB-7022	Positive	Positive	1	Luminal B	8	non-HER2A		4	1.14209	10.9727	10.1207	8.24568	7.98891
MB-7025	Negative	Negative	1	Basal-like	4-	non-HER2A	Negative	2	1.0372	8.6916	7.03934	6.88862	7.13561
MB-7026	Positive	Positive	1	Luminal B	3	non-HER2A		2	1.0372	10.5428	8.68778	8.01851	8.1356
MB-7029	Positive	Positive	1	Luminal A	4+	non-HER2A		1	0.54691	9.52222	10.3688	7.47046	8.3373
MB-7030	Positive	Negative	1	Basal-like	4-	non-HER2A		2	1.03693	10.0791	7.18681	6.67761	6.83233
MB-7031	Negative	Negative	3	Basal-like	10	non-HER2A	Negative	2	0.806916	10.6324	7.61941	6.81754	6.97662
MB-7032	Positive	Positive	1	Luminal A	3	non-HER2A		4	1.09268	10.6413	11.2384	7.13684	8.94194
MB-7034	Positive	Positive	1	Luminal A	3	non-HER2A		2	1.02047	9.20357	11.4423	7.05582	8.00804
MB-7036	Negative	Negative	NA	Basal-like	10	non-HER2A	Negative	2	0.724684	9.24442	6.86044	6.79348	7.15334
MB-7037	Positive	Positive	3	Luminal A	8	non-HER2A		2	1.1291	11.5514	12.1078	8.02042	9.04362
MB-7039	Positive	Negative	1	Basal-like	4-	non-HER2A		2	1.03693	10.0088	7.97148	6.87964	7.85758
MB-7040	Positive	Negative	1	Luminal A	4+	non-HER2A		2	1.03693	10.615	11.3284	6.97799	7.27843
MB-7041	Positive	Positive	NA	Luminal A	3	non-HER2A		1	0.538229	9.88621	11.813	7.54285	8.53618
MB-7048	Positive	Negative	NA	HER2E	1	non-HER2A		4	1.09268	11.3815	9.8228	6.85699	8.37235
MB-7052	Negative	Negative	NA	Basal-like	9	non-HER2A	Negative	2	0.863325	9.50668	6.92562	6.77831	7.06734
MB-7053	Positive	Positive	NA	Luminal A	4+	non-HER2A		2	1.05393	10.682	9.41022	8.29198	8.16238
MB-7054	Positive	Positive	NA	Basal-like	10	non-HER2A		2	0.878599	10.5722	7.81705	7.04945	7.02095
MB-7055	Negative	Negative	NA	Basal-like	10	non-HER2A	Negative	2	0.806713	10.305	6.94231	6.89557	6.79714
MB-7056	Positive	Positive	NA	Luminal A	3	non-HER2A		2	1.0372	11.8576	10.7774	7.7437	8.45457
MB-7059	Negative	Negative	NA	HER2E	5	HER2A	Positive	11	3.63021	14.2063	7.17396	6.78116	8.61886
MB-7063	Positive	Positive	NA	Luminal A	3	non-HER2A		2	1.05393	9.93719	11.7574	7.38317	7.91098
MB-7065	Positive	Positive	NA	Luminal B	9	non-HER2A		2	1.03693	9.89278	12.2742	7.53054	8.4392
MB-7066	Negative	Negative	NA	HER2E	3	non-HER2A	Positive	2	1.02047	12.1036	7.39371	6.83694	8.82318
MB-7067	Negative	Negative	NA	HER2E	5	HER2A	Positive	9	3.13211	14.2063	6.97368	6.7194	7.37266
MB-7068	Positive	Negative	NA	HER2E	9	HER2A		12	4.41824	14.0777	8.77953	6.86246	7.96422
MB-7069	Positive	Negative	NA	HER2E	5	HER2A		5	2.47146	13.5092	7.21559	6.79068	9.83261
MB-7071	Positive	Positive	NA	HER2E	3	non-HER2A		2	1.02047	10.8073	8.91272	7.28154	7.17934
MB-7072	Positive	Positive	NA	Luminal B	1	non-HER2A		4	1.7828	11.2676	10.2274	7.38976	8.67423
MB-7073	Negative	Negative	NA	Basal-like	5	HER2A	Positive	8	3.12675	14.8758	6.92054	6.8188	7.87125
MB-7075	Positive	Negative	NA	Luminal B	1	non-HER2A		3	1.80035	11.8931	11.0715	6.76569	8.62928
MB-7076	Positive	Positive	NA	Luminal A	7	non-HER2A		2	1.05449	9.70655	11.8542	9.59336	9.00834
MB-7078	Negative	Negative	NA	Basal-like	10	non-HER2A	Negative	2	1.09382	7.24306	6.866	6.79562	7.12368
MB-7080	Positive	Positive	NA	Luminal A	8	non-HER2A		2	1.02047	10.6851	10.3535	7.96462	8.0747
MB-7086	Positive	Positive	NA	Luminal B	9	non-HER2A		2	1.02047	10.5293	12.3465	7.27389	7.82104
MB-7089	Negative	Negative	NA	Basal-like	10	non-HER2A	Negative	4	1.25456	10.628	7.34083	6.87987	6.90464
MB-7091	Positive	Positive	NA	Luminal A	7	non-HER2A		2	0.639245	10.3453	11.0795	7.07552	8.27437
MB-7094	Positive	Positive	NA	Luminal B	9	non-HER2A		2	1.11118	10.9858	11.4971	7.01719	8.90808
MB-7095	Positive	Negative	NA	Luminal A	8	non-HER2A		2	1.03693	11.1706	12.3465	6.82145	9.06237
MB-7097	Positive	Negative	NA	Luminal B	8	non-HER2A		4	1.25489	10.7923	11.8861	6.73911	8.89514
MB-7104	Positive	Negative	NA	Basal-like	6	non-HER2A		2	1.02047	9.35539	9.85856	6.79054	8.47884
MB-7106	Positive	Positive	NA	Luminal A	2	non-HER2A		2	1.05393	10.5307	10.2444	7.35727	8.17495
MB-7107	Positive	Negative	1	Luminal A	8	non-HER2A		3	1.04404	10.6295	12.2695	6.76945	9.40096
MB-7109	Positive	Positive	NA	Luminal B	2	non-HER2A		3	1.6941	10.4172	11.9073	7.52469	8.0466
MB-7111	Positive	Positive	NA	Basal-like	1	non-HER2A		2	0.988584	9.27741	9.12509	7.83619	7.87032
MB-7112	Positive	Positive	NA	Luminal B	2	non-HER2A		2	1.07646	9.66294	10.1217	7.4885	8.72896
MB-7113	Positive	Positive	NA	Luminal A	7	non-HER2A		2	1.05393	10.6867	11.1965	8.43492	7.77822
MB-7114	Negative	Negative	NA	Basal-like	10	non-HER2A	Negative	2	0.877249	8.95259	6.99587	6.82201	6.82306
MB-7115	NA	Negative	3	HER2E	5	HER2A		6	3.28063	14.2728	10.4474	6.6947	7.13082
MB-7116	Positive	Negative	NA	Luminal B	8	non-HER2A		2	1.07699	9.98571	10.575	6.90357	8.27513
MB-7118	NA	Positive	1	Luminal A	8	non-HER2A		2	1.03693	11.5993	12.5173	7.95815	7.65599
MB-7119	Negative	Negative	NA	Basal-like	10	non-HER2A	Negative	3	0.842751	9.79015	6.90531	6.76021	6.79733
MB-7121	Negative	Negative	NA	Basal-like	10	non-HER2A	Negative	2	1.0372	10.0715	7.08805	6.78766	7.72294
MB-7123	NA	Positive	1	Luminal A	1	non-HER2A		1	0.54691	10.1724	11.1265	7.37401	8.4986
MB-7124	NA	Positive	1	Luminal A	7	non-HER2A		2	1.1294	10.9466	11.141	9.46901	8.71026
MB-7131	Positive	Negative	NA	Luminal B	8	non-HER2A		2	1.11118	10.6789	12.5173	6.77375	9.46126
MB-7132	Positive	Positive	NA	Luminal B	7	non-HER2A		2	1.09382	10.198	11.8197	8.74027	8.21195
MB-7135	Negative	Negative	NA	HER2E	5	HER2A	Positive	6	3.22937	14.5997	7.36661	6.76431	9.18784
MB-7137	Positive	Negative	NA	Luminal A	4+	non-HER2A		2	1.07646	10.1304	10.9466	6.9263	7.86507
MB-7138	Positive	Positive	NA	Luminal B	8	non-HER2A		2	1.00453	9.67829	11.9473	9.63681	7.84299
MB-7140	Positive	Negative	NA	Luminal B	8	non-HER2A		2	1.05449	10.4746	12.2884	6.8197	8.6319
MB-7142	NA	Positive	1	Luminal B	2	non-HER2A		3	1.50641	11.5291	10.9282	7.00576	8.35105
MB-7143	Negative	Negative	NA	HER2E	5	HER2A	Positive	10	3.03839	13.9249	6.99008	6.76581	8.07503
MB-7144	Positive	Positive	NA	Luminal B	8	non-HER2A		2	1.26024	10.7514	11.5264	7.09585	7.82267
MB-7145	Negative	Negative	NA	Basal-like	10	non-HER2A	Negative	2	0.649392	9.17949	7.23889	6.82148	7.13071
MB-7147	Positive	Positive	NA	Luminal B	6	non-HER2A		2	0.833163	8.97311	11.2296	7.65357	7.97902
MB-7148	Positive	Positive	NA	Luminal A	NA	non-HER2A		2	1.09382	11.3475	12.4584	7.07871	8.43578
MB-7151	Positive	Negative	NA	Basal-like	10	non-HER2A		3	1.27057	12.2152	6.88132	6.85355	7.37855
MB-7153	Positive	Negative	NA	HER2E	8	non-HER2A		2	1.02047	11.2791	8.64949	6.80292	7.13105
MB-7155	Negative	Negative	NA	Basal-like	10	non-HER2A	Negative	3	0.896875	9.08635	6.90397	6.82218	7.02982
MB-7157	Positive	Positive	1	Luminal B	8	non-HER2A		4	1.29878	11.1368	11.5766	8.48735	8.25391
MB-7158	Negative	Negative	NA	Basal-like	4-	non-HER2A	Negative	2	1.05449	10.6369	7.16907	6.76854	6.92815
MB-7161	Positive	Positive	NA	Luminal A	6	non-HER2A		3	1.75011	11.0694	10.3062	7.05594	8.07656
MB-7162	Positive	Positive	NA	Luminal A	3	non-HER2A		2	1.05393	10.5722	11.5131	8.23264	8.72165
MB-7163	Negative	Positive	NA	Luminal A	3	non-HER2A	Positive	2	1.0599	11.0438	9.80092	7.45706	8.49978
MB-7164	Positive	Positive	NA	Luminal A	3	non-HER2A		2	1.09382	11.2977	9.96539	7.27352	8.43179
MB-7167	Positive	Positive	NA	HER2E	8	non-HER2A		2	0.988584	10.4436	9.70582	8.20691	8.18792
MB-7168	Positive	Positive	NA	Luminal A	7	non-HER2A		4	1.15787	10.2541	10.8223	7.0903	7.91349
MB-7170	Positive	Negative	NA	Luminal A	4+	non-HER2A		2	1.09382	11.6372	11.3595	6.81953	6.8925
MB-7172	Positive	Positive	NA	Luminal B	8	non-HER2A		2	1.14761	10.1714	11.5264	10.0583	8.63718
MB-7174	NA	Negative	1	Luminal B	6	non-HER2A		2	1.02047	9.8048	12.0233	6.85435	6.89124
MB-7176	Positive	Positive	NA	Luminal A	8	non-HER2A		2	1.02047	10.2295	9.85134	8.47708	8.46777
MB-7181	Positive	Negative	NA	Luminal B	1	non-HER2A		6	1.91725	12.3417	11.6107	6.85367	6.83862
MB-7185	Positive	Positive	NA	Luminal A	8	non-HER2A		2	1.00453	11.6078	11.9325	7.34343	8.26784
MB-7186	Positive	Positive	1	Luminal B	7	non-HER2A		4	1.14179	10.2149	11.6107	8.00722	8.48924
MB-7188	Positive	Positive	1	Luminal B	NA	non-HER2A		2	1.07646	11.3891	12.4744	7.42681	8.62732
MB-7193	Positive	Positive	NA	Luminal B	6	non-HER2A		3	1.85938	10.2106	11.8401	7.36897	8.0805
MB-7194	Positive	Negative	NA	Luminal B	2	non-HER2A		2	1.1294	10.9802	12.7425	6.78812	8.08912
MB-7195	Positive	Positive	1	Luminal A	8	non-HER2A		4	1.17655	10.9896	11.4552	8.70921	9.18636
MB-7196	Positive	Positive	NA	HER2E	9	non-HER2A		2	0.891398	10.472	12.3513	7.61684	9.45523
MB-7197	Positive	Positive	NA	Luminal B	8	non-HER2A		2	0.863542	11.0855	12.3758	7.0004	8.88917
MB-7199	Positive	Negative	1	Luminal B	8	non-HER2A		4	1.17655	7.58816	12.3369	6.85851	8.27174
MB-7200	Positive	Positive	1	Luminal B	8	non-HER2A		2	1.07699	10.7449	11.9772	7.48131	8.96934
MB-7201	Positive	Positive	NA	Basal-like	3	non-HER2A		2	1.05449	9.11949	7.74668	6.94894	7.80184
MB-7205	Negative	Negative	1	Basal-like	10	non-HER2A	Negative	2	0.74524	9.93889	6.96496	6.79963	6.97182
MB-7207	Negative	Negative	NA	HER2E	1	HER2A	Positive	4	2.07387	14.3619	7.15112	6.82521	7.94276
MB-7215	Positive	Negative	1	Luminal A	4+	non-HER2A		4	1.10583	10.0897	9.18784	6.94755	7.99406
MB-7216	Positive	Positive	NA	Luminal B	4+	non-HER2A		2	1.07699	9.56854	12.6257	8.60908	9.02694
MB-7219	Positive	Positive	NA	Luminal A	8	non-HER2A		2	1.11118	10.3131	10.1786	7.2245	8.03153
MB-7220	Positive	Positive	NA	Luminal B	8	non-HER2A		2	1.0372	10.8157	9.69551	7.87041	7.83087
MB-7229	Positive	Positive	NA	Luminal A	8	non-HER2A		2	0.988584	10.6135	12.2284	8.74603	9.21103
MB-7231	Positive	Positive	3	Luminal A	4+	non-HER2A		2	1.07699	10.5806	11.6638	7.75032	9.08407
MB-7232	Positive	Positive	NA	Luminal A	8	non-HER2A		4	1.12367	10.6237	12.2603	8.8194	9.15529
MB-7234	Positive	Negative	NA	Luminal B	6	non-HER2A		2	1.09382	11.3165	12.1288	6.91333	9.33832
MB-7235	Positive	Positive	1	Luminal A	8	non-HER2A		3	1.07004	11.3815	12.0708	7.05547	8.43803
MB-7238	Positive	Negative	NA	HER2E	8	non-HER2A		2	0.806916	10.4037	9.63081	6.80246	8.32702
MB-7241	Positive	Positive	1	Luminal B	7	non-HER2A		2	1.09354	10.1991	10.3891	8.31524	8.38674
MB-7243	Positive	Negative	NA	Luminal A	8	non-HER2A		2	1.02047	10.8207	12.3859	6.97231	8.66982
MB-7244	Positive	Positive	1	Luminal A	8	non-HER2A		2	1.00453	10.3337	10.4087	8.63515	7.4493
MB-7250	Negative	Negative	3	HER2E	5	HER2A	Positive	6	2.34567	13.3423	7.179	6.80899	8.55652
MB-7251	Positive	Negative	NA	HER2E	5	HER2A		8	2.59757	14.6688	7.3789	6.75823	7.98518
MB-7252	Positive	Negative	1	HER2E	4-	non-HER2A		2	1.05393	12.0588	7.79796	6.69429	6.93901
MB-7253	Positive	Negative	1	Luminal B	3	non-HER2A		2	1.1294	10.5079	11.6313	6.77058	8.51774
MB-7254	Positive	Positive	1	Luminal A	8	non-HER2A		3	1.12267	10.5778	11.143	7.19122	8.9067
MB-7256	Negative	Negative	3	HER2E	5	HER2A	Positive	11	5.27408	14.6446	7.26249	6.82207	8.89058
MB-7258	Negative	Negative	1	Basal-like	10	non-HER2A	Negative	2	0.832946	10.336	6.81176	6.77204	7.83417
MB-7263	Positive	Positive	NA	Luminal B	9	non-HER2A		2	1.07646	10.5905	11.8097	7.92563	7.71333
MB-7266	Positive	Positive	1	Luminal B	9	non-HER2A		2	1.09354	10.3108	11.8682	7.21461	7.47877
MB-7267	Negative	Negative	NA	Basal-like	10	non-HER2A	Negative	2	0.781688	9.50792	6.90867	6.89643	6.89881
MB-7269	Negative	Negative	NA	Basal-like	10	non-HER2A	Negative	7	1.99865	11.5291	7.68934	6.75725	6.81324
MB-7275	Negative	Positive	3	HER2E	5	HER2A	Negative	7	3.3021	13.465	8.04768	7.57782	7.84577
MB-7276	Positive	Positive	1	Luminal A	8	non-HER2A		2	1.07699	10.6867	12.704	8.14462	9.01523
MB-7277	Positive	Positive	3	Luminal A	8	non-HER2A		2	0.988584	9.96888	10.6835	8.55062	7.92799
MB-7278	Positive	Positive	1	Luminal A	3	non-HER2A		2	1.07646	10.3723	11.6518	7.82905	9.43816
MB-7279	Positive	Positive	NA	HER2E	9	HER2A		5	2.19312	12.6317	9.55888	7.32813	7.88072
MB-7280	Positive	Positive	1	Luminal A	7	non-HER2A		2	1.09382	10.7823	11.0012	7.24044	8.4727
MB-7281	Positive	Negative	NA	HER2E	5	non-HER2A		3	1.5809	12.6856	7.1379	6.7707	8.74923
MB-7283	Positive	Negative	1	Luminal B	6	non-HER2A		1	0.564552	10.969	11.5024	6.78507	8.76855
MB-7284	Positive	Negative	NA	Luminal A	6	non-HER2A		2	1.07699	11.1556	11.568	6.79858	7.60532
MB-7285	Positive	Positive	1	Luminal B	6	non-HER2A		4	1.51452	10.4025	9.85615	7.03934	7.58006
MB-7286	Positive	Negative	1	Luminal B	3	non-HER2A		2	1.0599	10.5199	11.7163	6.86199	8.12375
MB-7288	Positive	Negative	NA	Luminal B	8	non-HER2A		2	1.09382	10.9337	9.88371	6.8392	7.93387
MB-7291	Positive	Negative	NA	HER2E	1	non-HER2A		3.74603	1.9427	12.6613	7.12112	6.77155	7.19722
MB-7292	Positive	Positive	NA	Luminal B	6	non-HER2A		3	1.6941	10.2684	9.59995	7.59291	7.11369
MB-7293	Positive	Positive	1	Luminal A	3	non-HER2A		4	1.14209	10.2477	10.8498	7.31482	7.58303
MB-7294	Positive	Positive	NA	Luminal B	1	non-HER2A		6	1.85197	10.8793	11.2054	7.86507	8.22359
MB-7296	Positive	Negative	NA	Luminal B	5	HER2A		8	2.98244	14.1575	9.78859	6.87243	8.03354

## Sheet: USO1062
Clinical metadata, subtype information, HER2A status, HER2 copy number, and expression levels of ERBB2, ER, PR and AR for USO1062 tumors
Tumor	ER IHC	PR IHC	HER2 IHC	PAM50 subtype	HER2A status	HER2 copy number	ERBB2 expression (normalized log10 counts)	ER expression (normalized log10 counts)	PR expression (normalized log10 counts)	AR expression (normalized log10 counts)
HP-50792	Positive	Negative	Negative	Luminal A	non-HER2A	1.189	0.137358	0.223544	-0.697274	-0.0952145
HP-50793	Negative	Negative	Positive	HER2E	non-HER2A	1.784	0.217443	-1.24645	-1.40135	-0.401352
HP-50794	Positive	Positive	Negative	Luminal A	non-HER2A	1.609	0.270497	0.537654	0.310744	-0.124985
HP-50795	Positive	Positive	Negative	Luminal A	non-HER2A	2.558	0.37207	0.530763	-0.0303554	0.278862
HP-50796	Positive	Positive	Negative	Luminal A	non-HER2A	1.937	0.429469	0.459472	-1.14203	0.271656
HP-50797	Positive	Positive	Negative	Luminal A	non-HER2A	1.518	0.231399	0.750983	-0.0264061	0.233916
HP-50798	Positive	Positive	Negative	Luminal A	non-HER2A	1.689	0.415948	0.772086	0.0663128	-0.513471
HP-50799	Positive	Positive	Negative	Luminal A	non-HER2A	3.508	0.603221	0.454753	-0.936547	-0.171059
HP-50801	Positive	Negative	Negative	Luminal A	non-HER2A	1.947	0.635831	0.806528	0.0495657	0.265166
HP-50802	Negative	Negative	Negative	Basal-like	non-HER2A	2.194	0.0453841	-1.36539	-1.76333	-1.58724
HP-50806	Negative	Negative	Negative	Basal-like	non-HER2A	1.543	0.123945	-0.783301	-1.05215	-0.818063
HP-50809	Positive	Positive	Negative	Luminal A	non-HER2A	1.384	0.214273	0.591691	-0.2007	0.10033
HP-50810	Positive	Positive	Negative	HER2E	non-HER2A	1.424	0.177335	-1.03176	-1.46541	-0.137324
HP-50811	Negative	Negative	Negative	Basal-like	non-HER2A	1.708	-0.0721811	-1.20572	-1.7286	-0.682841
HP-50813	Negative	Negative	Negative	Basal-like	non-HER2A	1.286	0.0385315	-1.48781	-1.58472	-1.16559
HP-50815	Negative	Negative	Negative	Basal-like	non-HER2A	1.914	0.18428	-1.41145	-1.73596	-1.32847
HP-50817	Negative	Negative	Negative	HER2E	non-HER2A	2.31	0.0805122	-1.3001	-1.59159	-0.374674
HP-50818	Negative	Negative	Negative	HER2E	non-HER2A	1.676	0.295033	-1.41083	-1.58692	0.0585
HP-50820	Negative	Negative	Negative	HER2E	non-HER2A	1.795	0.267951	-1.12248	-1.06449	0.466992
HP-50821	Positive	Positive	Negative	Luminal A	non-HER2A	1.455	0.356817	0.498398	0.442732	-0.01267
HP-50824	Negative	Negative	Negative	Basal-like	non-HER2A	2.648	-0.222615	-1.50028	-1.67637	-1.31735
HP-50825	Positive	Positive	Negative	Luminal A	non-HER2A	1.561	0.779351	0.420177	0.527692	0.0940363
HP-50826	Negative	Negative	Negative	Basal-like	non-HER2A	1.726	0.139535	-0.848883	-1.34949	-0.897187
HP-50828	Positive	Positive	Negative	Luminal A	non-HER2A	1.726	0.352332	0.389873	-0.848827	0.225608
HP-50829	Positive	Positive	Positive	Luminal A	non-HER2A	1.864	0.481195	-0.130286	0.247378	0.421335
HP-50831	Positive	Positive	Positive	Luminal A	HER2A	16.72	1.2887	0.032181	0.074793	-0.191163
HP-50832	Negative	Negative	Negative	Basal-like	non-HER2A	1.628	-0.10338	-1.52324	-1.75369	-1.43147
HP-50834	Positive	Positive	Negative	Luminal A	non-HER2A	1.606	0.384317	0.529393	0.12401	0.164915
HP-50835	Positive	Positive	Negative	Luminal A	non-HER2A	2.798	0.684772	-0.346014	-0.653263	-0.573386
HP-50836	Positive	Positive	Negative	Luminal A	non-HER2A	0.973	0.317799	-0.226437	0.126396	0.206787
HP-50837	Negative	Negative	Positive	HER2E	HER2A	9.606	1.4288	-1.32586	-1.62689	0.0481418
HP-50838	Positive	Positive	Negative	Luminal A	non-HER2A	1.537	0.128603	0.224367	0.609119	-0.199421
HP-50840	Positive	Positive	Negative	Luminal A	non-HER2A	2.013	0.230851	0.403805	-0.983297	-0.28785
HP-50841	Positive	Positive	Negative	Luminal A	non-HER2A	1.2	0.223187	0.28401	-0.127465	-0.0472072
HP-51130	Positive	Negative	Negative	Luminal A	non-HER2A	1.756	0.093247	0.426462	-0.117606	0.258057
HP-51132	Positive	Positive	Negative	Luminal A	non-HER2A	1.545	0.324978	0.556985	0.0543535	-0.459854
HP-51133	Negative	Negative	Positive	Basal-like	non-HER2A	2.161	0.446626	-1.63712	-1.63712	-0.808886
HP-51134	Negative	Negative	Negative	Basal-like	non-HER2A	1.529	0.153225	-1.65801	-1.65801	-1.41498
HP-51136	Positive	Positive	Negative	Luminal A	non-HER2A	2.087	0.189056	0.373581	-0.0413927	-0.0871502
HP-51140	Positive	Positive	Negative	Luminal A	non-HER2A	2.237	0.308426	0.463878	-0.112079	-0.0577218
HP-51141	Positive	Positive	Positive	Luminal B	non-HER2A	2.144	0.343356	0.586487	-0.758943	-0.44564
HP-51142	Positive	Negative	Negative	Luminal B	non-HER2A	1.778	-0.303365	-0.24937	-0.865248	-0.270741
HP-51145	Negative	Negative	Negative	Basal-like	non-HER2A	1.499	-0.37866	-1.0347	-1.36206	-1.18597
HP-51147	Negative	Negative	Negative	Basal-like	non-HER2A	1.848	-0.2979	-1.19277	-1.37986	-0.902735
HP-51148	Positive	Negative	Negative	Basal-like	non-HER2A	1.546	0.319029	-1.11943	-1.22857	-0.731245
HP-51151	Negative	Negative	Negative	Basal-like	non-HER2A	1.435	0.417543	-0.795532	-0.795532	-0.211956
HP-51152	Positive	Negative	Positive	Luminal A	HER2A	6.908	1.40735	0.426523	-1.09199	0.335333
HP-51153	Negative	Negative	Negative	Basal-like	non-HER2A	1.865	-0.273213	-1.4493	-1.52185	-1.00695
HP-51156	Positive	Positive	Negative	Luminal A	non-HER2A	1.798	0.245125	-0.405874	-0.154403	0.115298
HP-51157	Positive	Positive	Negative	Luminal A	non-HER2A	1.603	0.618772	0.645101	0.123167	0.428892
HP-51159	Positive	Positive	Negative	Luminal B	non-HER2A	2.385	0.395202	0.395752	-1.16	-0.266897
HP-51163	Positive	Negative	Negative	Luminal B	non-HER2A	1.508	0.325566	0.758503	-1.37123	0.0611404
HP-51166	Positive	Negative	Negative	Luminal B	non-HER2A	2.028	0.191113	0.117307	-1.42114	0.0283376
HP-51167	Positive	Positive	Negative	Luminal A	non-HER2A	1.886	0.506797	0.739384	0.288213	0.198184
HP-51168	Positive	Negative	Negative	Luminal B	non-HER2A	2.072	0.596961	0.421766	-1.61076	-0.251139
HP-51169	Negative	Negative	Negative	Basal-like	non-HER2A	1.939	-0.0135506	-1.17772	-1.83777	-1.05962
HP-51170	Positive	Positive	Negative	Luminal A	non-HER2A	2.218	0.286633	0.329932	-0.116593	0.13273
HP-51172	Positive	Positive	Negative	Luminal A	non-HER2A	1.841	0.556507	0.418596	0.292219	0.418596
HP-51176	Negative	Negative	Negative	Basal-like	non-HER2A	2.084	0.20669	-0.926849	-1.1487	-0.6964
HP-51179	Negative	Negative	Negative	Basal-like	non-HER2A	1.242	0.389597	-0.987588	-1.16368	-0.862649
HP-51180	Positive	Positive	Negative	Luminal A	non-HER2A	1.456	0.285456	0.682136	0.602247	-0.0401752
HP-51182	Positive	Positive	Negative	Luminal B	non-HER2A	1.684	0.0021871	-0.203795	-0.617602	-0.421766
HP-51290	Positive	Positive	Negative	Luminal A	non-HER2A	2.162	0.777765	0.50437	0.524083	0.109376
HP-51291	Negative	Negative	Negative	Basal-like	non-HER2A	1.591	-0.32814	-1.85426	-1.75735	-1.51847
HP-51292	Negative	Negative	Negative	Basal-like	non-HER2A	2.225	-0.14098	-0.963381	-1.92631	-1.66667
HP-51294	Positive	Positive	Negative	Luminal A	non-HER2A	1.867	0.596863	1.0754	0.151744	0.269504
HP-51295	Positive	Positive	Negative	Luminal A	non-HER2A	1.881	-0.00388583	0.413496	-0.290941	-0.100609
HP-51296	Negative	Negative	Positive	Basal-like	non-HER2A	4.392	1.51538	-0.959178	-1.48206	-1.35712
HP-51298	Positive	Negative	Negative	Luminal A	non-HER2A	1.831	-0.243038	-0.0321847	-0.669007	-0.30103
HP-51299	Positive	Positive	Negative	Luminal A	non-HER2A	2.471	0.439179	0.651482	0.0435927	-0.20239
HP-51300	Negative	Negative	Negative	Basal-like	non-HER2A	1.407	-0.102198	-1.44363	-1.44363	-1.36445
HP-51301	Negative	Negative	Negative	Basal-like	non-HER2A	2.136	-0.219995	-1.65223	-2.04434	-1.80546
HP-51303	Positive	Positive	Negative	Luminal A	non-HER2A	1.141	-0.265682	0.107177	-0.387508	-0.100667
HP-51305	Positive	Positive	Negative	Luminal A	non-HER2A	1.268	-0.120123	0.0810351	-1.20859	-0.0110511
HP-51307	Positive	Positive	Negative	Luminal A	non-HER2A	1.715	0.327044	0.43502	-0.444158	0.0596976
HP-51308	Negative	Negative	Negative	Basal-like	non-HER2A	1.368	-0.128323	-1.82264	-1.8526	-1.28272
HP-51311	Positive	Positive	Negative	Luminal A	non-HER2A	2.497	0.301389	0.116094	0.144776	-0.0483814
HP-51313	Positive	Negative	Negative	Luminal B	non-HER2A	1.818	-0.00150153	0.448358	-1.4239	-0.445388
HP-51314	Negative	Negative	Negative	Basal-like	non-HER2A	2.013	-0.196625	-1.55292	-1.49493	-1.30111
HP-51319	Negative	Negative	Negative	Basal-like	non-HER2A	2.114	-0.164317	-1.81928	-1.81928	-1.63022
HP-51321	Positive	Negative	Negative	Luminal B	non-HER2A	1.683	-0.356323	-0.538597	-1.50708	-0.761485
HP-51322	Negative	Negative	Negative	Basal-like	non-HER2A	1.952	0.40233	-0.957031	-1.25806	-0.746178
HP-51324	Negative	Negative	Negative	HER2E	non-HER2A	1.31	-0.386106	-1.72853	-1.72853	-1.66158
HP-51325	Positive	Positive	Negative	Luminal A	non-HER2A	1.319	0.180751	0.498133	0.355006	0.0346916
HP-51326	Negative	Negative	Positive	Basal-like	non-HER2A	2.898	-0.26031	-1.05162	-1.84556	-1.02407
HP-51327	Positive	Positive	Positive	Luminal A	HER2A	26.4	1.52178	-0.157197	-0.157197	-0.157197
HP-51328	Positive	Positive	Negative	Luminal A	non-HER2A	1.921	0.235	0.275214	0.74229	-0.141487
HP-51329	Positive	Positive	Negative	Luminal A	non-HER2A	1.502	-0.00473506	0.0518856	-0.117157	0.025609
HP-51330	Positive	Positive	Negative	Luminal A	non-HER2A	1.839	0.112655	-0.146779	-0.0549843	-0.0115382
HP-51331	Negative	Negative	Negative	Basal-like	non-HER2A	2.017	-0.0883054	-1.15018	-1.87718	-0.462207
HP-51332	Negative	Negative	Negative	Basal-like	non-HER2A	1.573	-0.144676	-0.706118	-1.565	-1.06959
HP-51334	Positive	Negative	Negative	Luminal A	non-HER2A	1.44	0.206266	0.440801	-0.282213	-0.0281794
HP-51335	Negative	Negative	Negative	Basal-like	non-HER2A	2.945	-0.677579	-2.14933	-2.31414	-1.93673
HP-51336	Positive	Positive	Negative	Luminal A	non-HER2A	1.578	0.322102	0.276013	0.236188	0.160041
HP-51337	Positive	Positive	Negative	Luminal A	non-HER2A	1.9	0.410878	0.350442	-0.178948	-0.0250269
HP-51410	Negative	Negative	Negative	Basal-like	non-HER2A	1.31	-0.178514	-1.57136	-1.72112	-1.47445
HP-51411	Positive	Positive	Negative	Luminal A	non-HER2A	1.884	0.659803	0.367067	0.133374	0.271933
HP-51412	Negative	Positive	Positive	HER2E	HER2A	8.513	0.975533	-0.786525	-0.307606	-0.551542
HP-51413	Positive	Positive	Negative	Luminal B	non-HER2A	1.567	0.59342	0.532178	0.584875	0.216281
HP-51414	Positive	Positive	Negative	Luminal A	non-HER2A	1.88	0.25624	0.186604	0.00096725	-0.0611807
HP-51415	Negative	Negative	Negative	Basal-like	non-HER2A	1.81	-0.0778841	-1.57273	-1.39664	-1.22055
HP-51416	Positive	Positive	Negative	Luminal A	non-HER2A	2.06	0.178274	0.14831	0.116126	0.178274
HP-51417	Positive	Negative	Negative	Luminal A	non-HER2A	1.516	0.387026	0.563117	0.301866	0.107547
HP-51418	Negative	Negative	Negative	Basal-like	non-HER2A	1.183	0.0584585	-1.34686	-1.23772	-0.961513
HP-51422	Negative	Negative	Negative	Luminal A	non-HER2A	1.546	0.319431	-0.629416	-0.830331	0.0759406
HP-51423	Negative	Negative	Negative	Basal-like	non-HER2A	2.426	-0.0844215	-1.39895	-1.89956	-1.17256
HP-51424	Negative	Negative	Negative	Basal-like	non-HER2A	2.114	-0.333353	-1.41597	-1.8351	-1.43716
HP-51426	Positive	Positive	Negative	Luminal A	non-HER2A	2.89	0.683463	0.424836	0.189308	0.275668
HP-51427	Positive	Positive	Negative	Luminal A	non-HER2A	2.498	0.430567	0.588486	0.548476	0.163992
HP-51431	Negative	Negative	Negative	Basal-like	non-HER2A	1.667	0.0209988	-1.19856	-1.73695	-1.12513
HP-51438	Negative	Negative	Negative	Basal-like	non-HER2A	1.364	-0.0807838	-0.700573	-1.17769	-0.751725
HP-51440	Negative	Negative	Negative	Basal-like	non-HER2A	1.175	-0.27406	-2.14476	-2.00645	-0.889484
HP-51441	Positive	Negative	Negative	Luminal B	non-HER2A	1.445	0.216555	0.0153734	-1.19055	-0.884724
HP-51442	Negative	Negative	Negative	Basal-like	non-HER2A	1.274	-0.0357245	-1.052	-1.79236	-1.37739
HP-51444	Positive	Positive	Negative	Luminal B	non-HER2A	2.062	-0.360297	0.307145	-0.306491	-0.22685
HP-51447	Negative	Negative	Negative	Luminal A	non-HER2A	1.971	0.562278	-0.736939	-1.03797	-0.69743
HP-51448	Positive	Positive	Negative	Luminal B	non-HER2A	2.684	-0.0563852	0.0167411	-0.997883	-1.20799
HP-51450	Negative	Negative	Negative	Basal-like	non-HER2A	1.656	-0.586425	-0.819436	-1.96814	-1.12304
HP-51455	Negative	Negative	Negative	HER2E	non-HER2A	1.922	0.28899	-1.49545	-1.46912	-0.182373
HP-51458	Negative	Negative	Positive	HER2E	HER2A	11.089	1.50154	-1.78981	-1.87413	-0.723591
HP-51461	Negative	Negative	Negative	Basal-like	non-HER2A	1.814	-0.488067	-1.73946	-2.1374	-1.37397
HP-51462	Positive	Positive	Negative	Luminal A	non-HER2A	1.73	0.113428	0.295578	0.157686	0.0912395
HP-51463	Negative	Negative	Negative	Basal-like	non-HER2A	1.536	-0.466013	-1.54691	-1.32507	-1.40674
HP-51464	Negative	Negative	Negative	Basal-like	non-HER2A	1.864	-0.249006	-1.27984	-1.6819	-1.27172
HP-51465	Negative	Negative	Negative	Basal-like	non-HER2A	1.423	-0.245617	-1.56216	-1.71894	-1.45742
HP-51466	Positive	Positive	Negative	Luminal A	non-HER2A	1.536	0.17332	-0.0948371	-0.0248151	-0.0178964
HP-51467	Positive	Positive	Positive	Luminal B	HER2A	5.981	0.766741	-0.545361	-1.05458	-0.802302
HP-51725	Positive	Negative	Negative	Luminal A	non-HER2A	2.018	0.461604	0.338449	-0.844821	-0.0489409
HP-51731	Positive	Positive	Positive	Luminal A	HER2A	5.206	0.802887	-0.368109	-1.07465	-0.623757
HP-51732	Positive	Positive	Negative	Luminal A	non-HER2A	1.519	0.0257461	-0.0701461	-1.11722	-0.98759
HP-51733	Negative	Negative	Negative	Basal-like	non-HER2A	1.817	-0.0614202	-1.64775	-1.7405	-0.700993
HP-51734	Negative	Negative	Negative	Basal-like	non-HER2A	1.913	0.062459	-1.62729	-2.22935	-1.5859
HP-51736	Positive	Positive	Negative	Luminal A	non-HER2A	1.569	0.780614	1.0901	0.185812	0.54931
HP-51741	Positive	Positive	Negative	Luminal A	non-HER2A	1.69	0.462801	0.563015	0.419222	0.134519
HP-51742	Positive	Positive	Negative	Luminal B	HER2A	28.182	1.71331	-0.154082	-0.720552	-0.26297
HP-51743	Negative	Negative	Negative	Basal-like	non-HER2A	1.537	-0.0566801	-1.27804	-1.78687	-1.4391
HP-51744	Positive	Negative	Positive	Luminal B	HER2A	9.872	1.73244	-0.161092	-1.78045	-0.0654882
HP-51745	Positive	Positive	Positive	Luminal B	HER2A	10.478	0.834902	-0.303582	-0.647903	-0.378334
HP-51746	Positive	Negative	Positive	Luminal B	non-HER2A	2.923	0.779588	0.339964	-1.91691	-0.074582
HP-51750	Negative	Negative	Negative	HER2E	non-HER2A	2.182	0.338309	-1.16115	-1.19894	-0.503934
HP-51751	Negative	Negative	Positive	HER2E	HER2A	14.312	1.58575	-1.47463	-1.75863	-0.422325
HP-51752	Positive	Negative	Negative	Luminal B	non-HER2A	2.116	0.506291	0.514157	-0.71518	-0.17928
HP-51753	Negative	Negative	Negative	Basal-like	non-HER2A	1.627	0.448202	-1.51052	-1.57267	-1.20949
HP-51755	Negative	Negative	Positive	Basal-like	HER2A	6.971	1.45604	-1.24762	-1.1633	-1.18963
HP-51756	Positive	Positive	Negative	Luminal A	non-HER2A	1.993	0.509544	0.0573431	0.0540278	0.175206
HP-51761	Negative	Negative	Positive	Basal-like	non-HER2A	2.508	0.641224	-1.54724	-1.54724	-0.510253
HP-51762	Positive	Positive	Positive	Luminal B	HER2A	7.798	1.465	0.199141	-0.328714	0.0656599
HP-51763	Negative	Negative	Negative	Basal-like	non-HER2A	1.295	0.315307	-1.68252	-1.68252	-0.720305
HP-51764	Positive	Positive	Negative	Luminal A	non-HER2A	2.002	0.344617	0.786023	-0.665291	-0.0336391
HP-51767	Positive	Negative	Negative	Luminal A	non-HER2A	2.119	0.206777	0.56877	-1.64652	-0.0648312
HP-51770	Positive	Negative	Negative	Luminal A	non-HER2A	1.901	0.194986	0.908196	-0.282136	0.240743
HP-51771	Negative	Negative	Negative	Basal-like	non-HER2A	1.245	-0.0879595	-1.24933	-1.24933	-0.897145
HP-51772	Positive	Positive	Negative	Luminal B	non-HER2A	1.709	0.100148	0.672123	0.3576	0.156963
HP-51780	Negative	Negative	Negative	Basal-like	non-HER2A	1.909	-0.27817	-1.77581	-2.18799	-1.92475
HP-51781	Negative	Negative	Negative	Basal-like	non-HER2A	1.677	-0.423946	-1.65059	-1.96801	-1.72023
HP-51782	Positive	Negative	Negative	Luminal A	non-HER2A	1.194	0.183501	0.0972193	-0.434186	-0.103027
HP-51783	Positive	Positive	Negative	Luminal A	non-HER2A	1.697	0.543051	0.565265	0.275364	0.270713
HP-51784	Negative	Negative	Negative	Basal-like	non-HER2A	1.63	-0.358387	-1.53494	-2.00512	-2.15125
HP-51841	Positive	Positive	Negative	Luminal A	non-HER2A	1.784	0.283031	0.10694	0.0277587	0.0691513
HP-51842	Positive	Positive	Negative	Luminal B	non-HER2A	1.585	0.188888	0.52468	-0.233384	0.126098
HP-51852	Negative	Negative	Positive	Basal-like	HER2A	11.104	1.03496	-1.04818	-1.79723	-1.82205
HP-51856	Positive	Positive	Negative	Luminal A	HER2A	5.211	0.730449	-0.0740313	-0.132023	-0.19897
HP-51861	Negative	Negative	Negative	Basal-like	non-HER2A	1.556	-0.452144	-1.65315	-1.48121	-1.48121
HP-51863	Negative	Negative	Negative	HER2E	non-HER2A	1.975	-0.036131	-1.62955	-1.67094	-0.744945
HP-51865	Positive	Positive	Negative	Luminal A	non-HER2A	2.128	0.427947	0.409464	-0.700452	-0.259543
HP-51867	Positive	Positive	Negative	Luminal A	non-HER2A	2.838	0.395876	0.519175	0.0592346	0.240038
HP-51868	Negative	Negative	Positive	HER2E	HER2A	5.573	1.00916	-1.78189	-2.08292	-0.386124
HP-51870	Positive	Positive	Negative	Luminal A	non-HER2A	2.527	0.582798	0.453485	0.227525	0.338279
HP-51871	Negative	Negative	Negative	Basal-like	non-HER2A	1.472	0.299917	-1.23664	-1.2824	-0.981369
HP-51874	Positive	Positive	Negative	Luminal B	non-HER2A	2.074	0.0288239	0.00124659	-0.550508	-0.681199
HP-51880	Negative	Negative	Negative	Luminal A	HER2A	7.72	1.17564	-0.296279	-0.656287	-0.324768
HP-51881	Positive	Negative	Negative	Luminal A	non-HER2A	1.639	0.363499	0.238561	-0.0624694	0.414652
HP-51882	Negative	Negative	Negative	Basal-like	non-HER2A	1.812	-0.303518	-1.49921	-1.95994	-1.63542
HP-51883	Positive	Positive	Negative	Luminal A	non-HER2A	1.734	0.5211	0.748898	0.878246	0.155612
HP-51886	Negative	Negative	Negative	Basal-like	non-HER2A	1.758	-0.331119	-1.26581	-1.94869	-1.68905
HP-51889	Negative	Negative	Negative	Basal-like	non-HER2A	1.633	0.0207748	-1.11215	-1.17214	-1.20557
HP-51891	Negative	Negative	Negative	Basal-like	non-HER2A	1.885	-0.0360656	-1.30199	-1.18169	-1.10485
HP-51892	Negative	Negative	Negative	Basal-like	non-HER2A	1.555	-0.174407	-1.82808	-1.94618	-1.16803
HP-51898	Negative	Negative	Negative	Basal-like	non-HER2A	1.889	-0.298092	-2.04944	-1.81208	-1.68429
HP-51899	Negative	Negative	Positive	Basal-like	non-HER2A	1.557	0.0271905	-1.9222	-2.0569	-0.29964
HP-52292	Positive	Positive	Negative	Luminal A	non-HER2A	1.669	0.317194	1.08827	0.236431	0.448015
HP-52293	Positive	Positive	Negative	Luminal B	non-HER2A	1.222	0.0590318	0.274534	-0.439166	-0.0724931
HP-52296	Negative	Negative	Positive	Luminal A	non-HER2A	1.511	0.577451	-0.422549	-0.59864	0.121519
HP-52298	Negative	Negative	Positive	HER2E	HER2A	12.167	1.62678	-1.17287	-1.8148	-0.217785
HP-52301	Positive	Negative	Negative	Luminal A	non-HER2A	1.491	0.620145	0.00736163	-0.390578	0.0353904
HP-52304	Positive	Positive	Positive	Luminal B	HER2A	11.494	1.49369	-0.368324	-0.172029	-0.358882
HP-52311	Positive	Positive	Negative	Luminal A	non-HER2A	1.991	0.412643	0.0127332	-0.577641	-0.323223
HP-52314	Positive	Positive	Negative	Luminal A	non-HER2A	2.023	0.511883	0.726999	-0.124939	0.124939
HP-52316	Negative	Negative	Negative	Basal-like	non-HER2A	1.255	0.167991	-1.60409	-1.26829	-1.34084
HP-52321	Positive	Positive	Negative	Luminal A	non-HER2A	2.086	0.406592	0.16626	-0.274649	0.140325
HP-52323	Positive	Positive	Negative	Luminal A	non-HER2A	1.806	0.438881	0.766268	-0.109461	0.178857
HP-52324	Negative	Negative	Negative	Basal-like	non-HER2A	1.563	-0.0644116	-0.712229	-0.967502	-0.58729
HP-52326	Positive	Positive	Negative	Luminal A	non-HER2A	1.672	0.503986	0.865014	0.692678	0.481123
HP-52327	Positive	Positive	Negative	Luminal B	non-HER2A	1.718	0.101993	-0.00164705	-0.631955	0.0259028
HP-52328	Positive	Positive	Negative	Luminal B	non-HER2A	1.79	0.185125	0.359777	0.0767495	0.0230829
HP-52329	Positive	Positive	Negative	Luminal A	non-HER2A	1.737	0.327341	0.618766	0.199376	0.161311
HP-52452	Positive	Positive	Negative	Luminal A	non-HER2A	1.963	0.503631	0.58764	0.0291499	0.275559
HP-52454	Negative	Negative	Negative	Basal-like	non-HER2A	2.158	-0.0590191	-1.35568	-1.41783	-0.940711
HP-52455	Positive	Positive	Negative	Luminal A	non-HER2A	1.284	-0.0959428	0.761054	-0.777184	0.0920477
HP-52457	Positive	Positive	Negative	Luminal A	non-HER2A	2.479	0.605298	0.128668	0.0763179	-0.334688
HP-52459	Negative	Negative	Negative	Basal-like	non-HER2A	2.004	-0.234307	-0.87776	-0.643677	-0.643677
HP-52460	Positive	Negative	Negative	Luminal A	non-HER2A	1.504	0.683156	0.975204	-0.508448	-0.435897
HP-52461	Positive	Positive	Negative	Luminal A	non-HER2A	2.06	0.135373	0.416027	-0.262567	-0.177666
HP-52608	Negative	Negative	Negative	Basal-like	non-HER2A	2.139	-0.00480945	-1.47721	-1.76666	-1.43263
HP-52609	Negative	Negative	Negative	Basal-like	HER2A	6.883	-0.509419	-1.78242	-2.20839	-1.46366
HP-52610	Negative	Negative	Negative	Basal-like	non-HER2A	1.257	-0.280538	-1.5102	-2.09266	-1.65102
HP-56320	Negative	Negative	Negative	Basal-like	non-HER2A	1.56	-0.0627319	-1.5113	-1.59845	-1.5113
HP-56321	Positive	Positive	Negative	Luminal B	non-HER2A	1.788	0.381187	0.751853	-0.174361	0.218901
HP-56323	Negative	Negative	Negative	Basal-like	non-HER2A	2.189	0.191072	-1.27431	-1.30427	-1.05246
HP-56324	Negative	Negative	Negative	Basal-like	non-HER2A	1.637	-0.239158	-1.0587	-1.0587	-0.716279
HP-56325	Positive	Positive	Negative	Luminal A	non-HER2A	2.369	0.626509	0.653662	-0.300581	-0.137854
HP-56326	Positive	Positive	Negative	Luminal B	non-HER2A	1.618	0.202504	0.396039	0.0892717	-0.304073
HP-56327	Positive	Positive	Negative	Luminal A	non-HER2A	2.224	0.793421	0.244554	-0.454416	-0.329477
HP-56328	Negative	Negative	Negative	Basal-like	non-HER2A	1.482	-0.0399763	-0.960795	-1.37097	-0.835856
HP-56334	Positive	Positive	Negative	Luminal A	non-HER2A	1.812	0.462702	0.902703	-0.00351609	-0.0734642
HP-56336	Positive	Positive	Negative	Luminal B	non-HER2A	1.911	-0.235626	0.166225	-0.848737	-0.432389
HP-56339	Negative	Negative	Negative	Basal-like	non-HER2A	1.738	-0.252421	-1.69847	-1.30053	-0.99334
HP-56340	Positive	Positive	Negative	Luminal B	non-HER2A	2.449	0.104002	-0.0314786	-0.194691	-0.447948
HP-56342	Positive	Positive	Negative	Luminal A	non-HER2A	1.667	0.90309	0.937852	0.726999	0.60206
HP-56343	Positive	Positive	Negative	Luminal B	non-HER2A	1.552	0.145881	0.197955	0.113342	-0.423336
HP-56344	Negative	Negative	Positive	Basal-like	non-HER2A	2.786	-0.129201	-1.16492	-1.49813	-1.14968
HP-56348	Positive	Negative	Negative	Luminal A	non-HER2A	1.887	0.464031	0.734092	-1.2297	0.0490574
HP-56353	Negative	Negative	Negative	HER2E	non-HER2A	2.029	0.196837	-1.34098	-1.94304	-0.058435
HP-56354	Negative	Negative	Negative	HER2E	non-HER2A	2.047	0.675953	-1.39803	-1.11279	0.264056
HP-56357	Negative	Negative	Negative	Basal-like	non-HER2A	3.174	0.268239	-0.828671	-1.22661	-0.506452
HP-56358	Negative	Negative	Negative	HER2E	non-HER2A	1.652	0.752491	-1.46674	-1.3418	0.202263
HP-56359	Positive	Negative	Negative	Luminal A	non-HER2A	1.779	0.482359	0.832974	-0.722846	0.290834
HP-56360	Negative	Negative	Negative	Basal-like	non-HER2A	2.033	0.262759	-0.574513	-0.875543	-0.273483
HP-56361	Negative	Negative	Negative	Basal-like	non-HER2A	2.226	0.0411747	-1.37795	-1.50289	-1.23183
HP-56364	Negative	Positive	Negative	Basal-like	non-HER2A	1.561	-0.102079	-1.29665	-1.42793	-0.86599
HP-56365	Negative	Negative	Positive	Basal-like	HER2A	6.638	1.3382	-1.09551	-1.52147	-1.06074
HP-56366	Positive	Positive	Negative	Luminal A	non-HER2A	1.601	-0.0997218	0.306784	0.0982997	-0.281912
HP-56367	Positive	Positive	Negative	Luminal A	non-HER2A	1.513	0.0406624	0.0239641	0.00865347	-0.098737
HP-57121	Positive	Negative	Negative	Luminal A	non-HER2A	2.231	0.439146	0.470042	0.31753	0.151904
HP-57125	Positive	Positive	Negative	Luminal A	non-HER2A	2.326	0.395733	-0.0767491	-0.53194	0.126722
HP-57126	Positive	Positive	Negative	Luminal B	non-HER2A	1.531	0.138076	0.848189	-0.283822	-0.591383
HP-57127	Positive	Negative	Negative	Luminal B	non-HER2A	3.618	0.662639	0.0834637	-1.33649	-0.0646504
HP-57133	Negative	Negative	Negative	Basal-like	non-HER2A	1.572	0.075788	-1.50034	-1.56401	-1.39561
HP-57134	Positive	Positive	Negative	Luminal A	non-HER2A	1.448	-0.175892	0.229874	-0.217284	-0.263042
HP-57138	Positive	Positive	Negative	Luminal A	non-HER2A	2.066	0.207797	0.493587	0.820946	0.23676
HP-57139	Negative	Negative	Negative	Basal-like	non-HER2A	1.372	0.0341623	-1.03552	-1.71789	-1.54179
HP-57140	Negative	Negative	Negative	Basal-like	non-HER2A	1.026	-0.520208	-1.88089	-1.93204	-1.79374
HP-57141	Positive	Negative	Negative	Luminal A	non-HER2A	1.692	0.30103	0.544068	0.138303	0.138303
HP-57142	Positive	Negative	Negative	Luminal A	non-HER2A	1.624	0.66749	-0.0190548	-0.956907	0.0800766
HP-57143	Negative	Negative	Negative	HER2E	non-HER2A	2.515	0.186984	-1.47679	-1.8689	-1.08121
HP-57144	Positive	Negative	Negative	Basal-like	non-HER2A	1.736	-0.44898	-1.46819	-2.09144	-1.72972
HP-57146	Positive	Positive	Negative	Luminal A	non-HER2A	1.554	-0.237665	0.339571	-0.589848	-0.34681
HP-57149	Positive	Positive	Negative	Luminal A	non-HER2A	1.982	0.548571	0.416111	-0.0780859	0.161674
HP-57153	Positive	Positive	Negative	Luminal A	non-HER2A	1.601	0.393582	0.613549	-0.8524	-0.255541
HP-57155	Positive	Negative	Negative	Luminal B	non-HER2A	1.591	-0.638919	0.155709	-1.16763	-1.04342
HP-57157	Positive	Negative	Negative	Luminal B	non-HER2A	1.358	-0.0324926	0.245948	-1.94157	0.0864557
HP-57159	Positive	Positive	Negative	Luminal A	non-HER2A	2.087	0.421496	0.651697	0.287016	0.164534
HP-57161	Positive	Positive	Negative	Luminal A	non-HER2A	3.768	0.360036	0.87905	0.268589	0.360036
HP-57163	Positive	Positive	Negative	Luminal A	non-HER2A	1.417	0.362548	0.900723	0.416423	0.10067
HP-57165	Positive	Positive	Negative	Luminal A	non-HER2A	1.716	0.261439	0.106537	0.164529	0.215682
HP-57166	Negative	Negative	Negative	Basal-like	non-HER2A	2.892	-0.562659	-1.86456	-2.69823	-2.3972
HP-57167	Positive	Negative	Negative	Luminal B	non-HER2A	1.715	-0.347822	-0.166131	-1.7701	-0.467161
HP-57168	Negative	Negative	Negative	Basal-like	non-HER2A	2.165	0.0716435	-1.04338	-0.802344	-0.818735
HP-57169	Positive	Positive	Negative	Luminal A	non-HER2A	2.019	0.29578	0.08456	0.000579833	0.195556
HP-57171	Negative	Negative	Negative	Basal-like	non-HER2A	1.596	-0.360127	-1.56712	-1.93819	-1.31494
HP-57173	Positive	Positive	NA	Luminal A	non-HER2A	1.997	0.0122672	-0.468119	-0.754645	-0.327884
HP-57174	Negative	Negative	Negative	Basal-like	non-HER2A	1.383	-0.532264	-1.68987	-1.96457	-1.3317
HP-57175	Positive	Positive	Negative	Luminal A	non-HER2A	1.561	0.273878	0.831249	-0.934937	0.232252
HP-57176	Negative	Negative	Negative	Basal-like	non-HER2A	2.184	-0.311969	-1.54581	-1.46663	-1.39968
HP-57177	Positive	Positive	Negative	Luminal A	non-HER2A	2.17	0.402885	0.142096	-1.27416	0.00809582
HP-57763	Positive	Positive	Negative	Luminal A	non-HER2A	1.399	0.430872	0.994803	-0.271858	0.305933
HP-57764	Positive	Negative	Positive	Luminal A	non-HER2A	4.488	0.972734	0.194583	0.0898477	-0.048455
HP-57766	Negative	Negative	Negative	Basal-like	non-HER2A	1.32	-0.511469	-1.79778	-1.47902	-1.4298
HP-57768	Negative	Negative	Negative	Luminal A	non-HER2A	1.59	0.506991	-0.263042	-0.217284	-0.0131645
HP-57769	Positive	Negative	Negative	Luminal B	non-HER2A	1.403	0.0485681	0.0147099	-0.417829	-0.252462
HP-57770	Negative	Positive	Negative	Basal-like	non-HER2A	1.958	-0.0783799	-1.81953	-1.07917	-1.27546
HP-57771	Positive	Positive	Negative	Luminal A	non-HER2A	1.801	0.143503	0.799274	-0.201236	0.302314
HP-57772	Positive	Negative	Negative	Luminal B	non-HER2A	1.363	-0.258077	-0.150443	-0.77795	-0.484473
HP-57773	Negative	Negative	Negative	Luminal A	non-HER2A	2.578	1.06832	0.281978	0.247561	-0.276813
HP-57774	Positive	Positive	Negative	Luminal A	non-HER2A	1.903	0.336923	-0.143065	-0.548743	0.105552
HP-57775	Negative	Negative	Negative	Basal-like	non-HER2A	2.061	-0.282048	-1.44857	-1.98848	-1.71741
HP-57776	Negative	Negative	Negative	Basal-like	non-HER2A	2.024	-0.205786	-1.41788	-1.895	-1.70311
HP-57777	Negative	Negative	Negative	Basal-like	non-HER2A	1.364	-0.0435186	-0.794518	-0.659819	-0.794518
HP-57779	Positive	Positive	Negative	Luminal A	non-HER2A	1.791	0.440424	0.0685866	-0.571262	0.0501032
HP-57780	Negative	Negative	Negative	Luminal A	non-HER2A	1.562	0.187087	-0.335792	-0.414973	0.363178
HP-57783	Positive	Positive	Negative	Luminal A	non-HER2A	2.133	0.773174	1.34806	0.527396	0.641022
HP-57784	Negative	Negative	Negative	Basal-like	non-HER2A	2.027	0.388881	-1.35511	-1.62396	-1.03769
HP-57786	Positive	Positive	Negative	Luminal A	non-HER2A	1.695	-0.09691	0.342423	0.0791812	-0.221849
HP-57787	Positive	Positive	Negative	Luminal A	non-HER2A	2.172	0.543543	0.2394	0.135799	0.00486976
HP-57789	Positive	Negative	Negative	Luminal A	non-HER2A	1.697	0.439799	0.352086	-0.493012	0.0121375
HP-57790	Negative	Negative	Negative	Basal-like	non-HER2A	2.048	-0.0387367	-1.44148	-1.82169	-1.59984
HP-57794	Positive	Positive	Negative	Luminal A	non-HER2A	1.722	0.124659	0.714644	0.342567	0.0581787
HP-57796	Negative	Negative	Negative	Basal-like	non-HER2A	2.135	-0.300063	-1.15153	-1.76883	-1.23372
HP-57797	Positive	Positive	Negative	Luminal A	non-HER2A	1.789	0.637664	0.542438	0.137436	-0.0351096
HP-57798	Positive	Positive	Positive	Luminal B	non-HER2A	2.333	0.24813	0.276796	-0.303533	-0.192662
HP-57800	Negative	Positive	Positive	HER2E	HER2A	14.7	1.61414	-1.18631	-1.10713	-0.105319
HP-57802	Positive	Positive	Negative	Luminal A	non-HER2A	2.016	0.458447	0.373634	-0.35232	0.538416
HP-57805	Negative	Negative	Positive	HER2E	non-HER2A	1.856	0.499446	-0.892665	-1.11991	0.306399
HP-57806	Positive	Positive	Positive	Luminal B	HER2A	6.336	1.3663	0.547874	-0.67437	-0.124698
HP-57808	Positive	Positive	Negative	Luminal A	non-HER2A	1.624	0.5114	0.446047	0.390699	0.31236
HP-57809	Positive	Negative	Negative	Luminal A	non-HER2A	1.329	0.38596	0.254977	-0.670777	-0.0488935
HP-57810	Negative	Negative	Positive	Luminal A	HER2A	8.098	1.28143	-0.385351	-0.385351	0
HP-57811	Negative	Negative	Negative	Basal-like	non-HER2A	2.814	-0.630353	-2.03558	-2.33661	-1.90649
HP-57812	Positive	Positive	Negative	Luminal A	non-HER2A	2.282	0.505206	-0.220746	-0.153925	0.00757353
HP-57813	Positive	Negative	Negative	Luminal A	non-HER2A	1.145	-0.459922	-0.0141402	-1.65858	-1.11039
HP-57814	Positive	Positive	Negative	Luminal B	non-HER2A	2.971	0.40558	-0.259587	-0.615387	-0.352145
HP-57815	Positive	Positive	Positive	HER2E	HER2A	13.752	1.38826	-0.501971	-1.07267	-0.190544
HP-57997	Negative	Negative	Negative	Basal-like	non-HER2A	1.684	-0.513273	-0.922642	-1.35837	-0.908402
HP-57999	Positive	Positive	Negative	Luminal A	non-HER2A	2.182	0.491315	0.0903743	-0.505933	0.00348142
HP-58000	Negative	Negative	Positive	HER2E	non-HER2A	4.872	1.04445	-1.03782	-1.58189	-0.736793
HP-58001	Positive	Positive	Positive	Luminal A	HER2A	5.401	1.00367	0.578012	-0.401785	0.0101407
HP-58024	Positive	Positive	Positive	Luminal A	non-HER2A	1.513	0.0540794	0.267848	0.0439555	-0.100537
HP-58025	Negative	Negative	Positive	Basal-like	non-HER2A	1.967	-0.215269	-0.749929	-0.82051	-0.653019
HP-58026	Positive	Positive	Negative	Luminal A	non-HER2A	1.573	-0.028943	0.114267	-0.316609	0.0161354
HP-58027	Negative	Negative	Negative	Basal-like	non-HER2A	1.246	0.0744059	-1.05962	-1.17357	-0.214526
HP-58028	Positive	Positive	Negative	Basal-like	non-HER2A	3.765	0.186908	-1.37657	-1.53148	-0.56366
HP-58029	Positive	Negative	Positive	Luminal A	HER2A	9.264	1.4803	-0.145017	-0.299919	0.235194
HP-58030	Positive	Positive	Negative	Luminal B	non-HER2A	1.175	-0.186994	-0.258823	-0.669444	-0.63841
HP-58031	Negative	Negative	Negative	Luminal A	non-HER2A	2.154	0.272203	0.478384	-0.263365	0.252695
HP-58032	Positive	Positive	Negative	Luminal A	non-HER2A	1.634	0.295952	0.44506	-0.0916472	0.0252339
HP-58033	Positive	Positive	Negative	Luminal A	non-HER2A	1.436	0.575702	1.09945	0.386718	0.310471
HP-58035	Positive	Positive	Negative	Luminal A	non-HER2A	1.294	0.546461	-0.0149816	0.181313	0.16111
HP-58036	Positive	Negative	Negative	Basal-like	non-HER2A	2.589	-0.513546	-1.62749	-2.10461	-1.5861
HP-58037	Positive	Positive	Negative	Luminal B	non-HER2A	1.455	-0.212522	-0.326521	-0.467352	-0.466357
HP-58039	Positive	Positive	Negative	Luminal A	non-HER2A	1.635	0.513226	0.933896	0.160638	0.171451
HP-58041	Positive	Positive	Negative	Luminal B	non-HER2A	1.547	0.0834273	-0.492879	-0.986087	-0.187919
HP-58042	Negative	Negative	Negative	Luminal A	non-HER2A	1.778	0.308949	0.336052	-0.750927	0.104829
HP-58043	Negative	Negative	Negative	Basal-like	non-HER2A	1.558	-0.56956	-1.08807	-1.6779	-1.53523
HP-58044	Positive	Positive	Positive	Luminal A	HER2A	10.955	1.50831	0.22642	-0.37564	-0.120367
HP-58045	Negative	Negative	Negative	Luminal A	non-HER2A	2.15	0.0770895	-0.357834	-0.613107	-0.121745
HP-58046	Positive	Positive	Negative	Luminal A	non-HER2A	1.784	0.422344	0.57386	0.358897	0.187658
HP-58049	Negative	Negative	Negative	HER2E	non-HER2A	1.041	0.174753	-1.01558	-1.5129	-0.349401
HP-58050	Negative	Negative	Positive	HER2E	HER2A	7.013	1.50271	-1.27382	-1.50426	0.266587
HP-58051	Positive	Negative	Negative	Luminal A	non-HER2A	1.662	0.232486	0.159379	0.053326	0.00447742
HP-58053	Negative	Positive	Negative	Luminal A	non-HER2A	1.654	0.504733	0.530934	0.133503	0.14848
HP-58054	Negative	Negative	Positive	Luminal A	HER2A	12.627	1.25594	-0.108473	-0.409503	-0.0642696
HP-58055	Positive	Positive	Negative	Luminal A	non-HER2A	1.901	-0.361728	0.129634	-0.407485	0.0854302
HP-58056	Positive	Negative	Negative	Luminal A	non-HER2A	1.153	-0.316816	0.023312	-0.793937	-0.269174
HP-58057	Positive	Positive	Negative	Luminal A	non-HER2A	1.301	0.107964	0.383523	-0.0115119	0.124151
HP-58058	Positive	Positive	Negative	Luminal A	non-HER2A	1.351	-0.884504	-0.106353	-0.583474	-0.106353
HP-58060	Positive	Positive	Negative	Luminal A	non-HER2A	2.361	-0.134235	0.173135	0.0901612	0.347124
HP-58061	Negative	Negative	Negative	Basal-like	non-HER2A	1.516	-0.430079	-1.63156	-1.47947	-1.00235
HP-58062	Positive	Positive	Negative	Luminal A	non-HER2A	1.852	0.302625	0.244213	0.166374	-0.124324
HP-58063	Positive	Positive	Negative	Luminal B	non-HER2A	1.43	-0.280003	-0.157286	-1.04078	-0.959475
HP-58064	Positive	Positive	Negative	Basal-like	non-HER2A	1.673	-0.539002	-1.49625	-1.46992	-1.46992
HP-58066	Positive	Positive	Negative	Basal-like	non-HER2A	2.049	0.0590719	-1.37229	-1.82655	-1.30703
HP-58067	Positive	Positive	Negative	Luminal B	non-HER2A	1.732	-0.093702	0.216881	-0.74017	-0.277008
HP-58187	Negative	Negative	Negative	Basal-like	non-HER2A	1.999	-0.0308458	-1.84709	-1.82076	-1.82076
HP-58188	Positive	Positive	Negative	Luminal A	non-HER2A	0.865	0.11036	0.538866	0.468533	0.179241
HP-58189	Negative	Negative	Negative	Basal-like	non-HER2A	1.275	-0.445813	-1.42582	-1.62994	-1.25702
HP-58190	Negative	Negative	Negative	Basal-like	non-HER2A	1.095	-0.234894	-0.933864	-1.23489	-1.09356
HP-58191	Negative	Negative	Negative	Luminal A	non-HER2A	1.282	0.274427	0.0142334	-0.40074	0.339623
HP-58192	Negative	Positive	Negative	Basal-like	non-HER2A	2.517	0.553131	-1.64039	-1.55607	-1.37155
HP-58193	Negative	Negative	Negative	Luminal A	non-HER2A	1.39	-1.19635	-0.0502204	-0.218625	-0.154956
HP-58194	Positive	Positive	Positive	Luminal A	non-HER2A	2.731	0.76083	-0.274689	-0.545458	-0.508133
HP-58196	Negative	Negative	Positive	HER2E	HER2A	6.137	1.49116	-0.960017	-1.64212	-0.111249
HP-58197	Positive	Negative	Negative	Luminal B	non-HER2A	2.835	0.359173	0.520223	-1.07887	-0.0573003
HP-58198	Positive	Negative	Negative	Luminal B	non-HER2A	3.393	0.504178	0.613154	-1.11877	0.00967063
HP-58201	Positive	Negative	Negative	Luminal B	non-HER2A	1.715	0.00642017	0.640857	-1.10333	-0.309382
HP-58202	Negative	Negative	Positive	HER2E	HER2A	20.06	1.94913	-0.732326	-0.797593	-0.703037
HP-58203	Negative	Negative	Negative	Basal-like	non-HER2A	1.371	-0.163222	-1.04481	-1.91012	-0.574323
HP-58206	Negative	Negative	Negative	HER2E	non-HER2A	1.818	0.371728	-1.15254	-1.50909	0.3164
HP-58208	Positive	Positive	Negative	Luminal B	non-HER2A	1.604	0.189134	-0.284537	-0.4983	-0.0757703
HP-58209	Negative	Negative	Negative	Basal-like	non-HER2A	1.641	0.121529	-0.900082	-1.44415	-1.15891
HP-58210	Positive	Positive	Positive	Luminal B	non-HER2A	3.17	0.426989	-0.239224	-1.63426	-0.558105
HP-58211	Negative	Negative	Negative	Basal-like	non-HER2A	1.511	-0.139253	-1.46246	-1.83043	-1.26616
HP-58212	Negative	Positive	Negative	Luminal A	non-HER2A	1.456	0.0138357	-0.463286	-0.764316	-0.162256
HP-58214	Negative	Negative	Positive	HER2E	non-HER2A	2.018	1.16315	-0.634247	-1.23631	-0.589168
HP-58218	Positive	Positive	Negative	Luminal A	non-HER2A	1.611	0.131435	0.475866	-0.589565	-0.199463
HP-58219	Positive	Positive	Negative	Luminal A	non-HER2A	2.172	0.129426	0.588323	0.470223	0.0332594
HP-58222	Negative	Negative	Negative	Basal-like	non-HER2A	2.52	0.288706	-1.14181	-1.24447	-0.929202
HP-58223	Positive	Positive	Negative	Luminal B	non-HER2A	1.729	0.412748	0.234168	-1.26602	0.272372
HP-58224	Negative	Negative	Positive	HER2E	HER2A	18.921	1.86777	-0.936807	-1.3805	-0.270289
HP-58225	Negative	Negative	Negative	Basal-like	non-HER2A	1.619	-0.667156	-1.38572	-1.35354	-1.29555
HP-58227	Positive	Positive	Negative	Luminal A	non-HER2A	2.06	0.0240182	-0.0197608	-0.755623	-0.307826
HP-58228	Positive	Positive	Negative	Luminal A	non-HER2A	1.888	0.299672	-0.176811	-0.479758	-0.231807
HP-58229	Negative	Negative	Negative	Basal-like	non-HER2A	1.226	0.0217328	-1.02173	-1.25909	-0.431255
HP-58363	Negative	Negative	Positive	HER2E	HER2A	21.347	0.973193	-1.46797	-2.09559	-0.648901
HP-58364	Positive	Positive	Negative	Luminal B	HER2A	5.366	0.58933	0.228573	-0.185562	-0.0884229
HP-58365	Negative	Negative	Negative	Basal-like	non-HER2A	1.842	-0.0561547	-1.96997	-1.94514	-1.73802
HP-58366	Positive	Positive	Negative	Luminal A	non-HER2A	1.251	-0.0685899	0.101759	-1.22227	-0.248172
HP-58833	Negative	Negative	Positive	Basal-like	non-HER2A	2.068	0.125923	-0.957759	-1.91884	-0.781667
HP-58834	Positive	Positive	Positive	Luminal A	non-HER2A	2.371	0.944497	-0.0338123	-0.35381	-0.091981
HP-58836	Negative	Negative	Negative	Basal-like	non-HER2A	1.545	0.188721	-1.57019	-1.57019	-0.731342
HP-58839	Positive	Positive	Negative	Luminal B	non-HER2A	2.127	0.0727572	0.302034	-0.261088	-0.138682
HP-58840	Positive	Positive	Negative	Luminal A	non-HER2A	3.777	0.365417	0.435956	0.645763	-0.0312621
HP-58841	Negative	Negative	Positive	HER2E	HER2A	21.259	1.64381	-1.09503	-1.20084	-0.0926916
HP-58842	Negative	Negative	Negative	Basal-like	non-HER2A	1.996	0.250751	-1.23236	-1.16541	-0.913602
HP-58843	Positive	Positive	Positive	Luminal A	non-HER2A	3.113	0.68745	1.0511	-0.286055	-0.0124631
HP-58845	Positive	Positive	Negative	Luminal A	non-HER2A	3.145	0.00611723	-0.073064	-0.294913	0.073064
HP-58851	Positive	Positive	Negative	Luminal A	non-HER2A	1.602	0.125432	0.0584849	0.0584849	0.234576
HP-58852	Negative	Negative	Negative	Basal-like	non-HER2A	1.567	0.188559	-1.04313	-1.75283	-0.915556
HP-58854	Positive	Positive	Negative	Luminal A	non-HER2A	1.467	0.0269978	0.0655015	0.021596	-0.0542282
HP-58855	Positive	Positive	Negative	Luminal A	non-HER2A	1.927	0.54915	0.795241	0.848837	0.078019
HP-58873	Negative	Negative	Negative	Luminal A	non-HER2A	2.268	0.109144	-0.146128	0.0579919	0.109144
HP-58874	Positive	Positive	Positive	Luminal A	non-HER2A	4.251	0.95759	-0.282246	-0.838903	0.0378583
HP-58875	Negative	Negative	Negative	HER2E	non-HER2A	1.74	0.0539524	-1.75561	-1.15355	0.448513
HP-58876	Positive	Positive	Negative	Luminal A	non-HER2A	4.028	0.773134	0.562174	0.617747	0.338021
HP-58877	Negative	Negative	Negative	Basal-like	non-HER2A	1.869	-0.239479	-1.59741	-2.03314	-1.08776
HP-58888	Negative	Negative	Negative	Basal-like	non-HER2A	2.247	-0.143336	-1.20092	-1.16404	-1.03036
HP-58889	Positive	Negative	Negative	Luminal B	non-HER2A	2.086	0.662974	0.0604113	-1.33619	-0.380096
HP-58890	Positive	Positive	Negative	Luminal A	non-HER2A	1.712	0.226591	-0.53221	-0.688823	-0.56747
HP-58891	Negative	Negative	Negative	Basal-like	non-HER2A	1.294	-0.353042	-1.41317	-1.67641	-1.3519
HP-58893	Negative	Negative	Negative	Basal-like	non-HER2A	1.841	-0.388062	-2.13754	-2.11406	-1.8743
HP-58894	Negative	Negative	Negative	Basal-like	non-HER2A	1.912	-0.292879	-1.11294	-1.67438	-1.31536
HP-58895	Positive	Negative	Negative	Luminal B	non-HER2A	2.183	-0.269504	0.594177	-2.12617	0.0361993
HP-58898	Positive	Positive	Negative	Luminal A	non-HER2A	1.603	0.352413	-0.035994	-0.432508	-0.249355
HP-58899	Positive	Positive	Negative	Luminal B	non-HER2A	2.686	-0.0145015	-0.0290794	-1.01031	-0.443007
HP-58900	Negative	Negative	Negative	Basal-like	non-HER2A	2.151	0.0204906	-0.647472	-0.89051	-0.689595
HP-58901	Positive	Positive	Negative	Luminal A	non-HER2A	2.224	0.531838	0.0518308	-0.232166	-0.314701
HP-58902	Positive	Positive	Negative	Luminal A	non-HER2A	1.646	0.181975	0.283343	-0.406568	-0.129291
HP-58903	Positive	Positive	Negative	Luminal A	non-HER2A	2.153	0.437043	0.204214	-0.141074	-0.0307291
HP-58904	Positive	Positive	Negative	Luminal A	non-HER2A	4.92	0.465971	0.203005	-0.656764	-0.202208
HP-58905	Negative	Negative	Negative	Basal-like	non-HER2A	2.482	-0.516281	-1.55286	-2.02998	-1.58001
HP-58907	Negative	Negative	Negative	Basal-like	non-HER2A	2.322	-0.0252304	-1.56758	-1.82586	-1.4502
HP-58908	Positive	Positive	Negative	Luminal A	non-HER2A	1.874	-0.120595	-0.205423	-0.554481	-0.886351
HP-58911	Negative	Positive	Positive	Basal-like	non-HER2A	2.875	-0.172732	-1.81193	-1.71918	-1.30164
HP-59046	Positive	Positive	Negative	Luminal A	non-HER2A	1.412	0.380976	0.577498	0.263503	0.138565
HP-59047	Positive	Positive	Negative	Luminal A	non-HER2A	1.323	0.735058	0.677203	0.440076	0.394107
HP-59048	Positive	Positive	Negative	Luminal A	non-HER2A	1.388	0.444059	0.431284	0.559452	0.329486
HP-59051	Negative	Negative	Negative	Basal-like	non-HER2A	1.614	-0.157488	-0.959121	-1.73727	-1.56118
HP-59052	Positive	Positive	Negative	Luminal A	non-HER2A	2.207	0.416166	0.091803	0.100182	-0.327326
HP-59053	Positive	Positive	Negative	Luminal A	non-HER2A	2.02	0.403123	-0.101373	-0.521957	0.200237
HP-59054	Positive	Positive	Negative	Luminal A	non-HER2A	2.146	0.227286	0.724843	0.0144528	0.233223
HP-59055	Positive	Negative	Negative	Luminal A	non-HER2A	2.564	0.441689	0.318411	-0.559382	-0.143584
HP-59057	Negative	Negative	Negative	HER2E	non-HER2A	1.96	-0.055656	-1.09308	-1.13884	-0.678109
HP-59058	Positive	Positive	Negative	Luminal A	non-HER2A	1.155	0.28579	0.50139	0.190815	0.370111
HP-59060	Positive	Positive	Negative	Luminal A	non-HER2A	1.728	0.526121	0.377681	0.704707	0.138774
HP-59062	Positive	Positive	Negative	Luminal A	non-HER2A	2.012	0.387307	0.382069	-0.17114	-0.0599073
HP-59063	Positive	Positive	Negative	Luminal B	non-HER2A	3.324	0.441397	-0.00704968	-0.25562	-0.570798
HP-59064	Negative	Negative	Negative	Basal-like	non-HER2A	1.794	-0.0136204	-1.21228	-1.03619	-0.869855
HP-59065	Positive	Positive	Negative	Luminal A	non-HER2A	1.432	0.42339	0.896018	0.266963	0.328881
HP-59066	Positive	Positive	Negative	Luminal A	non-HER2A	3.821	0.291032	0.305403	-0.523508	-0.336952
HP-59067	Positive	Positive	Negative	Luminal A	non-HER2A	1.921	0.245271	0.369197	0.248407	0.111552
HP-59068	Positive	Positive	Negative	Luminal A	non-HER2A	1.388	-0.0268034	-0.168188	-0.792841	0.051051
HP-59070	Positive	Positive	Negative	Luminal A	non-HER2A	1.68	0.419039	0.186332	0.389076	0.223204
HP-59071	Negative	Negative	Negative	Basal-like	non-HER2A	1.319	-0.544931	-1.36168	-1.84724	-1.37872
HP-59074	Negative	Negative	Negative	Basal-like	non-HER2A	1.661	0.0876662	-1.3383	-1.56361	-1.12904
HP-59075	Positive	Positive	Negative	Luminal A	non-HER2A	2.28	0.434917	0.376925	0.441257	0.358283
HP-59076	Negative	Negative	Negative	Basal-like	non-HER2A	1.44	0.0465156	-1.17034	-1.23729	-0.811319
HP-59078	Negative	Negative	Negative	Basal-like	non-HER2A	1.416	-0.31991	-1.25815	-1.61287	-1.45229
HP-59080	Negative	Negative	Negative	Basal-like	non-HER2A	3.04	0.424864	-0.950957	-1.41335	-1.18291
HP-59083	Negative	Negative	Negative	Basal-like	non-HER2A	1.733	0.130243	-1.406	-1.65588	-1.2677
HP-59084	Positive	Positive	Negative	Luminal B	non-HER2A	1.181	0.353541	0.724818	0.164323	-0.0884752
HP-59085	Negative	Negative	Negative	Basal-like	non-HER2A	1.054	-0.236005	-1.17978	-1.84879	-1.07064
HP-59088	Negative	Negative	Negative	Basal-like	non-HER2A	1.884	-0.684912	-1.51422	-2.11628	-1.70879
HP-59091	Negative	Positive	Negative	Luminal A	non-HER2A	2.05	-0.0226882	-0.168068	-0.100374	-0.0618404
HP-59094	Positive	Negative	Negative	Luminal A	non-HER2A	1.382	0.212891	0.702154	-1.12457	-0.0490216
HP-59954	Negative	Negative	Negative	Basal-like	non-HER2A	1.357	0.237745	-0.848615	-1.00352	-1.07046
HP-59955	Positive	Positive	Negative	Luminal A	non-HER2A	1.726	0.398847	0.688804	0.180003	-0.300878
HP-59956	Negative	Negative	Negative	Basal-like	non-HER2A	1.896	-0.00168603	-1.17099	-1.85022	-1.28595
HP-59957	Negative	Negative	Negative	Basal-like	non-HER2A	2.49	-0.0409927	-1.44798	-1.74901	-1.3943
HP-59959	Negative	Negative	Negative	Basal-like	non-HER2A	1.648	-0.359734	-1.21707	-1.7911	-1.39316
HP-59963	Positive	Positive	Negative	Luminal A	non-HER2A	1.57	0.626974	0.928917	-0.687992	0.405125
HP-59965	Positive	Positive	Negative	Luminal A	non-HER2A	1.862	0.625789	0.217549	-0.527179	0.109643
HP-59966	Negative	Negative	Negative	Basal-like	non-HER2A	2.382	-0.0460416	-1.41953	-1.92014	-0.957925
HP-59967	Negative	Negative	Negative	Basal-like	non-HER2A	2.584	-0.406712	-1.2773	-1.61309	-1.06902
HP-59968	Positive	Positive	Positive	Luminal A	non-HER2A	2.04	0.373079	0.227714	0.106713	-0.34565
HP-59969	Positive	Positive	Positive	Luminal A	non-HER2A	2.116	0.270506	0.297765	0.352511	-0.112174
HP-59972	Positive	Negative	Negative	Basal-like	non-HER2A	1.855	0.220691	-0.742238	-1.30651	-0.783631
HP-59973	Negative	Negative	Negative	Luminal A	non-HER2A	1.788	0.319062	-0.773483	-0.500482	0.0942787
HP-59975	Positive	Positive	Negative	Luminal A	non-HER2A	1.591	-0.221849	0.146128	0.0791812	0.0791812
HP-59977	Positive	Positive	Negative	Luminal A	non-HER2A	1.669	0.340511	0.508535	0.44847	0.402481
HP-59978	Positive	Positive	Negative	Basal-like	non-HER2A	2.17	-0.248898	-1.0187	-1.65968	-1.0714
HP-59979	Positive	Positive	Negative	Luminal A	non-HER2A	1.821	-0.107532	-0.323132	-0.16823	0.246743
HP-59981	Positive	Positive	Negative	Luminal A	non-HER2A	1.903	0.827555	0.882736	0.504985	0.32072
HP-59982	Negative	Negative	Negative	Luminal B	non-HER2A	1.816	0.091622	0.165657	-0.521958	-0.544317
HP-59984	Positive	Positive	Negative	Luminal A	non-HER2A	1.582	0.240236	0.427686	-0.675764	0.12901
HP-59985	Negative	Negative	Negative	Basal-like	non-HER2A	1.714	0.0342207	-1.38459	-2.1975	-1.1975
HP-59986	Negative	Negative	Negative	Basal-like	non-HER2A	1.943	0.0636491	-1.40652	-1.52462	-0.642383
HP-59987	Positive	Positive	Negative	Luminal A	non-HER2A	1.449	0.448951	0.253116	0.48297	0.235071
HP-59989	Negative	Positive	Negative	Basal-like	non-HER2A	1.922	-0.288397	-1.74018	-0.934003	-1.83709
HP-59991	Positive	Positive	Negative	Luminal A	non-HER2A	1.605	0.524824	0.101104	0.354778	0.104678
HP-59992	Positive	Positive	Negative	Luminal A	non-HER2A	3.729	0.425975	0.497331	0.340545	0.206418
HP-59993	Positive	Positive	Negative	Luminal B	non-HER2A	1.837	0.145555	-0.487017	-0.986704	0.0286554
HP-59994	Positive	Negative	Negative	Luminal B	non-HER2A	1.928	0.196913	-0.408025	-0.603001	-0.503206
HP-59996	Positive	Positive	Negative	Luminal A	non-HER2A	1.839	0.227542	1.18384	0.539683	0.259443
HP-59997	Positive	Positive	Negative	Luminal A	non-HER2A	1.871	0.297771	0.0703794	-0.634609	-0.343798
HP-59998	Positive	Positive	Negative	Luminal A	non-HER2A	2.001	0.388393	0.528153	0.198863	0.18661
HP-59999	Positive	Positive	Negative	Luminal A	non-HER2A	1.757	0.529726	0.673307	-0.341542	0.423835
HP-60000	Positive	Positive	Negative	Luminal A	non-HER2A	1.759	0.253603	-0.149209	-1.13821	-0.123273
HP-60002	NA	NA	Negative	Basal-like	non-HER2A	1.878	0.284974	-0.647274	-0.756418	-0.560124
HP-61558	Negative	Negative	Negative	Basal-like	non-HER2A	1.709	-0.169051	-1.19901	-1.44205	-0.964931
HP-61559	Positive	Negative	Positive	Basal-like	non-HER2A	1.39	0.0858411	-0.480503	-1.28214	-1.06029
HP-61560	Negative	Negative	Negative	Basal-like	non-HER2A	1.973	-0.270741	-2.45258	-1.75361	-1.17383
HP-61561	Negative	Negative	Negative	Basal-like	non-HER2A	1.356	0.282258	-0.815986	-1.92993	-0.686891
HP-61562	Positive	Positive	Negative	Luminal A	non-HER2A	2.103	0.40487	-0.000895454	-0.19719	0.212984
HP-61563	Positive	Positive	Positive	Luminal A	non-HER2A	4.187	1.12495	0.482709	-0.146789	-0.218482
HP-61566	Positive	Positive	Negative	Luminal A	non-HER2A	1.193	-0.219666	-0.0435751	0.0021824	0.0021824
HP-61567	Negative	Positive	Negative	Basal-like	non-HER2A	1.786	0.256624	-0.650967	-0.88505	-0.0141448
HP-61568	Negative	Negative	Negative	Basal-like	non-HER2A	1.581	0.185603	-0.895766	-1.35358	-1.3351
HP-61569	Negative	Negative	Negative	Basal-like	non-HER2A	1.272	-0.406831	-1.5288	-1.96813	-1.58491
HP-61570	Positive	Positive	Negative	Luminal A	non-HER2A	1.677	0.479439	0.226484	0.369255	0.428649
HP-61574	Positive	Positive	Negative	Basal-like	non-HER2A	1.698	-0.37962	-1.74727	-1.91208	-1.74727
HP-61576	Positive	Negative	Negative	Luminal A	non-HER2A	0.949	0.326145	0.838161	-0.24102	0.141315
HP-61577	Negative	Negative	Positive	Basal-like	non-HER2A	1.608	-0.239969	-1.58169	-1.98745	-1.58169
HP-61578	Negative	Negative	Negative	Basal-like	non-HER2A	1.136	-0.0946594	-1.33065	-2.22591	-1.56586
HP-61579	Positive	Positive	Positive	Luminal A	non-HER2A	2.047	0.558835	0.850644	0.0630717	-0.0253502
HP-61580	Positive	Positive	Negative	Luminal A	non-HER2A	1.742	0.529494	0.124289	0.358518	-0.00239696
HP-61582	Negative	Negative	Negative	Basal-like	non-HER2A	1.449	-0.161662	-1.17765	-1.60362	-1.23564
HP-61583	Negative	Positive	Negative	Basal-like	non-HER2A	1.496	0.156919	-0.901533	-1.71814	-0.956381
HP-61584	Positive	Negative	Negative	Luminal A	non-HER2A	1.567	0.296646	-0.0618826	-1.18495	0.395626
HP-61585	Positive	Positive	Negative	Luminal A	non-HER2A	3.686	0.477129	0.0453454	-0.238651	-0.116627
HP-61586	Positive	Positive	Negative	Luminal A	non-HER2A	2.006	-0.112527	-0.413557	-0.589648	-0.137351
HP-61587	Positive	Positive	Negative	Luminal A	non-HER2A	1.247	0.113211	0.316977	0.0200528	-0.737577
HP-61588	Positive	Positive	Negative	Luminal A	non-HER2A	1.603	0.159032	0.864632	0.22118	0.175422
HP-61589	Positive	Positive	Negative	Luminal A	non-HER2A	1.742	-0.0187759	0.138143	-0.00663914	-0.143129
HP-61593	Positive	Positive	Negative	Basal-like	non-HER2A	1.637	-0.0380272	-1.25909	-1.60151	-1.37106
HP-61594	Positive	Positive	Negative	Luminal A	non-HER2A	2.762	0.525976	0.425106	0.110608	-0.0131921
HP-61597	Positive	Negative	Negative	Luminal A	non-HER2A	1.837	0.563608	0.524481	-0.592888	0.146312
HP-61739	Positive	Negative	Negative	Luminal A	non-HER2A	1.843	0.151623	0.509999	-0.235013	-0.211589
HP-61740	Negative	Negative	Negative	HER2E	non-HER2A	1.082	0.2579	-1.58902	-1.54071	-1.04132
HP-61741	Positive	Positive	Negative	Luminal A	non-HER2A	1.98	0.117126	0.458954	0.0283161	-0.256645
HP-61743	Positive	Positive	Negative	Luminal A	non-HER2A	1.898	-0.0269425	-0.131481	0.145242	-0.387634
HP-61744	Positive	Positive	Negative	Luminal A	non-HER2A	2.322	0.292069	0.391397	0.166433	-0.133482
HP-61745	Positive	Negative	Negative	Luminal B	non-HER2A	2.128	0.178303	0.405609	-1.67036	-0.46002
HP-61746	Negative	Negative	Negative	Basal-like	non-HER2A	1.711	-0.0308733	-1.34658	-1.45379	-1.0883
HP-61747	Negative	Negative	Negative	Basal-like	non-HER2A	1.811	0.0851478	-0.897984	-0.652002	-0.666928
HP-61748	Negative	Positive	Negative	Basal-like	non-HER2A	1.321	0.137488	-1.57143	-1.61973	-0.986856
HP-61794	Positive	Positive	Negative	Luminal A	non-HER2A	1.766	-0.0805795	0.677313	-0.264899	-0.328006
HP-61798	Negative	Negative	Negative	Basal-like	non-HER2A	1.571	0.219184	-0.859997	-1.43403	-0.922145
HP-61801	Positive	Positive	Negative	Luminal A	non-HER2A	1.708	0.30103	-0.60206	-0.60206	-0.60206
HP-61802	Negative	Negative	Negative	Basal-like	non-HER2A	1.623	-0.061346	-0.948642	-1.28186	-0.427317
HP-61805	Negative	Negative	Negative	HER2E	non-HER2A	2.566	-0.255838	-1.40197	-1.67817	-1.12726
HP-61808	Negative	Negative	Negative	Basal-like	non-HER2A	0.988	-0.0111046	-1.20355	-2.12001	-1.68068
HP-61810	Positive	Positive	Negative	Luminal A	non-HER2A	2.208	0.484572	1.03914	0.551766	0.0626218
HP-61811	Positive	Positive	Negative	Luminal A	non-HER2A	1.815	0.304199	0.28655	0.257587	0.253287
HP-61812	Positive	Positive	Positive	Luminal A	non-HER2A	1.528	0.0714402	0.000509005	0.0210307	-0.0360078
HP-61813	Negative	Negative	Negative	Basal-like	non-HER2A	1.156	0.104735	-0.529509	-0.564271	0.176091
HP-61814	Positive	Positive	Positive	Luminal B	non-HER2A	3.952	0.939166	-0.27709	-0.962217	0.00964057
HP-61815	Positive	Positive	Negative	Luminal B	non-HER2A	1.788	0.476471	0.0603353	-0.373629	0.0426966
HP-61816	Negative	Negative	Negative	Basal-like	non-HER2A	2.842	0.208963	-1.15277	-0.976674	-1.0015
HP-61818	Positive	Positive	Negative	Luminal B	non-HER2A	1.695	0.124482	-0.503008	-0.719075	-0.691271
HP-61819	Negative	Negative	Negative	Luminal A	non-HER2A	1.205	-0.154336	-0.314037	-0.290556	0.2632
HP-61820	Positive	Positive	Negative	Luminal A	HER2A	5.627	0.268055	0.611768	-0.531395	-0.273831
HP-61821	Positive	Positive	Negative	Basal-like	non-HER2A	1.425	-0.4711	-1.55422	-2.15628	-1.27404
HP-61822	Positive	Positive	Negative	Luminal A	non-HER2A	1.344	0.268845	0.161062	-0.787106	0.0732319
HP-61823	Positive	Positive	Negative	Luminal A	non-HER2A	2.114	0.441674	0.0464016	0.0446253	0.0401526
HP-62332	Negative	Negative	Negative	Luminal A	non-HER2A	1.77	-0.218994	-0.337093	-0.42727	0.222215
HP-62333	Positive	Negative	Negative	Luminal A	non-HER2A	2.23	-0.627636	0.0713338	0.0255763	0.150515
HP-62334	Positive	Positive	Positive	Luminal A	HER2A	15.775	0.301632	0.226999	0.0642714	0.19897
HP-62335	Positive	Positive	Positive	Luminal A	HER2A	9.617	1.06624	-0.0477023	-0.0228787	0.136822
HP-62336	Positive	Positive	Negative	Luminal A	non-HER2A	1.898	-0.136501	-0.370584	-0.136501	0.116757
HP-62338	Positive	Positive	NA	HER2E	HER2A	10.779	1.30757	-0.856787	-1.02915	-0.177735
HP-62339	Negative	Negative	Negative	Basal-like	non-HER2A	2.263	-0.721353	-1.85924	-2.0966	-1.99187
HP-62340	Positive	Positive	Negative	Luminal A	non-HER2A	1.945	0.239607	0.301755	-0.435004	-0.124214
HP-62341	Positive	Negative	NA	Luminal A	non-HER2A	3.093	0.462786	0.851181	0.308558	0.137487
HP-62342	Positive	Negative	Negative	Luminal B	HER2A	9.942	0.745278	-0.153734	-1.46296	-0.176652
HP-62343	Negative	Negative	Negative	Basal-like	non-HER2A	1.339	-0.228214	-1.38456	-1.73674	-1.03777
HP-62344	Negative	Negative	Negative	Basal-like	non-HER2A	1.969	0.403772	-0.384598	-0.275454	-0.275454
HP-62346	Negative	Negative	Negative	Basal-like	non-HER2A	2.069	-0.367497	-0.799806	-1.12716	-0.751501
HP-62347	Positive	Positive	Negative	Luminal A	non-HER2A	1.827	0.345077	0.831153	-0.558013	0.0440468
HP-62349	Negative	Negative	Negative	Basal-like	non-HER2A	1.956	-0.0864264	-1.00446	-1.08018	-0.712201
HP-62350	Negative	Negative	Negative	Basal-like	non-HER2A	1.904	-0.0355567	-1.25985	-1.64386	-1.29936
HP-62351	Positive	Positive	Negative	Luminal A	non-HER2A	1.269	0.160455	-0.0756338	-0.251725	-0.154815
HP-62352	Negative	Negative	Negative	Basal-like	non-HER2A	2.118	0.360655	-0.535596	-0.739716	-0.397293
HP-62356	Negative	Positive	Negative	Luminal A	non-HER2A	1.9	0.185277	0.112726	0.150515	0.217462
HP-62359	Negative	Negative	Negative	Basal-like	non-HER2A	1.442	-0.371658	-2.0031	-1.85697	-0.973718
HP-62360	Negative	Negative	Negative	Basal-like	non-HER2A	1.796	0.00696789	-0.970756	-0.891574	-0.856812
HP-62361	Negative	Negative	Negative	Basal-like	non-HER2A	1.23	-0.823853	-2.07797	-2.25407	-1.9378
HP-62362	Negative	Negative	Negative	Basal-like	non-HER2A	3.32	0.754762	-1.15794	-1.32275	-1.03875
HP-62364	Negative	Negative	Positive	HER2E	HER2A	6.721	1.8251	-1.32537	-1.60158	-0.578094
HP-62365	Negative	Negative	Positive	HER2E	non-HER2A	4.462	1.00253	-1.02297	-1.02297	-0.328158
HP-62366	Positive	Negative	Negative	Luminal A	non-HER2A	3.159	-0.0625984	-0.202777	-0.294548	0.238432
HP-62368	Positive	Positive	Negative	Luminal A	non-HER2A	1.872	-0.477121	-0.954243	-0.352183	0.249877
HP-62369	Positive	Positive	Negative	Luminal A	non-HER2A	2.079	0.237452	0.702129	0.55296	-0.300122
HP-62370	Positive	Positive	Positive	Luminal B	HER2A	10.043	1.33692	0.055407	-0.618009	0.105095
HP-62371	Negative	Negative	Negative	Basal-like	non-HER2A	1.493	0.282286	-1.29569	-1.6202	-1.23202
HP-62372	Negative	Negative	Negative	Basal-like	non-HER2A	1.239	-0.0683631	-0.639754	-0.639754	-0.601966
HP-62373	Positive	Positive	Negative	Luminal A	non-HER2A	2.17	-0.272034	-0.028996	0.125906	0.381178
HP-62374	Negative	Negative	Positive	HER2E	HER2A	8.87	1.33247	-1.4467	-1.63576	-0.250639
HP-62375	Positive	Positive	Negative	Luminal A	non-HER2A	1.652	0.304978	-0.162823	-0.251513	-0.0754217
HP-62376	Positive	Negative	Negative	Luminal A	non-HER2A	1.505	0.761365	0.770161	-0.876569	0.226093
HP-62377	Negative	Negative	Positive	HER2E	HER2A	7.122	1.64893	-1.1089	-0.912608	0.336034
HP-62378	Positive	Positive	Negative	Luminal A	non-HER2A	1.721	0.255716	0.235646	-0.21034	-0.231324
HP-62380	Positive	Positive	Negative	Luminal A	non-HER2A	1.38	0.519488	0.49363	0.1327	0.0943553
HP-62381	Positive	Positive	Negative	Luminal A	non-HER2A	1.667	0.242222	0.352089	0.0986915	-0.046574
HP-62382	Negative	Negative	Negative	Luminal A	non-HER2A	1.974	0.236272	-0.443924	-0.7982	0.021916
HP-62521	Positive	Positive	Negative	Luminal A	non-HER2A	1.889	-0.396973	-0.0611807	-0.220882	-0.0959428
HP-62522	Positive	Positive	Negative	Luminal A	non-HER2A	1.46	-0.2007	0.30445	0.30445	0.276421
HP-62528	Positive	Positive	Negative	Luminal B	non-HER2A	1.406	0.105867	0.0817604	-0.00704551	-0.329265
HP-62529	Negative	Negative	Positive	Luminal A	HER2A	13.162	-0.251233	-0.120061	0.0881898	-0.386671
HP-62530	Positive	Positive	Negative	HER2E	non-HER2A	1.796	1.28203	-1.2433	-1.36434	-0.335829
HP-62531	Negative	Negative	Positive	Basal-like	non-HER2A	3.295	0.13993	-1.53611	-1.77915	-1.21488
HP-62534	Negative	Negative	Negative	Basal-like	non-HER2A	1.403	0.212174	-1.35687	-2.02587	-0.900933
HP-62535	Positive	Positive	Positive	Luminal A	HER2A	11.519	1.32399	0.489848	-0.298523	-0.165897
HP-62536	Negative	Negative	Negative	Basal-like	non-HER2A	1.498	0.173686	-1.32757	-1.09349	-0.871637
HP-62537	Negative	Positive	Negative	Luminal A	non-HER2A	1.617	0.104735	0.30103	0.162727	0.259637
HP-62538	Negative	Negative	Negative	Basal-like	non-HER2A	2.158	-0.0578085	-1.62433	-1.83261	-1.54861
HP-62540	Positive	Positive	Negative	Basal-like	non-HER2A	1.334	-0.0654917	-1.43412	-1.35115	-1.23575
HP-62542	Negative	Negative	Negative	Basal-like	non-HER2A	1.172	-0.118979	-1.70474	-1.9421	-1.72822
HP-62543	Negative	Negative	Negative	Basal-like	non-HER2A	1.794	-0.306267	-1.57511	-1.90833	-0.791821
HP-62544	Negative	Negative	Negative	Basal-like	non-HER2A	2.514	0.446022	-0.71748	-0.521185	-0.562578
HP-62545	Negative	Negative	Negative	Basal-like	non-HER2A	1.7	-0.467794	-1.4873	-1.87941	-1.73329
HP-62655	Negative	Negative	Negative	Basal-like	non-HER2A	2.35	0.485366	-1.20999	-1.55845	-0.523173
HP-62657	Negative	Negative	Positive	HER2E	HER2A	10.852	1.65411	-1.45112	-1.84906	-0.0468596
HP-62658	Negative	Negative	Positive	HER2E	HER2A	19.787	1.55611	-1.63273	-1.59931	-0.369804
HP-62659	Negative	Negative	Positive	Luminal A	HER2A	9.296	1.91134	-0.599878	-0.599878	-0.0558095
HP-62661	Positive	Positive	Negative	Luminal A	non-HER2A	1.776	-0.252575	0.048455	0.127636	0.127636
HP-62662	Positive	Positive	Negative	Luminal A	non-HER2A	1.345	0.0561756	0.130635	0.151758	0.000545287
HP-62663	Negative	Negative	Negative	Basal-like	non-HER2A	1.856	-0.150023	-1.67344	-1.67344	-1.3909
HP-62666	Positive	Negative	Negative	Luminal B	non-HER2A	2.845	0.484669	0.719162	-1.23523	-0.16404
HP-62668	Positive	Positive	Negative	Luminal A	non-HER2A	1.621	0.418475	0.0854938	0.289614	0.00462813
HP-62669	Negative	Negative	Negative	Basal-like	non-HER2A	2.029	-0.207912	-1.86497	-1.78579	-1.17774
HP-62670	Positive	Positive	Positive	Luminal A	non-HER2A	3.375	0.734174	0.504355	-0.557629	0.132366
HP-62671	Positive	Positive	Negative	Luminal A	non-HER2A	2.325	0.345381	0.283572	0.041239	-0.289379
HP-62673	Positive	Negative	Negative	Luminal B	non-HER2A	2.305	-0.252496	-0.100284	-1.6295	-1.11176
HP-62674	Positive	Positive	Negative	Luminal A	non-HER2A	2.335	0.707363	0.627836	-0.308097	0.248869
HP-62677	Positive	Positive	Negative	Luminal A	non-HER2A	2.243	0.424168	-0.459787	0.286947	-0.00761552
HP-62678	Positive	Negative	NA	Luminal B	HER2A	13.629	1.43807	-0.517063	-1.75761	0.0641194
HP-62679	Positive	Positive	Negative	Luminal A	non-HER2A	1.288	0.349485	0.428666	-0.173394	0.278904
HP-62683	Positive	Positive	Negative	Luminal A	non-HER2A	2.093	0.37981	0.278929	-0.0949819	-0.0838659
HP-62684	Positive	Positive	Positive	Luminal B	HER2A	21.735	1.46054	-0.485995	-0.560213	-0.149819
HP-62687	Positive	Negative	Negative	Luminal B	non-HER2A	1.523	0.156675	0.0641847	-2.06256	-0.355937
HP-62689	Negative	Negative	Positive	Basal-like	HER2A	14.709	-0.002131	-0.447068	-0.894226	-0.389076
HP-62691	Positive	Positive	NA	Luminal A	non-HER2A	2.404	0.590533	-0.202897	-0.957925	0.143211
HP-62692	Negative	Negative	Positive	HER2E	HER2A	16.498	1.60554	-0.913521	-1.33949	-0.084217
HP-62694	Positive	Positive	Negative	Luminal A	non-HER2A	1.5455	0.239849	0.523846	0.028996	0.426936
HP-62695	Negative	Negative	Negative	Basal-like	non-HER2A	2.174	-0.437568	-1.24743	-1.74476	-0.744758
HP-62696	Positive	Positive	Negative	Luminal A	non-HER2A	1.751	0.653948	0.974722	-0.502399	-0.104459
HP-62701	Positive	Positive	Negative	Luminal A	non-HER2A	1.519	0.0228787	0.485277	-0.375061	0.365301
HP-62703	Positive	Positive	Negative	Luminal A	non-HER2A	1.578	0.400816	0.377335	-0.137575	-0.275877
HP-62704	Positive	Positive	Positive	Luminal A	non-HER2A	2.243	0.97053	0.341031	-0.0206963	-0.242545
HP-63374	Positive	Positive	Negative	Luminal A	non-HER2A	1.303	0.0464562	0.237087	-0.0672809	0.313712
HP-63377	Positive	Negative	Negative	Luminal B	non-HER2A	1.496	-0.266243	0.581984	-2.13016	-0.179796
HP-63378	Negative	Negative	Negative	Basal-like	non-HER2A	1.714	0.171616	-1.53681	-1.47611	-1.29377
HP-63379	Negative	Negative	Negative	Basal-like	non-HER2A	2.089	-0.198034	-1.69358	-1.99461	-0.867503
HP-63380	Positive	Negative	Negative	Luminal B	non-HER2A	1.467	-0.15459	0.38055	-1.913	-1.17263
HP-63381	Negative	Positive	Negative	Luminal A	non-HER2A	1.702	0.476314	0.832746	0.524467	-0.0960391
HP-63382	Negative	Negative	Negative	Basal-like	non-HER2A	1.862	-0.341024	-0.802118	-1.46488	-1.31875
HP-63383	Positive	Positive	Negative	Luminal B	non-HER2A	1.132	-0.29187	0.191458	-1.54417	-0.300913
HP-63384	Negative	Negative	Negative	Basal-like	non-HER2A	1.874	-0.330103	-1.34714	-1.67813	-1.34714
HP-63385	Positive	Positive	Positive	Luminal A	HER2A	7.073	0.997618	-0.0945281	-0.0567396	-0.0945281
HP-63388	Positive	Positive	Negative	Luminal A	non-HER2A	1.772	-0.14232	0.748536	-0.397592	0.380559
HP-63389	Positive	Negative	Positive	Basal-like	HER2A	6.403	0.995866	-0.736527	-1.24841	-1.03756
HP-63391	Positive	Positive	Negative	Luminal A	non-HER2A	2.005	0.410666	0.149367	-0.529281	0.280759
HP-63392	Positive	Positive	Negative	Luminal A	non-HER2A	1.977	0.0237005	-0.294314	-0.132538	-0.351101
HP-63393	Negative	Negative	Positive	HER2E	non-HER2A	1.596	0.187915	-1.28557	-1.06645	-0.0961165
HP-63394	Negative	Negative	Negative	Basal-like	non-HER2A	4.07	0.0454354	-1.93941	-2.08554	-1.41344
HP-63395	Negative	Negative	Negative	Basal-like	non-HER2A	1.912	-0.136415	-1.30211	-1.79347	-1.22527
HP-63396	Negative	Negative	Positive	HER2E	HER2A	8.782	1.67492	-1.66776	-1.9108	-0.10166
HP-63397	Positive	Positive	Positive	Luminal A	non-HER2A	1.488	0.358239	0.466848	-0.143662	0.537039
HP-63399	Negative	Positive	Negative	Luminal A	non-HER2A	1.371	0.362753	0.458222	0.0193333	-0.000637731
HP-63400	Negative	Positive	Negative	Luminal B	non-HER2A	1.932	-0.279714	-0.50405	-0.429237	-0.317871
HP-63401	Positive	Positive	Negative	Luminal A	non-HER2A	1.47	0.486001	0.476214	0.353058	-0.0534543
HP-63402	Positive	Negative	Negative	Luminal B	non-HER2A	1.441	-0.0313318	0.450209	-1.57787	-0.162233
HP-63403	Positive	Positive	Negative	Luminal A	non-HER2A	1.798	0.34303	0.250809	-0.0155605	-0.277382
HP-63404	Positive	Negative	Negative	Luminal B	non-HER2A	1.281	-0.355945	0.376927	-0.928902	-0.742966
HP-63405	Negative	Negative	Negative	Basal-like	non-HER2A	1.149	-0.0839862	-1.3621	-1.48704	-1.11907
HP-63406	Positive	Positive	Negative	Luminal A	non-HER2A	1.86	0.44723	0.740671	-0.988284	-0.435121
HP-63407	Negative	Negative	Negative	Basal-like	non-HER2A	1.472	-0.230372	-1.32123	-2.19213	-1.83311
HP-63408	Positive	Positive	Positive	Luminal B	HER2A	5.246	0.839957	-0.250109	-1.04742	-0.462005
HP-63409	Negative	Negative	Negative	Basal-like	non-HER2A	1.982	-0.794799	-1.92149	-2.26672	-2.01491
HP-63411	Negative	Negative	Negative	Basal-like	non-HER2A	1.589	-1.15666	-2.21236	-2.04396	-2.01399
HP-63412	Positive	Negative	Negative	Luminal B	non-HER2A	1.021	-0.166678	0.0327695	-1.97683	-0.24681
HP-63413	Positive	Positive	Negative	Luminal B	non-HER2A	1.908	0.199994	0.255809	-0.638638	-0.870587
HP-63415	Positive	Positive	Negative	Luminal A	non-HER2A	1.789	0.195569	0.208137	0.262516	-0.104711
HP-63416	Negative	Negative	Negative	HER2E	non-HER2A	1.631	0.0248806	-1.53026	-1.48284	-0.789898
HP-63417	Positive	Positive	Negative	Luminal B	non-HER2A	2.476	-0.245404	0.284917	-0.538465	-0.302121
HP-63418	Positive	Positive	Negative	Luminal A	non-HER2A	2.196	0.444883	-0.00933946	-0.527001	-0.141778
HP-63419	Negative	Negative	Negative	Basal-like	non-HER2A	1.937	-0.0680391	-1.70653	-2.25744	-1.64348
HP-63420	Positive	Positive	Negative	Luminal B	non-HER2A	1.414	0.0144672	0.363261	-0.563266	-0.710748
HP-63421	Positive	Positive	Negative	Luminal A	non-HER2A	1.59	0.102166	-0.296743	-0.488706	-0.200804
HP-63422	Negative	Negative	Positive	HER2E	HER2A	18.311	1.40827	-1.49766	-1.88136	-0.550551
HP-63423	Negative	Negative	Negative	Basal-like	non-HER2A	1.945	0.117525	-1.50649	-1.6591	-1.05704
HP-63464	Positive	Positive	Negative	Luminal A	non-HER2A	2.442	0.635626	0.860759	-0.420787	0.24561
HP-63465	Positive	Positive	Negative	Luminal A	non-HER2A	1.551	0.585714	0.918228	-0.45127	0.267557
HP-63469	Positive	Positive	Negative	Luminal A	non-HER2A	1.966	0.492106	0.752488	-0.577418	0.0824451
HP-63470	Positive	Positive	Negative	Luminal A	non-HER2A	1.673	0.637748	0.589131	-0.822884	0.00357147
HP-63471	Negative	Negative	Negative	Basal-like	non-HER2A	1.78	0.107595	-1.13956	-1.31565	-0.988292
HP-63472	Negative	Negative	Negative	Basal-like	non-HER2A	1.527	-0.468076	-2.07517	-2.07517	-1.83629
HP-63474	Positive	Positive	Negative	Luminal A	non-HER2A	2.471	0.812002	0.669777	-0.225317	0.335527
HP-63475	Positive	Positive	Negative	Luminal B	HER2A	6.916	1.03524	0.525072	-0.223329	-0.555173
HP-63479	Negative	Negative	Negative	Basal-like	non-HER2A	1.987	-0.0186956	-1.28926	-1.66668	-1.4189
HP-63480	Negative	Negative	Negative	Basal-like	non-HER2A	1.22	-0.451295	-1.23967	-1.04337	-1.00558
HP-63481	Negative	Negative	Negative	Basal-like	non-HER2A	1.182	-0.461781	-1.76009	-1.88503	-1.81808
HP-63482	Negative	Negative	Negative	HER2E	non-HER2A	1.995	0.223581	-1.26953	-1.32752	-0.161894
HP-63483	Positive	Positive	Negative	Luminal A	non-HER2A	1.637	0.784614	0.638251	1.05247	0.211461
HP-63484	Negative	Negative	Negative	HER2E	non-HER2A	1.665	0.168755	-0.687283	-1.0205	0.270393
HP-63485	Negative	Negative	Negative	Basal-like	non-HER2A	1.563	0.262841	-1.8712	-2.14996	-1.78823
HP-63486	Positive	Negative	Negative	Luminal B	non-HER2A	1.929	0.238564	-0.15122	-0.623321	-0.743296
HP-63487	Negative	Negative	Negative	Basal-like	non-HER2A	1.678	0.0567271	-1.424	-1.02606	-1.151
HP-63488	Positive	Positive	Negative	Luminal A	non-HER2A	1.866	0.551331	0.201996	0.32373	0.0854909
HP-63490	Negative	Negative	Positive	HER2E	HER2A	17.071	1.61868	-1.2643	-1.48615	-0.334879
HP-63491	Negative	Negative	Negative	Basal-like	non-HER2A	1.689	-0.26565	-1.59244	-1.61726	-1.43274
HP-63494	Negative	Negative	Negative	Basal-like	non-HER2A	1.242	0.0841289	-1.28337	-1.69834	-0.78453
HP-63495	Negative	Negative	Negative	Basal-like	non-HER2A	1.513	-0.559962	-1.58799	-1.58799	-1.46305
HP-63498	Negative	Negative	Negative	Basal-like	non-HER2A	1.781	-0.360256	-1.53635	-1.93429	-1.52211
HP-63500	Positive	Negative	Negative	Luminal A	non-HER2A	1.573	0.571753	0.311197	-0.123863	0.0499952
HP-63501	Negative	Negative	Negative	Basal-like	non-HER2A	2.088	-0.305987	-1.13894	-2.04972	-1.5726
HP-63502	Negative	Negative	Negative	Basal-like	non-HER2A	1.617	0.0306482	-1.66333	-1.73028	-1.42925
HP-63505	Positive	Positive	Negative	Luminal A	non-HER2A	1.802	0.377023	0.822651	0.188375	0.366777
HP-63506	Positive	Positive	Negative	Luminal A	non-HER2A	1.983	0.531061	0.341086	-0.475524	0.161298
HP-63507	Positive	Positive	Negative	Basal-like	non-HER2A	1.055	0.135739	-1.70867	-1.70867	-1.43246
HP-63510	Positive	Positive	Negative	Luminal A	non-HER2A	1.323	0.0669468	0.378196	0.263241	-0.176091
HP-63511	Positive	Positive	Negative	Luminal A	non-HER2A	1.366	0.224694	0.380891	-0.425289	-0.647138
HP-63512	Negative	Negative	Negative	Basal-like	non-HER2A	2.046	0.27469	-1.06356	-1.43922	-1.19618
HP-63513	Positive	Positive	Negative	Luminal A	non-HER2A	1.981	0.717182	0.404542	0.788127	-0.110563
HP-64219	Positive	Positive	Negative	Luminal A	non-HER2A	1.436	0.431193	0.202714	-0.184231	-0.00813935
HP-64220	Positive	Positive	Negative	Luminal A	non-HER2A	2.048	0.647768	0.340664	0.305647	0.27828
HP-64221	Positive	Positive	Negative	Luminal A	non-HER2A	2.391	0.500828	-0.0874433	0.099929	-0.0287376
HP-64222	Positive	Positive	Negative	Luminal A	non-HER2A	1.209	-0.247425	0.436822	-0.372364	-0.0713338
HP-64223	Negative	Negative	Negative	Basal-like	non-HER2A	1.966	0.0473581	-1.16424	-1.57441	-1.34033
HP-64224	Positive	Positive	Negative	Luminal B	non-HER2A	1.274	0.0886359	-0.0488492	-0.678738	-0.00882006
HP-64225	Positive	Negative	Negative	Luminal A	non-HER2A	3.206	0.896129	0.215257	-0.997818	0.104845
HP-64226	Positive	Positive	Negative	Luminal A	non-HER2A	1.801	0.106862	0.387689	-0.863949	-0.249052
HP-64227	Negative	Negative	Negative	Basal-like	non-HER2A	1.603	0.0300758	-1.04911	-1.17404	-0.505037
HP-64228	Positive	Negative	Negative	Luminal A	non-HER2A	3.451	0.888119	0.369911	-1.11743	-0.290429
HP-64229	Negative	Negative	Negative	Basal-like	non-HER2A	1.823	-0.375746	-1.42413	-1.75735	-0.850101
HP-64230	Positive	Positive	Negative	Luminal B	non-HER2A	1.9	0.362742	0.376181	-1.10214	-0.11314
HP-64231	Positive	Positive	Negative	Luminal A	non-HER2A	3.23	0.201671	0.778069	0.00740594	0.261439
HP-64232	Negative	Negative	Negative	Basal-like	non-HER2A	2.471	0.091467	-1.31629	-1.86036	-1.20714
HP-64233	Positive	Positive	Negative	Luminal A	non-HER2A	1.454	0.773472	0.599794	0.427299	0.231989
HP-64234	Positive	Negative	Negative	Luminal A	non-HER2A	1.584	0.389325	0.813594	0.179375	0.380181
HP-64235	Positive	Positive	Negative	Luminal A	non-HER2A	2.203	0.222515	0.061542	0.203649	-0.0646722
HP-64236	Positive	Positive	Negative	Luminal A	non-HER2A	1.313	0.389123	0.745542	-0.346476	0.251219
HP-64237	Positive	Negative	Negative	Luminal A	non-HER2A	1.665	0.093247	-0.321726	-0.418636	0.0584849
HP-64242	Positive	Positive	Negative	Luminal A	non-HER2A	1.979	0.665052	0.82896	0.925005	0.0789151
HP-64243	Positive	Positive	Negative	Luminal A	non-HER2A	2.357	0.189621	0.339723	-0.122017	-0.214771
HP-64246	Positive	Negative	Negative	Luminal A	non-HER2A	2.469	0.788623	0.297319	-0.155279	0.169367
HP-64247	Positive	Positive	Negative	Luminal A	non-HER2A	2.223	0.0947969	0.0278501	-0.18603	-0.625362
HP-64248	Positive	Positive	Negative	Luminal A	non-HER2A	1.699	0.347665	-0.0131336	0.0144499	0.0991637
HP-64249	Positive	Positive	Negative	Luminal A	non-HER2A	0.999	0.228499	0.965106	-0.00886151	0.326323
HP-64250	Negative	Negative	Positive	Luminal A	HER2A	17.507	0.0177257	-0.581383	-0.463181	-0.331973
HP-64251	Negative	Negative	Negative	Basal-like	non-HER2A	1.825	0.148256	-0.530041	-1.56676	-1.29206
HP-64252	Positive	Positive	Negative	Luminal B	non-HER2A	2.231	0.672059	0.431062	-0.886431	0.0797105
HP-64253	Positive	Positive	Negative	Luminal A	non-HER2A	1.839	0.472383	0.732847	0.0900477	-0.214187
HP-64255	Positive	Positive	Negative	Luminal A	non-HER2A	1.533	0.38603	0.10472	0.398588	-0.0188678
HP-64256	Positive	Positive	Negative	Luminal B	non-HER2A	1.421	0.0789364	0.326932	-0.122092	0.0580863
HP-64257	Negative	Negative	Negative	Luminal A	non-HER2A	1.655	0.301378	-0.397592	-0.397592	-0.193472
HP-64258	Positive	Positive	Negative	Luminal A	non-HER2A	1.402	-0.157197	0.143833	-0.106044	0.261932
HP-64260	Positive	Positive	Negative	Luminal A	non-HER2A	1.802	0.597506	0.682482	-0.452332	0.389778
HP-64261	Positive	Negative	Positive	Luminal A	non-HER2A	1.467	-0.0149816	0.16111	-0.206867	-0.206867
HP-64262	Negative	Negative	Negative	Basal-like	non-HER2A	1.442	-0.202908	-1.5266	-1.5266	-1.46861
HP-64263	Positive	Positive	Negative	Luminal B	non-HER2A	1.948	0.648921	0.737089	-0.397847	0.211587
HP-64264	Negative	Negative	Negative	Basal-like	non-HER2A	1.506	-0.238292	-1.1796	-1.72778	-1.38536
HP-64267	Positive	Positive	Negative	Luminal A	non-HER2A	1.786	0.279314	0.380558	-0.326606	-0.0360417
HP-64352	Positive	Positive	Negative	Luminal A	non-HER2A	1.94	0.664833	0.500773	0.466209	0.0895802
HP-64354	Negative	Negative	Negative	Basal-like	non-HER2A	1.739	0.0941753	-1.40522	-1.83888	-1.4287
HP-64356	Negative	Negative	Negative	Basal-like	non-HER2A	1.454	-0.148085	-1.38659	-1.3488	-1.10576
HP-64357	Positive	Negative	Positive	Luminal A	HER2A	5.515	1.59125	-0.0264085	-0.924951	0.181505
HP-64358	Positive	Negative	Negative	Luminal A	non-HER2A	2.187	0.144475	0.0742948	-0.975191	-0.0168079
HP-64359	Negative	Negative	Positive	HER2E	non-HER2A	1.764	0.539386	-1.48151	-1.72455	0.0158164
HP-64360	Positive	Negative	Positive	Luminal B	HER2A	24.438	1.66169	0.154058	-1.08716	-0.280679
HP-64361	Positive	Positive	Negative	Luminal A	non-HER2A	1.287	0.00447742	0.335471	0.0624694	-0.141651
HP-64363	Positive	Negative	Negative	Basal-like	non-HER2A	2.172	-0.0505757	-0.411191	-1.68303	-1.30282
HP-64365	Positive	Positive	Negative	Luminal A	non-HER2A	1.521	0.243441	0.501699	0.36794	0.265161
HP-64367	Positive	Positive	Negative	Luminal A	non-HER2A	1.577	0.330684	0.233652	0.0596818	0.0623934
HP-64368	Negative	Negative	Negative	Basal-like	non-HER2A	1.794	-0.351904	-1.37874	-2.2586	-1.84642
HP-64369	Positive	Positive	Negative	Luminal A	non-HER2A	1.867	-0.356256	0.164134	0.0728037	-0.122173
HP-64370	Positive	Positive	Negative	Luminal A	non-HER2A	1.604	0.333215	0.946754	0.187087	0.391207
HP-64371	Negative	Negative	Negative	Basal-like	non-HER2A	2.25	-0.178765	-1.23887	-2.00366	-1.84093
HP-64372	Positive	Negative	Negative	Luminal A	non-HER2A	1.269	0.139029	0.678941	-0.23543	0.017295
HP-64373	Positive	Positive	Negative	Luminal A	non-HER2A	1.921	0.393553	0.0925231	0.0925231	-0.0255763
HP-64374	Positive	Positive	Negative	Luminal A	non-HER2A	1.502	0.0545722	-0.2007	-0.121519	0.179511
HP-64375	Positive	Positive	Negative	Luminal B	non-HER2A	1.488	0.118775	0.0963706	-0.426508	0.242499
HP-64378	Positive	Positive	Negative	Luminal A	non-HER2A	1.336	-0.382958	0.0149816	-0.206867	-0.0471663
HP-64379	Positive	Negative	Negative	Luminal B	non-HER2A	2.971	0.0690385	0.231227	-1.80932	-0.509843
HP-64380	Negative	Negative	Negative	Basal-like	non-HER2A	1.442	0.0523068	-0.997465	-1.44462	-1.16587
HP-64381	Positive	Negative	Negative	Luminal A	non-HER2A	2.882	0.376444	0.581638	-0.229937	0.0533638
HP-64382	Positive	Positive	Negative	Luminal A	non-HER2A	0.754	0.0363002	0.203101	-0.391972	-0.206738
HP-64383	Positive	Positive	Negative	Luminal A	non-HER2A	1.888	0.438878	0.488304	-0.589151	0.283144
HP-64385	Positive	Positive	Negative	Luminal A	non-HER2A	1.397	0.220609	0.264713	0.469648	0.136657
HP-64386	Negative	Negative	Negative	Basal-like	non-HER2A	1.827	-0.0118473	-1.59668	-1.77277	-1.0738
HP-64387	Negative	Negative	Positive	HER2E	non-HER2A	2.63	1.24756	-1.21434	-1.55676	-0.679773
HP-64388	Positive	Negative	Negative	Luminal B	non-HER2A	1.091	-0.199357	0.389914	-1.29433	-0.558379
HP-64389	Negative	Negative	Negative	Basal-like	non-HER2A	1.338	0.0175288	-0.863781	-1.14633	-0.706995
HP-64392	Positive	Positive	Negative	Luminal A	non-HER2A	1.071	0.389778	0.372416	0.234037	-0.102877
HP-64393	Negative	Negative	Positive	HER2E	HER2A	7.047	1.12166	-1.11289	-1.39273	-0.331137
HP-64394	Positive	Positive	Negative	Luminal A	non-HER2A	1.935	0.699771	0.305624	0.0419628	0.110228
HP-64395	Negative	Negative	Negative	Basal-like	non-HER2A	1.854	-0.0629136	-0.871028	-1.12405	-0.912421
HP-64633	Positive	Positive	Negative	Luminal A	non-HER2A	0.993	0.372951	0.225348	-0.795841	0.0934603
HP-64634	Negative	Negative	Positive	HER2E	non-HER2A	3.893	1.60353	-0.619739	-1.16381	-0.132399
HP-64635	Positive	Positive	Negative	Luminal A	non-HER2A	1.719	0.349978	0.0691513	-0.0179988	0.141702
HP-64636	Negative	Negative	Positive	Basal-like	non-HER2A	2.966	0.613895	-0.93429	-0.93429	-0.566313
HP-64637	Negative	Negative	Negative	Basal-like	non-HER2A	1.738	-0.220024	-1.32808	-1.62911	-1.51517
HP-64638	Positive	Positive	Negative	Luminal A	non-HER2A	1.51	0.497438	0.699982	-0.0861384	0.364025
HP-64639	Positive	Positive	Negative	Luminal A	non-HER2A	1.438	0.380211	0.486667	-0.39794	-0.09691
HP-64644	Negative	Negative	Negative	Luminal A	non-HER2A	1.597	-0.971004	-0.0415851	-0.396973	-0.175124
HP-64646	Negative	Negative	Negative	Basal-like	non-HER2A	1.451	-0.245516	-0.940693	-1.60345	-1.18848
HP-64647	Negative	Negative	Negative	Basal-like	non-HER2A	1.909	-0.322092	-0.162391	-0.322092	-0.799213
HP-64650	Positive	Positive	Positive	Luminal B	non-HER2A	3.892	0.674713	0.407046	-0.313879	-0.18894
HP-64651	Positive	Positive	Negative	Luminal A	non-HER2A	1.859	0.380559	0.350596	-0.193472	0.204468
HP-64652	Positive	Positive	Negative	Luminal A	non-HER2A	1.515	0.505834	0.800333	0.512268	0.247961
HP-64653	Positive	Positive	Positive	HER2E	non-HER2A	4.38	1.11343	-0.320924	-1.30162	-0.313099
HP-64654	Positive	Positive	Negative	Luminal A	non-HER2A	2.024	0.0255763	0.372364	-0.451545	0.185277
HP-64656	Positive	Positive	Negative	Luminal A	non-HER2A	2.497	0.375853	0.0893705	-0.202225	-0.194822
HP-64657	Negative	Positive	Negative	Basal-like	non-HER2A	1.688	0.0837455	-0.71996	-0.916254	-0.460323
HP-64658	Positive	Positive	Negative	Luminal A	non-HER2A	1.266	0.390157	0.248405	-0.0603121	0.142513
HP-64660	Positive	Positive	Negative	Luminal A	non-HER2A	1.68	0.352421	0.387803	0.236978	-0.120116
HP-64661	Positive	Positive	Negative	Luminal A	non-HER2A	1.329	-0.0439776	0.558082	-0.0439776	0.110924
HP-64662	Positive	Positive	Negative	Luminal B	non-HER2A	1.16	0.0840538	0.97499	-0.325316	0.218752
HP-64663	Positive	Positive	Negative	Luminal A	non-HER2A	1.835	0.213858	1.08412	-0.292315	0.191581
HP-64664	Positive	Positive	Negative	Luminal B	non-HER2A	1.901	0.0943251	0.458254	-0.947068	0.088648
HP-64665	Negative	Negative	Negative	Basal-like	non-HER2A	2.261	0.0658646	-2.02732	-2.20341	-0.805475
HP-64666	Positive	Positive	Negative	Luminal A	non-HER2A	1.542	0.13029	0.216408	0.469298	-0.124529
HP-64667	Positive	Positive	Negative	Luminal A	non-HER2A	4.641	0.48813	0.407749	0.053082	-0.00578466
HP-64668	Positive	Negative	Negative	Luminal B	non-HER2A	1.481	0.134021	0.332336	-1.28095	-2.7e-05
HP-64669	Positive	Positive	Negative	Luminal A	non-HER2A	1.922	0.406367	0.554921	-0.301204	-0.0758944
HP-64670	Positive	Positive	Negative	Luminal A	HER2A	6.619	0.313314	-0.142618	0.229768	0.374012
HP-64671	Negative	Negative	Negative	Basal-like	non-HER2A	1.568	-0.295272	-1.66352	-1.82113	-1.26182
HP-64672	Positive	Positive	Negative	Luminal A	non-HER2A	1.636	0.384015	0.342853	0.193091	0.0852889
HP-64674	Positive	Positive	Negative	Luminal B	non-HER2A	1.756	0.115503	0.773749	0.0862481	-0.056747
HP-64675	Negative	Negative	Negative	Luminal A	non-HER2A	1.685	0.420843	-0.278127	-0.422034	0.0116215
HP-64677	Positive	Positive	Negative	Luminal A	non-HER2A	1.815	0.374379	0.355629	0.576199	0.0545991
HP-64678	Positive	Positive	Negative	Luminal A	non-HER2A	1.844	0.0914653	0.550103	-0.209565	0.0334734
HP-64679	Negative	Negative	Negative	Basal-like	non-HER2A	1.319	-0.291764	-1.55984	-1.82868	-1.44333
HP-64680	Positive	Positive	Negative	Luminal A	non-HER2A	1.354	0.0195026	0.673146	-0.853624	-0.140414
HP-64681	Negative	Negative	Positive	Basal-like	non-HER2A	4.469	0.893981	-1.09229	-1.34757	-0.816087
HP-64682	Negative	Negative	Positive	Basal-like	non-HER2A	1.332	0.0745952	-1.1572	-1.23183	-1.00459
HP-65102	Positive	Positive	Negative	Luminal A	non-HER2A	2.436	0.909774	1.01892	-0.145024	0.267639
HP-65103	Positive	Positive	Negative	Luminal A	non-HER2A	2.088	0.663777	0.322302	0.114281	0.0320307
HP-65104	Positive	Positive	Negative	Luminal A	non-HER2A	1.791	0.590402	1.18679	-0.274899	0.266204
HP-65106	Positive	Positive	Negative	Luminal A	non-HER2A	1.678	0.296038	0.275353	-0.0152113	0.264629
HP-65107	Positive	Positive	Negative	Luminal B	non-HER2A	1.864	0.275169	0.0417707	0.608555	-0.447849
HP-65108	Positive	Positive	Negative	Luminal A	non-HER2A	1.459	0.222816	-0.133731	0.028996	0.0801485
HP-65109	Positive	Positive	Negative	Luminal A	non-HER2A	1.945	0.09691	-0.30103	-0.20412	-0.20412
HP-65110	Positive	Positive	Negative	Luminal A	non-HER2A	1.788	0.386945	0.386945	0	-0.0579919
HP-65111	Positive	Negative	Positive	Luminal A	non-HER2A	4.968	1.37286	-0.27398	-0.833288	-0.0374082
HP-65112	Negative	Negative	Positive	HER2E	HER2A	7.308	1.1576	-0.486904	-1.19031	-0.256325
HP-65113	Positive	Negative	Negative	Luminal A	non-HER2A	1.568	0.389076	0.122808	-0.0880456	0.154992
HP-65114	Negative	Negative	Negative	Basal-like	non-HER2A	1.65	-0.4163	-1.37618	-1.67721	-1.4163
HP-65115	Positive	Positive	Negative	Luminal A	non-HER2A	1.666	0.49325	0.49325	0.30526	0.260841
HP-65116	Positive	Positive	Negative	Luminal A	non-HER2A	1.523	0.167219	0.0496623	-0.0170135	0.282116
HP-65117	Positive	Positive	Negative	Luminal A	non-HER2A	1.827	0.492976	0.189368	-0.083633	0.294473
HP-65118	Negative	Negative	Negative	Basal-like	non-HER2A	1.736	-0.236373	-1.47453	-1.72231	-1.33111
HP-65120	Positive	Positive	Negative	Luminal A	non-HER2A	1.648	0.405881	0.43417	0.374723	0.0736927
HP-65121	Positive	Positive	Negative	Luminal A	non-HER2A	3.243	1.0801	0.729242	-0.755058	-0.472512
HP-65122	Negative	Negative	Negative	Basal-like	non-HER2A	1.824	-0.343632	-1.22445	-1.41827	-0.902227
HP-65123	Negative	Negative	Negative	HER2E	non-HER2A	1.763	0.153885	-1.07975	-1.50571	0.134435
HP-65124	Positive	Positive	Negative	Luminal B	non-HER2A	3.149	0.5522	1.18023	0.34294	0.122989
HP-65125	Positive	Positive	Negative	Luminal A	non-HER2A	1.846	0.143838	0.103125	0.0966752	-0.030798
HP-65126	Positive	Positive	Negative	Luminal A	non-HER2A	1.775	-0.30103	0.0413927	-0.09691	0.431364
HP-65127	Negative	Negative	Negative	Luminal A	non-HER2A	2.054	0.398848	0.40927	0.061416	-0.173006
HP-65128	Positive	Positive	Negative	Luminal A	non-HER2A	1.913	0.607214	0.683876	0.735905	0.208331
HP-65129	Positive	Positive	Negative	Luminal A	non-HER2A	2.11	0.363209	-0.00972874	0.0767306	0.1435
HP-65130	Positive	Positive	Negative	HER2E	non-HER2A	1.629	-0.0333641	-0.705421	-1.34616	-0.478538
HP-65131	Positive	Positive	Negative	Luminal A	non-HER2A	1.646	0.128763	-0.0605251	-0.465217	-0.10883
HP-65132	Positive	Positive	Negative	Luminal A	non-HER2A	1.458	0.502116	0.00151323	0.59443	0.274514
HP-65133	Positive	Positive	Negative	Luminal A	non-HER2A	1.809	0.447158	0.350248	0.049218	-0.119186
HP-65134	Positive	Positive	Negative	Luminal A	non-HER2A	1.868	0.343087	0.441042	-0.79784	0.164371
HP-65135	Positive	Positive	Negative	Luminal A	non-HER2A	1.612	0.438147	0.15128	-0.689198	0.107325
HP-65137	Positive	Positive	Negative	Luminal A	non-HER2A	1.47	0.771067	0.68089	0.184247	0.136822
HP-65138	Positive	Positive	Negative	Luminal A	non-HER2A	1.809	0.395311	0.390246	0.0670066	0.09302
HP-65140	Positive	Positive	Negative	Luminal A	non-HER2A	1.699	0.911881	0.664271	-0.128603	0.297366
HP-65141	Positive	Negative	Positive	Luminal A	non-HER2A	2.277	0.616757	0.213737	-0.0624694	0.129416
HP-65142	Positive	Positive	Negative	Luminal A	non-HER2A	1.562	-0.09691	0.20412	0	0.20412
HP-65144	Positive	Positive	Negative	Luminal B	non-HER2A	2.028	0.108563	0.682752	-0.263467	-0.224981
HP-65145	Positive	Positive	Negative	Luminal B	non-HER2A	1.671	-1.09284	-1.03325	-1.00107	-1.32329
HP-65405	Positive	Positive	Negative	Luminal A	non-HER2A	1.874	0.485018	0.813107	-0.213952	0.190149
HP-65407	Positive	Positive	Negative	Luminal A	non-HER2A	1.455	0.367369	0.466921	-0.339025	0.0648641
HP-65409	Positive	Positive	Negative	Luminal A	non-HER2A	1.323	0.286346	0.226051	0.261523	0.353293
HP-65410	Positive	Positive	Negative	Luminal A	non-HER2A	2.25	0.515144	-0.247327	-0.504451	0.034818
HP-65411	Negative	Negative	Negative	Basal-like	non-HER2A	1.961	0.0290526	-0.822761	-1.086	-1.00682
HP-65413	Negative	Negative	Negative	Luminal A	non-HER2A	1.83	0.626775	0.0407688	-0.848533	-0.429404
HP-65414	Positive	Negative	Positive	Luminal B	non-HER2A	1.658	0.363746	0.348633	-0.575892	-0.186304
HP-65415	Positive	Negative	Negative	Luminal A	non-HER2A	2.054	0.728506	0.690204	-1.23717	-0.302668
HP-65416	Positive	Positive	Negative	Luminal A	non-HER2A	1.584	0.704694	0.693189	-0.11827	0.1921
HP-65417	Positive	Positive	Negative	Luminal B	non-HER2A	1.916	0.151089	0.247654	-0.913319	-0.275619
HP-65419	Positive	Positive	Positive	Luminal A	HER2A	6.854	1.30711	-0.253795	-0.870253	-0.228578
HP-65420	Positive	Negative	Negative	Luminal B	non-HER2A	1.937	-0.233059	-0.236755	-1.3507	-0.456752
HP-65436	Negative	Negative	Positive	HER2E	HER2A	7.059	1.24299	-0.943643	-1.26815	-0.213797
HP-65437	Positive	Positive	Negative	Luminal A	non-HER2A	1.55	0.545938	0.928322	-0.0642401	0.198256
HP-65442	Positive	Positive	Negative	Luminal A	non-HER2A	1.608	0.317318	0.779716	0.0807464	0.170611
HP-65443	Positive	Positive	Negative	Luminal B	non-HER2A	1.999	0.344606	0.0300565	-1.14262	-0.486573
HP-65444	Negative	Positive	Negative	Basal-like	non-HER2A	1.498	0.0622045	-1.68984	-1.59293	-1.51375
HP-65445	Negative	Negative	Negative	Luminal A	non-HER2A	1.36	0	-0.477121	-0.176091	0.367977
HP-65446	Positive	Positive	Positive	Luminal A	non-HER2A	2.18	0.466654	-0.224347	-0.721671	-0.288016
HP-65448	Positive	Positive	Negative	Luminal A	non-HER2A	1.918	0.678591	0.312168	0.194408	0.116648
HP-65449	Positive	Positive	Negative	Luminal A	non-HER2A	1.516	0.635576	0.939654	0.0395906	0.465559
HP-65452	Positive	Positive	Negative	Luminal A	non-HER2A	1.785	0.343792	0.794511	0.133811	-0.0605998
HP-65454	Positive	Positive	Negative	Luminal A	non-HER2A	2.149	0.53027	0.91741	-0.584627	-0.0568133
HP-65635	Negative	Negative	Negative	Basal-like	non-HER2A	2.169	-0.00927045	-1.45449	-1.48251	-1.29688
HP-65642	Positive	Negative	Positive	Luminal B	HER2A	8.451	1.33801	-0.226414	-1.22641	-0.494021
HP-65644	Positive	Positive	Negative	Luminal A	non-HER2A	1.331	0.121707	0.585863	-0.0673493	0.170012
HP-65647	Positive	Positive	Negative	Luminal B	non-HER2A	1.391	0.0833779	0.493364	-0.432767	-0.275644
HP-65648	Positive	Positive	Positive	Luminal A	non-HER2A	1.859	0.671704	0.517224	0.303728	0.24475
HP-65649	Positive	Positive	Negative	Luminal A	non-HER2A	2.775	0.467772	0.0569088	0.0326063	-0.129951
HP-65652	Positive	Negative	Positive	Luminal A	HER2A	7.77	1.86075	-0.89967	0.246458	0.30445
HP-65657	Positive	Positive	Negative	Luminal A	non-HER2A	2.359	0.425047	0.570268	-1.32793	0.0376894
HP-65658	Negative	Negative	Negative	Basal-like	non-HER2A	1.262	-0.0472094	-1.19894	-1.28609	-0.825361
HP-65659	Positive	Positive	Negative	Luminal A	non-HER2A	1.485	0.322552	0.348281	-1.00583	-0.0764086
HP-65660	Positive	Positive	Negative	Luminal A	non-HER2A	2.187	0.709744	0.966242	-0.583987	0.332467
HP-65661	Positive	Positive	Negative	Luminal A	non-HER2A	1.652	-0.5043	-0.124089	-0.20327	-0.0571421
HP-65662	Positive	Positive	Negative	Luminal A	non-HER2A	1.743	0.96267	0.220516	-1.24685	0.220516
HP-65663	Negative	Negative	Positive	Basal-like	non-HER2A	1.933	-0.0440418	-0.777774	-0.777774	-0.601683
HP-65666	Positive	Negative	Positive	Luminal B	HER2A	6.702	1.39576	0.37019	-0.778749	-0.196892
HP-65669	Positive	Positive	Negative	Luminal A	non-HER2A	1.846	0.299303	0.662241	0.499584	-0.172457
HP-65670	Negative	Negative	Negative	HER2E	non-HER2A	1.713	0.192557	-0.652541	-0.953571	-0.300359
HP-65672	Positive	Positive	Negative	Luminal A	non-HER2A	2.535	0.598899	0.776651	-0.299228	0.203447
HP-65673	Positive	Positive	Negative	Luminal A	non-HER2A	1.556	0.631056	0.125906	0.458344	0.186604
HP-65675	Positive	Positive	Negative	Luminal A	HER2A	7.769	0.572838	0.769769	0.377828	0.0752275
HP-65678	Negative	Negative	Negative	Basal-like	non-HER2A	3.29	0.0694954	-1.09486	-1.14061	-1.01568
HP-65680	Positive	Positive	Negative	Luminal B	non-HER2A	1.491	0.24313	0.684976	-1.18593	-0.800579
HP-65683	Positive	Negative	Negative	Luminal A	non-HER2A	1.679	0.46584	0.257125	-0.460731	-0.0347621
HP-65706	Negative	Negative	Positive	HER2E	HER2A	9.653	1.65363	-1.44237	-1.59213	-0.252036
HP-65708	Negative	Negative	Positive	HER2E	HER2A	8.939	1.38784	-1.56148	-1.66215	-0.397536
HP-65868	Positive	Positive	Negative	Luminal A	non-HER2A	1.963	0.234083	0.285236	0.196295	0.234083
HP-65870	Positive	Negative	Negative	Luminal A	non-HER2A	1.547	0.0450883	0.38088	-0.335123	0.0450883
HP-65872	Positive	Positive	Negative	Luminal A	non-HER2A	1.515	0.346118	0.453752	0.420752	0.0962408
HP-65874	Negative	Negative	Negative	HER2E	non-HER2A	1.139	0.248861	-1.20978	-1.20978	0.508309
HP-65878	Negative	Negative	Negative	Basal-like	non-HER2A	2.516	0.0170333	-0.0757207	-0.443697	-0.552842
HP-65884	Negative	Negative	Negative	Luminal A	non-HER2A	1.484	0.202288	0.185773	0.101512	0.136824
HP-65886	Positive	Positive	Negative	Basal-like	non-HER2A	1.073	-0.0727354	-1.05316	-2.12504	-1.19055
HP-65888	Negative	Negative	Negative	Basal-like	non-HER2A	1.252	0.107164	-1.11469	-1.83484	-1.4369
HP-65889	Negative	Negative	Negative	Luminal A	non-HER2A	1.36	0.205514	-0.220455	-0.957213	-0.326508
HP-65890	Positive	Positive	Negative	Basal-like	non-HER2A	2.062	-0.0878586	-0.978587	-1.82369	-0.93639
HP-65898	Positive	Positive	Negative	Luminal A	non-HER2A	1.216	0.431364	0.176091	0.113943	0.278754
HP-65899	Positive	Positive	Negative	Luminal A	non-HER2A	1.759	0.139189	0.158029	-0.116768	-0.278445
HP-65901	Positive	Positive	Negative	Luminal A	non-HER2A	1.72	0.762535	0.496016	0.0536564	0.229748
HP-65902	Positive	Positive	Negative	Luminal A	non-HER2A	1.939	0.357258	0.744251	-0.478619	0.0762621
HP-65903	Positive	Positive	Negative	Luminal A	non-HER2A	1.598	0.845098	0.30103	0	0
HP-65906	Positive	Positive	Negative	Luminal A	non-HER2A	1.893	0.563437	0.030798	-0.270232	0.135533
HP-65908	Positive	Positive	Negative	Luminal A	non-HER2A	1.848	0.700847	0.661653	0.105351	0.372522
HP-65911	Negative	Negative	Negative	Basal-like	non-HER2A	1.394	0.0900161	-1.01719	-1.01719	-0.636983
HP-65915	Positive	Positive	Negative	Luminal A	non-HER2A	1.803	0.38892	0.534861	0.0927903	0.067374
HP-66091	Positive	Positive	Negative	Luminal A	non-HER2A	1.555	0.606046	0.598558	0.435487	0.23683
HP-66094	Negative	Negative	Negative	Basal-like	non-HER2A	1.566	-0.0163573	-0.607422	-0.653179	-0.704332
HP-66098	Positive	Positive	Negative	Luminal A	non-HER2A	2.308	0.530754	0.686874	0.27156	0.280334
HP-66103	Positive	Positive	Negative	Basal-like	non-HER2A	1.81	-0.408914	-1.3727	-1.6457	-1.6457
HP-66106	Negative	Negative	Negative	Basal-like	non-HER2A	1.742	-0.107858	-1.6032	-1.36912	-1.30217
HP-66108	Negative	Negative	Negative	Basal-like	non-HER2A	1.071	0.135616	-0.408452	-0.454209	-0.454209
HP-66113	Positive	Negative	Negative	Luminal A	non-HER2A	1.061	-0.0255763	0.275454	-0.275454	-0.188304
HP-66114	Positive	Positive	Negative	Luminal A	non-HER2A	1.666	-0.372364	-0.0713338	0.104758	-0.0713338
HP-66119	Positive	Positive	Negative	Luminal B	non-HER2A	0.836	-0.29478	-0.469204	-0.52791	-0.351818
HP-66125	Positive	Positive	Negative	Luminal B	non-HER2A	2.311	0.113128	-0.531083	-0.764213	-0.57684
HP-66126	Positive	Positive	Negative	Luminal A	non-HER2A	2.083	0.537551	0.247951	-0.554219	-0.000764645
HP-66128	Negative	Negative	Negative	Luminal A	non-HER2A	1.388	0.0228787	-0.132023	-0.375061	0.10206
HP-66131	Negative	Negative	Positive	Luminal A	non-HER2A	4.88	0.278904	-0.349485	-0.048455	0.00269752
HP-66133	Positive	Positive	Negative	Luminal A	non-HER2A	1.79	0.389302	0.375061	-0.5	0.153213
HP-66134	Negative	Negative	Negative	Luminal A	non-HER2A	1.739	0.226999	-0.0228787	0.10206	0.253328
HP-66438	Negative	Negative	Negative	Basal-like	non-HER2A	1.476	-0.267173	-1.24268	-1.39162	-1.41182
HP-66439	Negative	Negative	Negative	HER2E	non-HER2A	3.262	0.955157	-1.456	-1.68448	0.402151
HP-66440	Positive	Positive	Negative	Luminal B	non-HER2A	1.96	0.202257	0.47931	-1.32039	-0.0753999
HP-66441	Positive	Positive	Negative	Luminal A	non-HER2A	2.26	0.615242	0.851833	-0.107236	-0.112406
HP-66442	Positive	Positive	Negative	Luminal A	non-HER2A	1.635	0.179226	-0.223794	-0.308114	0.0371192
HP-66443	Negative	Negative	Negative	Basal-like	non-HER2A	1.414	-0.378668	-1.26445	-1.62348	-0.877509
HP-66445	Positive	Positive	Negative	Luminal A	non-HER2A	1.683	-0.0569717	0.0891564	-0.454912	-0.153882
HP-66448	Positive	Positive	Negative	Luminal A	non-HER2A	1.777	0.0377886	-0.196295	0.134699	-0.196295
HP-66449	Negative	Negative	Negative	Basal-like	non-HER2A	1.392	0.0277587	-0.750393	-0.40797	-0.370181
HP-66451	Positive	Positive	Positive	Luminal A	HER2A	6.412	1.33318	-0.167566	-0.243954	-0.0907255
HP-66458	Positive	Positive	Negative	Luminal A	non-HER2A	2.01	-0.171614	0.159379	-0.171614	-0.0624694
HP-66459	Negative	Negative	Negative	HER2E	non-HER2A	1.998	0.738566	-0.946913	-1.5753	0.528502
HP-66460	Positive	Positive	Negative	Luminal A	non-HER2A	1.875	0.628427	0.580869	-0.411607	0.208712
HP-66461	Positive	Negative	Negative	Luminal A	non-HER2A	1.973	-0.0575243	-0.659584	-1.20751	0.00666854
HP-76497	Positive	Positive	Negative	Luminal B	non-HER2A	2.126	0.539611	-0.0642355	-0.524966	-0.181292
HP-76499	Positive	Positive	Negative	Luminal A	non-HER2A	1.89	0.274077	0.144443	-0.314194	0.104935
HP-76500	Negative	Negative	Negative	HER2E	non-HER2A	1.954	0.371809	-0.536676	-0.992608	0.0487849
HP-76501	Negative	Negative	Negative	Basal-like	non-HER2A	1.89	-0.17656	-1.45531	-1.63141	-1.27922
HP-76502	Positive	Positive	Negative	Luminal B	non-HER2A	2.486	0.0512499	0.101905	-0.618504	-0.320098
HP-76503	Negative	Negative	Negative	Basal-like	non-HER2A	1.706	-0.244764	-1.89045	-2.00243	-1.8179
HP-76504	Negative	Negative	Negative	Basal-like	non-HER2A	2.015	0.0123802	-1.27658	-1.89288	-1.74675
HP-76506	Positive	Positive	Negative	Luminal B	non-HER2A	1.234	0.364573	0.81338	0.356794	0.048731
HP-76507	Positive	Positive	Negative	Luminal B	non-HER2A	1.833	0.186118	0.848453	-0.151887	-0.16743
HP-76508	Positive	Positive	Negative	Luminal A	non-HER2A	2.303	0.308669	0.107038	-0.521103	-0.345011
HP-76511	Positive	Negative	Negative	Basal-like	non-HER2A	2.211	-0.489021	-1.20572	-1.47199	-1.38181
HP-76512	Negative	Negative	Negative	Luminal A	non-HER2A	1.912	0	-0.191886	-0.146128	0.109144
HP-76513	Negative	Negative	Negative	Basal-like	non-HER2A	1.366	0.0421369	-1.42219	-1.57113	-1.45115
HP-76515	Negative	Negative	Negative	Basal-like	non-HER2A	1.492	0.216214	-1.91008	-1.33605	-0.310743
HP-76516	Negative	Negative	Negative	Basal-like	non-HER2A	1.78	0.00603036	-1.62575	-2.00596	-1.62575
HP-76517	Positive	Positive	Negative	Luminal A	non-HER2A	1.981	0.233904	0.507092	0.332485	0.00549652
HP-76519	Positive	Positive	Negative	Luminal B	non-HER2A	2.047	0.259234	-0.273726	-0.458122	-0.225999
HP-76521	Positive	Positive	Negative	Luminal A	non-HER2A	0.704	0.260046	0.192227	-0.227668	0.0311644
HP-76522	Negative	Negative	Negative	Basal-like	non-HER2A	1.808	-0.220553	-0.67285	-0.848941	-0.429812
HP-76523	Negative	Negative	Positive	HER2E	HER2A	9.509	1.66966	-1.34075	-1.2738	-0.319557
HP-76526	Positive	Positive	Negative	Luminal A	non-HER2A	1.871	0.296403	0.261641	-0.613421	-0.184072
HP-76527	Positive	Negative	Negative	Basal-like	non-HER2A	2.259	0.14918	-0.710864	-2.1174	-1.30449
HP-76528	Positive	Negative	Negative	Luminal B	non-HER2A	1.56	0.436948	-0.373529	-0.92356	0.208327
HP-76529	Positive	Positive	Negative	Luminal A	non-HER2A	2.326	0.662045	0.730567	-0.774206	0.344353
HP-76530	Positive	Negative	Positive	Luminal A	HER2A	18.756	1.26723	-0.0835682	-0.451545	0.185277
HP-76531	Negative	Negative	Negative	Basal-like	non-HER2A	1.466	-0.331264	-1.40276	-1.42624	-1.3013
HP-76532	Negative	Negative	Negative	Basal-like	non-HER2A	1.868	-0.0154909	-1.36119	-1.00901	-1.20992
HP-76533	Positive	Positive	Negative	Luminal A	non-HER2A	2.214	0.521583	1.31734	1.08417	0.524652
HP-76534	Negative	Negative	Negative	Basal-like	non-HER2A	1.729	0.0180117	-1.37676	-1.57305	-0.926789
HP-76535	Negative	Negative	Negative	Basal-like	non-HER2A	1.206	-0.42557	-1.32668	-2.1128	-1.63568
HP-76536	Positive	Positive	Negative	Luminal A	non-HER2A	3.316	0.333326	0.145653	-0.723579	0.179511
HP-76538	Positive	Positive	Negative	Luminal A	non-HER2A	4.308	0.0871502	0.577236	-0.176091	0.0871502
HP-76539	Negative	Negative	Negative	Basal-like	non-HER2A	2.098	-0.356337	-1.19754	-1.62351	-0.954502
HP-76540	Negative	Negative	Negative	Basal-like	non-HER2A	1.735	-0.212859	-1.31417	-1.9078	-1.9078
HP-76541	Negative	Negative	Negative	HER2E	non-HER2A	1.648	-0.0993395	-1.26247	-1.5635	-0.171731
HP-76542	Positive	Negative	Negative	Luminal A	non-HER2A	1.615	0.118885	-0.0919684	-0.517937	-0.14996
HP-76543	Negative	Negative	Negative	Basal-like	non-HER2A	1.271	-0.731732	-1.85731	-1.83249	-1.10549
HP-76544	Negative	Negative	Negative	Basal-like	non-HER2A	1.505	0.107486	-0.944737	-1.08607	-0.944737
HP-76545	Positive	Positive	Negative	Luminal B	non-HER2A	2.446	0.812513	0.674858	-0.956657	0.422282
HP-76546	Negative	Negative	Positive	Basal-like	non-HER2A	1.868	0.317795	-1.12648	-1.71275	-1.21542
HP-76548	Negative	Negative	Negative	Basal-like	non-HER2A	2.655	0.30357	-0.931959	-0.931959	-1.23299
HP-76550	Negative	Negative	Negative	Basal-like	non-HER2A	1.989	0.136323	-1.43915	-1.74018	-1.36452
HP-76552	Positive	Positive	Negative	Luminal A	non-HER2A	1.84	0.0375116	-0.582773	-0.4456	-0.33445
HP-76553	Negative	Negative	Negative	Luminal B	non-HER2A	1.267	0.0367909	0.0622526	-1.29745	-0.0357598
HP-76555	Positive	Positive	Negative	Luminal B	non-HER2A	1.14	0.156413	0.323384	-0.150798	0.000426959
HP-76556	Positive	Positive	Negative	Luminal A	non-HER2A	1.061	-0.0637616	0.277293	-0.653089	-0.151088
HP-76563	Positive	Positive	Negative	Luminal A	non-HER2A	1.832	0.129419	0.0251502	0.128456	-0.0017653
